# Supplementary material for: Ag(i)-catalyzed cyclization of o-alkynylacetophenones facilitated through acetal formation: synthesis of C3-naphthyl indole derivatives
Source: Royal Society of Chemistry journal article supplement (doi:10.1039/d2ob01873j), 2022-01-01
Supplement: d2ob01873j1.pdf [file d2ob01873j1.pdf]

## Supporting Information

### Ag(I)-Catalyzed Cyclization of *o*-Alkynylacetophenones Facilitated Through Acetal Formation: Synthesis of C3-Naphthyl Indole Derivatives

Golla Ramesh, Valmuri Srivardhan and Rengarajan Balamurugan\*

School of Chemistry, University of Hyderabad, Gachibowli, Hyderabad-500046, India

bala@uohyd.ac.in

#### Table of Contents

| S.No | Description                                                                        | Page    |
|------|------------------------------------------------------------------------------------|---------|
| 1    | General information                                                                | S3      |
| 2    | Synthesis of <i>N</i> -protected indoles <b>2</b>                                  | S3-S4   |
| 3    | Synthesis of <i>o</i> -alkynylacetophenones <b>1</b>                               | S4-S6   |
| 4    | General procedure for the synthesis of C3-naphthyl indole derivatives <b>3</b>     | S6      |
| 5    | Characterization data of compounds <b>3</b> , <b>4aa</b> , and <b>5aa</b>          | S6-S19  |
| 6    | Procedure for the synthesis, and characterization data of <b>5ak</b> and <b>6k</b> | S19-S20 |
| 7    | Synthesis of <b>3bk</b> from <b>5ak</b>                                            | S20-S21 |
| 8    | Synthesis of <b>5ak</b> from <b>6k</b>                                             | S21     |
| 9    | Synthesis of <b>3aa</b> from <b>5aa</b>                                            | S21-S22 |

|    |                                                                                                                     |           |
|----|---------------------------------------------------------------------------------------------------------------------|-----------|
| 10 | Procedure for the synthesis of <b>7</b> and characterization data                                                   | S22-S23   |
| 11 | Synthesis of <b>3aa</b> from <b>7</b> and <b>2a</b>                                                                 | S23       |
| 12 | Procedure of scale-up reaction for the synthesis of <b>3aa</b>                                                      | S23-S24   |
| 13 | Copies of NMR Spectra of all the new compounds                                                                      | S25-S100  |
| 14 | <b>Figure S1:</b> <sup>1</sup> H NMR monitoring of the reaction of <b>1a</b> with <b>2a</b> in the presence of TMOF | S101      |
| 15 | X-ray data of compounds <b>3af</b> and <b>5ak</b>                                                                   | S102-S106 |
| 16 | References                                                                                                          | S106      |

## 1. General information

Unless otherwise mentioned, chemicals obtained from commercial suppliers were used without further purification. AgOTf and TMOF were purchased from Sigma-Aldrich, and Avra synthesis respectively, and were used without further purification. All the reactions were performed in oven-dried glassware with magnetic stirring. Dichloromethane (DCM) was dried in the presence of calcium hydride and distilled before use. Reactions were monitored using silica gel plates 60 F<sub>254</sub> and were visualized with UV light (254 nm), with Seebach stain followed by heating. Column chromatography was carried out using silica gel (100-200 mesh) packed in glass columns. NMR spectra were recorded at 400, 500 MHz (<sup>1</sup>H) and at 100, 125 MHz (<sup>13</sup>C), respectively. Chemical shifts (δ) are reported in ppm, using the residual solvent peak in CDCl<sub>3</sub> (H: δ = 7.26 and C: δ = 77.0 ppm) as internal standard, and coupling constants (J) are indicated in Hz. HRMS were recorded using ESI-TOF techniques.

## 2. Synthesis of *N*-protected indoles

*N*-protected indoles **2a-2e**, **2g**, **2h**, and **2o-2q** were synthesized according to the previous reports.<sup>1</sup> The other indole derivative **2f** was synthesized by the following procedure.

### Procedure for the synthesis of 1-benzyl-6-bromo-7-methyl-1H-indole **2f**

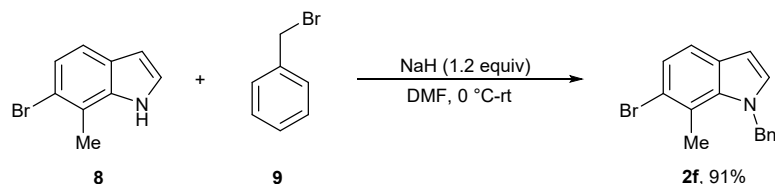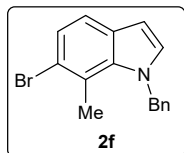

To a stirred solution of 6-bromo-7-methyl-1H-indole **8** (120 mg, 0.4 mmol) in DMF (3 mL) was added NaH (22 mg, 0.48 mmol) at 0 °C under nitrogen atmosphere. The reaction mixture was brought to room temperature and stirred for 30 minutes before adding benzyl bromide **9** (53 μL, 0.44 mmol) at 0 °C. Then, the reaction mixture was allowed to stir overnight at room temperature. After completion of the reaction, the reaction mixture was quenched with saturated aqueous NH<sub>4</sub>Cl

solution and extracted with ethyl acetate (3 x 10 mL). The combined organic layers were washed with saturated brine solution, dried over anhydrous Na<sub>2</sub>SO<sub>4</sub>, and concentrated under reduced pressure. The residue was purified by column chromatography (silica gel, hexane/EtOAc mixture as eluent) to afford the pure product **2f** as a white solid (137 mg, 91%). mp 98-100 °C. *R*<sub>f</sub> = 0.51 (in 5% EtOAc/Hex). IR (neat, cm<sup>-1</sup>): 1514, 1492, 1447, 1371, 1384, 1353, 1315, 1177, 1101, 1027, 972, 798, 721, 693. <sup>1</sup>H NMR (400 MHz, CDCl<sub>3</sub>): δ 7.35-7.33 (m, 1H), 7.31-7.26 (m, 4H), 7.06 (d, *J* = 3.2 Hz, 1H), 6.91-6.89 (m, 2H), 6.53 (d, *J* = 3.2 Hz, 1H), 5.57 (s, 2H), 2.60 (s, 3H). <sup>13</sup>C NMR (100 MHz, CDCl<sub>3</sub>): δ 139.1, 135.5, 131.3, 129.1, 128.9, 127.4, 125.3, 124.7, 120.7, 119.9, 119.8, 102.1, 52.8, 18.4. HRMS (ESI): calcd. for [C<sub>16</sub>H<sub>15</sub>BrN] [M+H]<sup>+</sup>: 300.0382; found: 300.0381.

### 3. Synthesis of *o*-alkynylacetophenones **1**

*o*-Alkynylacetophenones **1a-1e**, **1g**, **1h-1j**, **1l-1m** were synthesized according to the previous reports.<sup>2</sup> Other *o*-alkynylacetophenone derivatives **1f** and **1k** were synthesized by the following procedures.

#### Procedure for the synthesis of *N*-(3-(2-Acetylphenyl)prop-2-yn-1-yl)-4-methylbenzenesulfonamide **1f**<sup>3</sup>

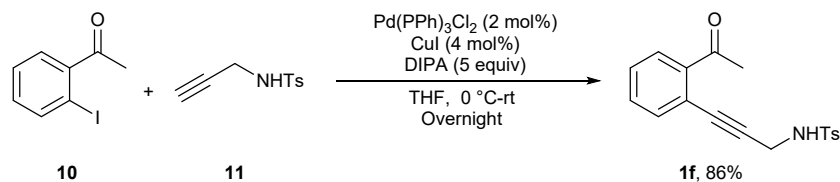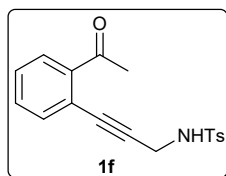

2-Iodoacetophenone **10** (400 mg, 1.62 mmol), and 4-methyl-*N*-(prop-2-yn-1-yl)benzenesulfonamide **11** (405 mg, 1.94 mmol), were dissolved in dry THF (17 mL). Then diisopropylamine (DIPA) (1.2 mL, 8.1 mmol) was added to the above solution under stirring before cooling down to the 0 °C. Later, Pd(PPh)<sub>3</sub>Cl<sub>2</sub> (12 mg, 0.064 mmol), and CuI (22 mg, 0.03 mmol) were added and the reaction mixture was allowed to warm to room temperature and stirred for overnight. After completion of the reaction, the reaction mixture was quenched with saturated aqueous NH<sub>4</sub>Cl solution and



extracted with ethyl acetate (3 x 20 mL). The combined organic layers were washed with saturated brine solution, dried over Na<sub>2</sub>SO<sub>4</sub>, and concentrated under reduced pressure. The residue was purified by flash column chromatography (silica gel, hexane/EtOAc mixture as eluent) to afford the pure product **1f** as a yellow solid (461 mg, 86%). mp 103-105 °C. *R*<sub>f</sub> = 0.33 (in 40% EtOAc/Hex). IR (neat, cm<sup>-1</sup>): 3282, 1682, 1594, 1478, 1426, 1322, 1246, 1157, 1067, 964, 812, 767, 662, 608. <sup>1</sup>H NMR (500 MHz, CDCl<sub>3</sub>): δ 7.79 (dt, *J* = 8.5, 2.0 Hz, 2H), 7.67-7.65 (m, 1H), 7.40-7.34 (m, 2H), 7.24 (d, *J* = 8.0 Hz, 2H), 7.22-7.20 (m, 1H), 4.90 (t, *J* = 5.5 Hz, 1H), 4.10 (d, *J* = 6.0 Hz, 2H), 2.55 (s, 3H), 2.33 (s, 3H). <sup>13</sup>C {<sup>1</sup>H} NMR (100 MHz, CDCl<sub>3</sub>): δ 199.7, 143.6, 140.3, 136.7, 134.1, 131.1, 129.6, 128.5, 128.4, 127.3, 126.3, 120.5, 88.8, 83.6, 33.8, 29.4, 21.3. HRMS (ESI): calcd. for [C<sub>18</sub>H<sub>17</sub>NNaO<sub>3</sub>S] [M+Na]<sup>+</sup>: 350.0821; found: 350.0827.

#### Procedure for the synthesis of 1-(5-nitro-2-(phenylethynyl)phenyl)ethan-1-one **1k**

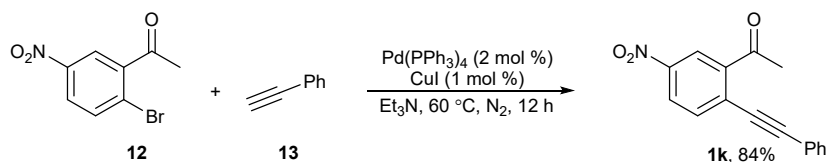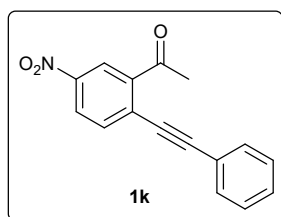

To a stirred solution of 1-(2-bromo-5-nitrophenyl)ethan-1-one **12** (500 mg, 2.05 mmol) in triethylamine (10 mL), Pd(PPh<sub>3</sub>)<sub>4</sub> (47 mg, 0.041 mmol) was added under nitrogen atmosphere. The resulting solution was stirred for 5 min before adding CuI (4 mg, 0.021 mmol). Then, phenylacetylene **13** (0.27 mL, 2.46 mmol) was added, and the reaction mixture was stirred at 60 °C for 12 h. It was then diluted with EtOAc, filtered through a celite pad, and evaporated under reduced pressure. The crude reaction mixture was purified by column chromatography to obtain pure 1-(5-nitro-2-(phenylethynyl)phenyl)ethan-1-one **1k** as a yellow solid (461 mg, 84%). mp = 111-113 °C, *R*<sub>f</sub> = 0.46 (in 10% EtOAc/Hex). IR (neat, cm<sup>-1</sup>): 3103, 2214, 1686, 1599, 1574, 1509, 1490, 1340, 1294, 1259, 1109, 1061, 910, 890, 845, 743, 685. <sup>1</sup>H NMR (500 MHz, CDCl<sub>3</sub>): δ 8.61 (d, *J* = 2.0 Hz, 1H), 8.31 (dd, *J* = 8.5, 2.5 Hz, 1H), 7.79 (d, *J* = 8.5 Hz, 1H), 7.59-7.57 (m, 2H), 7.45-7.39 (m, 3H), 2.83

(s, 3H).  $^{13}\text{C}$  NMR (100 MHz,  $\text{CDCl}_3$ ):  $\delta$  197.6, 146.7, 141.3, 134.9, 131.8, 129.8, 128.6, 128.0, 125.5, 123.9, 121.8, 100.5, 87.1, 29.7. HRMS (ESI): calcd. for  $[\text{C}_{16}\text{H}_{12}\text{NO}_3]$   $[\text{M}+\text{H}]^+$ : 266.0812; found: 266.0813.

#### 4. General procedure for the synthesis of C3-naphthyl indole derivatives **3**

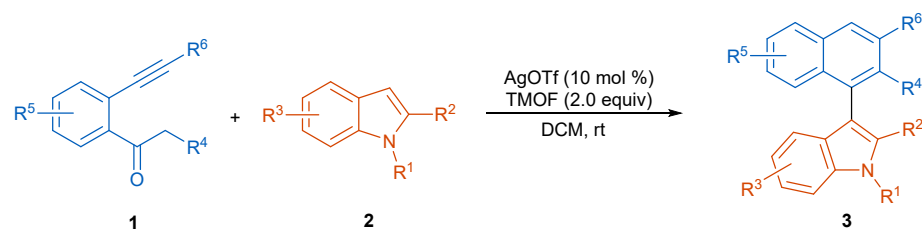

To a stirred solution of *o*-alkynylacetophenone **1** (1.2 equiv), *N*-protected indole **2** (0.4 mmol, 1.0 equiv) and TMOF (2.0 equiv) in DCM (4 mL) was added AgOTf (10 mol %) at room temperature. The reaction mixture was stirred at the same temperature. After completion of the reaction, the reaction mixture was concentrated under reduced pressure. The residue was purified by column chromatography (silica gel, hexane/EtOAc mixture as eluent) to afford the pure product **3**.

#### 5. Characterization data of compounds **3**, **4aa**, **5aa**, **5ak**, **6k**, and **7**

##### 1-Benzyl-3-(3-phenylnaphthalene-1-yl)-1*H*-indole **3aa**

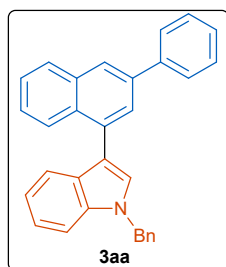

White solid (140 mg, 85%). mp 88-90 °C.  $R_f$  = 0.5 (in 5% EtOAc/Hex). IR (neat,  $\text{cm}^{-1}$ ): 1549, 1493, 1451, 1383, 1337, 1257, 1167, 1074, 1014, 883, 763, 736, 693.  $^1\text{H}$  NMR (500 MHz,  $\text{CDCl}_3$ ):  $\delta$  8.15 (d,  $J$  = 8.5 Hz, 1H), 8.08 (s, 1H), 8.49 (d,  $J$  = 8.0 Hz, 1H), 7.94-7.93 (m, 1H), 7.81-7.79 (m, 2H), 7.61 (dd,  $J$  = 8.0, 0.5 Hz, 1H), 7.55 (d,  $J$  = 7.5 Hz, 1H), 7.52-7.49 (m, 2H), 7.45-7.40 (m, 3H), 7.38-7.35 (m, 3H), 7.33-7.28 (m, 2H), 7.26 (d,  $J$  = 7.0 Hz, 2H), 7.18-7.15 (m, 1H), 5.46 (s, 2H).  $^{13}\text{C}$   $\{^1\text{H}\}$  NMR (125 MHz,  $\text{CDCl}_3$ ):  $\delta$  141.1, 138.2, 137.3, 136.6, 134.4, 133.5, 131.7, 128.9, 128.8, 128.6, 128.4, 127.7, 127.5, 127.4, 127.3, 127.0, 126.4, 126.1, 125.8, 124.9, 122.2, 120.6, 119.9, 115.6, 110.0, 50.3. HRMS (ESI): calcd. for  $[\text{C}_{31}\text{H}_{24}\text{N}]$   $[\text{M}+\text{H}]^+$ : 410.1903; found: 410.1905.

### 1-Benzyl-5-fluoro-3-(3-phenylnaphthalene-1-yl)-1*H*-indole 3ab

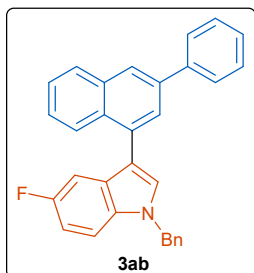

White solid (121 mg, 71%). mp 140-142 °C.  $R_f = 0.38$  (in 5% EtOAc/Hex). IR (neat,  $\text{cm}^{-1}$ ): 1542, 1480, 1447, 1246, 1181, 955, 895, 853, 790, 761, 693, 651.  $^1\text{H}$  NMR (500 MHz,  $\text{CDCl}_3$ ):  $\delta$  8.08 (d,  $J = 8.5$  Hz, 2H), 7.98 (d,  $J = 8.5$  Hz, 1H), 7.87 (d,  $J = 2.0$  Hz, 1H), 7.78 (dd,  $J = 8.5, 1.0$  Hz, 2H), 7.55-7.52 (m, 1H), 7.51-7.48 (m, 2H), 7.45-7.42 (m, 1H), 7.42 (s, 1H), 7.39-7.38 (m, 1H), 7.37-7.35 (m, 2H), 7.33-7.28 (m, 2H), 7.26-7.20 (m, 3H), 7.00 (td,  $J = 9.5, 2.5$  Hz, 1H), 5.43 (s, 2H).  $^{13}\text{C}$   $\{^1\text{H}\}$  NMR (125 MHz,  $\text{CDCl}_3$ ):  $\delta$  159.1, 157.2, 141.0, 138.2, 136.9, 134.3, 133.1, 132.9, 131.5, 129.2, 128.9, 128.8, 128.6, 127.8, 127.4, 127.3, 127.2, 126.8, 126.1 (d,  $J_{\text{CF}} = 30$  Hz), 125.9, 125.0, 115.5 (d,  $J_{\text{CF}} = 20$  Hz), 110.7 (d,  $J_{\text{CF}} = 15$  Hz), 110.6, 110.5, 105.4, 105.2, 50.5.  $^{19}\text{F}$  NMR (470 MHz,  $\text{CDCl}_3$ ), -124.0. HRMS (ESI): calcd. for  $[\text{C}_{31}\text{H}_{23}\text{FN}]$   $[\text{M}+\text{H}]^+$ : 428.1809; found: 428.1809.

### 1-Benzyl-5-chloro-3-(3-phenylnaphthalene-1-yl)-1*H*-indole 3ac

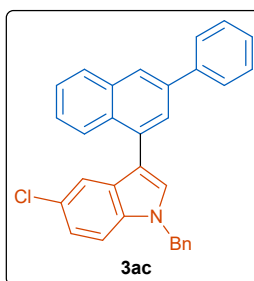

White solid (130 mg, 73%). mp 158-160 °C.  $R_f = 0.41$  (in 5% EtOAc/Hex). IR (neat,  $\text{cm}^{-1}$ ): 1595, 1494, 1467, 1349, 1267, 1169, 1065, 1028, 884, 851, 747, 693, 642.  $^1\text{H}$  NMR (500 MHz,  $\text{CDCl}_3$ ):  $\delta$  8.07 (s, 1H), 8.03 (d,  $J = 8.5$  Hz, 1H), 7.98 (d,  $J = 8.0$  Hz, 1H), 7.85 (d,  $J = 1.5$  Hz, 1H), 7.77 (d,  $J = 7.5$  Hz, 2H), 7.54 (d,  $J = 7.0$  Hz, 1H), 7.51-7.48 (m, 3H), 7.45-7.42 (m, 1H), 7.41-7.39 (m, 1H), 7.37 (s, 1H), 7.35 (d,  $J = 7.5$  Hz, 2H), 7.30-7.29 (m, 2H), 7.23-7.19 (m, 3H), 5.42 (s, 2H).  $^{13}\text{C}$   $\{^1\text{H}\}$  NMR (125 MHz,  $\text{CDCl}_3$ ):  $\delta$  140.9, 138.2, 136.8, 134.9, 134.3, 132.7, 131.6, 129.3, 128.9, 128.8, 128.6, 127.9, 127.4(4), 127.4(0), 127.3, 126.8, 126.2, 126.0, 125.9, 125.8, 125.2, 122.5, 119.8, 115.2, 111.0, 50.4. HRMS (ESI): calcd. for  $[\text{C}_{31}\text{H}_{23}\text{ClN}]$   $[\text{M}+\text{H}]^+$ : 444.1514; found: 444.1514.

### 1-Benzyl-5-bromo-3-(3-phenylnaphthalene-1-yl)-1*H*-indole 3ad

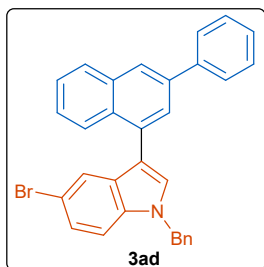

White solid (156 mg, 80%). mp 64-66 °C.  $R_f = 0.48$  (in 5% EtOAc/Hex). IR (neat,  $\text{cm}^{-1}$ ): 1595, 1493, 1466, 1349, 1266, 1168, 1027, 884, 789, 749, 693.  $^1\text{H}$  NMR (400 MHz,  $\text{CDCl}_3$ ):  $\delta$  8.07 (d,  $J = 1.6$  Hz, 1H), 7.99 (dd,  $J = 13.6, 8.4$  Hz, 2H), 7.83 (d,  $J = 2.0$  Hz, 1H), 7.78-7.75 (m, 2H), 7.65 (d,  $J = 2.0$  Hz, 1H), 7.55-7.47 (m, 3H), 7.45-7.40 (m, 1H), 7.39-7.35 (m, 3H), 7.34-7.30 (m, 3H), 7.25 (d,  $J = 8.4$  Hz, 1H), 7.21 (d,  $J = 6.8$  Hz, 2H), 5.42 (s, 2H).  $^{13}\text{C}$  NMR (100 MHz,  $\text{CDCl}_3$ ):  $\delta$  140.9, 138.2, 136.8, 135.1, 134.3, 132.6, 131.6, 130.0, 128.9, 128.8, 128.7, 128.6, 127.9, 127.4, 127.3, 126.8, 126.2, 126.0(9), 126.0(0), 125.2, 125.1, 122.9, 115.1, 113.4, 111.4, 50.4. HRMS (ESI): calcd. for  $[\text{C}_{31}\text{H}_{23}\text{BrN}]$   $[\text{M}+\text{H}]^+$ : 488.1008; found: 488.1008.

### 1-Benzyl-5-methoxy-3-(3-phenylnaphthalene-1-yl)-1H-indole 3ae

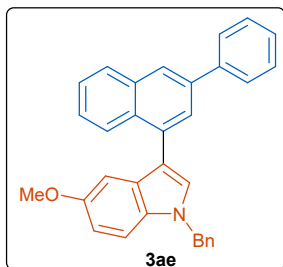

White solid (159 mg, 90%). mp 62-64 °C.  $R_f = 0.4$  (in 5% EtOAc/Hex). IR (neat,  $\text{cm}^{-1}$ ): 1482, 1448, 1338, 1282, 1213, 1175, 1040, 886, 790, 748, 694.  $^1\text{H}$  NMR (500 MHz,  $\text{CDCl}_3$ ):  $\delta$  8.11 (d,  $J = 8.5$  Hz, 1H), 8.06 (d,  $J = 1.5$  Hz, 1H), 7.98 (d,  $J = 8.0$  Hz, 1H), 7.89 (d,  $J = 2.0$  Hz, 1H), 7.79-7.77 (m, 2H), 7.54-7.51 (m, 1H), 7.50-7.47 (m, 2H), 7.44-7.40 (m, 1H), 7.39 (dt,  $J = 7.5, 1.0$  Hz, 1H), 7.36 (dt,  $J = 3.5, 1.0$  Hz, 1H), 7.35-7.33 (m, 2H), 7.30-7.27 (m, 2H), 7.24-7.22 (m, 2H), 6.98 (d,  $J = 2.0$  Hz, 1H), 6.91 (dd,  $J = 9.0, 2.5$  Hz, 1H), 5.41 (s, 2H), 3.71 (s, 3H).  $^{13}\text{C}$   $\{^1\text{H}\}$  NMR (100 MHz,  $\text{CDCl}_3$ ):  $\delta$  154.4, 141.0, 138.2, 137.3, 134.3, 133.6, 131.7, 131.6, 128.8, 128.6, 128.5, 128.3, 127.7, 127.4, 127.3, 127.2, 126.8, 126.5, 126.1, 125.7, 124.8, 115.1, 112.6, 110.8, 101.9, 55.8, 50.4. HRMS (ESI): calcd. for  $[\text{C}_{32}\text{H}_{26}\text{NO}]$   $[\text{M}+\text{H}]^+$ : 440.2009; found: 440.2009.

### 1-Benzyl-6-bromo-7-methyl-3-(3-phenylnaphthalen-1-yl)-1H-indole 3af

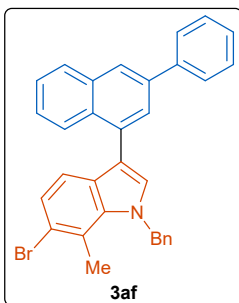

White solid (156 mg, 77%). mp 164-166 °C.  $R_f = 0.58$  (in 10% EtOAc/Hex). IR (neat,  $\text{cm}^{-1}$ ): 1599, 1493, 1448, 1410, 1351, 1171, 1014, 963, 877, 820, 790, 757, 689.  $^1\text{H}$  NMR (500 MHz,  $\text{CDCl}_3$ ):  $\delta$  8.06 (d,  $J = 1.5$  Hz, 1H), 8.01 (d,  $J = 8.5$  Hz, 1H), 7.97 (d,  $J = 8.5$  Hz, 1H), 7.85 (d,  $J = 2.0$  Hz, 1H), 7.76 (dt,  $J = 8.0, 1.5$  Hz, 2H), 7.53-7.47 (m, 3H), 7.42-7.41 (m, 1H), 7.39 (dt,  $J = 7.5, 1.0$  Hz, 1H), 7.36-7.33 (m, 2H), 7.31-7.28 (m, 3H), 7.21 (dd,  $J = 8.5, 0.5$  Hz, 1H), 7.05 (d,  $J = 7.0$  Hz, 2H), 5.70 (s, 2H), 2.69 (s, 3H).  $^{13}\text{C}$   $\{^1\text{H}\}$  NMR (125 MHz,  $\text{CDCl}_3$ ):  $\delta$  140.9, 138.9, 138.1, 135.7, 134.3, 132.7, 131.6, 130.6, 129.0, 128.8, 128.7, 128.6, 127.5, 127.49, 127.43, 127.3, 126.2, 126.1, 125.8, 125.4, 125.1, 124.9, 121.0, 120.3, 119.3, 115.6, 52.9, 18.4. HRMS (ESI): calcd. for  $[\text{C}_{32}\text{H}_{25}\text{BrN}]$   $[\text{M}+\text{H}]^+$ : 502.1165; found: 502.1164.

### 1-Benzyl-7-methyl-3-(3-phenylnaphthalen-1-yl)-1H-indole 3ag

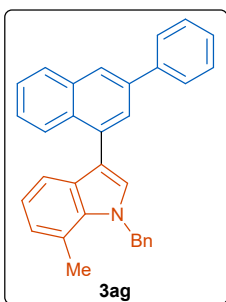

White solid (136 mg, 80%). mp 102-104 °C.  $R_f = 0.57$  (in 10% EtOAc/Hex). IR (neat,  $\text{cm}^{-1}$ ): 1597, 1493, 1448, 1414, 1375, 1169, 1074, 1028, 883, 812, 745, 693.  $^1\text{H}$  NMR (MHz,  $\text{CDCl}_3$ ):  $\delta$  8.12 (d,  $J = 8.5$  Hz, 1H), 8.08 (s, 1H), 7.99 (d,  $J = 8.0$  Hz, 1H), 7.92 (d,  $J = 2.0$  Hz, 1H), 7.79 (dt,  $J = 8.0, 1.0$  Hz, 2H), 7.55-7.49 (m, 3H), 7.45-7.43 (m, 1H), 7.42 (dt,  $J = 7.0, 1.5$  Hz, 1H), 7.39 (dt,  $J = 7.5, 1.5$  Hz, 1H), 7.35 (tt,  $J = 7.0, 1.0$  Hz, 2H), 7.31 (s, 1H), 7.30-7.27 (s, 1H), 7.08 (d,  $J = 7.5$  Hz, 2H), 7.04 (t,  $J = 7.0$  Hz, 1H), 6.99 (d,  $J = 7.0$  Hz, 1H), 5.71 (s, 2H), 2.64 (s, 3H).  $^{13}\text{C}$   $\{^1\text{H}\}$  NMR (100 MHz,  $\text{CDCl}_3$ ):  $\delta$  141.0, 139.4, 138.1, 135.2, 134.3, 133.4, 131.7, 129.6, 129.3, 128.9, 128.8, 128.5, 127.4, 127.3, 126.4, 126.1, 125.7, 125.5, 125.0, 124.8, 121.3, 120.1, 118.6, 115.5, 52.3, 19.6. HRMS (ESI): calcd. for  $[\text{C}_{32}\text{H}_{26}\text{N}]$   $[\text{M}+\text{H}]^+$ : 424.2060; found: 424.2060.

### 1-Methyl-3-(3-phenylnaphthalen-1-yl)-1H-indole 3ah

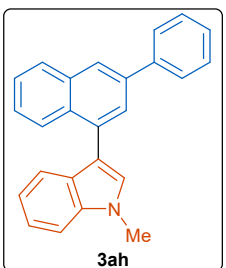

White solid (100 mg, 75%). mp 92-94 °C.  $R_f = 0.58$  (in 5% EtOAc/Hex). IR (neat,  $\text{cm}^{-1}$ ): 1594, 1472, 1355, 1227, 1154, 1114, 1064, 1012, 883, 735, 694.  $^1\text{H}$  NMR (400 MHz,  $\text{CDCl}_3$ ):  $\delta$  8.14 (d,  $J = 8.4$  Hz, 1H), 8.06 (s, 1H), 7.98

(d,  $J = 8.0$  Hz, 1H), 7.90 (d,  $J = 1.6$  Hz, 1H), 7.80-7.78 (m, 2H), 7.58 (d,  $J = 8.0$  Hz, 1H), 7.55-7.49 (m, 3H), 7.48-7.43 (m, 2H), 7.42-7.39 (m, 1H), 7.37-7.33 (m, 1H), 7.31 (s, 1H), 7.17-7.13 (m, 1H), 3.93 (s, 3H).  $^{13}\text{C}$   $\{^1\text{H}\}$  NMR (100 MHz,  $\text{CDCl}_3$ ):  $\delta$  141.1, 138.1, 136.9, 134.3, 133.6, 131.7, 128.8, 128.5, 128.3, 128.0, 127.4, 127.2(8), 127.2(4), 126.4, 126.1, 125.6, 124.7, 121.9, 120.4, 119.6, 114.9, 109.4, 32.8. HRMS (ESI): calcd. for  $[\text{C}_{25}\text{H}_{20}\text{N}]$   $[\text{M}+\text{H}]^+$ : 334.1590; found: 334.1593.

### 3-(3-Phenylnaphthalen-1-yl)-1H-indole 3ai

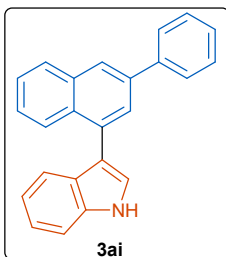

White solid (80 mg, 60%). mp 95-97 °C.  $R_f = 0.30$  (in 10% EtOAc/Hex). IR (neat,  $\text{cm}^{-1}$ ): 3412, 1594, 1492, 1452, 1418, 1243, 1092, 884, 739, 694.  $^1\text{H}$  NMR (400 MHz,  $\text{CDCl}_3$ ):  $\delta$  8.36 (bs, 1H), 8.11-8.08 (m, 2H), 7.99 (d,  $J = 8.4$  Hz, 1H), 7.91 (d,  $J = 2.0$  Hz, 1H), 7.80-7.78 (m, 2H), 7.57 (d,  $J = 8.0$  Hz, 1H), 7.56-7.53 (m, 1H), 7.52-7.48 (m, 3H), 7.44-7.41 (m, 2H), 7.38 (dt,  $J = 7.2, 2.0$  Hz, 1H), 7.32-7.28 (m, 1H), 7.18-7.14 (m, 1H).  $^{13}\text{C}$   $\{^1\text{H}\}$  NMR (100 MHz,  $\text{CDCl}_3$ ):  $\delta$  141.0, 138.1, 136.0, 134.3, 133.5, 131.7, 128.8, 128.5, 127.6, 127.4, 127.3(4), 127.3(3), 126.3, 126.1, 125.7, 124.9, 123.6, 122.4, 120.3, 120.1, 116.4, 111.2. HRMS (ESI): calcd. for  $[\text{C}_{24}\text{H}_{18}\text{N}]$   $[\text{M}+\text{H}]^+$ : 320.1434; found: 320.1436.

### 2-Methyl-3-(3-phenylnaphthalen-1-yl)-1H-indole 3aj

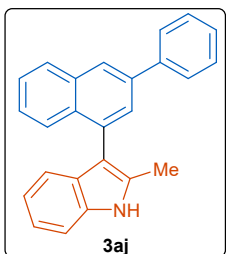

Yellow liquid (87 mg, 65%).  $R_f = 0.33$  (in 20% EtOAc/Hex). IR (neat,  $\text{cm}^{-1}$ ): 3399, 1595, 1494, 1457, 1324, 1303, 1244, 1212, 1011, 883, 741, 694.  $^1\text{H}$  NMR (500 MHz,  $\text{CDCl}_3$ ):  $\delta$  8.11 (bs, 1H), 8.09 (s, 1H), 7.99 (d,  $J = 8.0$  Hz, 1H), 7.81-7.77 (m, 4H), 7.53-7.46 (m, 3H), 7.42-7.36 (m, 3H), 7.30 (d,  $J = 8.0$  Hz, 1H), 7.20 (dt,  $J = 7.5, 1.5$  Hz, 1H), 7.08-7.04 (m, 1H), 2.37 (s, 3H).  $^{13}\text{C}$   $\{^1\text{H}\}$  NMR (100 MHz,  $\text{CDCl}_3$ ):  $\delta$  141.1, 138.1, 135.2, 134.2, 133.5, 132.7, 132.1, 129.3, 128.8, 128.5, 128.1, 127.4, 127.3, 126.6, 126.0, 125.6, 124.9, 121.4, 119.8, 119.3, 112.8, 110.2, 12.5. HRMS (ESI): calcd. for  $[\text{C}_{25}\text{H}_{20}\text{N}]$   $[\text{M}+\text{H}]^+$ : 334.1590; found: 334.1603.

### 1-Benzyl-3-(3-(p-tolyl)naphthalen-1-yl)-1H-indole 3ba

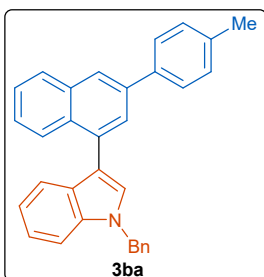

White solid (140 mg, 82%). mp 66–68 °C.  $R_f$  = 0.59 (in 10% EtOAc/Hex). IR (neat,  $\text{cm}^{-1}$ ): 1597, 1495, 1464, 1336, 1255, 1168, 1016, 887, 813, 731, 698.  $^1\text{H}$  NMR (400 MHz,  $\text{CDCl}_3$ ):  $\delta$  8.12 (d,  $J$  = 8.4 Hz, 1H), 8.04 (d,  $J$  = 1.6 Hz, 1H), 7.96 (d,  $J$  = 8.0 Hz, 1H), 7.89 (d,  $J$  = 2.0 Hz, 1H), 7.68 (dt,  $J$  = 8.0, 2.4 Hz, 2H), 7.59 (dt,  $J$  = 8.0, 1.2 Hz, 1H), 7.53–7.49 (m, 1H), 7.42–7.40 (m, 2H), 7.38–7.33 (m, 3H), 7.31–7.28 (m, 3H), 7.26–7.24 (m, 3H), 7.16–7.12 (m, 1H), 5.45 (s, 2H), 2.42 (s, 3H).  $^{13}\text{C}$  { $^1\text{H}$ } NMR (100 MHz,  $\text{CDCl}_3$ ):  $\delta$  138.1, 138.0, 137.2, 137.0, 136.5, 134.3, 133.3, 131.5, 129.5, 128.8, 128.5, 128.3, 127.7, 127.6, 127.2, 126.8, 126.3, 126.0, 125.5, 124.4, 122.1, 120.5, 119.8, 115.5, 109.9, 50.1, 21.1. HRMS (ESI): calcd. for  $[\text{C}_{32}\text{H}_{26}\text{N}]$   $[\text{M}+\text{H}]^+$ : 424.2060; found: 424.2061.

### 1-benzyl-3-(3-(*o*-tolyl)naphthalen-1-yl)-1H-indole 3bb

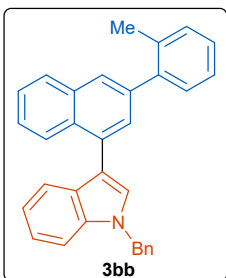

Yellow liquid (136 mg, 80%).  $R_f$  = 0.41 (in 5% EtOAc/Hex). IR (neat,  $\text{cm}^{-1}$ ): 1595, 1492, 1463, 1336, 1168, 1015, 905, 889, 725, 647.  $^1\text{H}$  NMR (500 MHz,  $\text{CDCl}_3$ ):  $\delta$  8.16 (d,  $J$  = 8.5 Hz, 1H), 7.93 (d,  $J$  = 8.0 Hz, 1H), 7.62 (d,  $J$  = 1.5 Hz, 1H), 7.58 (d,  $J$  = 8.0 Hz, 1H), 7.54–7.51 (m, 1H), 7.45–7.41 (m, 1H), 7.40–7.39 (m, 2H), 7.36–7.30 (m, 6H), 7.29–7.27 (m, 2H), 7.24–7.23 (m, 2H), 7.15–7.12 (m, 1H), 5.44 (s, 2H), 2.39 (s, 3H).  $^{13}\text{C}$  { $^1\text{H}$ } NMR (100 MHz,  $\text{CDCl}_3$ ):  $\delta$  141.8, 139.2, 137.2, 136.6, 135.5, 133.9, 132.6, 131.3, 130.3, 130.0, 129.4, 128.8, 128.3(7), 128.3(3), 127.7(5), 127.7(2), 127.3, 126.9, 126.8, 126.4, 125.9, 125.7, 125.6, 122.1, 120.5, 119.8, 115.5, 109.9, 50.2, 20.6. HRMS (ESI): calcd. for  $[\text{C}_{32}\text{H}_{26}\text{N}]$   $[\text{M}+\text{H}]^+$ : 424.2060; found: 424.2060.

### 1-benzyl-3-(3-(3-methoxyphenyl)naphthalen-1-yl)-1H-indole 3bc

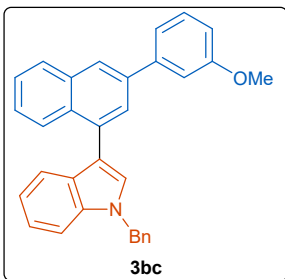

Yellow liquid (136 mg, 77%).  $R_f$  = 0.39 (in 5% EtOAc/Hex). IR (neat,  $\text{cm}^{-1}$ ): 1595, 1490, 1383, 1247, 1169, 1041, 780, 730, 693, 618.  $^1\text{H}$  NMR (500 MHz,  $\text{CDCl}_3$ ):  $\delta$  8.11 (d,  $J$  = 8.0 Hz, 1H), 8.04 (s, 1H), 7.96 (d,  $J$  =

8.5 Hz, 1H), 7.87 (d,  $J = 2.0$  Hz, 1H), 7.56 (d,  $J = 8.0$  Hz, 1H), 7.52-7.49 (m, 1H), 7.41-7.38 (m, 3H), 7.37-7.36 (m, 2H), 7.34-7.32 (m, 2H), 7.29-7.28 (m, 2H), 7.25-7.23 (m, 3H), 7.12 (t,  $J = 7.0$  Hz, 1H), 6.93-6.91 (m, 1H), 5.44 (s, 2H), 3.88 (s, 3H).  $^{13}\text{C}$   $\{^1\text{H}\}$  NMR (100 MHz,  $\text{CDCl}_3$ ):  $\delta$  159.9, 142.6, 138.0, 137.2, 136.5, 134.3, 133.4, 131.7, 129.7, 128.8, 128.5, 128.3, 127.7, 127.3, 126.9, 126.4, 126.1, 125.7, 124.9, 122.1, 120.5, 119.9(8), 119.9(2), 115.5, 113.1, 112.8, 109.9, 55.3, 50.2. HRMS (ESI): calcd. for  $[\text{C}_{32}\text{H}_{26}\text{NO}]$   $[\text{M}+\text{H}]^+$ : 440.2009; found: 440.2010.

### 1-Benzyl-3-(3-(4-methoxyphenyl)naphthalen-1-yl)-1H-indole 3bd

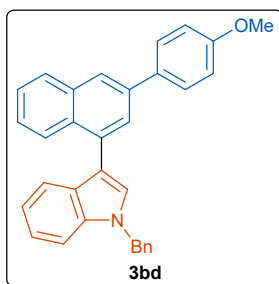

Yellow liquid (152 mg, 86%).  $R_f = 0.31$  (in 5% EtOAc/Hex). IR (neat,  $\text{cm}^{-1}$ ): 1606, 1512, 1462, 1244, 1029, 827, 730, 698.  $^1\text{H}$  NMR (500 MHz,  $\text{CDCl}_3$ ):  $\delta$  8.10 (d,  $J = 8.0$  Hz, 1H), 8.00 (s, 1H), 7.95 (d,  $J = 8.0$  Hz, 1H), 7.86 (s, 1H), 7.71 (d,  $J = 8.5$  Hz, 2H), 7.58 (d,  $J = 7.5$  Hz, 1H), 7.50 (t,  $J = 7.0$  Hz, 1H), 7.40 (t,  $J = 8.0$  Hz, 1H), 7.36 (s, 1H), 7.34 (d,  $J = 7.0$  Hz, 1H), 7.29 (t,  $J = 7.0$  Hz, 1H), 7.26-7.24 (m, 3H), 7.13 (t,  $J = 7.5$  Hz, 1H), 7.02 (d,  $J = 8.5$  Hz, 2H), 5.45 (s, 2H), 3.87 (s, 3H).  $^{13}\text{C}$   $\{^1\text{H}\}$  NMR (100 MHz,  $\text{CDCl}_3$ ):  $\delta$  159.1, 137.7, 137.2, 136.5, 134.4, 133.5, 133.3, 131.3, 128.7, 128.4, 128.3, 127.7, 127.1, 126.8, 126.3, 126.0, 125.4, 124.0,

122.1, 120.5, 119.8, 115.5, 114.2, 109.9, 55.2, 50.1. HRMS (ESI): calcd. for  $[\text{C}_{32}\text{H}_{26}\text{NO}]$   $[\text{M}+\text{H}]^+$ : 440.2009; found: 440.2009.

### 1-Benzyl-3-(3-hexylnaphthalen-1-yl)-1H-indole 3be

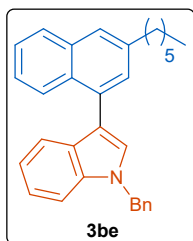

Yellow liquid (122 mg, 73%).  $R_f = 0.7$  (in 10% EtOAc/Hex). IR (neat,  $\text{cm}^{-1}$ ): 1599, 1543, 1495, 1463, 1386, 1352, 1252, 1168, 1075, 1014, 955, 877, 783, 737, 694, 616.  $^1\text{H}$  NMR (500 MHz,  $\text{CDCl}_3$ ):  $\delta$  8.06 (d,  $J = 8.5$  Hz, 1H), 7.85 (d,  $J = 8.0$  Hz, 1H), 7.63 (s, 1H), 7.54 (d,  $J = 8.0$  Hz, 1H), 7.48 (d,  $J = 1.5$  Hz, 1H), 7.47-7.44 (m, 1H), 7.39 (d,  $J = 8.0$  Hz, 1H), 7.35 (tt,  $J = 7.0, 1.5$  Hz, 3H), 7.33-7.26 (m, 3H), 7.25-7.23 (m, 3H), 7.14-7.11 (m, 1H), 5.44 (s, 2H), 2.81 (t,  $J = 7.5$  Hz, 2H), 1.78-1.72 (m, 2H), 1.45-1.39 (m, 2H), 1.37-1.31 (m, 4H), 0.90 (t,  $J = 7.0$  Hz, 3H).  $^{13}\text{C}$   $\{^1\text{H}\}$

NMR (125 MHz,  $\text{CDCl}_3$ ):  $\delta$  140.1, 137.4, 136.5, 134.3, 132.6, 130.9, 129.3, 128.8, 127.7, 127.6(9), 127.6(0), 126.9, 126.3, 125.6,



125.4, 124.8, 122.0, 120.5, 119.7, 115.7, 109.8, 50.2, 36.1, 31.7, 31.3, 29.1, 22.6. 14.0. HRMS (ESI): calcd. for  $[C_{31}H_{32}N]$   $[M+H]^+$ : 418.2529; found: 418.2529.

### N-((4-(1-benzyl-1*H*-indol-3-yl)naphthalen-2-yl)methyl)-4-methylbenzenesulfonamide 3bf

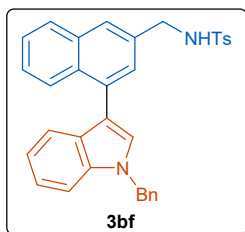

Yellow liquid (143 mg, 69%).  $R_f = 0.28$  (in 20% EtOAc/Hex). IR (neat,  $cm^{-1}$ ): 3276, 3029, 2923, 1598, 1494, 1464, 1452, 1323, 1153, 1091, 880, 812, 739, 663, 547.  $^1H$  NMR (500 MHz,  $CDCl_3$ ):  $\delta$  8.03 (d,  $J = 8.5$  Hz, 1H), 7.79 (d,  $J = 8.0$  Hz, 1H), 7.76 (d,  $J = 8.0$  Hz, 2H), 7.61 (s, 1H), 7.47 (t,  $J = 7.0$  Hz, 1H), 7.41-7.36 (m, 5H), 7.34 (d,  $J = 7.5$  Hz, 2H), 7.31-7.28 (m, 2H), 7.22 (t,  $J = 7.5$  Hz, 5H), 7.10 (t,  $J = 7.5$  Hz, 1H), 5.42 (s, 2H), 4.73 (t,  $J = 6.0$  Hz, 1H), 4.33 (d,  $J = 6.5$  Hz, 2H), 2.32 (s, 3H).  $^{13}C$   $\{^1H\}$  NMR (125 MHz,  $CDCl_3$ ):  $\delta$  143.4, 137.2, 136.9, 136.5, 133.8, 133.7, 133.2, 131.9, 129.6, 128.8, 128.1, 127.7, 127.6, 127.2, 127.1, 126.9, 126.5, 126.1, 125.9, 125.7, 122.2, 120.4, 119.9, 115.1, 109.9, 50.2, 47.4, 21.3. HRMS (ESI): calcd. for  $[C_{33}H_{29}N_2O_2S]$   $[M+H]^+$ : 517.1944; found: 517.1945.

### 1-Benzyl-3-(3-(thiophen-2-yl)naphthalen-1-yl)-1*H*-indole 3bg

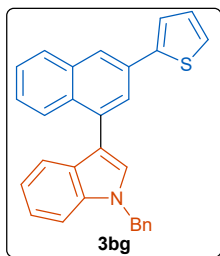

Yellow liquid (130 mg, 78%).  $R_f = 0.4$  (in 5% EtOAc/Hex). IR (neat,  $cm^{-1}$ ): 1596, 1542, 1494, 1463, 1385, 1352, 1234, 1167, 1028, 1012, 880, 853, 821, 729, 693.  $^1H$  NMR (500 MHz,  $CDCl_3$ ):  $\delta$  8.07-8.06 (m, 2H), 7.92 (d,  $J = 8.0$  Hz, 1H), 7.90 (d,  $J = 1.5$  Hz, 1H), 7.56 (d,  $J = 8.0$  Hz, 1H), 7.52-7.48 (m, 1H), 7.46 (dd,  $J = 3.5$  1.0 Hz, 1H), 7.42-7.38 (m, 2H), 7.37 (s, 1H), 7.37-7.36 (m, 2H), 7.33-7.32 (m, 1H), 7.30-7.28 (m, 1H), 7.26-7.25 (m, 3H), 7.16-7.12 (m, 2H), 5.45 (s, 2H).  $^{13}C$   $\{^1H\}$  NMR (125 MHz,  $CDCl_3$ ):  $\delta$  144.5, 137.2, 136.5, 134.3, 133.6, 131.8, 131.4, 128.8, 128.3, 128.2, 128.0, 127.7, 126.9, 126.4, 126.3, 126.0, 125.7, 124.9, 123.4, 123.3, 122.2, 120.4, 119.9, 115.2, 109.9, 50.2. HRMS (ESI): calcd. for  $[C_{29}H_{22}NS]$   $[M+H]^+$ : 416.1467; found: 416.1472.

### 1-Benzyl-3-(7-fluoro-3-phenylnaphthalen-1-yl)-1*H*-indole 3bh

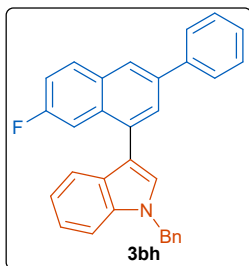

White solid (130 mg, 76%). mp 60–62 °C.  $R_f = 0.5$  (in 10% EtOAc/Hex). IR (neat,  $\text{cm}^{-1}$ ): 1598, 1543, 1497, 1451, 1386, 1328, 1241, 1173, 1075, 958, 915, 881, 805, 760, 725, 693.  $^1\text{H}$  NMR (400 MHz,  $\text{CDCl}_3$ ):  $\delta$ . 8.04 (s, 1H), 7.98–7.93 (m, 2H), 7.77–7.74 (m, 3H), 7.58 (dt,  $J = 7.6, 1.2$  Hz, 1H), 7.51–7.47 (m, 2H), 7.43–7.38 (m, 2H), 7.37–7.34 (m, 3H), 7.33–7.25 (m, 6H), 7.18–7.14 (m, 1H), 5.46 (s, 2H).  $^{13}\text{C}$   $\{^1\text{H}\}$  NMR (125 MHz,  $\text{CDCl}_3$ ):  $\delta$  160.8 (d,  $J = 244.0$  Hz), 140.8, 137.5 (d,  $J = 2.5$  Hz), 137.1, 136.6, 132.8 (dd,  $J = 50, 5$  Hz), 131.3, 130.9, 130.8, 128.8(7), 128.8(5), 128.1(9), 128.1(0), 127.7, 127.6, 127.3, 126.9, 124.6, 122.3, 120.2 (d,  $J = 21.2$  Hz), 116.4 (d,  $J = 26.2$  Hz), 115.0, 110.0, 109.8 (d,  $J = 21.2$  Hz), 50.2.  $^{19}\text{F}$  NMR (470 MHz,  $\text{CDCl}_3$ ):  $\delta$  -114.0. HRMS (ESI): calcd. for  $[\text{C}_{31}\text{H}_{23}\text{FN}]$   $[\text{M}+\text{H}]^+$ : 428.1809; found: 428.1809.

### 1-Benzyl-3-(7-phenylnaphtho[2,3-d][1,3]dioxol-5-yl)-1H-indole 3bi

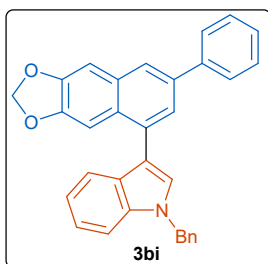

Yellow liquid (146 mg, 80%).  $R_f = 0.27$  (in 5% EtOAc/Hex). IR (neat,  $\text{cm}^{-1}$ ): 2922, 1603, 1494, 1455, 1278, 1231, 1173, 1035, 951, 882, 737, 693.  $^1\text{H}$  NMR (400 MHz,  $\text{CDCl}_3$ ):  $\delta$  7.88 (d,  $J = 2.0$  Hz, 1H), 7.74–7.72 (m, 3H), 7.56 (dt,  $J = 8.0, 1.0$  Hz, 1H), 7.48–7.44 (m, 2H), 7.40 (d,  $J = 9.0$  Hz, 2H), 7.37–7.33(7) (m, 3H), 7.33 (s, 1H), 7.31–7.27 (m, 1H), 7.25–7.23 (m, 3H), 7.15–7.12 (m, 1H), 6.02 (s, 2H), 5.44 (s, 2H).  $^{13}\text{C}$   $\{^1\text{H}\}$  NMR (125 MHz,  $\text{CDCl}_3$ ):  $\delta$  147.7, 147.6, 141.1, 137.3, 136.8, 136.5, 132.6, 131.5, 128.9, 128.8, 128.7, 128.2, 127.7, 127.4, 127.2, 127.0, 126.9, 126.0, 124.1, 122.1, 120.5, 119.9, 115.9, 109.9, 104.3, 102.9, 101.0, 50.2. HRMS (ESI): calcd. for  $[\text{C}_{32}\text{H}_{24}\text{NO}_2]$   $[\text{M}+\text{H}]^+$ : 454.1802; found: 458.1802.

### 1-Benzyl-3-(2-methyl-3-phenylnaphthalen-1-yl)-1H-indole 3bj

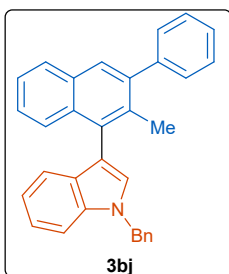

White solid (105 mg, 62%). mp 62–64 °C.  $R_f = 0.35$  (in 5% EtOAc/Hex). IR (neat,  $\text{cm}^{-1}$ ): 1595, 1493, 1464, 1451, 1422, 1385, 1349, 1259, 1212, 1171, 1149, 908, 886, 734, 693.  $^1\text{H}$  NMR (400 MHz,  $\text{CDCl}_3$ ):  $\delta$  7.85 (d,  $J = 8.0$  Hz, 1H), 7.78 (s, 1H), 7.65 (d,  $J = 8.4$  Hz, 1H), 7.49–7.46 (m, 4H), 7.44–7.36 (m, 4H), 7.35–7.30 (m, 3H), 7.29–7.26 (m, 1H), 7.25–7.22 (m, 3H), 7.18 (s, 1H), 7.10–7.06 (m, 1H), 5.47 (s, 2H), 2.18 (s, 3H).  $^{13}\text{C}$   $\{^1\text{H}\}$  NMR (100 MHz,  $\text{CDCl}_3$ ):  $\delta$  142.7, 141.2, 137.6, 136.5, 133.9, 133.5, 131.8, 131.4, 129.4, 128.9, 128.8, 128.0(9), 128.0(4), 127.9, 127.7, 127.6, 126.8, 126.7, 126.6, 125.6, 125.1, 121.9, 120.5, 119.6, 114.2, 109.8, 50.1, 19.4. HRMS (ESI): calcd. for  $[\text{C}_{32}\text{H}_{26}\text{N}]$   $[\text{M}+\text{H}]^+$ : 424.2060; found: 424.2061.

### 1-Benzyl-3-(7-nitro-3-phenyl-naphthalen-1-yl)-1H-indole derivative 3bk

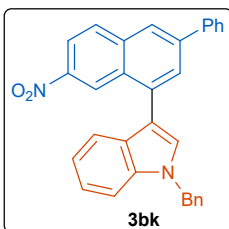

Yellow solid (132 mg, 73%). mp 160–162 °C.  $R_f = 0.40$  (in 10% EtOAc/Hex). IR (neat,  $\text{cm}^{-1}$ ): 2919, 2850, 1615, 1520, 1487, 1461, 1334, 1157, 1078, 886, 828, 735, 628.  $^1\text{H}$  NMR (500 MHz,  $\text{CDCl}_3$ ):  $\delta$  9.15 (d,  $J = 2.5$  Hz, 1H), 8.26 (dd,  $J = 9.0, 2.5$  Hz, 1H), 8.09–8.08 (m, 2H), 8.05 (d,  $J = 9.0$  Hz, 1H), 7.94–7.77 (m, 2H), 7.62 (dt,  $J = 5.0, 1.0$  Hz, 1H), 7.53–7.50 (m, 2H), 7.47–7.45 (m, 1H), 7.44 (tt,  $J = 7.5, 1.0$  Hz, 1H), 7.40 (s, 1H), 7.39–7.37 (m, 1H), 7.33–7.29 (m, 4H), 7.20–7.16 (m, 1H), 5.49 (s, 2H).  $^{13}\text{C}$   $\{^1\text{H}\}$  NMR (100 MHz,  $\text{CDCl}_3$ ):  $\delta$  145.4, 142.1, 140.0, 137.1, 136.8, 123.2, 130.3, 129.0(6), 129.0(0), 128.8, 128.2, 128.1, 127.9, 127.5, 127.1, 124.2, 123.5, 122.7, 120.6, 119.6, 113.8, 110.2, 50.3. HRMS (ESI): calcd. for  $[\text{C}_{31}\text{H}_{23}\text{N}_2\text{O}_2]$   $[\text{M}+\text{H}]^+$ : 455.1754; found: 455.1754.

### 1-Methyl-3-(3-propylnaphthalen-1-yl)-1H-indole 3hl

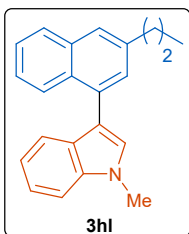

Yellow liquid (70 mg, 59%).  $R_f = 0.4$  (in 10% EtOAc/Hex). IR (neat,  $\text{cm}^{-1}$ ): 1613, 1597, 1574, 1540, 1498, 1476, 1372, 1333, 1244, 1225, 1149, 1130, 1113, 1056, 1011, 920, 850, 823, 807, 734, 647.  $^1\text{H}$  NMR (500 MHz,  $\text{CDCl}_3$ ):  $\delta$  8.12 (d,  $J = 8.0$  Hz, 1H), 7.89 (d,  $J = 8.0$  Hz, 1H), 7.67 (s, 1H), 7.58–7.57 (m, 1H), 7.51–7.48 (m, 2H), 7.46 (d,  $J = 8.5$  Hz, 1H), 7.40–7.33 (m, 2H), 7.28 (s, 1H), 7.19–7.16 (m, 1H), 3.92 (s, 3H), 2.84 (t,  $J = 7.0$  Hz, 2H), 1.83 (sext,  $J = 7.5$  Hz, 2H), 1.06 (t,  $J = 7.0$  Hz, 3H).  $^{13}\text{C}$   $\{^1\text{H}\}$  NMR (125 MHz,  $\text{CDCl}_3$ ):  $\delta$  139.8, 136.9, 134.2, 132.7, 130.9, 129.2,

128.1, 128.0, 127.7, 126.3, 125.6, 125.4, 124.7, 121.8, 120.4, 119.5, 115.0, 109.3, 38.1, 32.8, 24.4, 13.9. HRMS (ESI): calcd. for  $[C_{22}H_{22}N]$   $[M+H]^+$ : 300.1747; found: 300.1747.

### 3-(3-Butylnaphthalen-1-yl)-1-methyl-1H-indole 3hm

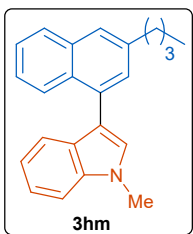

Yellow liquid (78 mg, 62%).  $R_f = 0.5$  (in 5% EtOAc/Hex). IR (neat,  $cm^{-1}$ ): 1598, 1542, 1463, 1422, 1358, 1332, 1245, 1227, 1152, 1130, 1115, 1059, 1011, 875, 810, 735, 646.  $^1H$  NMR (500 MHz,  $CDCl_3$ ):  $\delta$  8.06 (d,  $J = 8.5$  Hz, 1H), 7.84 (d,  $J = 8.5$  Hz, 1H), 7.62 (s, 1H), 7.52 (d,  $J = 8.0$  Hz, 1H), 7.47-7.45 (m, 2H), 7.43 (d,  $J = 8.5$  Hz, 1H), 7.35-7.29 (m, 2H), 7.25(5)-7.25(2) (m, 1H), 7.14-7.11 (m, 1H), 3.92 (s, 3H), 2.81 (t,  $J = 8.0$  Hz, 2H), 1.77-1.70 (m, 2H), 1.47-1.39 (m, 2H), 0.96 (t,  $J = 7.5$  Hz, 3H).  $^{13}C$   $\{^1H\}$  NMR (125 MHz,  $CDCl_3$ ):  $\delta$  140.0, 136.9, 134.2, 132.7, 130.9, 129.2, 128.1, 128.0, 127.7, 126.3, 125.6, 125.3, 124.7, 121.8, 120.4, 119.5, 115.0, 109.3, 35.8, 33.5, 32.8, 22.4, 14.0. HRMS (ESI): calcd. for  $[C_{23}H_{24}N]$   $[M+H]^+$ : 314.1903; found: 314.1904.

### 1-Benzyl-3-(3-butyl-1-naphthyl)-5-chloro-1H-indole 3cm

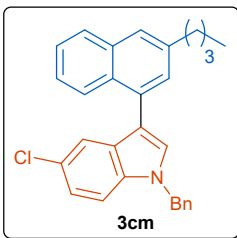

Yellow liquid (110 mg, 65%).  $R_f = 0.6$  (in 10% EtOAc/Hex). IR (neat,  $cm^{-1}$ ): 1600, 1495, 1468, 1386, 1352, 1261, 1169, 1065, 1025, 956, 872, 849, 789, 747, 729, 696.  $^1H$  NMR (500 MHz,  $CDCl_3$ ):  $\delta$  7.98 (d,  $J = 8.5$  Hz, 1H), 7.85 (d,  $J = 8.5$  Hz, 1H), 7.64 (s, 1H), 7.48-7.43 (3H), 7.38-7.36 (m, 2H), 7.34-7.33 (m, 2H), 7.32 (d,  $J = 7.0$  Hz, 1H), 7.28 (d,  $J = 9.0$  Hz, 1H), 7.21 (d,  $J = 7.5$  Hz, 2H), 7.19-7.17 (m, 1H), 5.41 (s, 2H), 2.82 (t,  $J = 8.0$  Hz, 2H), 1.74 (quint,  $J = 7.5$  Hz, 2H), 1.44 (sext,  $J = 7.5$  Hz, 2H), 0.98 (t,  $J = 7.5$  Hz, 3H).  $^{13}C$   $\{^1H\}$  NMR (125 MHz,  $CDCl_3$ ):  $\delta$  140.0, 136.9, 134.8, 134.2, 131.8, 130.8, 129.4, 129.3, 128.9, 128.8, 127.8(5), 127.8(3), 126.7, 125.9, 125.8, 125.7(7), 125.7(1), 125.0, 122.4, 119.9, 115.3, 110.9, 50.3, 35.7, 33.5, 22.4, 14.0. HRMS (ESI): calcd. for  $[C_{29}H_{27}ClN]$   $[M+H]^+$ : 424.1827; found: 424.1827.

### 1-Benzyl-5-fluoro-3-(3-propylnaphthalen-1-yl)-1H-indole 3bl

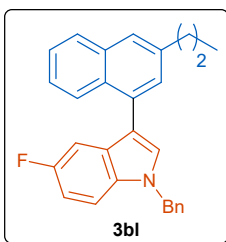

Yellow liquid (108 mg, 68%).  $R_f = 0.51$  (in 5% EtOAc/Hex). IR (neat,  $\text{cm}^{-1}$ ): 1599, 1576, 1481, 1451, 1353, 1245, 1181, 1092, 1024, 928, 889, 850, 789, 748, 702, 651.  $^1\text{H}$  NMR (400 MHz,  $\text{CDCl}_3$ ):  $\delta$  8.03 (d,  $J = 8.4$  Hz, 1H), 7.86 (d,  $J = 8.0$  Hz, 1H), 7.65 (s, 1H), 7.50-7.45 (m, 2H), 7.39-7.36 (m, 3H), 7.35-7.30 (m, 2H), 7.29-7.26 (m, 1H), 7.24-7.22 (m, 2H), 7.18 (dd,  $J = 9.6, 2.4$  Hz, 1H), 6.99 (td,  $J = 8.8, 2.4$  Hz, 1H), 5.41 (s, 2H), 2.80 (t,  $J = 7.6$  Hz, 2H), 1.8 (sext,  $J = 7.6$  Hz, 2H), 1.03 (t,  $J = 7.2$  Hz, 3H).  $^{13}\text{C}$   $\{^1\text{H}\}$  NMR (100 MHz,  $\text{CDCl}_3$ ):  $\delta$  158.1 (d,  $J = 233$  Hz), 139.8, 137.0, 134.2, 133.1, 132.0, 130.8, 129.2 (d,  $J = 4.0$  Hz), 128.9, 128.7 (d,  $J = 10$  Hz), 127.8 (d,  $J = 2.0$  Hz), 126.8, 126.0, 125.7 (d,  $J = 7.0$  Hz), 125.0, 115.6 (d,  $J = 5.0$  Hz), 110.6 (d,  $J = 3.0$  Hz), 110.5, 110.4, 105.3 (d,  $J = 24$  Hz), 50.5, 38.1, 24.4, 13.9.  $^{19}\text{F}$  NMR (470 MHz,  $\text{CDCl}_3$ ):  $\delta$  -124.3. HRMS (ESI): calcd. for  $[\text{C}_{28}\text{H}_{25}\text{FN}]$   $[\text{M}+\text{H}]^+$ : 394.1966; found: 394.1966.

### 1-Benzyl-6-fluoro-3-(3-(4-methoxyphenyl)naphthalen-1-yl)-1H-indole 3oe

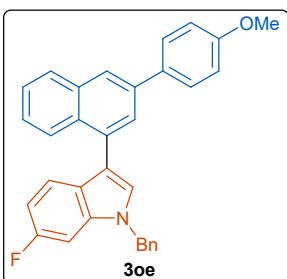

White solid (143 mg, 78%). mp 78-80 °C.  $R_f = 0.48$  (in 5% EtOAc/Hex). IR (neat,  $\text{cm}^{-1}$ ): 1606, 1579, 1545, 1512, 1466, 1452, 1332, 1281, 1244, 1170, 1112, 1089, 1029, 951, 907, 859, 826, 749, 701, 615.  $^1\text{H}$  NMR (500 MHz,  $\text{CDCl}_3$ ):  $\delta$  8.05 (d,  $J = 8.5$  Hz, 1H), 8.00 (s, 1H), 7.95 (d,  $J = 8.5$  Hz, 1H), 7.83 (d,  $J = 1.5$  Hz, 1H), 7.70 (dt,  $J = 9.0, 3.0$  Hz, 2H), 7.52-7.49 (m, 1H), 7.45 (dd,  $J = 8.5, 5.5$  Hz, 1H), 7.41-7.39 (m, 1H), 7.38-7.35 (m, 2H), 7.34 (s, 1H), 7.32 (m, 1H), 7.24-7.23 (m, 2H), 7.05 (dd,  $J = 10.0, 5.0$  Hz, 1H), 7.02 (dt,  $J = 9.0, 3.0$  Hz, 2H), 6.88 (td,  $J = 9.0, 2.0$  Hz, 1H), 5.38 (s, 2H), 3.87 (s, 3H).  $^{13}\text{C}$   $\{^1\text{H}\}$  NMR (125 MHz,  $\text{CDCl}_3$ ):  $\delta$  160.0 (d,  $J = 236$  Hz), 159.2, 137.7, 136.8, 136.5 (d,  $J = 11.2$  Hz), 134.4, 133.4, 132.9, 131.2, 128.9, 128.4(8), 128.4(2), 127.9(3), 127.9(1), 127.8, 127.1, 126.9, 126.1 (d,  $J = 20$  Hz), 125.5, 124.9, 124.3, 121.4 (d,  $J = 40$  Hz), 115.8, 114.2, 108.6 (d,  $J = 25$  Hz), 96.3 (d,  $J = 25$  Hz), 55.3, 50.4.  $^{19}\text{F}$  NMR (470 MHz,  $\text{CDCl}_3$ ):  $\delta$  -120.1. HRMS (ESI): calcd. for  $[\text{C}_{32}\text{H}_{25}\text{FNO}]$   $[\text{M}+\text{H}]^+$ : 458.1915; found: 458.1922.

### 1-Benzyl-6-methoxy-3-(3-(3-methoxyphenyl)naphthalen-1-yl)-1H-indole 3pd

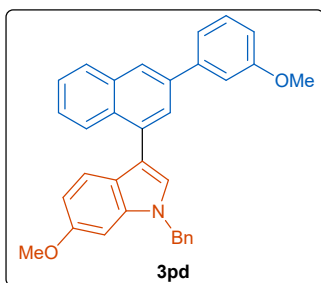

White solid (141 mg, 75%). mp 143–145 °C.  $R_f = 0.48$  (in 5% EtOAc/Hex). IR (neat,  $\text{cm}^{-1}$ ): 1595, 1571, 1488, 1453, 1331, 1257, 1212, 1168, 1094, 1040, 955, 879, 780, 748, 694.  $^1\text{H}$  NMR (500 MHz,  $\text{CDCl}_3$ ):  $\delta$  8.13 (d,  $J = 8.5$  Hz, 1H), 8.03 (s, 1H), 7.96 (d,  $J = 8.0$  Hz, 1H), 7.86 (d,  $J = 2.0$  Hz, 1H), 7.53–7.49 (m, 1H), 7.44–7.38 (m, 3H), 7.37–7.34 (m, 3H), 7.31–7.28 (m, 2H), 7.26–7.24 (m, 4H), 6.93 (ddd,  $J = 8.0, 2.5, 1.0$  Hz, 1H), 6.84 (d,  $J = 2.0$  Hz, 1H), 6.80 (dd,  $J = 9.0, 2.5$  Hz, 1H), 5.39 (s, 2H), 3.89 (s, 3H), 3.84 (s, 3H).  $^{13}\text{C}$   $\{^1\text{H}\}$  NMR (125 MHz,  $\text{CDCl}_3$ ):  $\delta$  159.9, 156.6, 142.6, 138.0, 137.3, 137.2, 134.2, 133.5, 131.7, 129.7, 128.8, 128.5, 127.7, 127.1, 126.9, 126.6, 126.4, 126.1, 125.7, 124.8, 122.7, 121.2, 119.9, 115.5, 113.0, 112.7, 93.5, 55.7, 55.3, 50.1. HRMS (ESI): calcd. for  $[\text{C}_{33}\text{H}_{27}\text{NNaO}_2]$   $[\text{M}+\text{Na}]^+$ : 492.1934; found: 492.1932.

#### N-((4-(1-Benzyl-7-methoxy-1H-indol-3-yl)naphthalen-2-yl)methyl)-4-methylbenzenesulfonamide 3qg

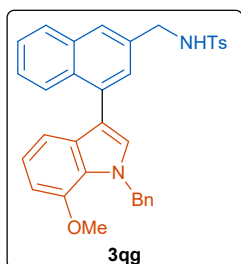

White solid (156 mg, 71%). mp 90–92 °C.  $R_f = 0.41$  (in 20% EtOAc/Hex). IR (neat,  $\text{cm}^{-1}$ ): 1573, 1494, 1452, 1426, 1324, 1257, 1213, 1155, 1089, 1060, 811, 748, 695, 660.  $^1\text{H}$  NMR (500 MHz,  $\text{CDCl}_3$ ):  $\delta$  7.98 (d,  $J = 8.5$  Hz, 1H), 7.76 (d,  $J = 8.5$  Hz, 1H), 7.74 (dt,  $J = 8.0, 2.0$  Hz, 2H), 7.58 (s, 1H), 7.47–7.44 (m, 1H), 7.37–7.34 (m, 1H), 7.33–7.29 (m, 3H), 7.26–7.23 (m, 1H), 7.21–7.19 (dd,  $J = 7.5, 1.5$  Hz, 4H), 7.13 (s, 1H), 7.00–6.97 (m, 1H), 6.96–6.94 (m, 1H), 6.68 (dd,  $J = 7.0, 1.0$  Hz, 1H), 5.72 (s, 2H), 4.75 (t,  $J = 6.0$  Hz, 1H), 4.31 (d,  $J = 6.0$  Hz, 2H), 3.88 (s, 3H), 2.31 (s, 3H).  $^{13}\text{C}$   $\{^1\text{H}\}$  NMR (125 MHz,  $\text{CDCl}_3$ ):  $\delta$  147.6, 143.4, 139.3, 136.7, 133.8, 133.7, 133.1, 131.8, 130.1, 129.6, 128.5, 128.0, 127.2, 127.1, 126.8, 126.5, 126.1, 125.8, 125.7, 120.2, 115.3, 113.0, 103.0, 55.4, 52.5, 47.4, 21.3. HRMS (ESI): calcd. for  $[\text{C}_{34}\text{H}_{31}\text{N}_2\text{O}_3\text{S}]$   $[\text{M}+\text{H}]^+$ : 547.2050; found: 547.2049.

#### 1-Benzyl-3-(1-methyl-3-phenyl-1H-isochromen-1-yl)-1H-indole 5aa

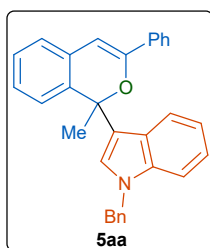

Yellow solid. mp 150-152 °C.  $R_f$  = 0.46 (in 10% EtOAc/Hex). IR (neat,  $\text{cm}^{-1}$ ): 1594, 1494, 1450, 1384, 1167, 1027, 905, 733.  $^1\text{H}$  NMR (500 MHz,  $\text{CDCl}_3$ ):  $\delta$  7.74-7.72 (m, 2H), 7.67 (dt,  $J$  = 8.0, 1.0 Hz, 1H), 7.33-7.29 (m, 4H), 7.28-7.27 (m, 2H), 7.23 (dd,  $J$  = 7.5, 1.5 Hz, 1H), 7.21 (dt,  $J$  = 8.0, 1.0 Hz, 1H), 7.14 (dd,  $J$  = 7.5, 1.0 Hz, 1H), 7.12-7.07 (m, 4H), 7.02-6.98 (m, 1H), 6.97 (dt,  $J$  = 7.5, 1.0 Hz, 1H), 6.89 (s, 1H), 6.44 (s, 1H), 5.26 (s, 2H), 2.17 (s, 3H).  $^{13}\text{C}$  NMR (100 MHz,  $\text{CDCl}_3$ ):  $\delta$  151.4, 137.5, 137.4, 135.2, 135.0, 131.2, 128.8, 128.5, 128.2, 127.8, 127.6, 126.7, 126.6, 126.5, 125.3, 124.5, 123.9, 122.0, 121.8, 119.6, 119.4, 109.9, 100.2, 79.6, 50.1, 26.0. HRMS (ESI): calcd. for  $[\text{C}_{31}\text{H}_{26}\text{NO}]$   $[\text{M}+\text{H}]^+$ : 428.2009; found: 428.2009.

#### (5-Benzyl-11-methyl-5H-benzo[*b*]carbazol-6-yl)(phenyl)methanone 4aa

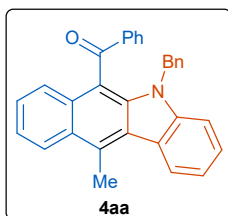

Yellow solid. mp 185-187 °C.  $R_f$  = 0.36 (in 5% EtOAc/Hex). IR (neat,  $\text{cm}^{-1}$ ): 1663, 1594, 1470, 1398, 1316, 1228, 1157, 1026, 929, 731.  $^1\text{H}$  NMR (500 MHz,  $\text{CDCl}_3$ ):  $\delta$  8.49 (d,  $J$  = 7.5 Hz, 1H), 8.38 (dq,  $J$  = 1.0, 0.5 Hz, 1H), 7.57 (dq,  $J$  = 1.5, 1.0 Hz, 3H), 7.49-7.42 (m, 2H), 7.37 (dt, 7.0, 1.5 Hz, 1H), 7.35-7.31 (m, 2H), 7.24 (d,  $J$  = 8.5 Hz, 1H), 7.15 (t,  $J$  = 8.0 Hz, 2H), 6.98-6.92 (m, 3H), 6.73-6.71 (m, 2H), 5.39 (s, 2H), 3.36 (s, 3H).  $^{13}\text{C}$  NMR (100 MHz,  $\text{CDCl}_3$ ):  $\delta$  199.3, 138.3, 136.6, 133.3, 131.1, 130.2, 129.9, 128.4, 128.2, 127.1, 126.8, 126.7, 125.8, 125.5, 124.9, 124.2, 124.0, 123.8, 123.4, 122.8, 119.8, 114.3, 108.9, 48.1, 15.9. HRMS (ESI): calcd. for  $[\text{C}_{31}\text{H}_{24}\text{NO}]$   $[\text{M}+\text{H}]^+$ : 426.1852; found: 426.1857.

#### 6. Procedure for the synthesis of 1-Benzyl-3-(1-methyl-7-nitro-3-phenyl-1H-isochromen-1-yl)-1H-indole 5ak and 1-Methoxy-1-methyl-7-nitro-3-phenyl-1H-isochromene 6k:

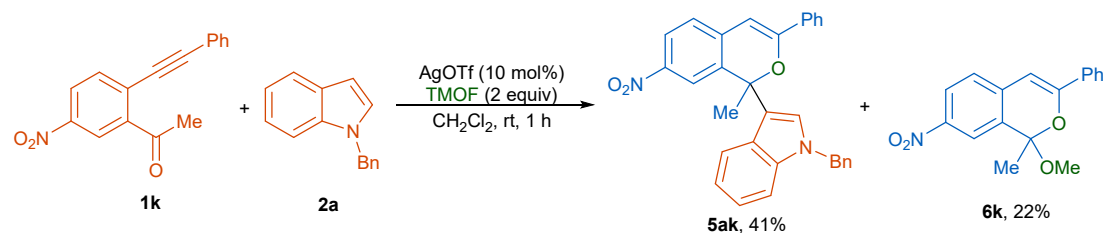

To a stirred solution of 1-(5-nitro-2-(phenylethynyl)phenyl)ethan-1-one **1k**<sup>4</sup> (127 mg, 0.48 mmol), 1-benzyl-1*H*-indole **2a** (83 mg, 0.48 mmol) and TMOF (88  $\mu$ L, 0.8 mmol) in DCM (4 mL) was added AgOTf (10 mg, 0.04 mmol) at room temperature under nitrogen atmosphere. The reaction mixture was stirred at the same temperature. After completion of the reaction, reaction mixture was concentrated under reduced pressure. The residue was purified by column chromatography (silica gel, hexane/EtOAc mixture as eluent) to afford the pure products 1-benzyl-3-(1-methyl-7-nitro-3-phenyl-1*H*-isochromen-1-yl)-1*H*-indole **5ak** and 1-methoxy-1-methyl-7-nitro-3-phenyl-1*H*-isochromene **6k** in 41% and 22% respectively.

### 1-Benzyl-3-(1-methyl-7-nitro-3-phenyl-1*H*-isochromen-1-yl)-1*H*-indole **5ak**

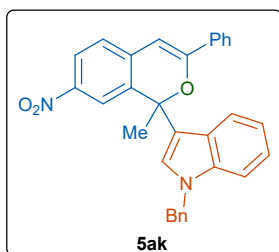

Yellow solid (78 mg, 41%). mp 142-144 °C.  $R_f$  = 0.15 (in 10% EtOAc/Hex). IR (neat,  $\text{cm}^{-1}$ ): 1568, 1493, 1450, 1325, 1246, 1102, 1056, 899, 763, 718, 690.  $^1\text{H}$  NMR (500 MHz,  $\text{CDCl}_3$ ):  $\delta$  8.11 (dd,  $J$  = 8.0, 2.0 Hz, 1H), 7.79-7.77 (m, 3H), 7.59 (d,  $J$  = 8.0 Hz, 1H), 7.37-7.36 (m, 3H), 7.34 (d,  $J$  = 7.5 Hz, 2H), 7.30-7.27 (m, 2H), 7.23 (d,  $J$  = 8.5 Hz, 1H), 7.15 (d,  $J$  = 7.5 Hz, 1H), 7.12 (d,  $J$  = 8.5 Hz, 2H), 7.01 (t,  $J$  = 7.0 Hz, 2H), 6.53 (s, 1H), 5.33 (s, 2H), 2.19 (s, 3H).  $^{13}\text{C}$  NMR (100 MHz,  $\text{CDCl}_3$ ):  $\delta$  155.5, 145.9, 137.9, 137.6, 137.1, 135.3, 134.0, 129.8, 128.9, 128.4, 127.7, 127.4, 126.7, 126.2, 125.8, 124.0, 123.7, 122.3, 121.5, 120.4, 119.8, 118.3, 110.1, 98.6, 80.3, 50.1, 26.0. HRMS (ESI): calcd. for  $[\text{C}_{31}\text{H}_{25}\text{N}_2\text{O}_3]$   $[\text{M}+\text{H}]^+$ : 473.1860; found: 473.1864.

### 1-Methoxy-1-methyl-7-nitro-3-phenyl-1*H*-isochromene **6k**

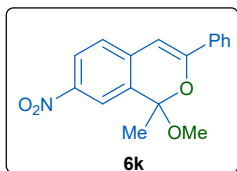

Yellow solid (30 mg, 22%). mp 86-88 °C.  $R_f$  = 0.35 (in 10% EtOAc/Hex). IR (neat,  $\text{cm}^{-1}$ ): 1670, 1579, 1526, 1349, 1196, 911, 836, 735, 666.  $^1\text{H}$  NMR (400 MHz,  $\text{CDCl}_3$ ):  $\delta$  8.23 (d,  $J$  = 2.4 Hz, 1H), 8.18 (dd,  $J$  = 8.4, 2.4 Hz, 1H), 7.85-7.81 (m, 2H), 7.47-7.42 (m, 3H), 7.25 (d,  $J$  = 8.4 Hz, 1H), 6.51 (s, 1H), 3.32 (s, 3H), 1.97 (s, 3H).  $^{13}\text{C}$   $\{^1\text{H}\}$  NMR (100 MHz,  $\text{CDCl}_3$ ):  $\delta$  154.4, 146.1, 137.8, 133.1, 130.5, 130.0, 128.6, 125.3, 124.6, 124.4, 120.6, 102.8, 97.9, 50.6, 25.7. HRMS (ESI): calcd. for  $[\text{C}_{16}\text{H}_{12}\text{NO}_3]$   $[\text{M}-\text{OMe}]^+$ : 266.0812; found: 266.0817.

### 7. Synthesis of 1-benzyl-3-(7-nitro-3-phenyl-naphthalen-1-yl)-1*H*-indole **3bk** from **5ak**



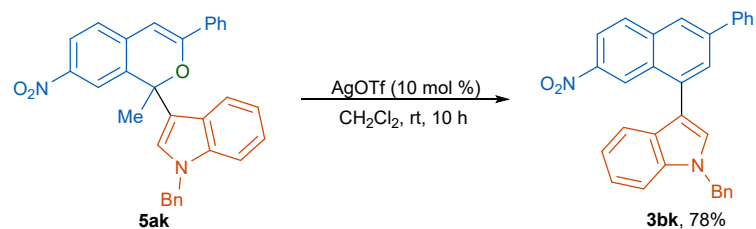

To a stirred solution of 1-benzyl-3-(1-methyl-3-phenyl-1*H*-isochromen-1-yl)-1*H*-indole **5ak** (12 mg, 0.028 mmol) in DCM (1 mL) was added AgOTf (0.7 mg, 0.0028 mmol) at room temperature under nitrogen atmosphere. The reaction mixture was stirred at the same temperature. After completion of the reaction, reaction mixture was concentrated under reduced pressure. The residue was purified by column chromatography (silica gel, hexane/EtOAc mixture as eluent) to afford the pure 1-benzyl-3-(7-nitro-3-phenylnaphthalen-1-yl)-1*H*-indole derivative **3bk** (10 mg, 78%).

### 8. Synthesis of **5ak** from 1-methoxy-1-methyl-7-nitro-3-phenyl-1*H*-isochromene **6k** and 1-benzyl-1*H*-indole **2a**

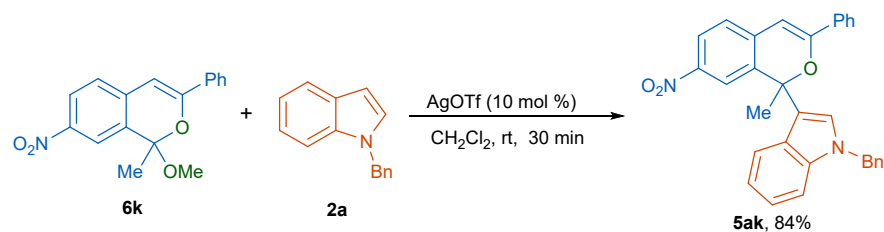

To a stirred solution of 1-methoxy-1-methyl-7-nitro-3-phenyl-1*H*-isochromene **6k** (15 mg, 0.06 mmol) and 1-benzyl-1*H*-indole **2a** (10 mg, 0.05 mmol) in DCM (1 mL) was added AgOTf (1.2 mg, 0.005 mmol) at room temperature under nitrogen atmosphere. The reaction mixture was stirred at the same temperature. After completion of the reaction, reaction mixture was concentrated under reduced pressure. The residue was purified by column chromatography (silica gel, hexane/EtOAc mixture as eluent) to afford the pure 1-benzyl-3-(1-methyl-7-nitro-3-phenyl-1*H*-isochromen-1-yl)-1*H*-indole **5ak** as a yellow solid (10 mg, 84%).

### 9. Synthesis of 1-benzyl-3-(3-phenylnaphthalen-1-yl)-1*H*-indole **3aa** from 1-benzyl-3-(1-methyl-3-phenyl-1*H*-isochromen-1-yl)-1*H*-indole **5aa**

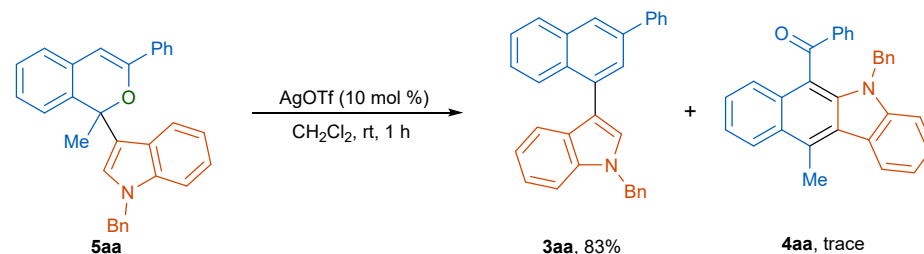

To a stirred solution of 1-benzyl-3-(1-methyl-3-phenyl-1*H*-isochromen-1-yl)-1*H*-indole **5aa** (23 mg, 0.05 mmol) in DCM (1 mL) was added AgOTf (1.4 mg, 0.005 mmol) at room temperature under nitrogen atmosphere. The reaction mixture was stirred at the same temperature. After completion of the reaction, the reaction mixture was concentrated under reduced pressure. The residue was purified by column chromatography (silica gel, hexane/EtOAc mixture as eluent) to afford the pure 1-benzyl-3-(3-phenylnaphthalen-1-yl)-1*H*-indole **3aa** in 83% (17 mg) yield along with trace amount of (5-benzyl-11-methyl-5*H*-benzo[*b*]carbazol-6-yl)(phenyl)methanone **4aa**.

#### 10. Procedure for the synthesis of 1-(1,1-dimethoxyethyl)-2-(phenylethynyl)benzene **7<sup>5</sup>**

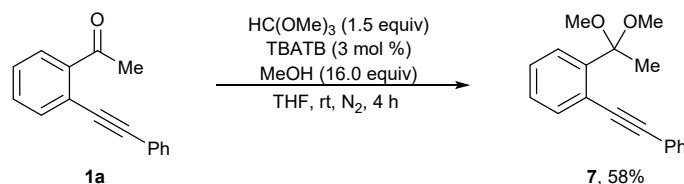

A solution of 1-(2-(phenylethynyl)phenyl)ethan-1-one **1a** (250 mg, 1.1 mmol), MeOH (712  $\mu\text{L}$ , 17.6 mmol), TMOF (182  $\mu\text{L}$ , 1.65 mmol), tetrabutylammonium tribromide (TBATB) (16 mg, 0.03 mmol) and THF (2 mL) were stirred for 4 h at room temperature. Then, the reaction mixture was diluted with EtOAc (15 mL), and washed with saturated aqueous solution of  $\text{NaHCO}_3$ . The resulting organic layer was concentrated under reduced pressure and purified by column chromatography (silica gel, hexane/EtOAc mixture as

eluent) to afford the pure product 1-(1,1-dimethoxyethyl)-2-(phenylethynyl)benzene **7** as a yellow liquid (170 mg, 58%).  $R_f = 0.43$  (in 5% EtOAc/Hex). IR (neat,  $\text{cm}^{-1}$ ): 1678, 1592, 1491, 1440, 1355, 1275, 1244, 1068, 956, 753, 688, 595.  $^1\text{H}$  NMR (500 MHz,  $\text{CDCl}_3$ ):  $\delta$  7.72 (dd,  $J = 8.0, 1.5$  Hz, 1H), 7.57 (dd,  $J = 7.5, 1.5$  Hz, 1H), 7.55-7.53 (m, 2H), 7.36-7.32 (m, 3H), 7.32-7.30 (m, 1H), 7.28 (dd,  $J = 7.5, 1.5$  Hz, 1H), 3.25 (s, 6H), 1.75 (s, 3H).  $^{13}\text{C}$   $\{^1\text{H}\}$  NMR (125 MHz,  $\text{CDCl}_3$ ):  $\delta$  144.0, 134.0, 131.4, 128.2, 128.04, 128.02, 127.5, 127.4, 123.9, 120.8, 101.5, 93.1, 89.1, 48.8, 23.7. HRMS (ESI): calcd. for  $[\text{C}_{18}\text{H}_{18}\text{NaO}_2]$   $[\text{M}+\text{Na}]^+$ : 289.1199; found: 289.1194.

### 11. Synthesis of **3aa** from 1-(1,1-dimethoxyethyl)-2-(phenylethynyl)benzene **7** and 1-benzyl-1*H*-indole **2a**

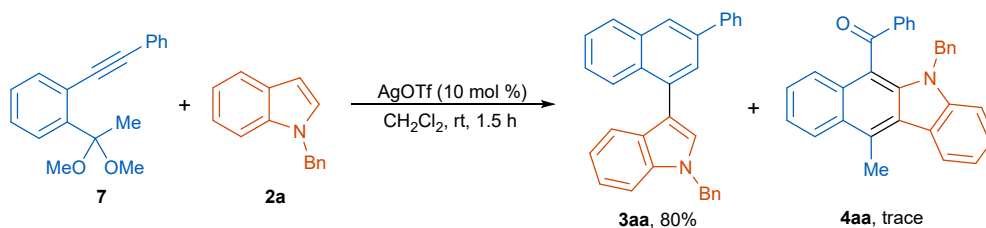

To a stirred solution of 1-(1,1-dimethoxyethyl)-2-(phenylethynyl)benzene **7** (64 mg, 0.24 mmol) and 1-benzyl-1*H*-indole **2a** (41 mg, 0.2 mmol) in DCM (2 mL) was added AgOTf (5 mg, 0.02 mmol) at room temperature under nitrogen atmosphere. The reaction mixture was stirred at the same temperature. After completion of the reaction, the reaction mixture was concentrated under reduced pressure. The residue was purified by column chromatography (silica gel, hexane/EtOAc mixture as eluent) to afford the pure 1-benzyl-3-(3-phenylnaphthalen-1-yl)-1*H*-indole **3aa** in 80% (66 mg) yield.

### 12. Procedure for scale-up reaction for the synthesis of **3aa**

To a stirred solution of 1-(2-(phenylethynyl)phenyl)ethan-1-one **1a** (1.32 g, 6 mmol), 1-benzyl-1*H*-indole **2a** (1.03 g, 5 mmol) and TMOF (1.09 mL, 10 mmol) in DCM (40 mL) was added AgOTf (128 mg, 0.5 mmol) at room temperature under nitrogen atmosphere. The reaction mixture was stirred at the same temperature. After completion of the reaction, the reaction mixture was

concentrated under reduced pressure. The residue was purified by column chromatography (silica gel, hexane/EtOAc mixture as eluent) to afford the pure product **3aa** in 80% (1.65 g) yield along with 10% (212 mg) of the product **4aa**.

### 13. Copies of NMR Spectra

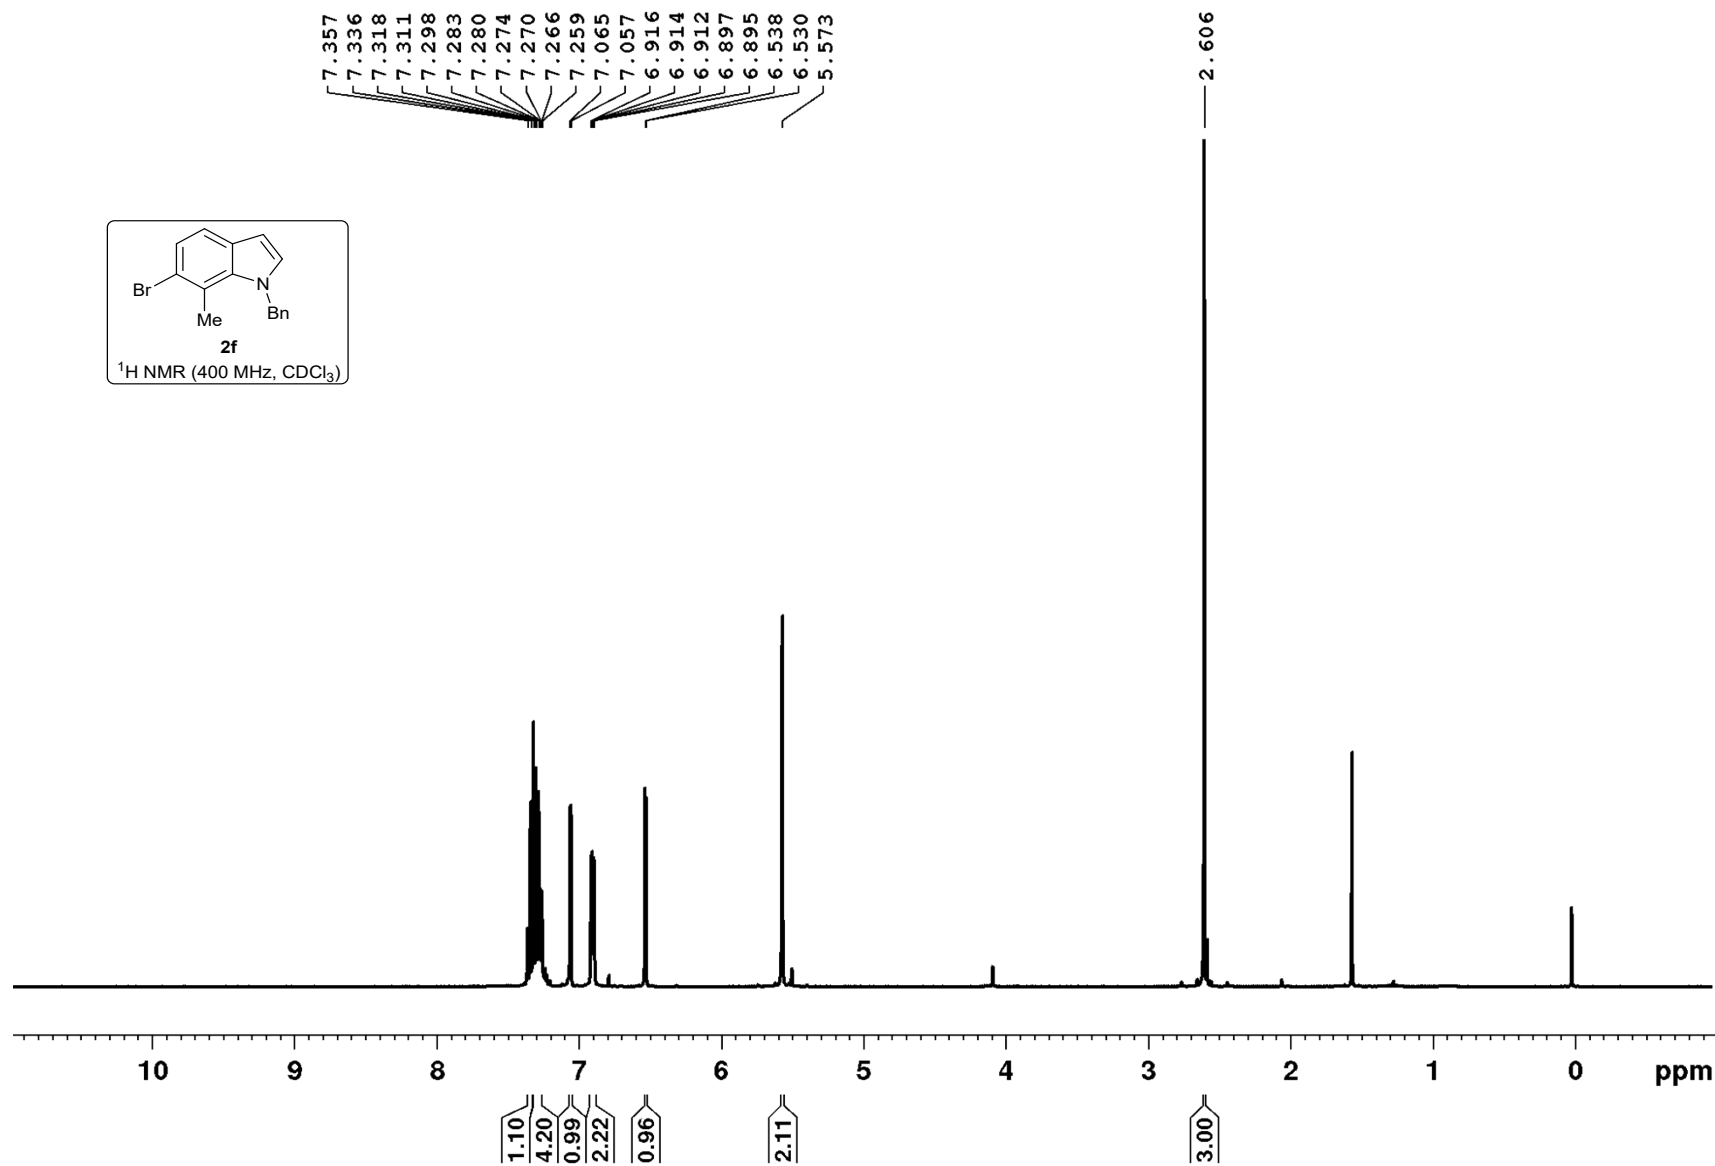

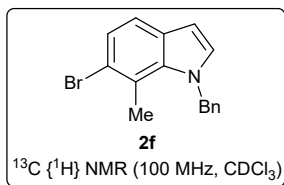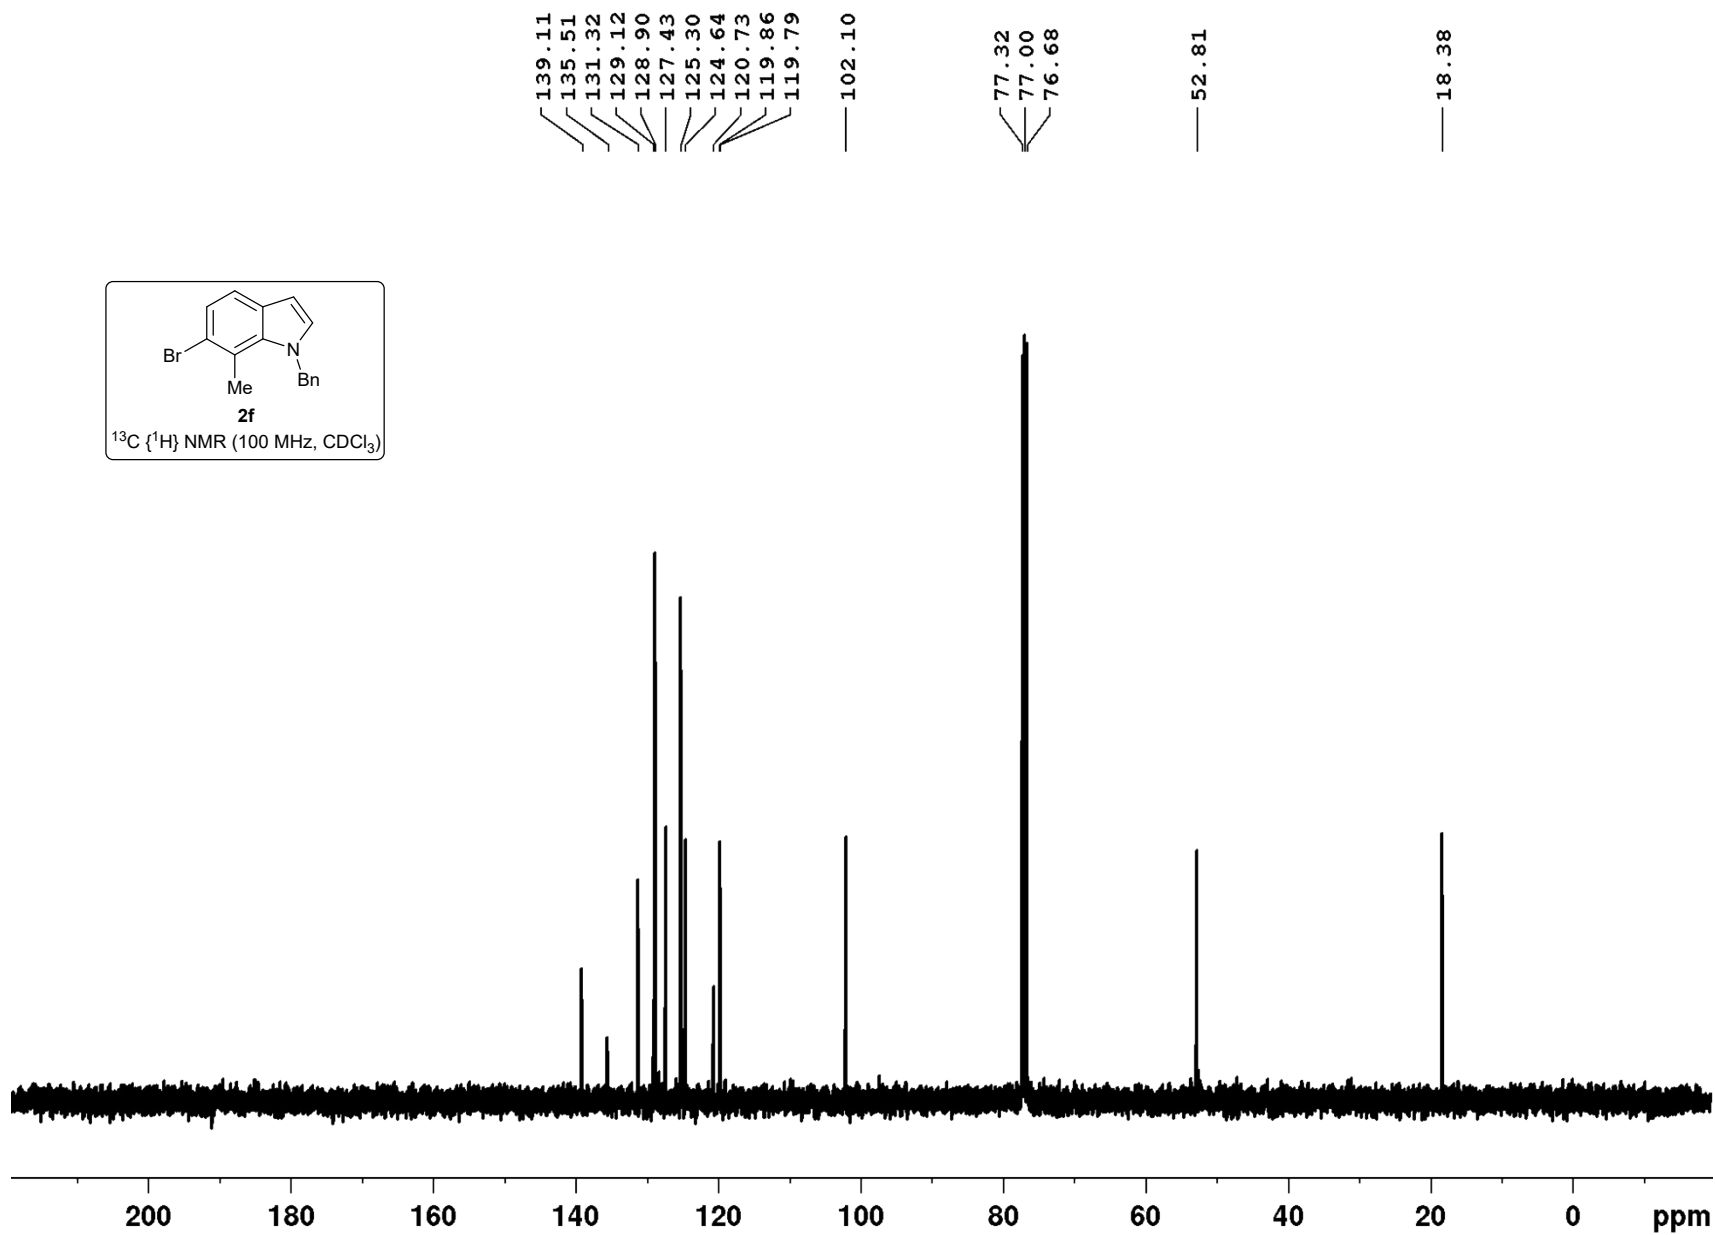

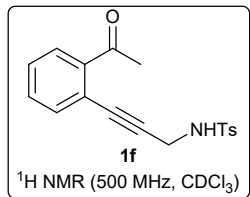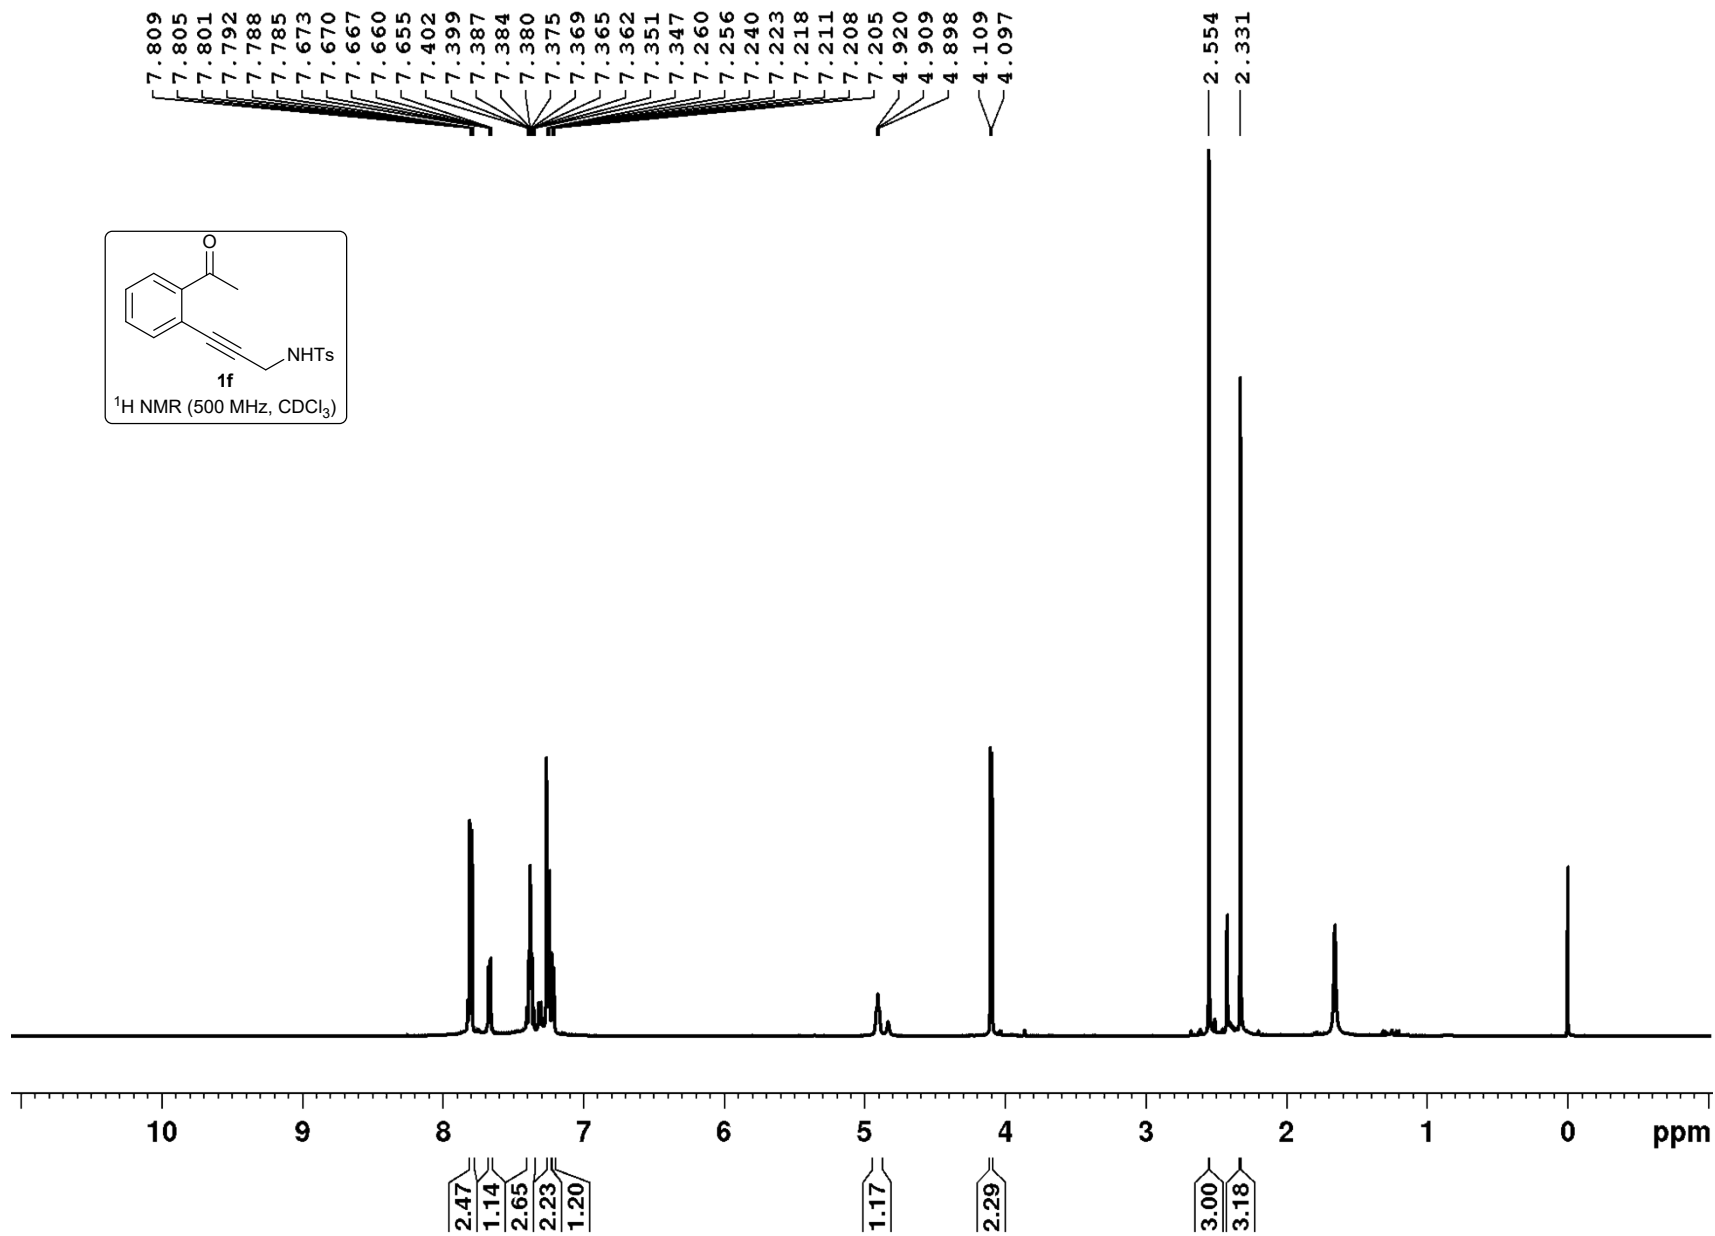

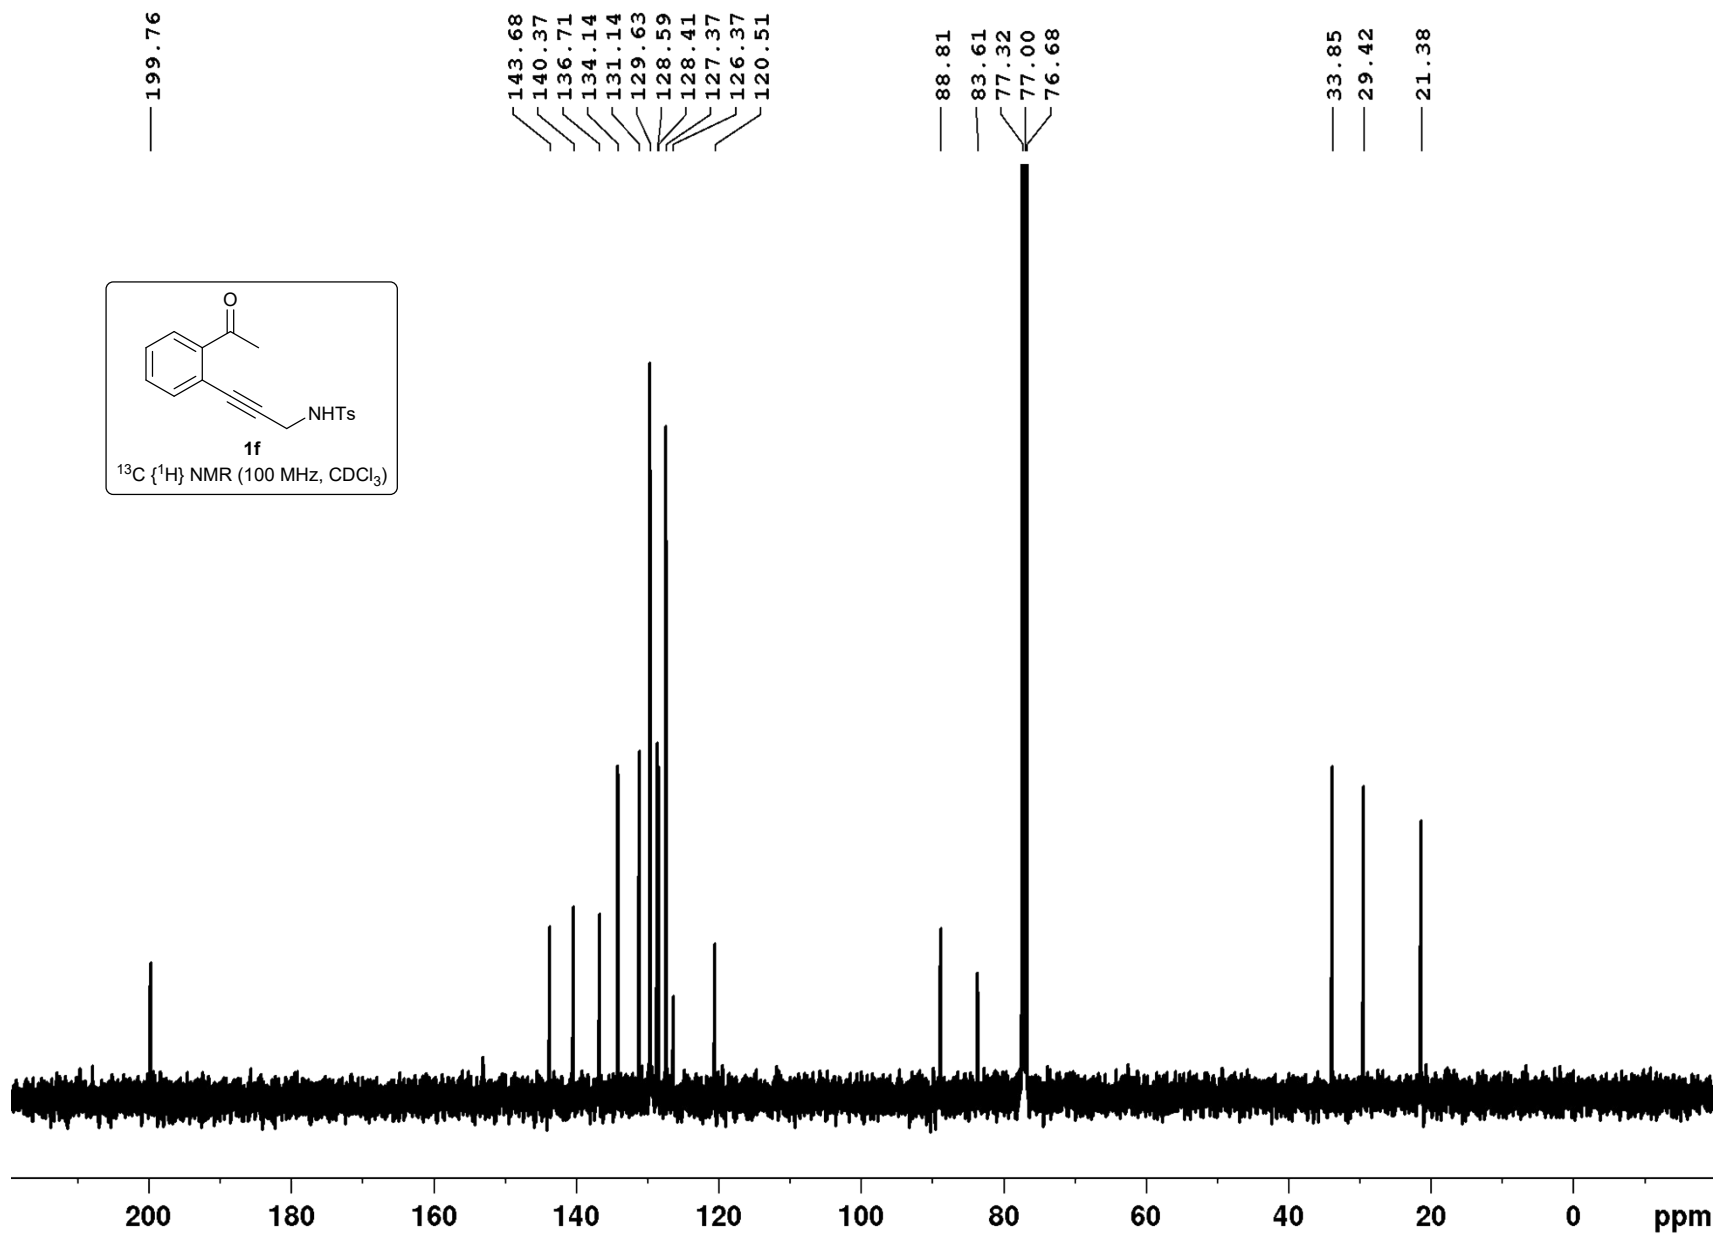



8.612  
8.608  
8.321  
8.316  
8.304  
8.299  
7.800  
7.783  
7.597  
7.591  
7.588  
7.580  
7.576  
7.572  
7.456  
7.453  
7.450  
7.448  
7.439  
7.437  
7.432  
7.429  
7.425  
7.424  
7.415  
7.412  
7.409  
7.400  
7.396  
7.394  
7.391  
7.260

2.839

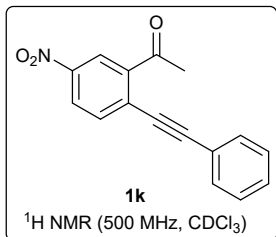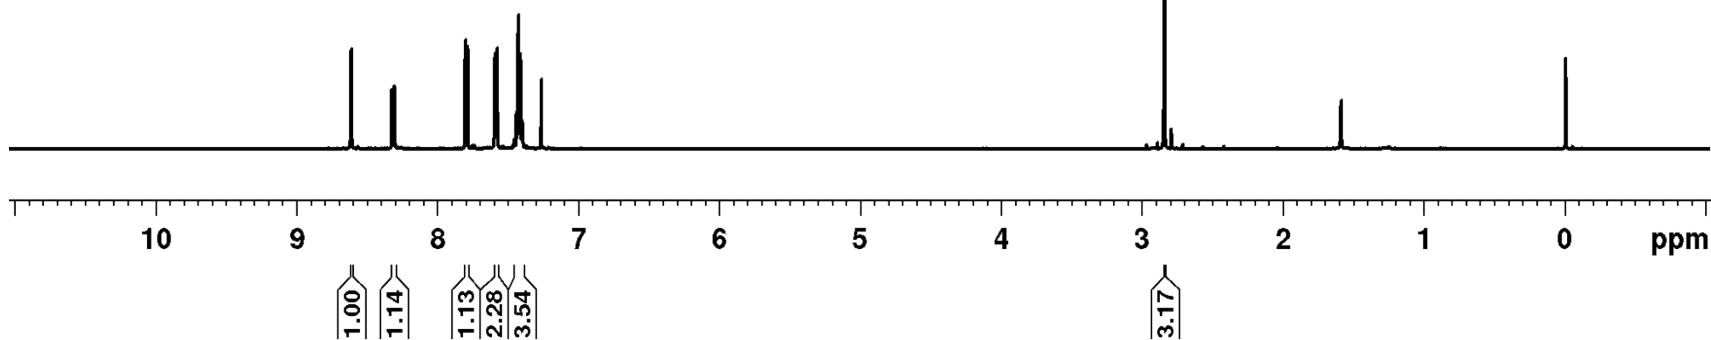

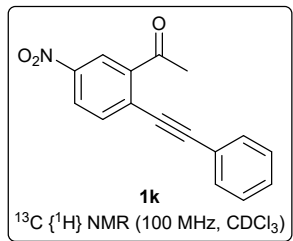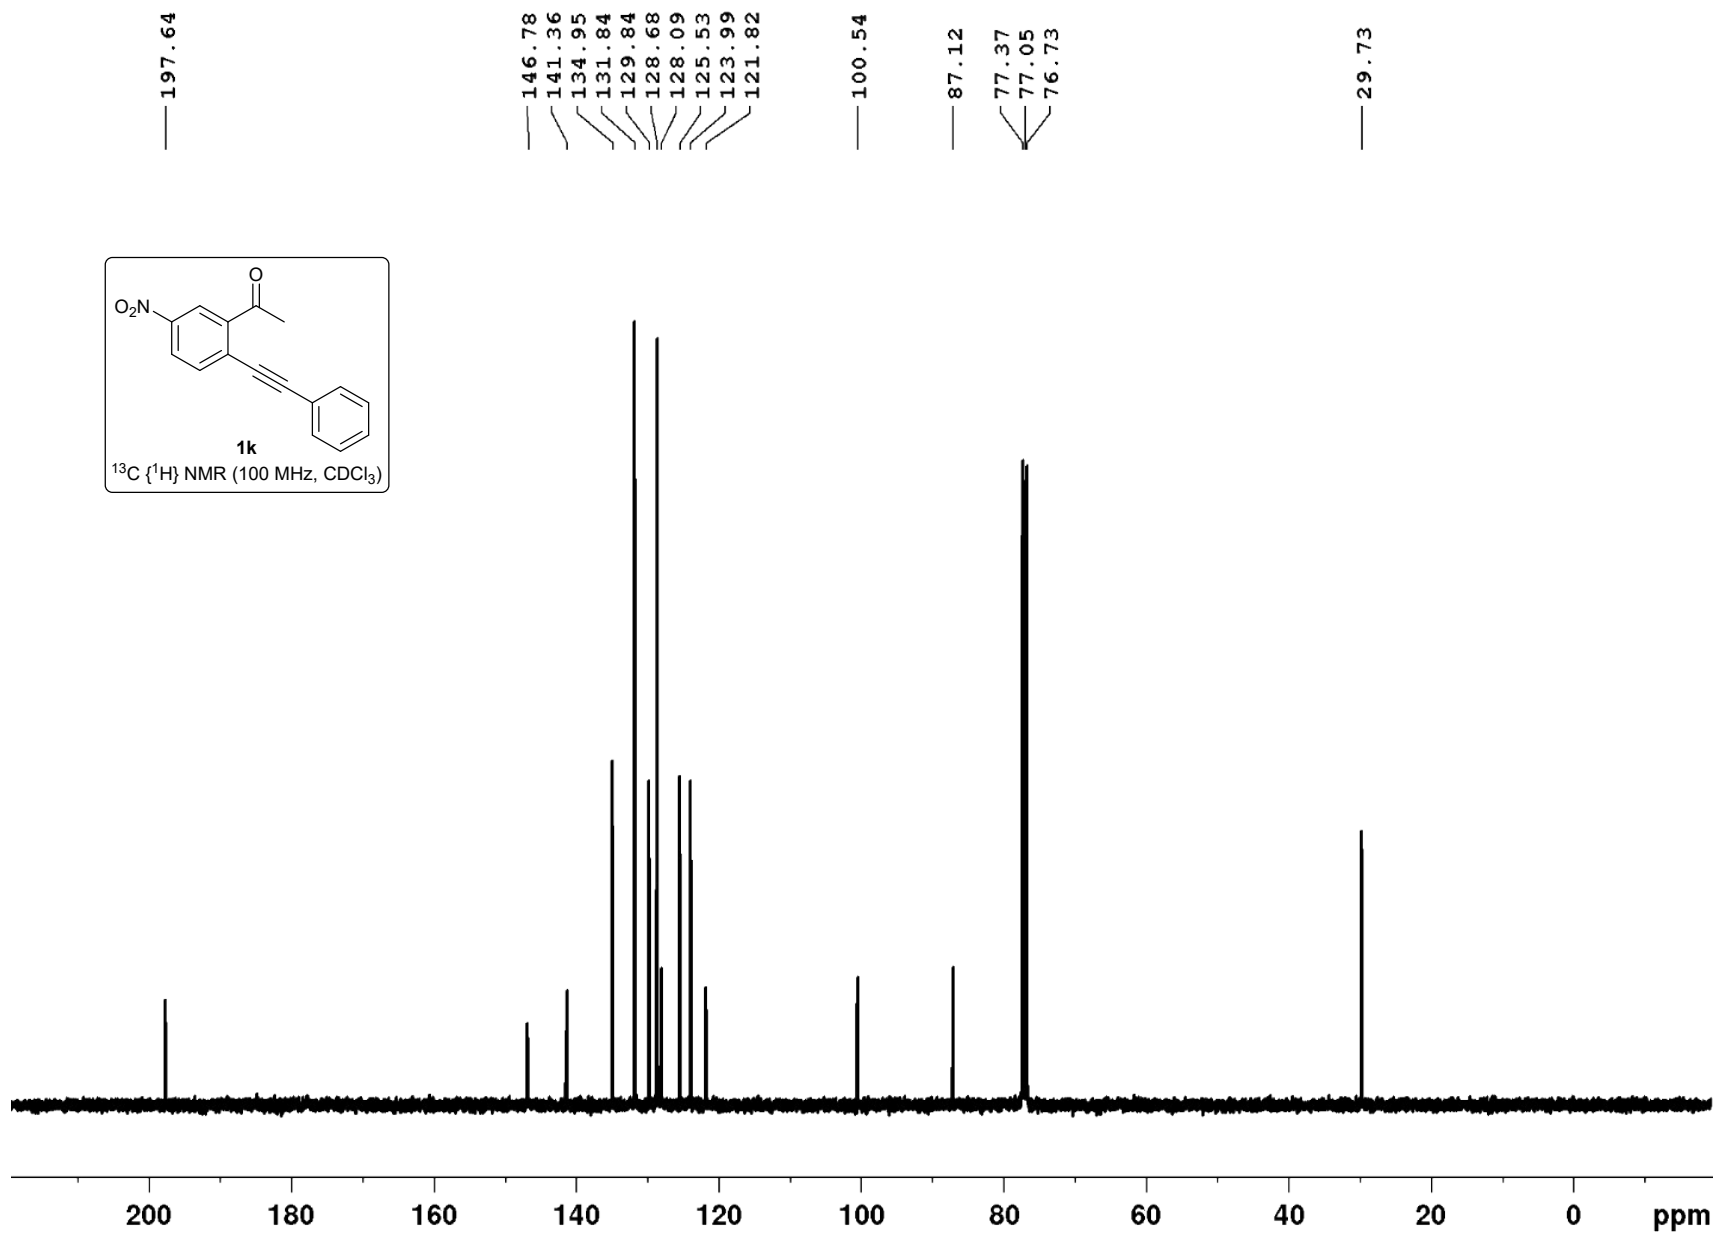

8.165  
8.148  
8.085  
8.007  
7.991  
7.938  
7.936  
7.936  
7.811  
7.810  
7.795  
7.626  
7.625  
7.610  
7.609  
7.559  
7.544  
7.529  
7.525  
7.510  
7.494  
7.452  
7.440  
7.423  
7.404  
7.389  
7.371  
7.356  
7.331  
7.316  
7.304  
7.290  
7.289  
7.274  
7.260  
7.184  
7.170  
7.168  
7.154  
5.461

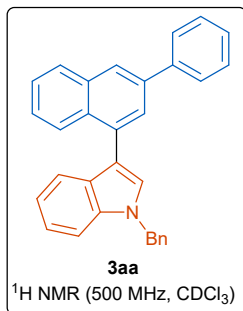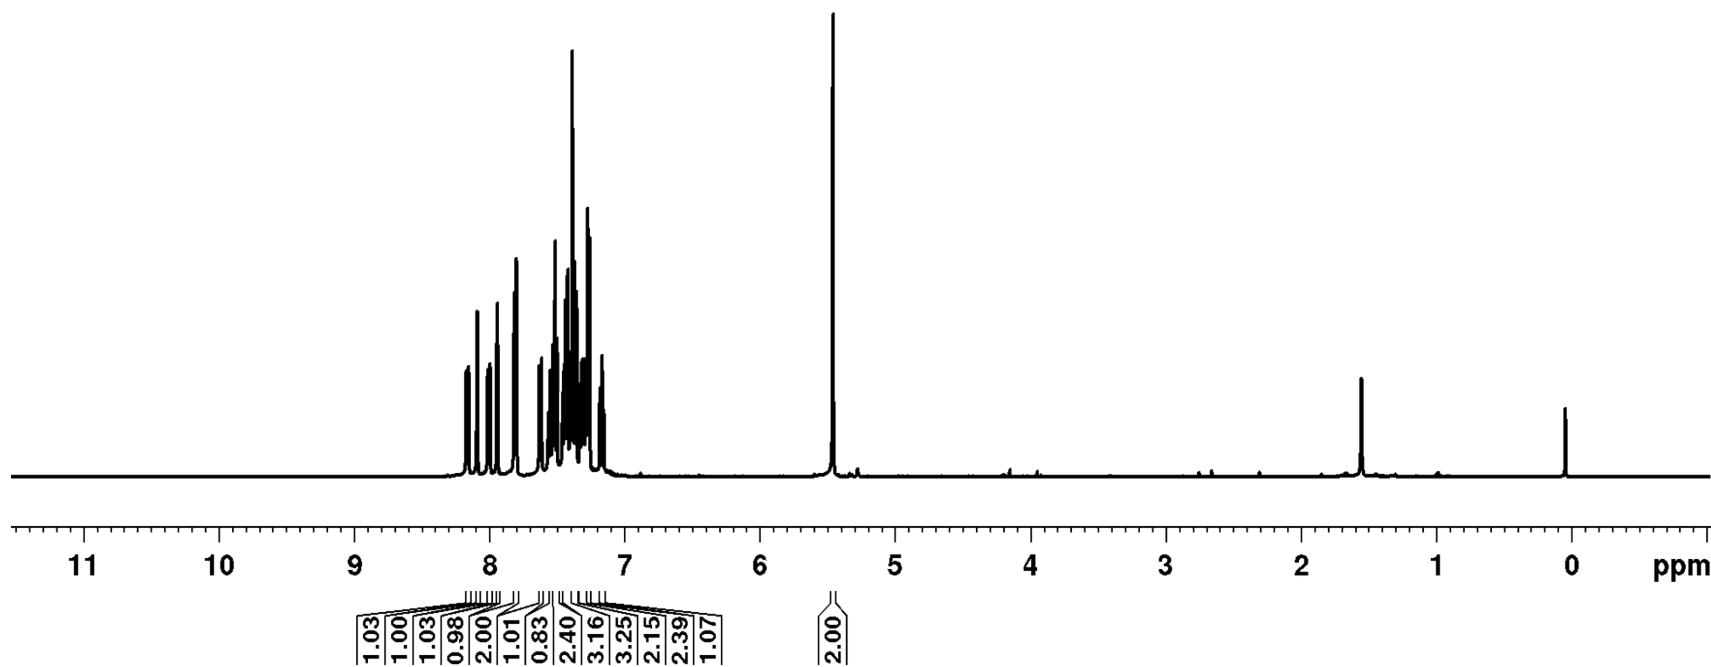

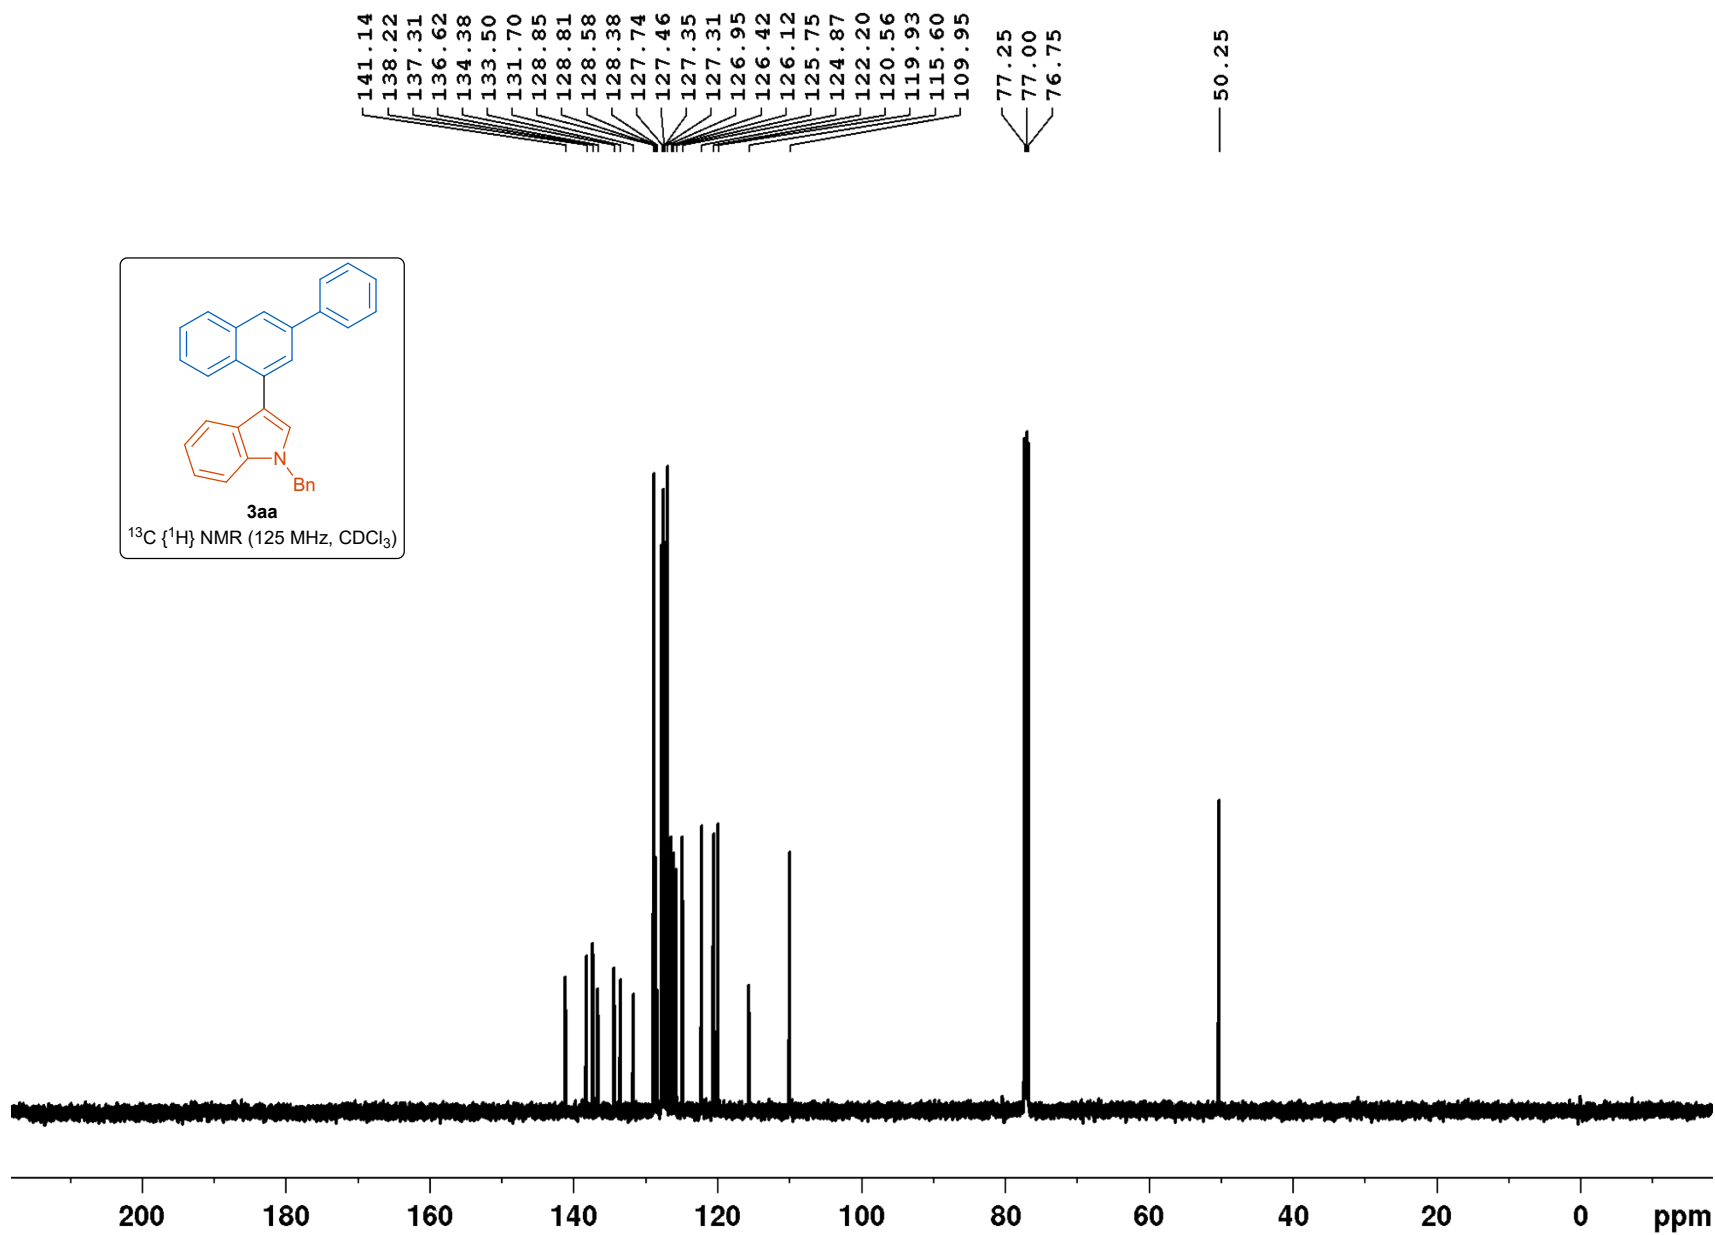

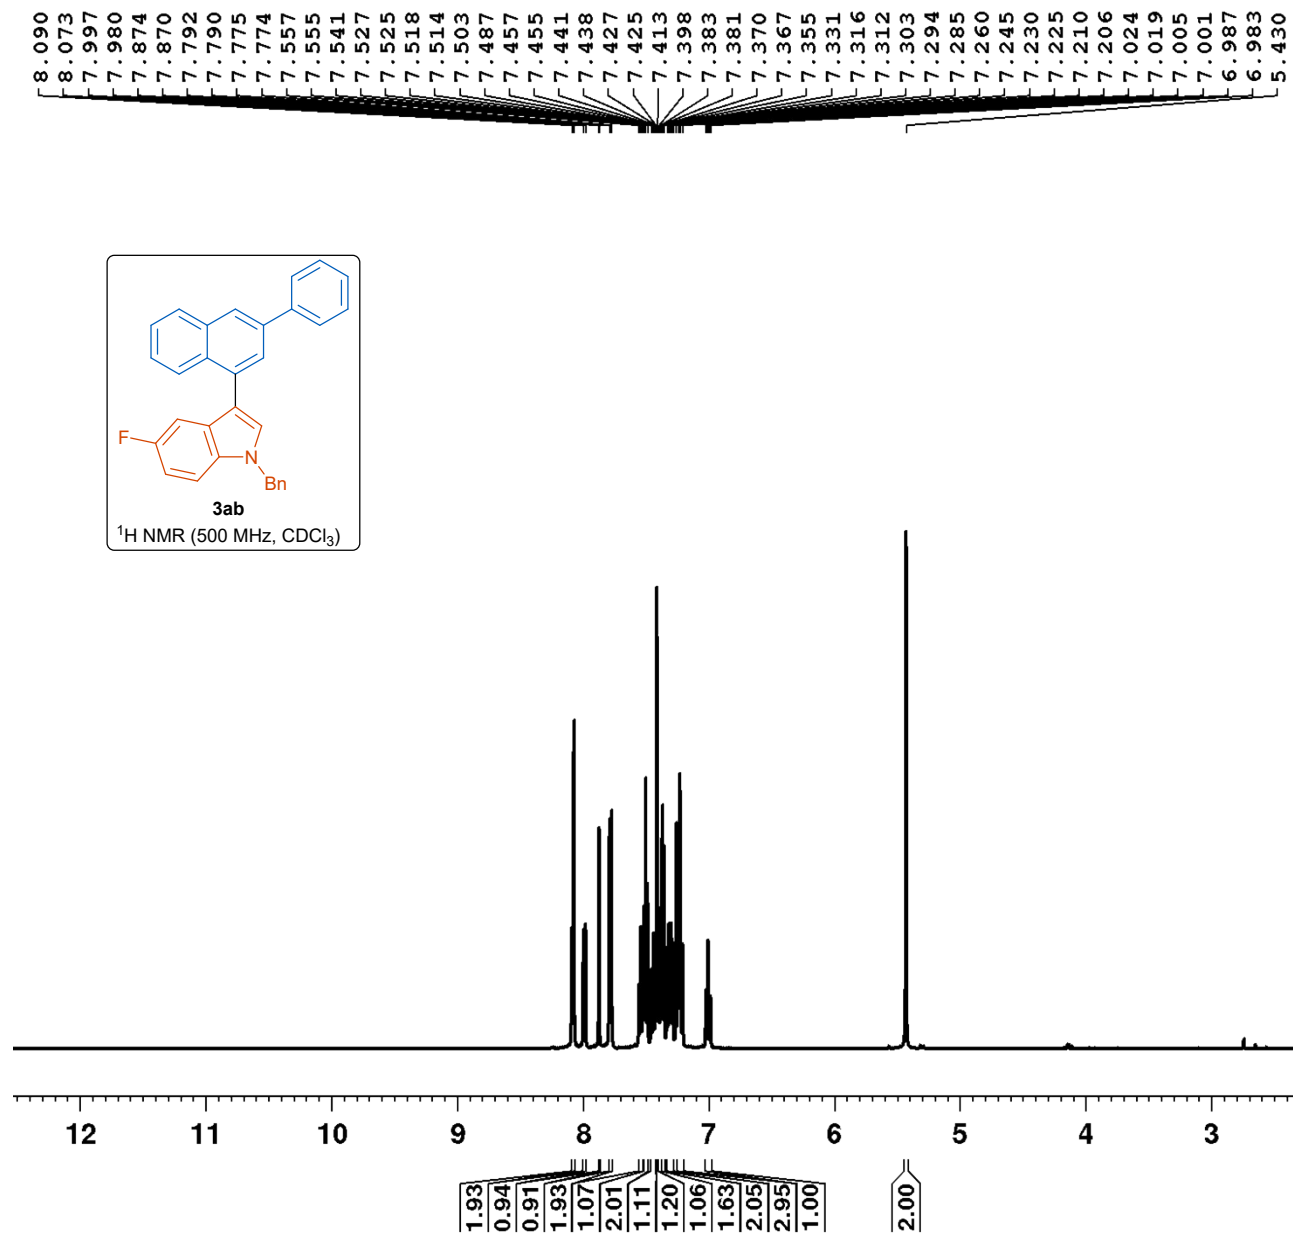

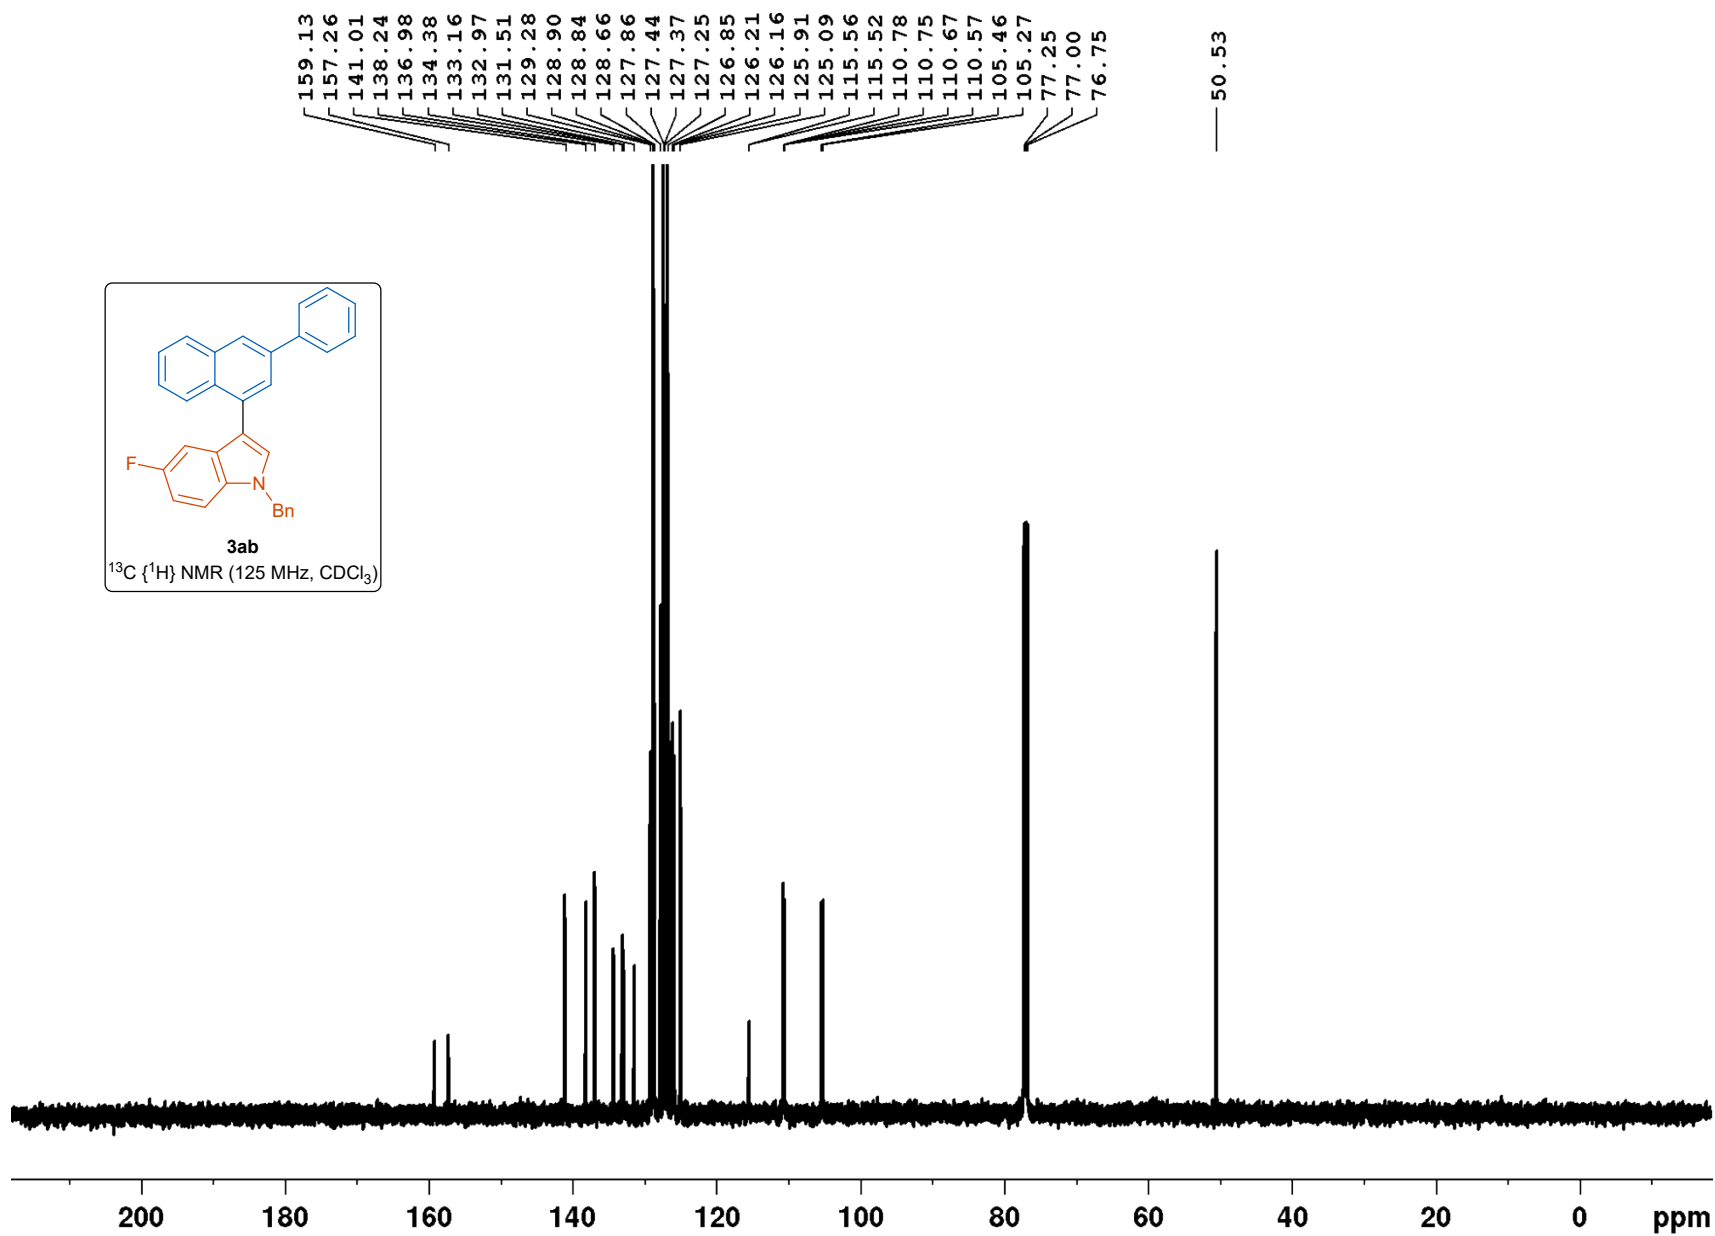

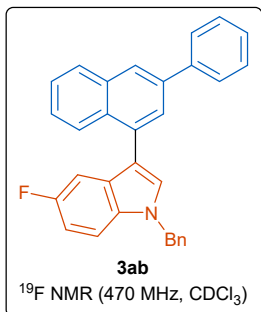

— -124.06

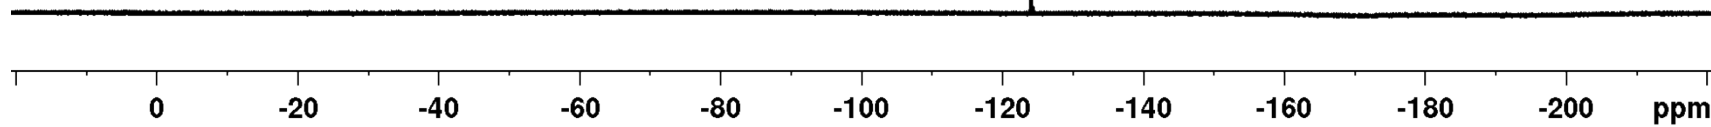

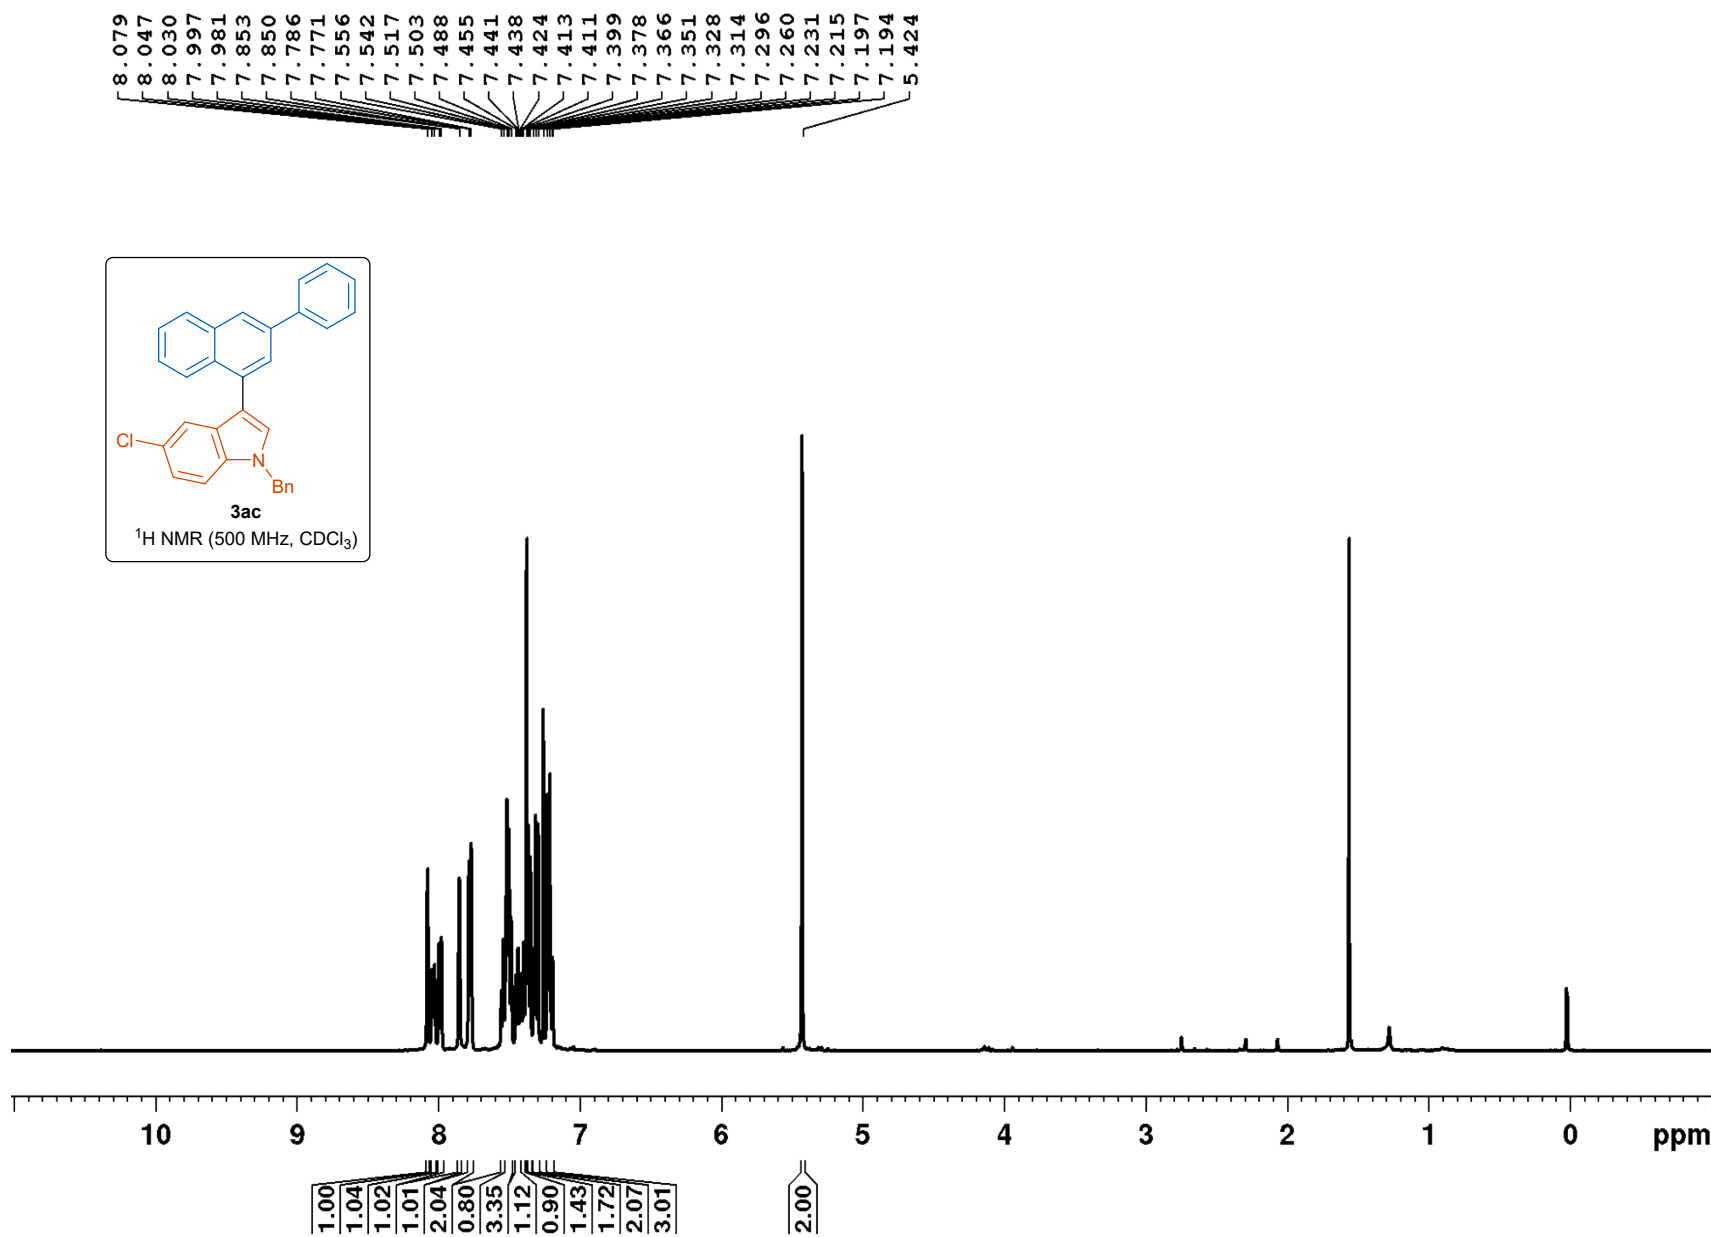



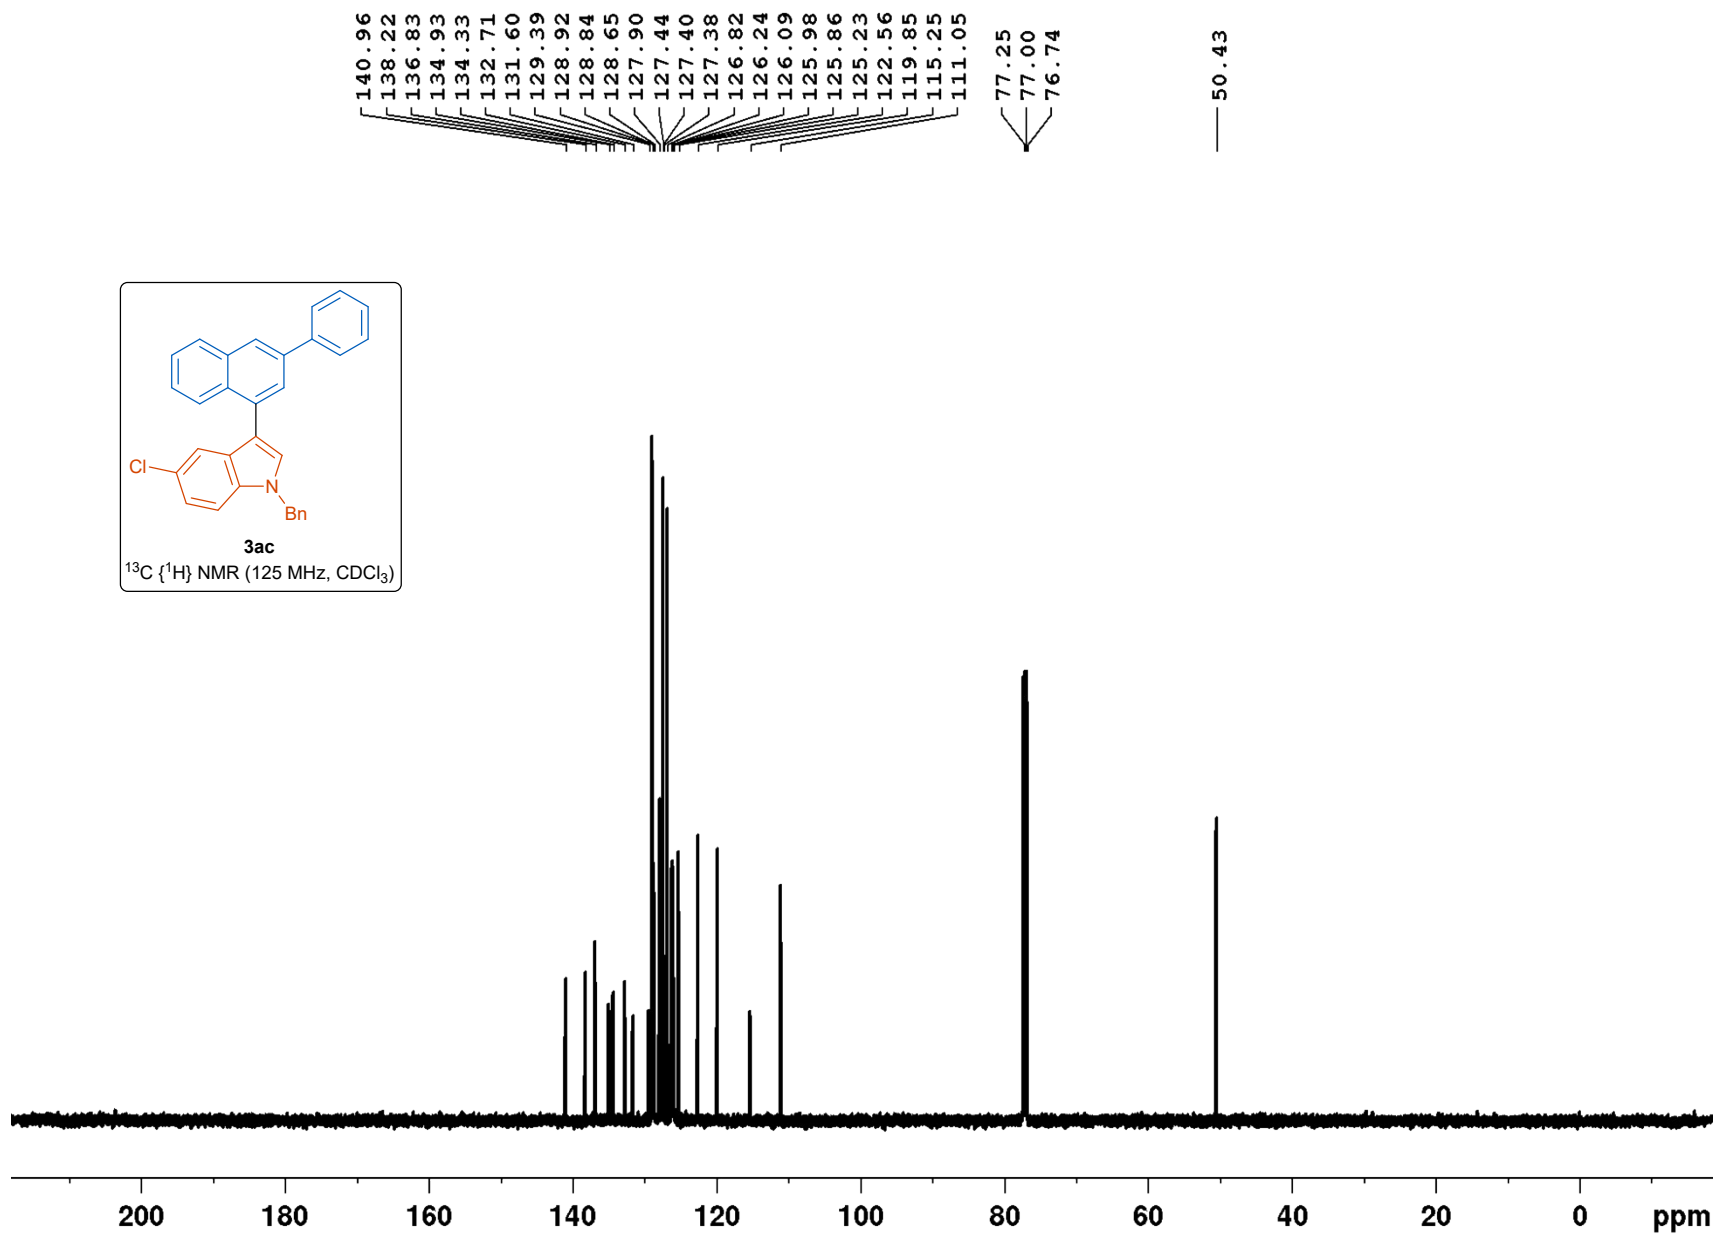

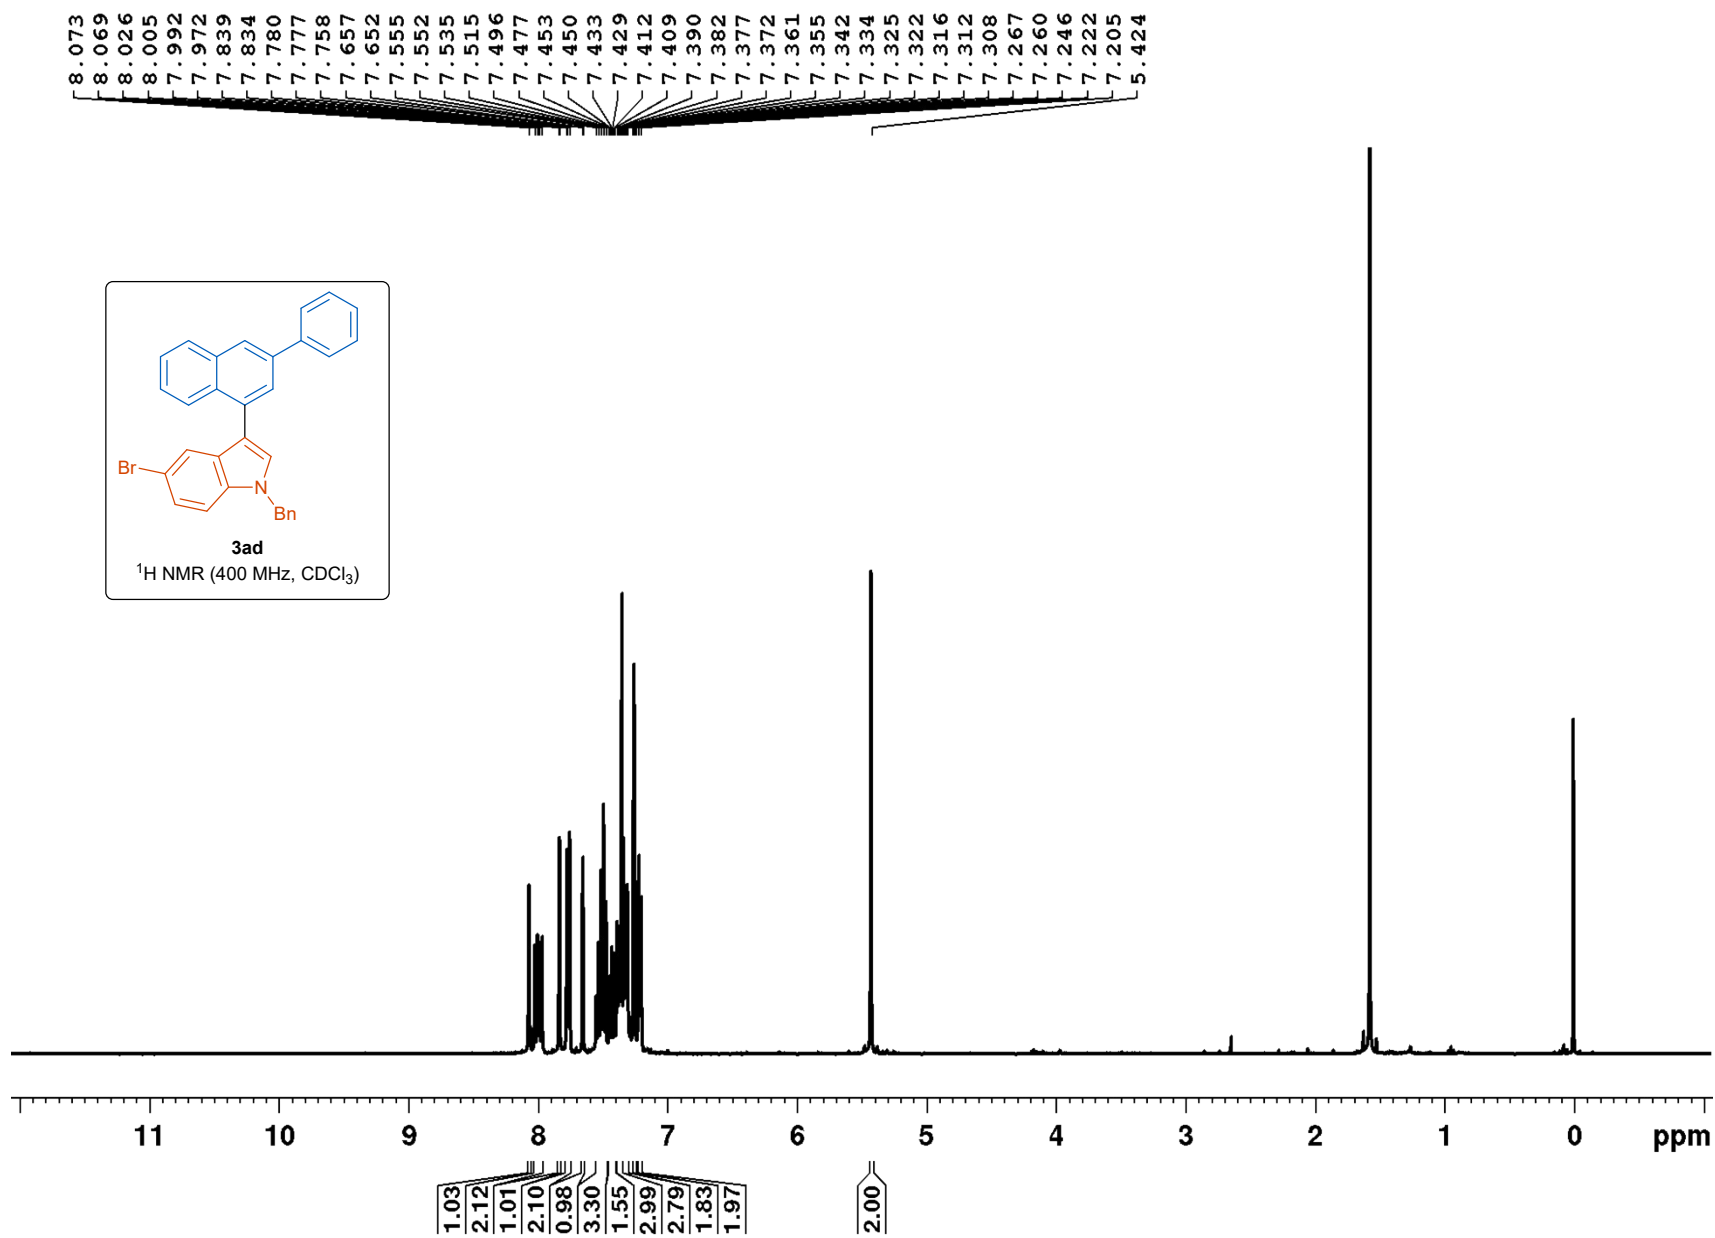

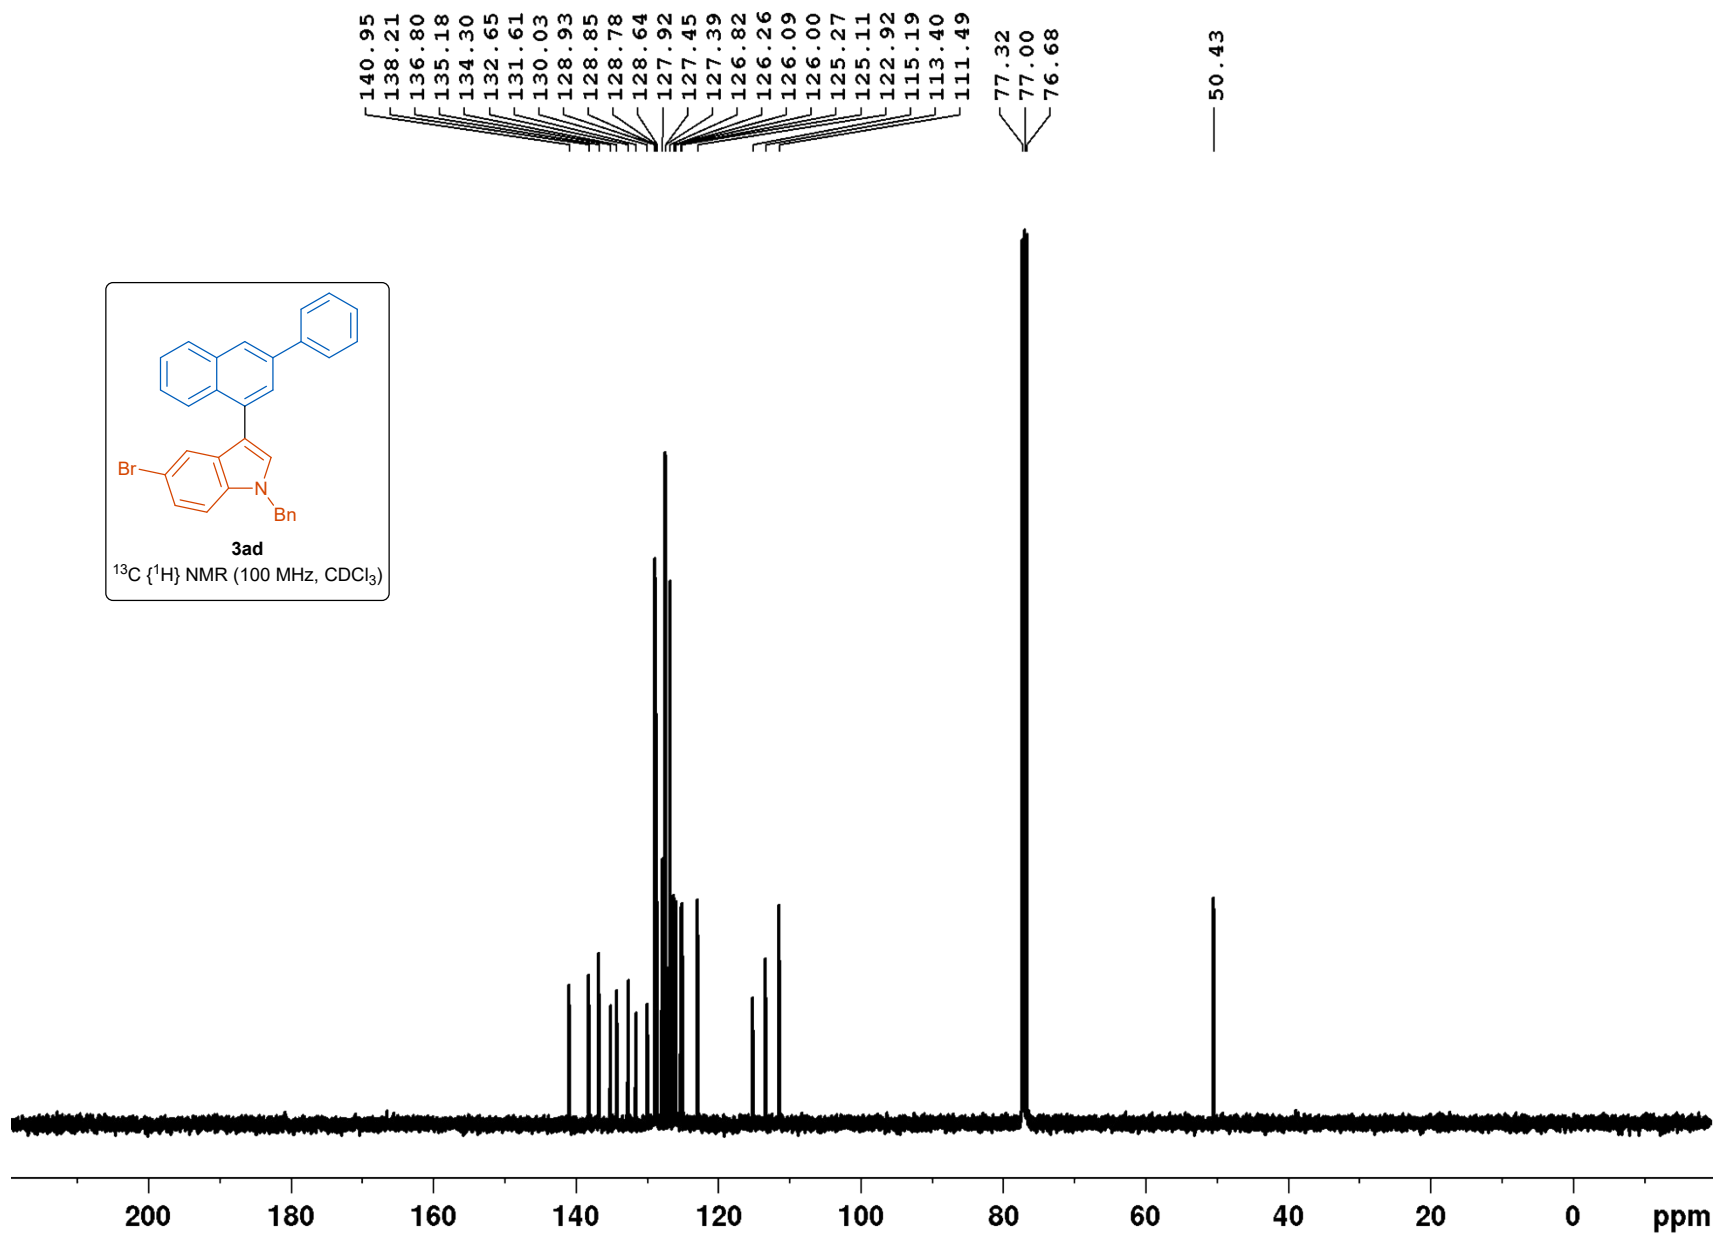

8.104  
8.067  
8.064  
7.990  
7.974  
7.893  
7.889  
7.790  
7.787  
7.783  
7.773  
7.771  
7.544  
7.541  
7.530  
7.528  
7.525  
7.514  
7.511  
7.506  
7.503  
7.492  
7.479  
7.476  
7.440  
7.437  
7.426  
7.423  
7.420  
7.409  
7.406  
7.403  
7.401  
7.398  
7.389  
7.386  
7.382  
7.373  
7.371  
7.368  
7.366  
7.364  
7.361  
7.350  
7.347  
7.340  
7.335  
7.308  
7.305  
7.298  
7.293  
7.288  
7.282  
7.279  
7.270  
7.260  
7.243  
7.240  
7.226  
6.986  
6.982  
6.923  
6.918  
6.905  
6.900  
5.416  
3.715

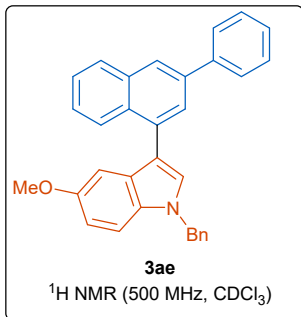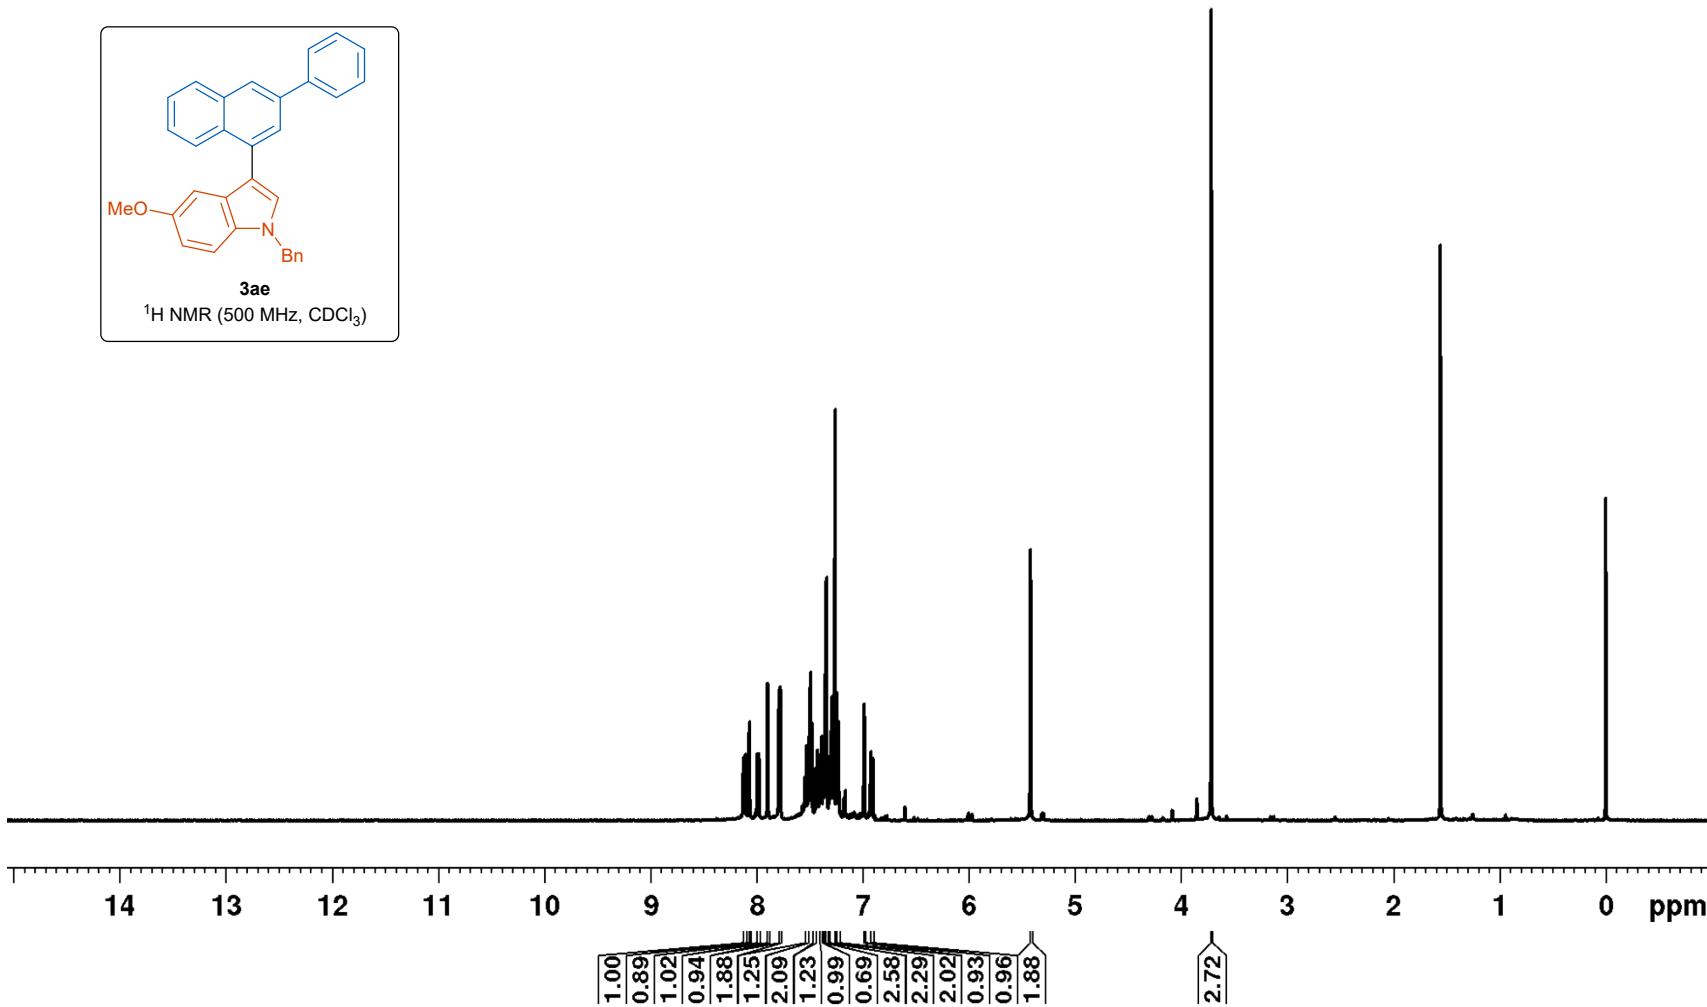

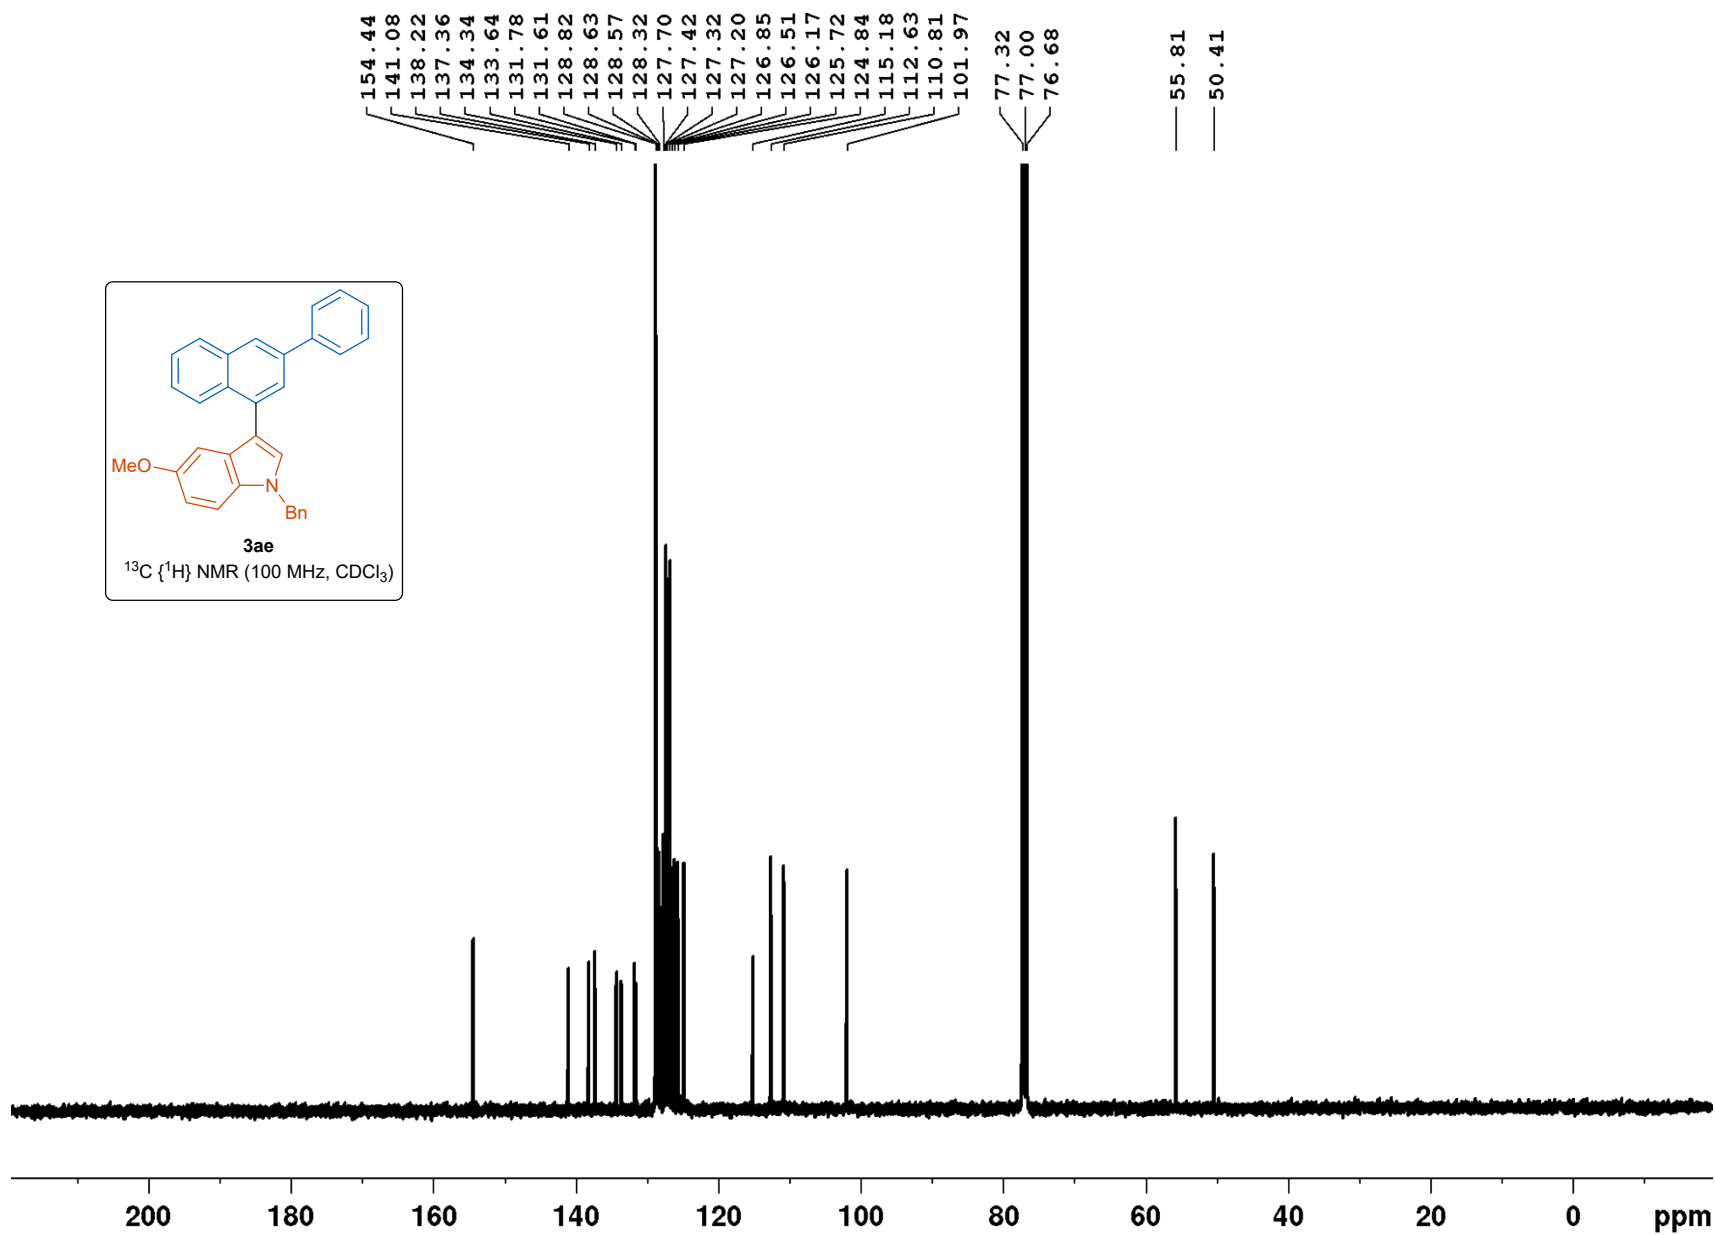

8.066  
8.028  
8.011  
7.983  
7.966  
7.856  
7.852  
7.778  
7.775  
7.771  
7.761  
7.759  
7.755  
7.539  
7.537  
7.525  
7.523  
7.520  
7.509  
7.507  
7.504  
7.500  
7.489  
7.477  
7.473  
7.470  
7.429  
7.427  
7.416  
7.413  
7.410  
7.401  
7.399  
7.396  
7.387  
7.384  
7.381  
7.369  
7.367  
7.364  
7.357  
7.353  
7.351  
7.341  
7.338  
7.334  
7.316  
7.305  
7.302  
7.299  
7.290  
7.287  
7.260  
7.226  
7.225  
7.209  
7.208  
7.061  
7.047  
5.700  
2.697

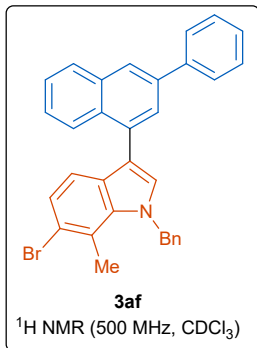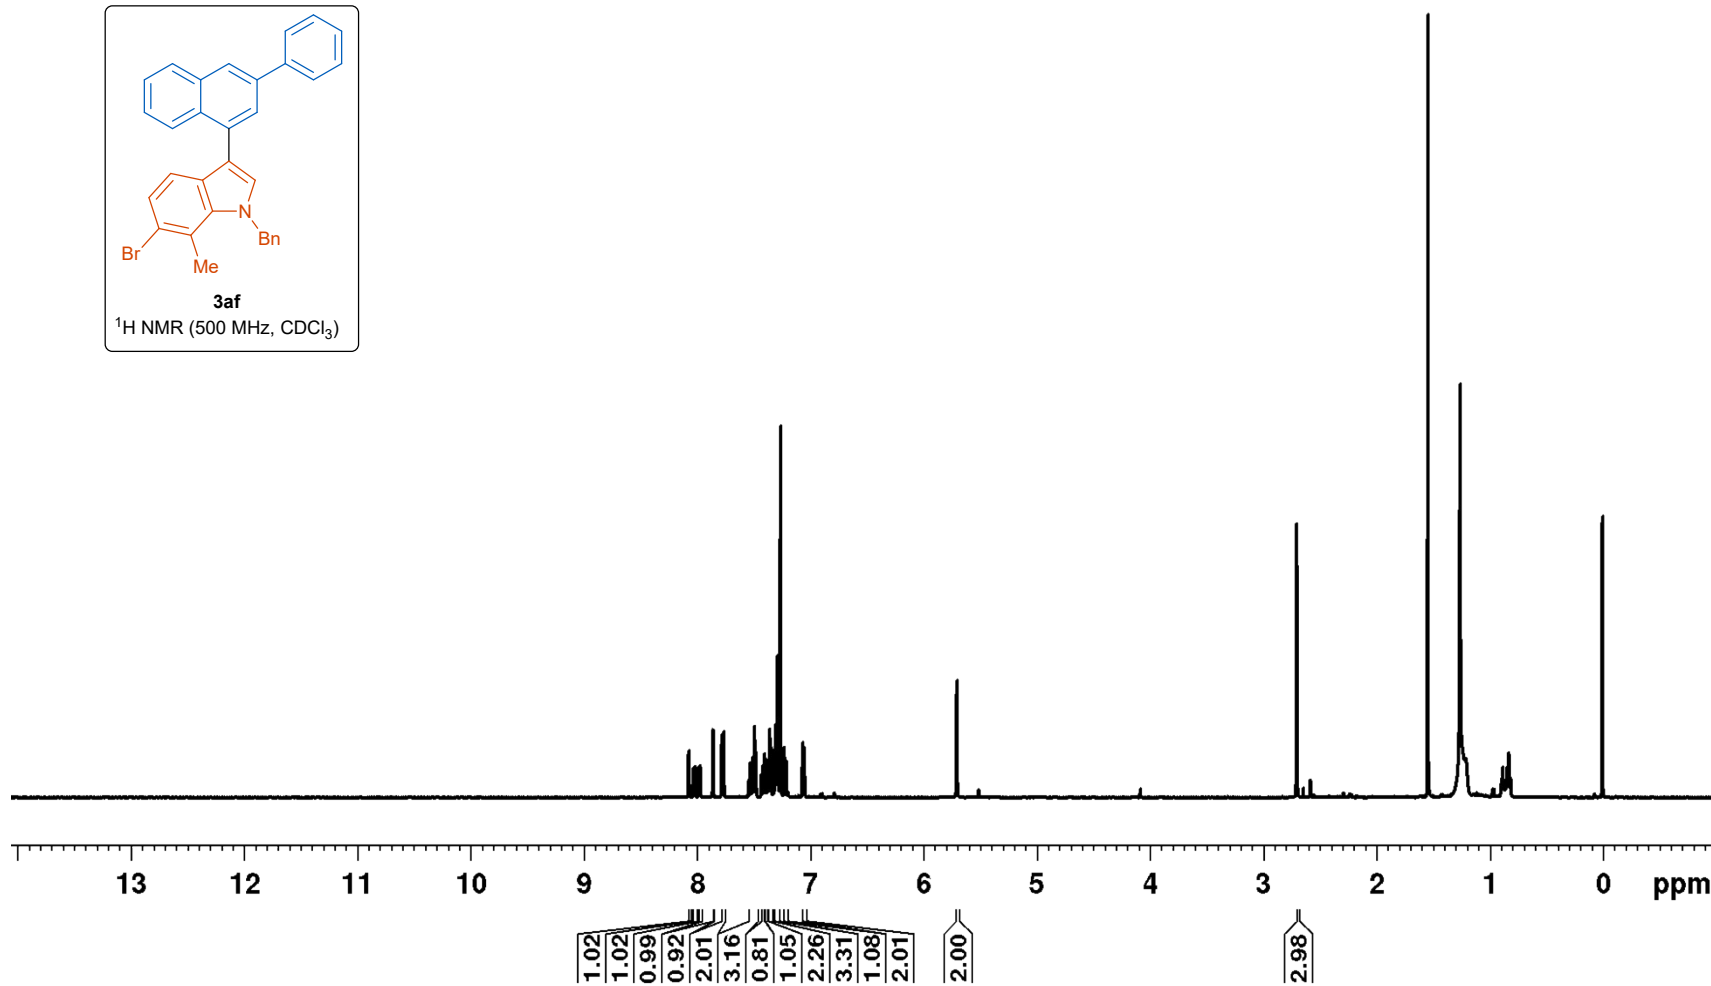

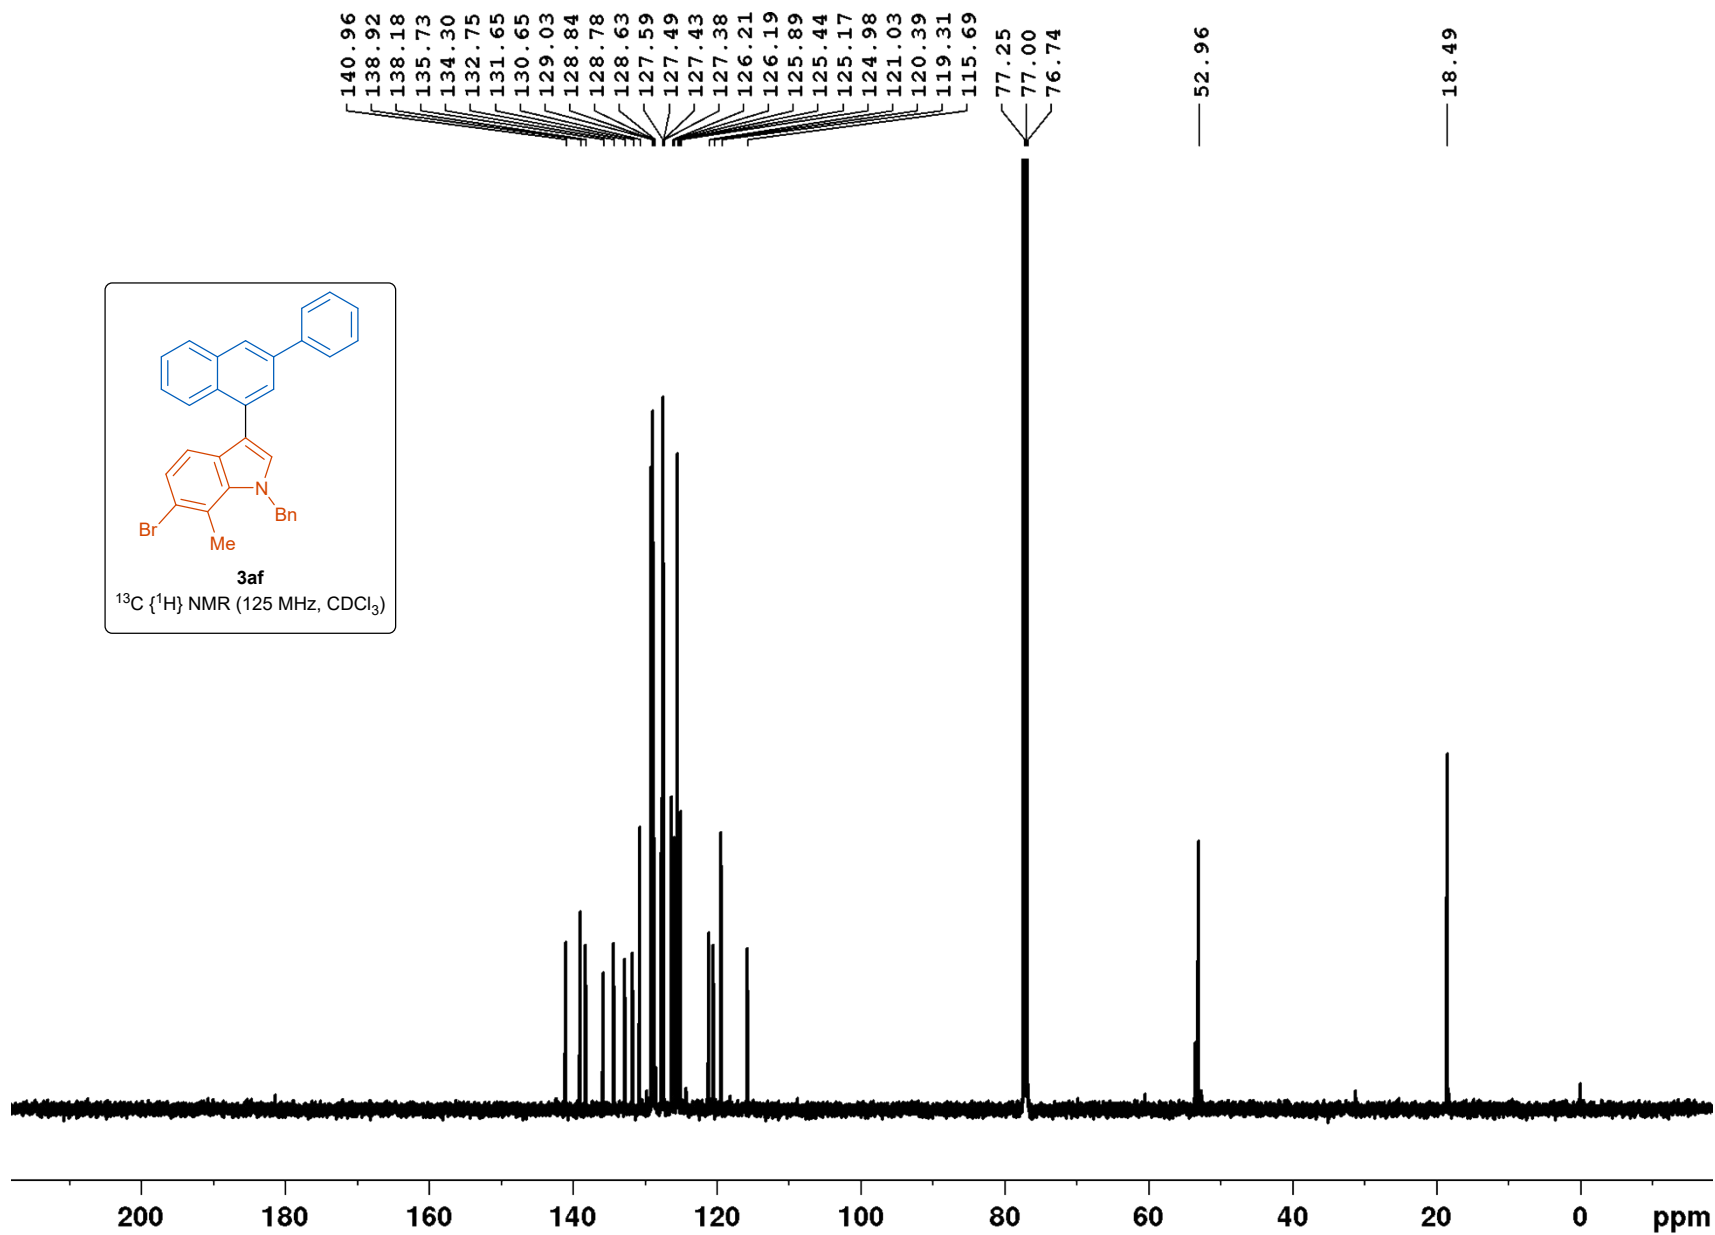

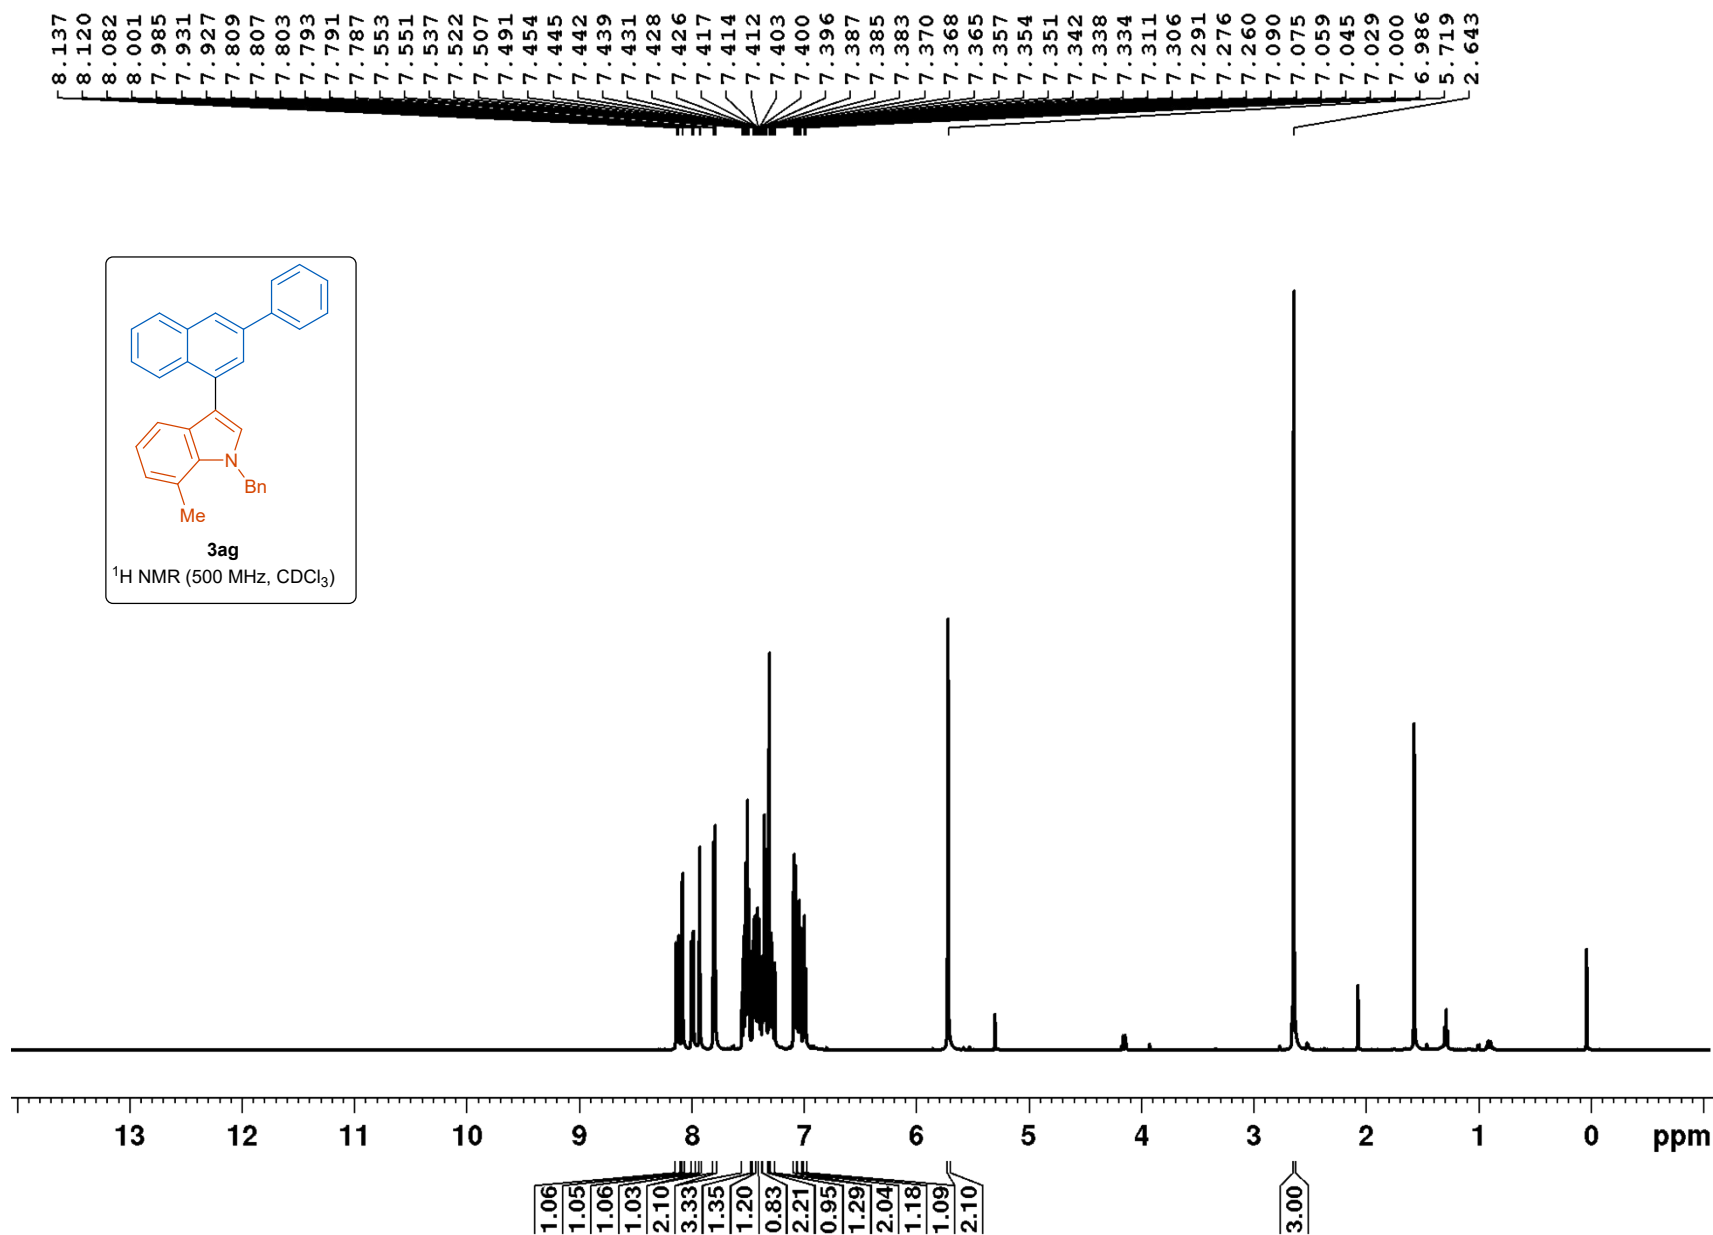



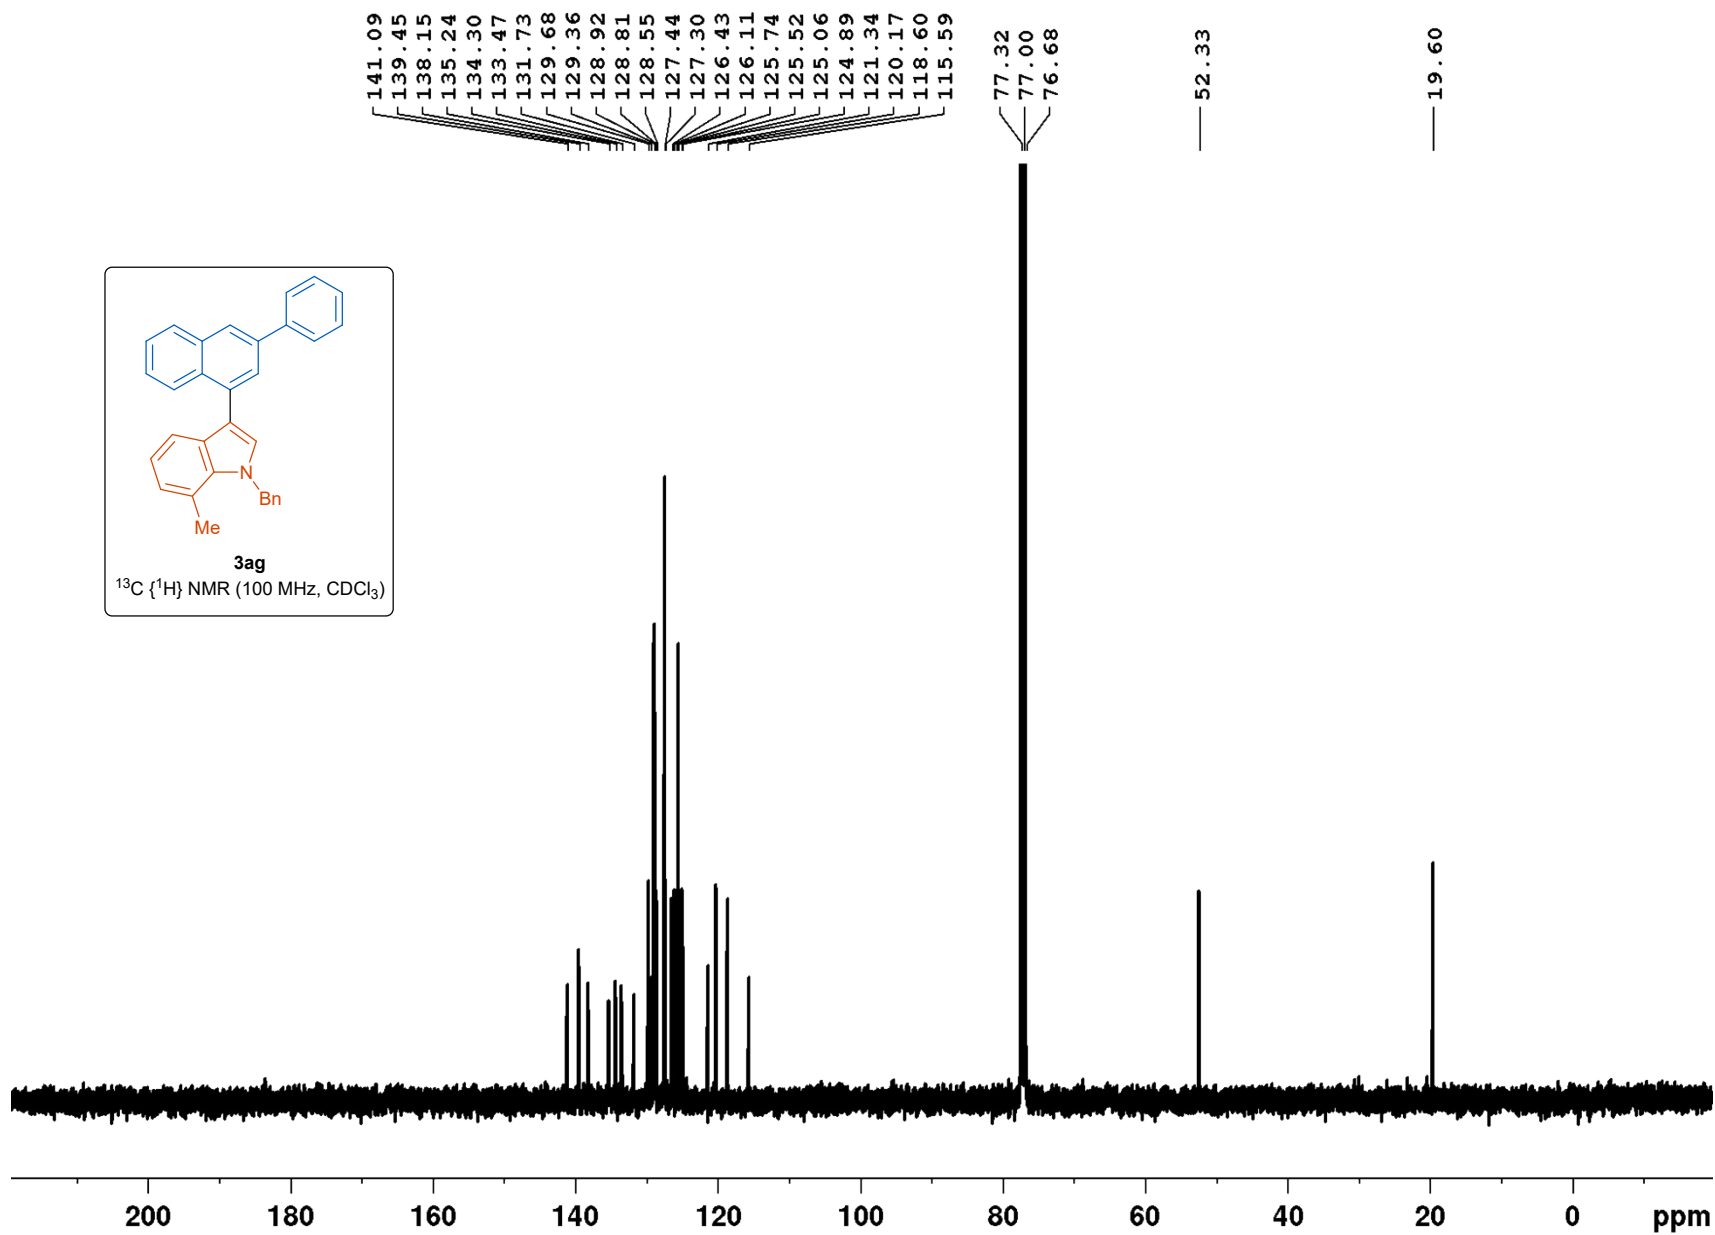

8.152  
8.131  
8.068  
7.998  
7.978  
7.904  
7.900  
7.802  
7.799  
7.781  
7.780  
7.591  
7.571  
7.552  
7.550  
7.533  
7.518  
7.499  
7.480  
7.470  
7.449  
7.442  
7.439  
7.421  
7.418  
7.411  
7.404  
7.401  
7.397  
7.392  
7.374  
7.351  
7.350  
7.332  
7.311  
7.260  
7.175  
7.173  
7.156  
7.138  
7.136  
3.939

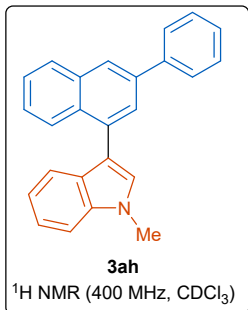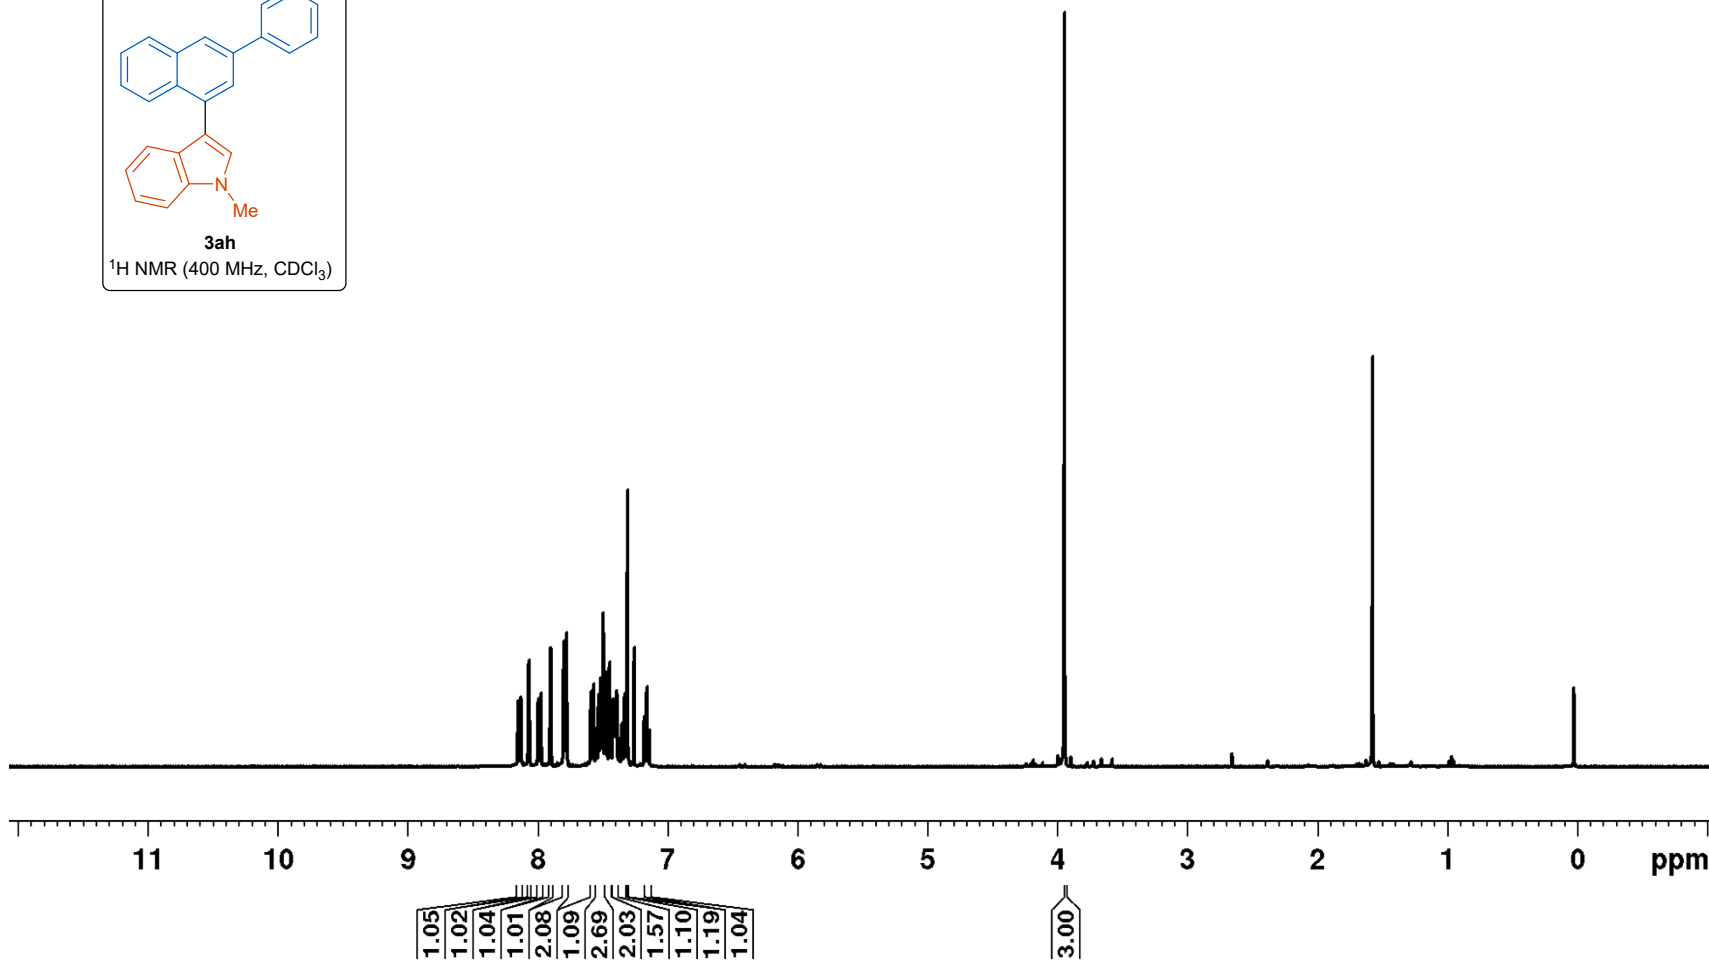

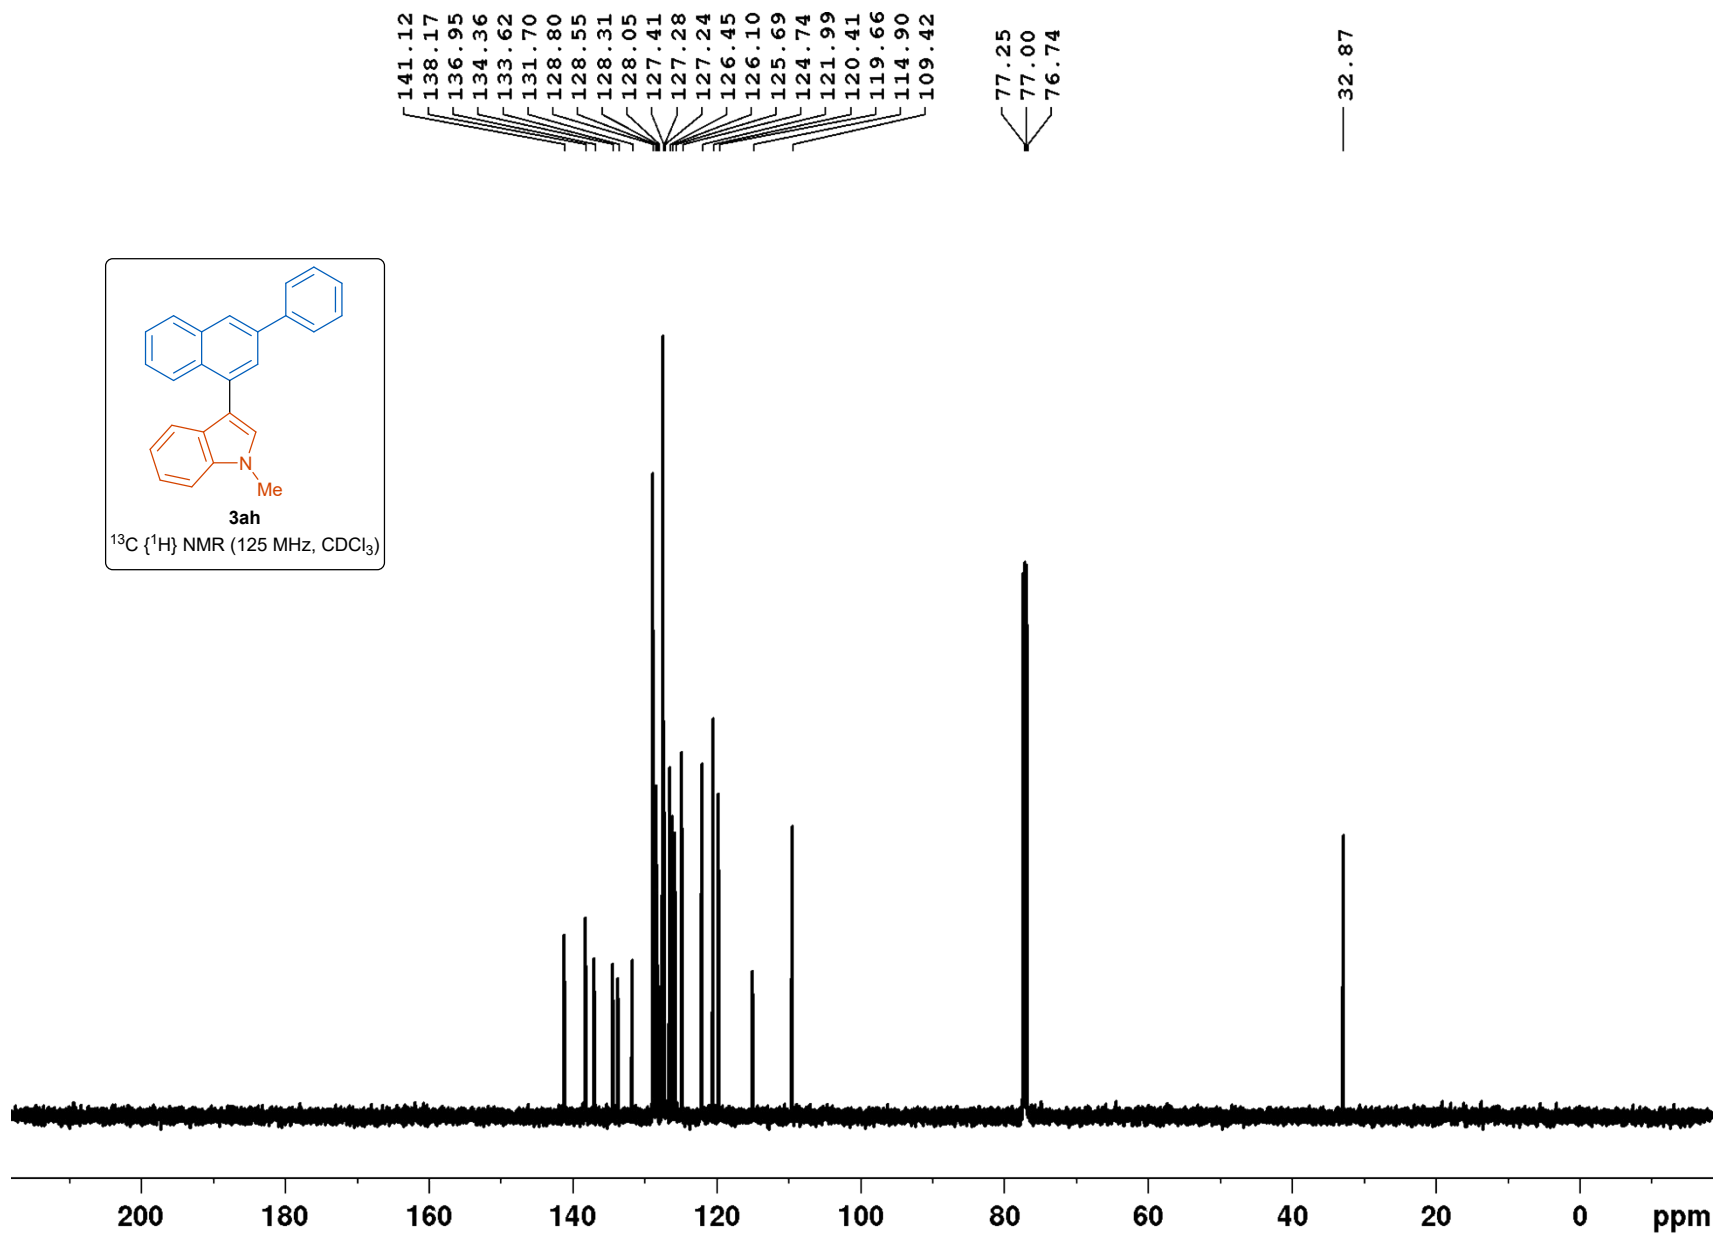

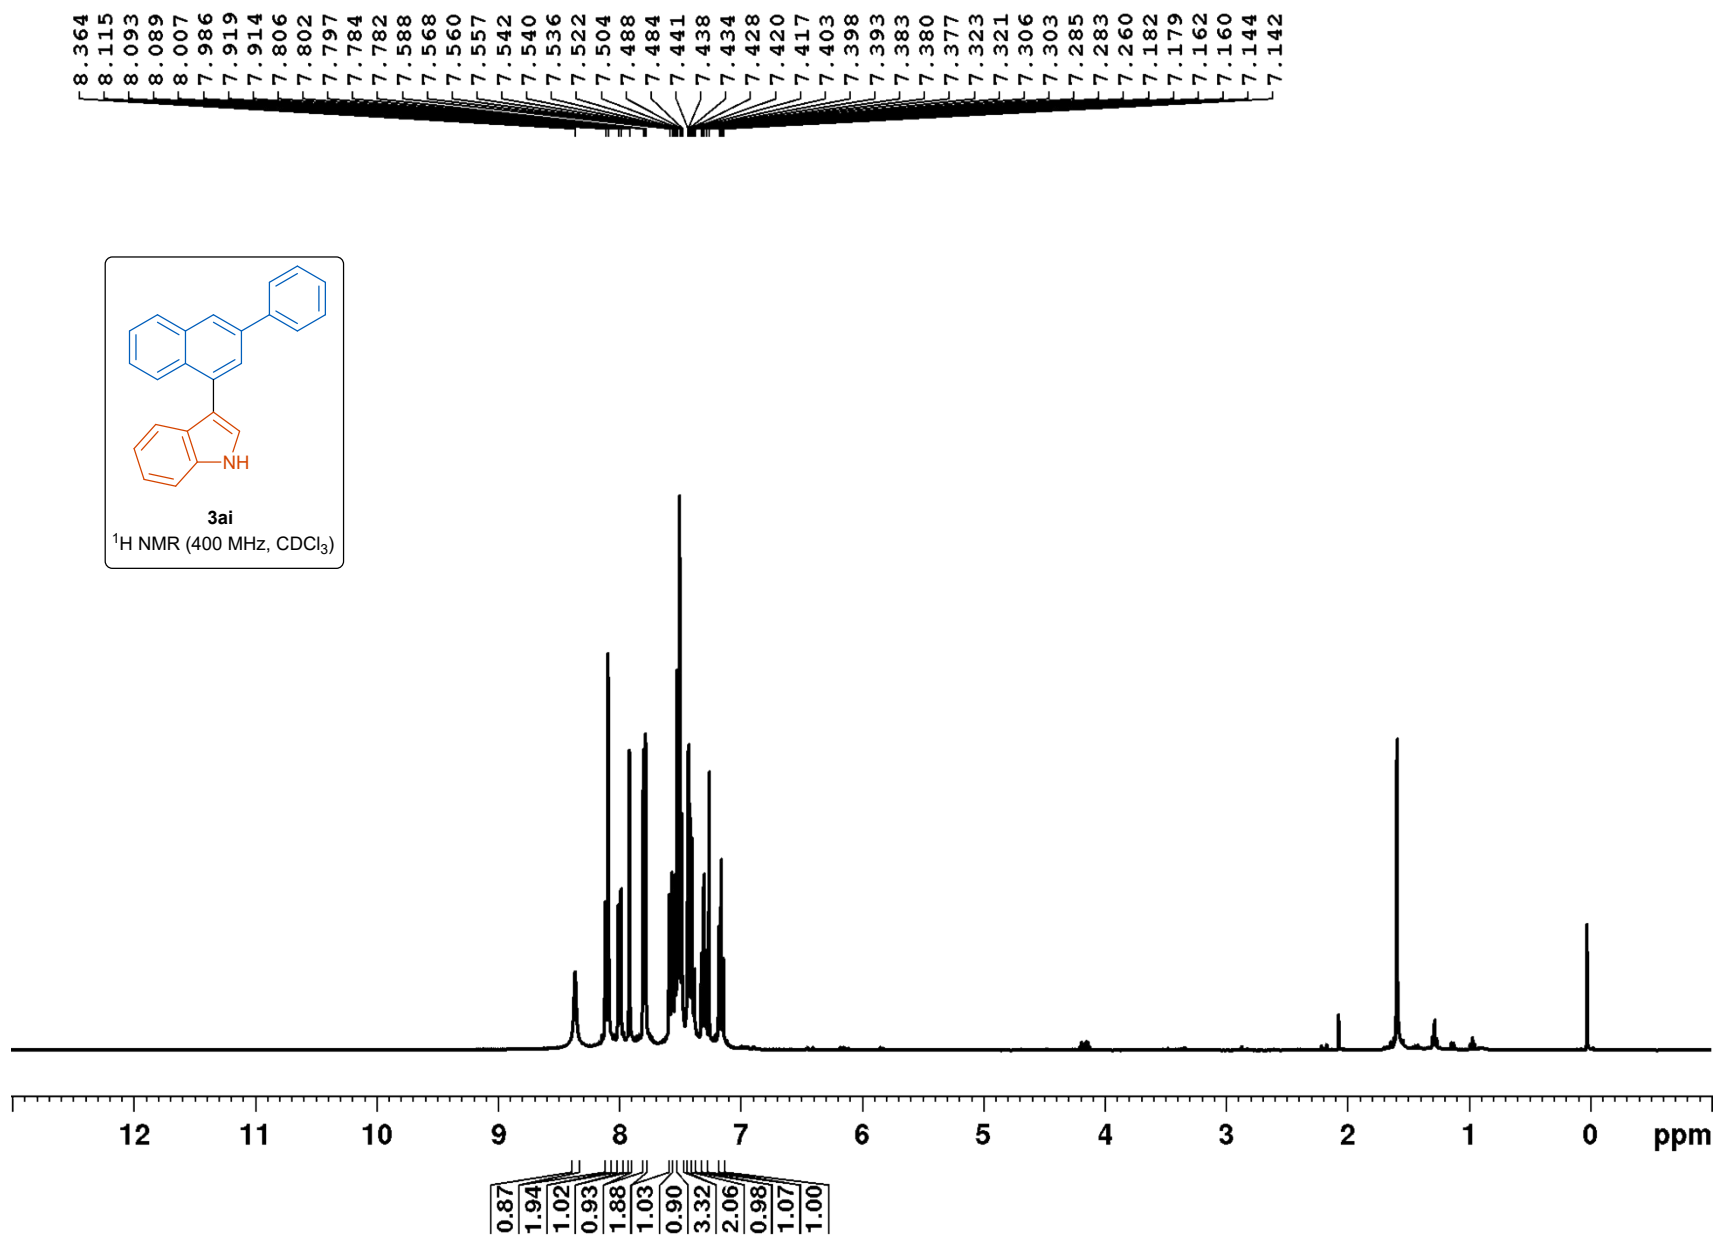

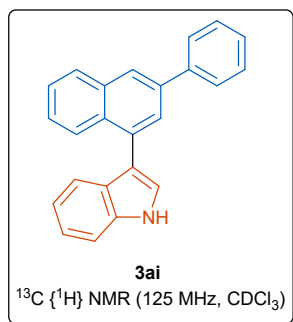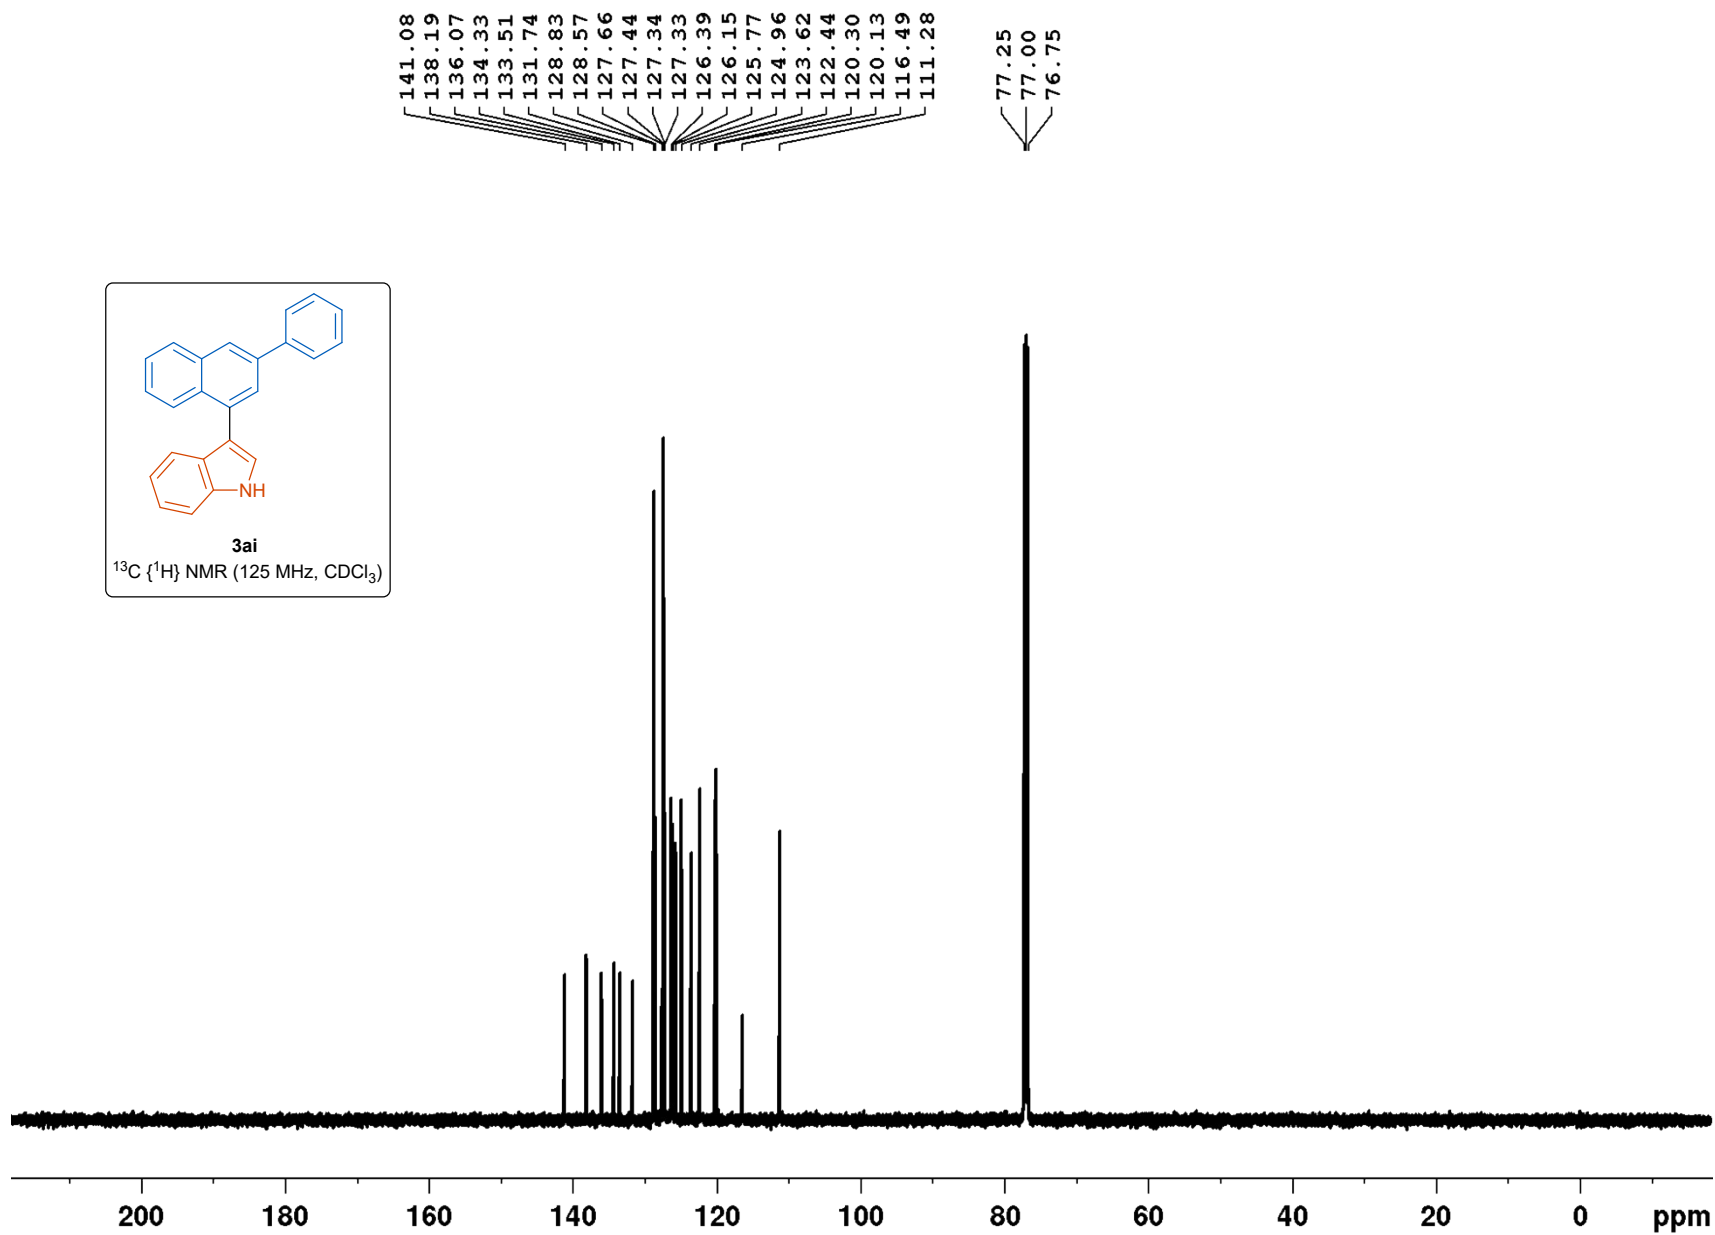

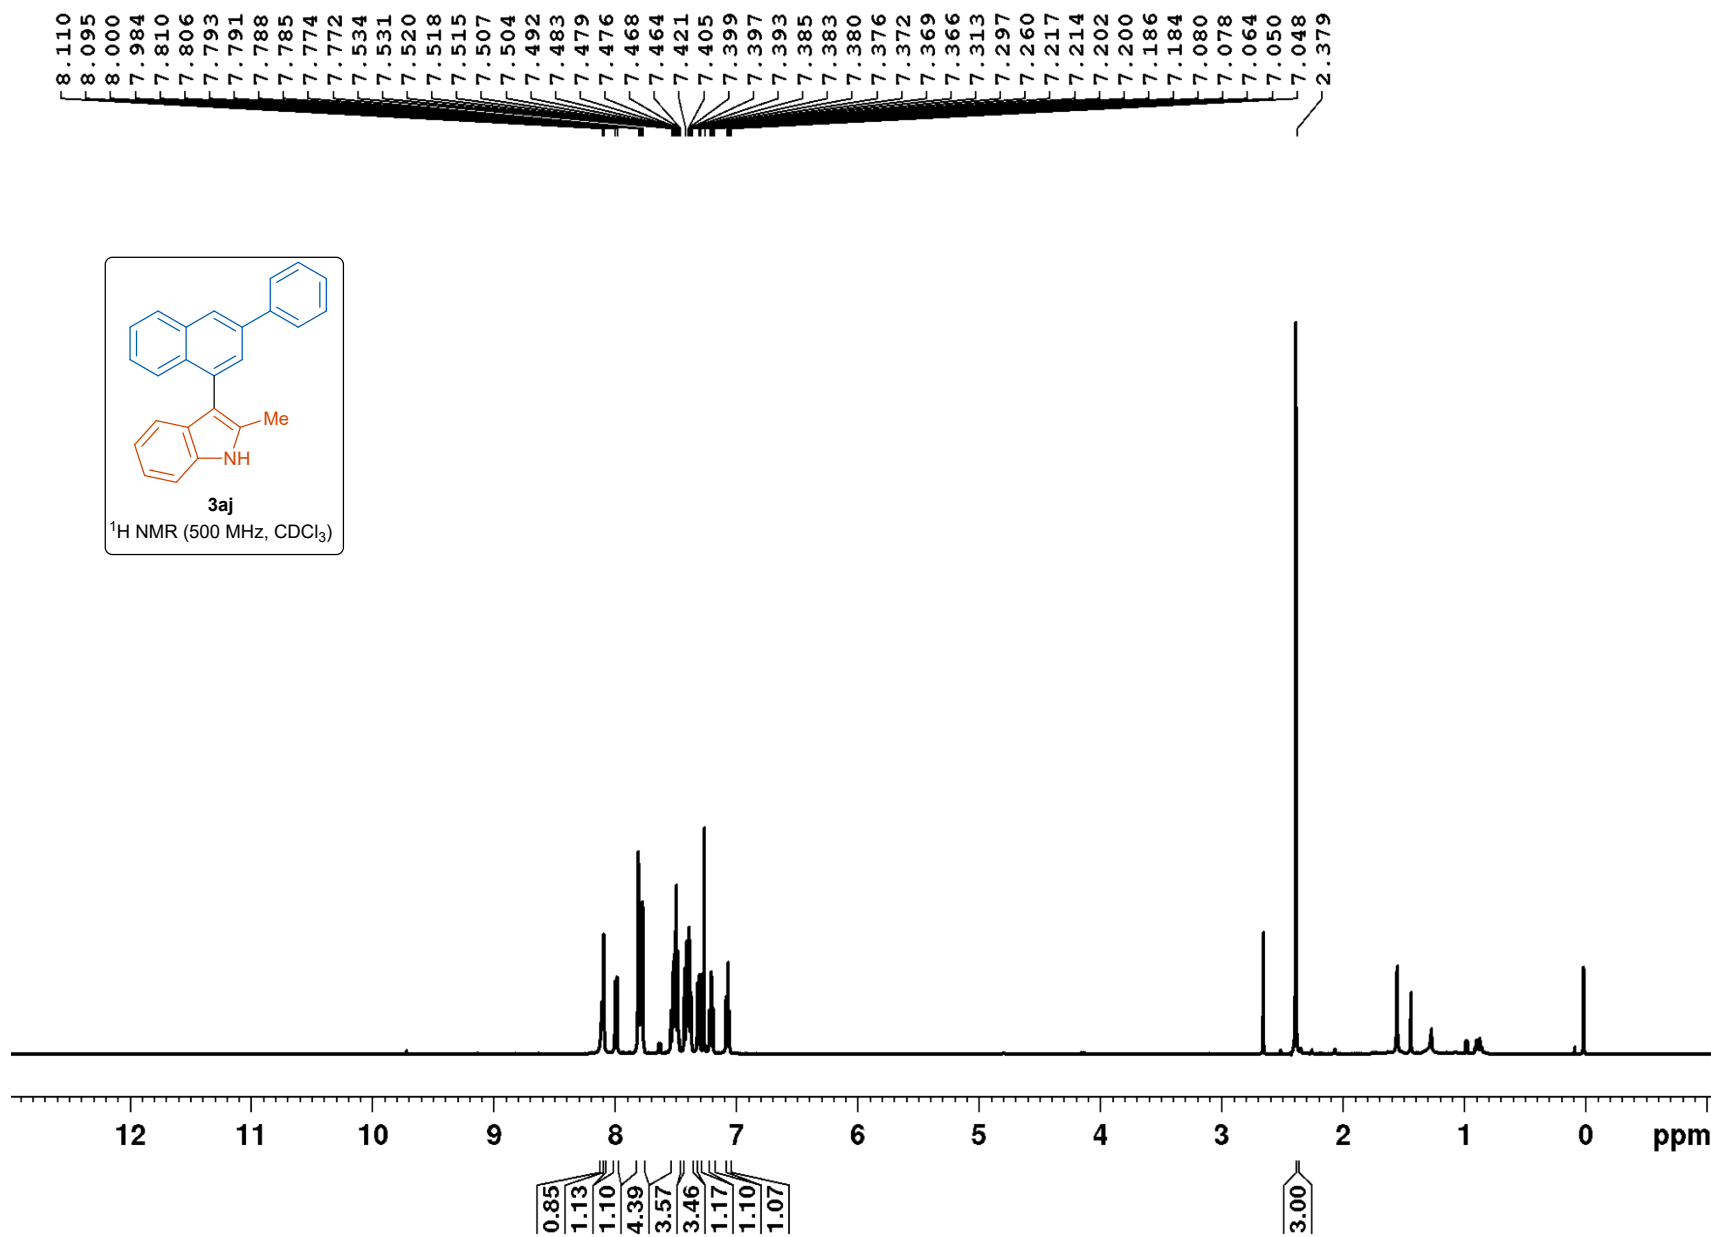

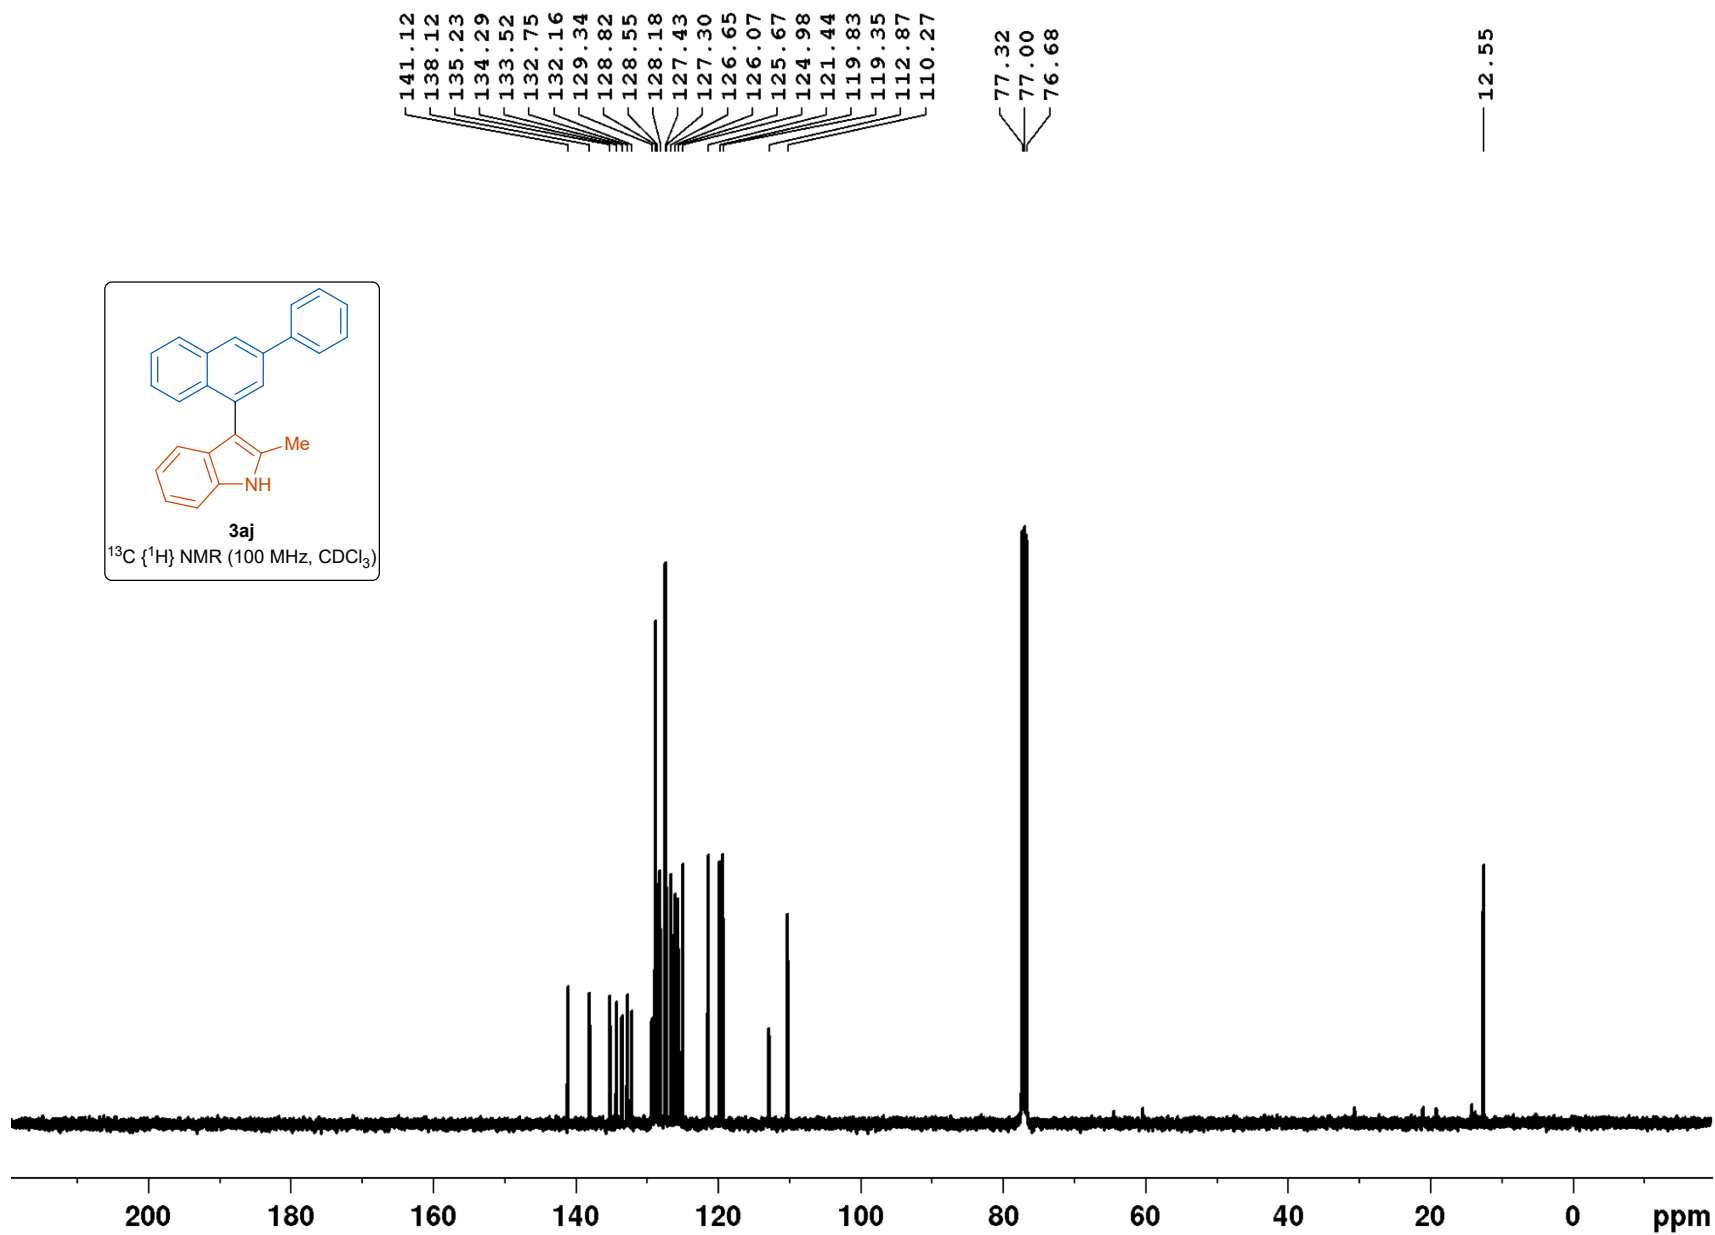

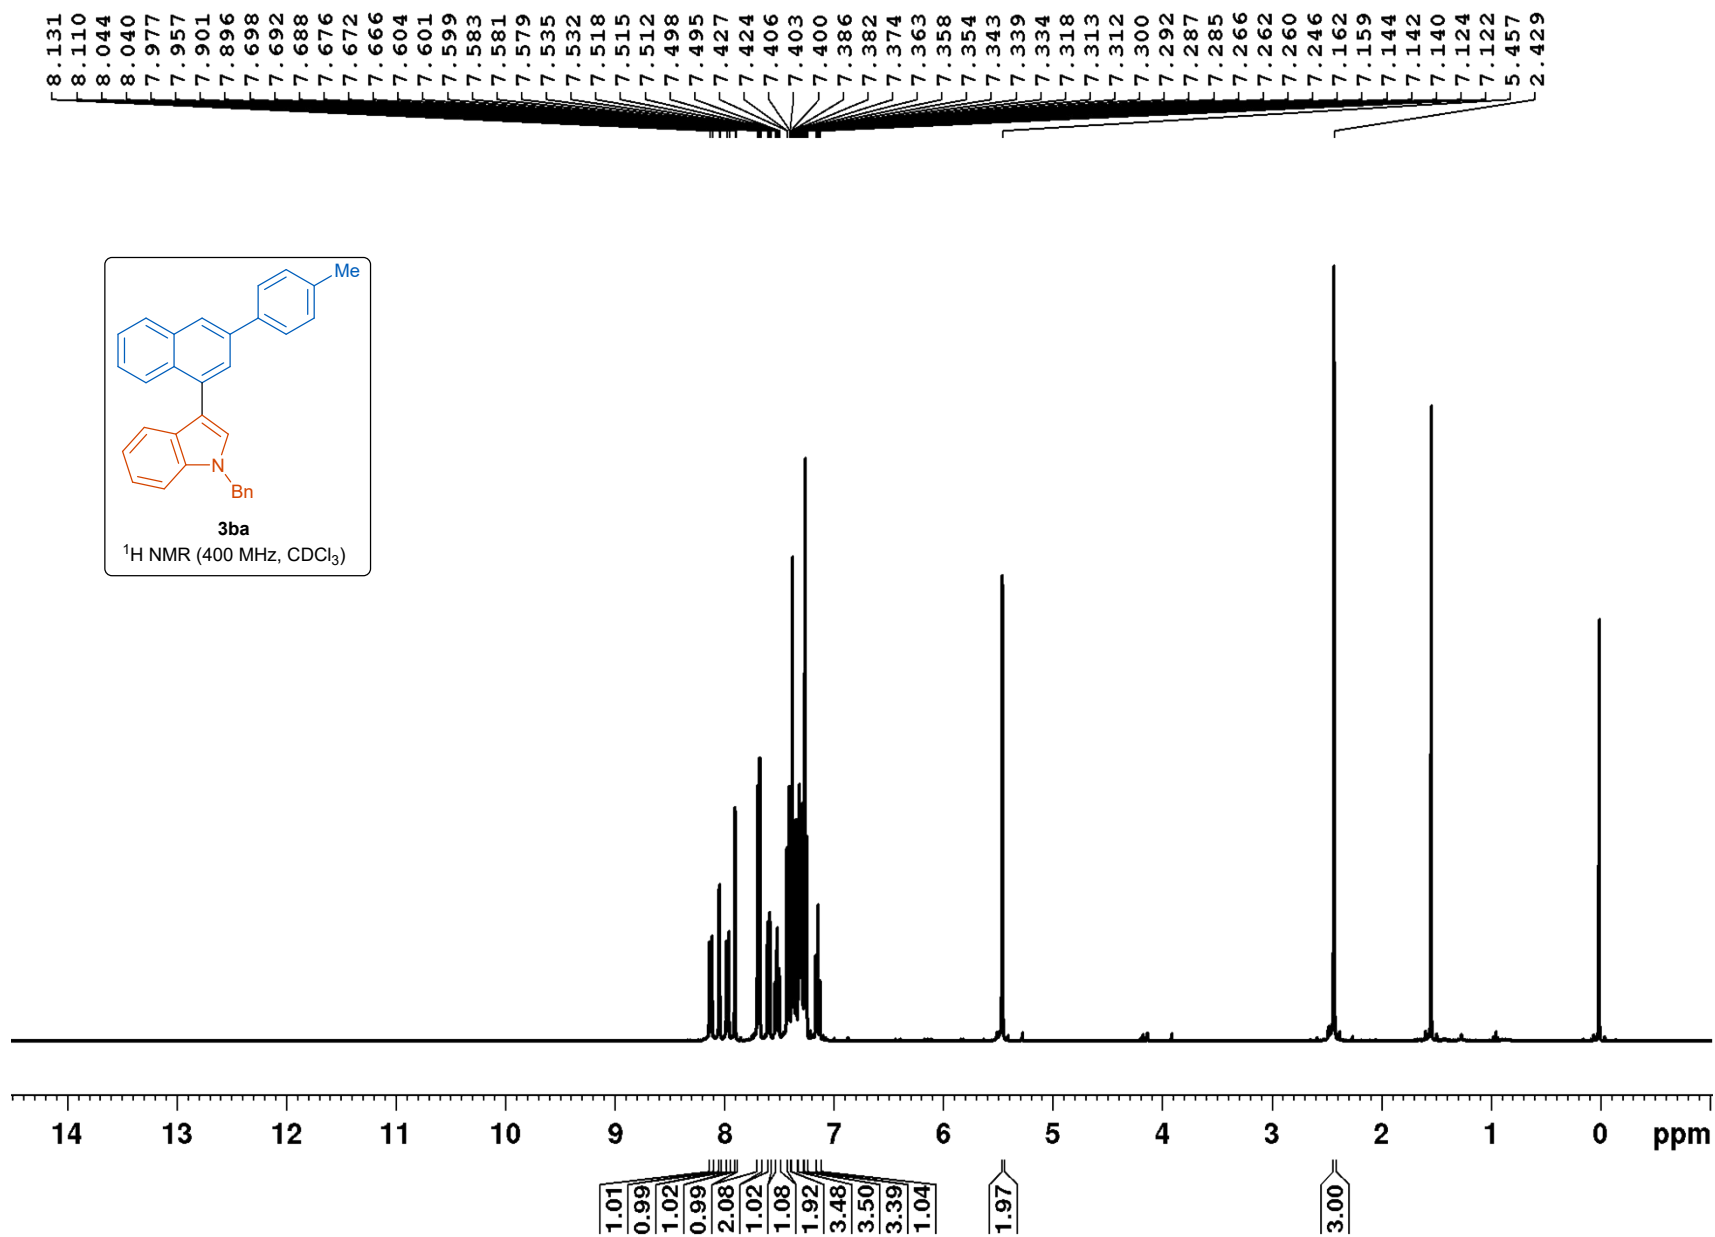



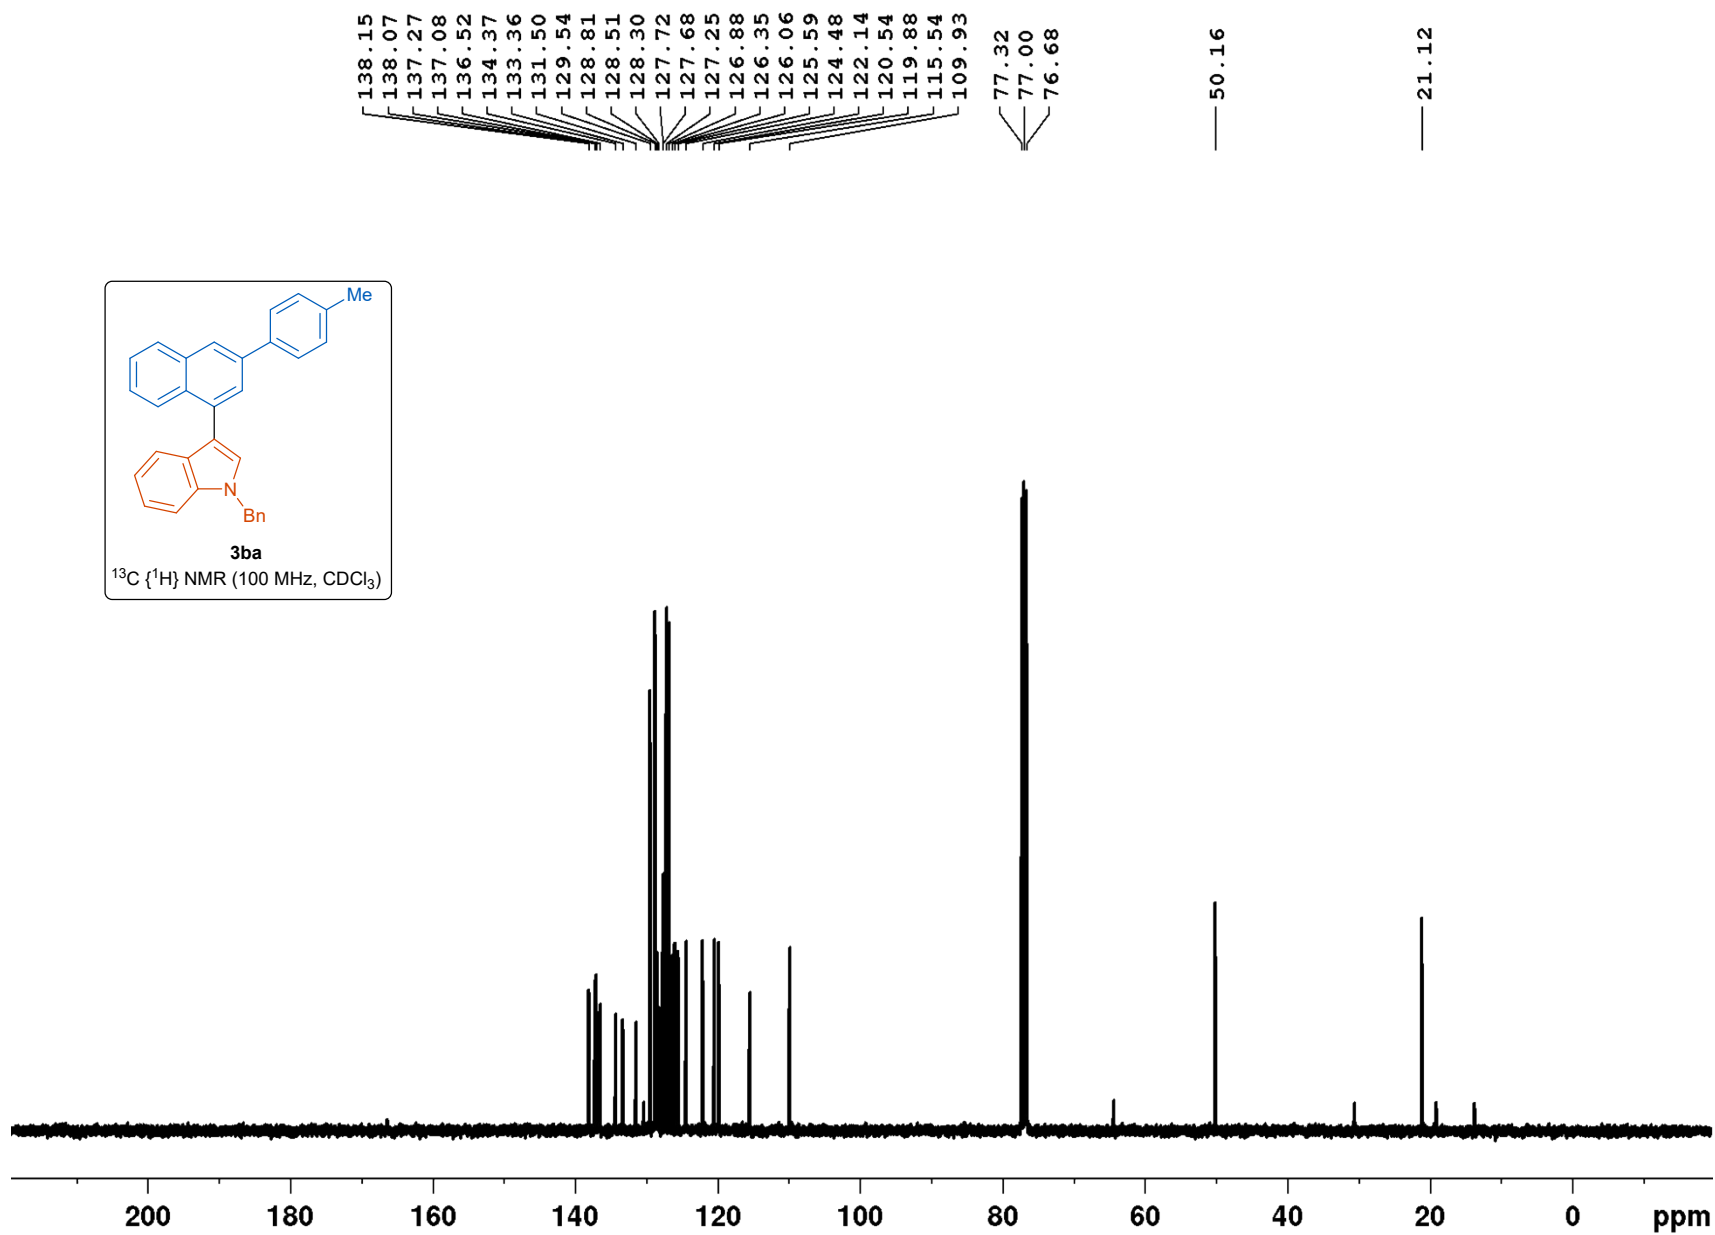

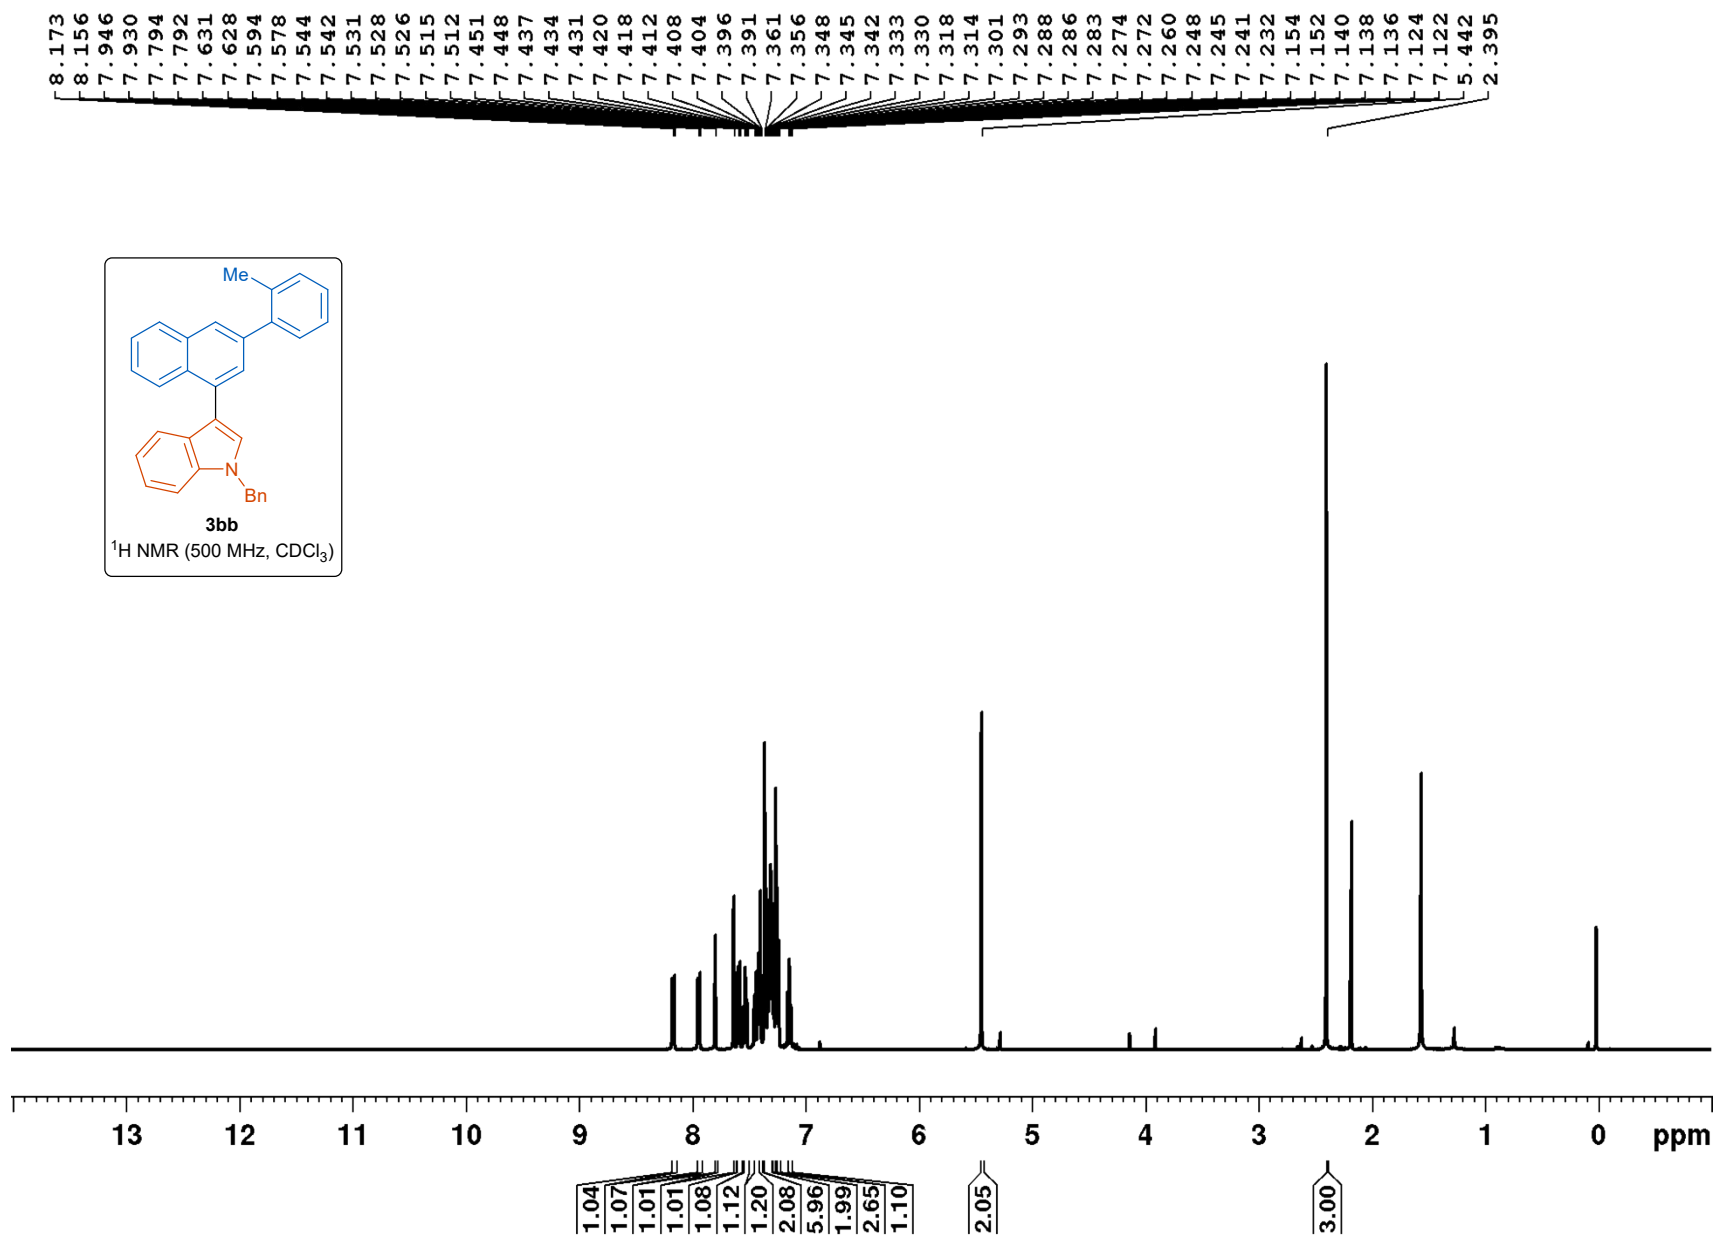

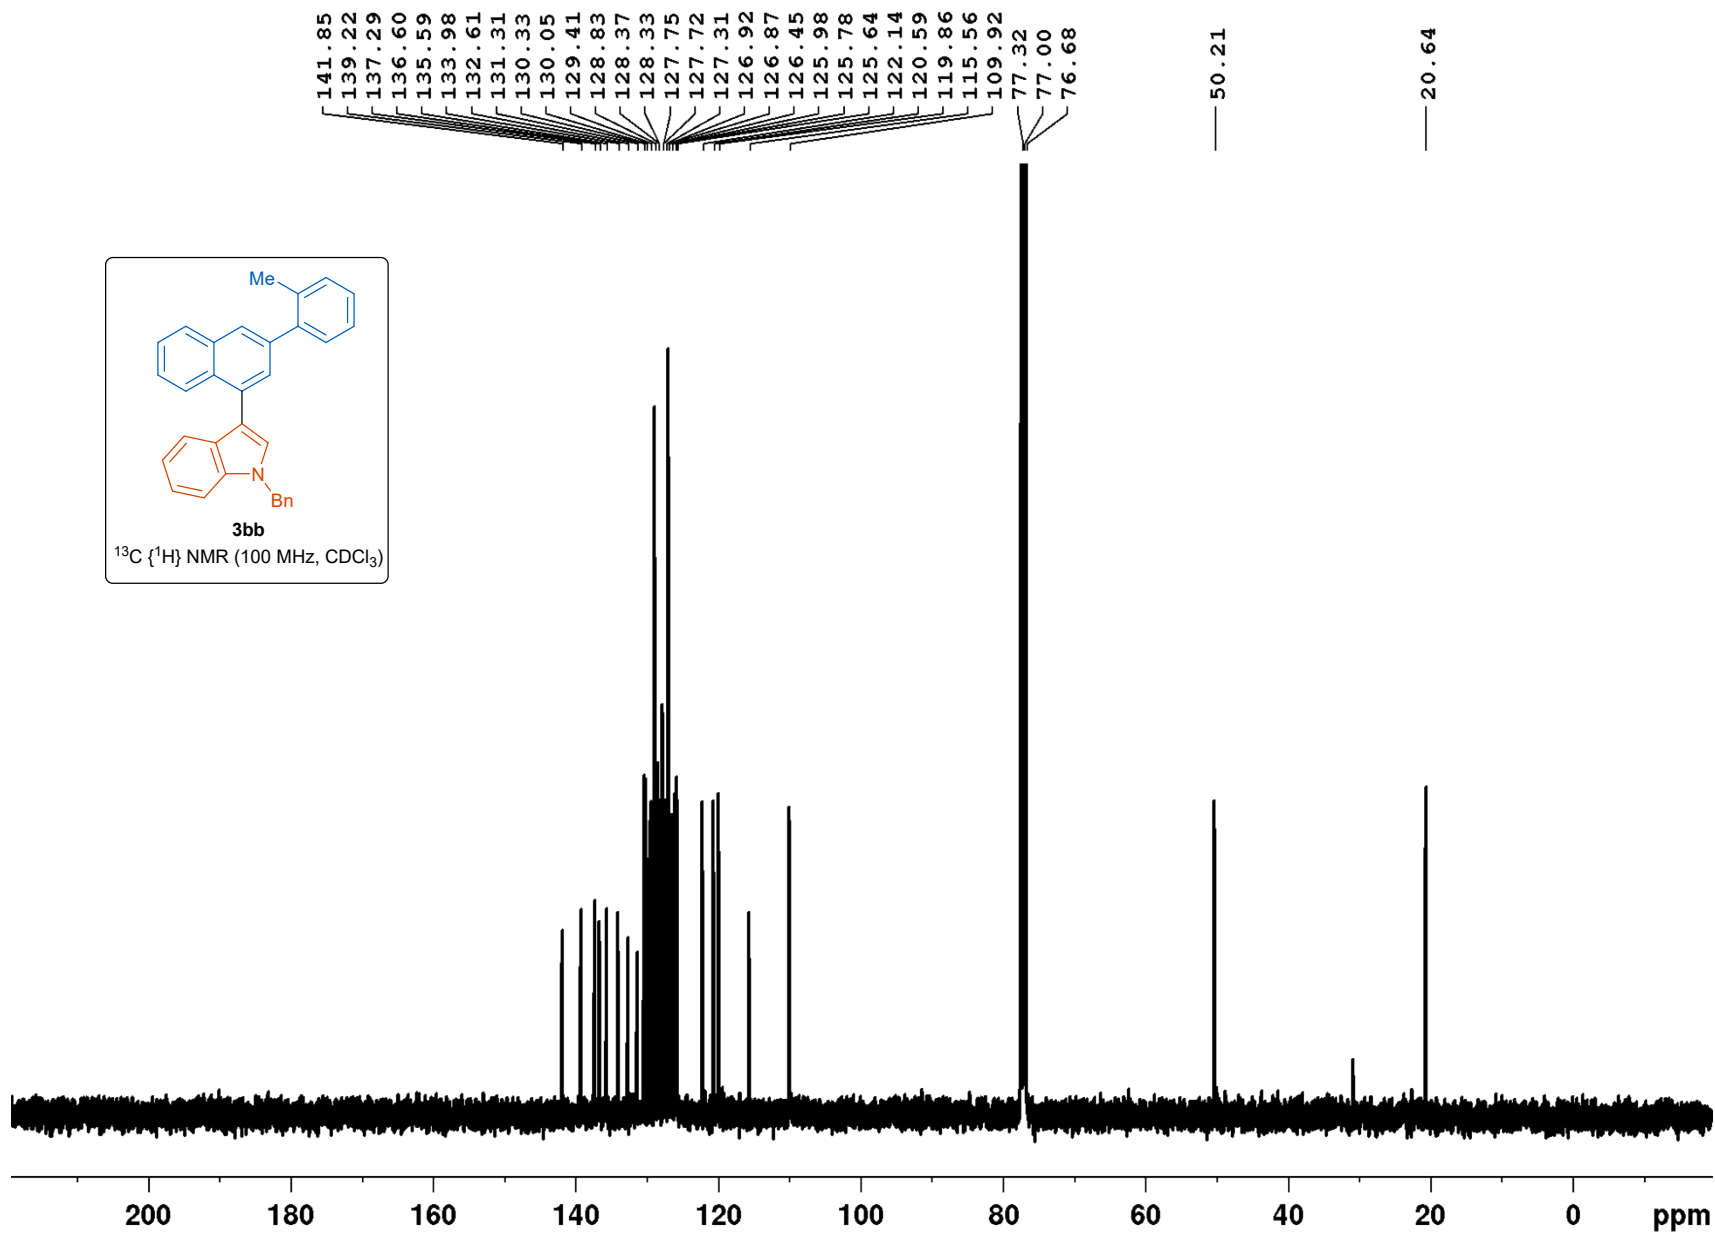

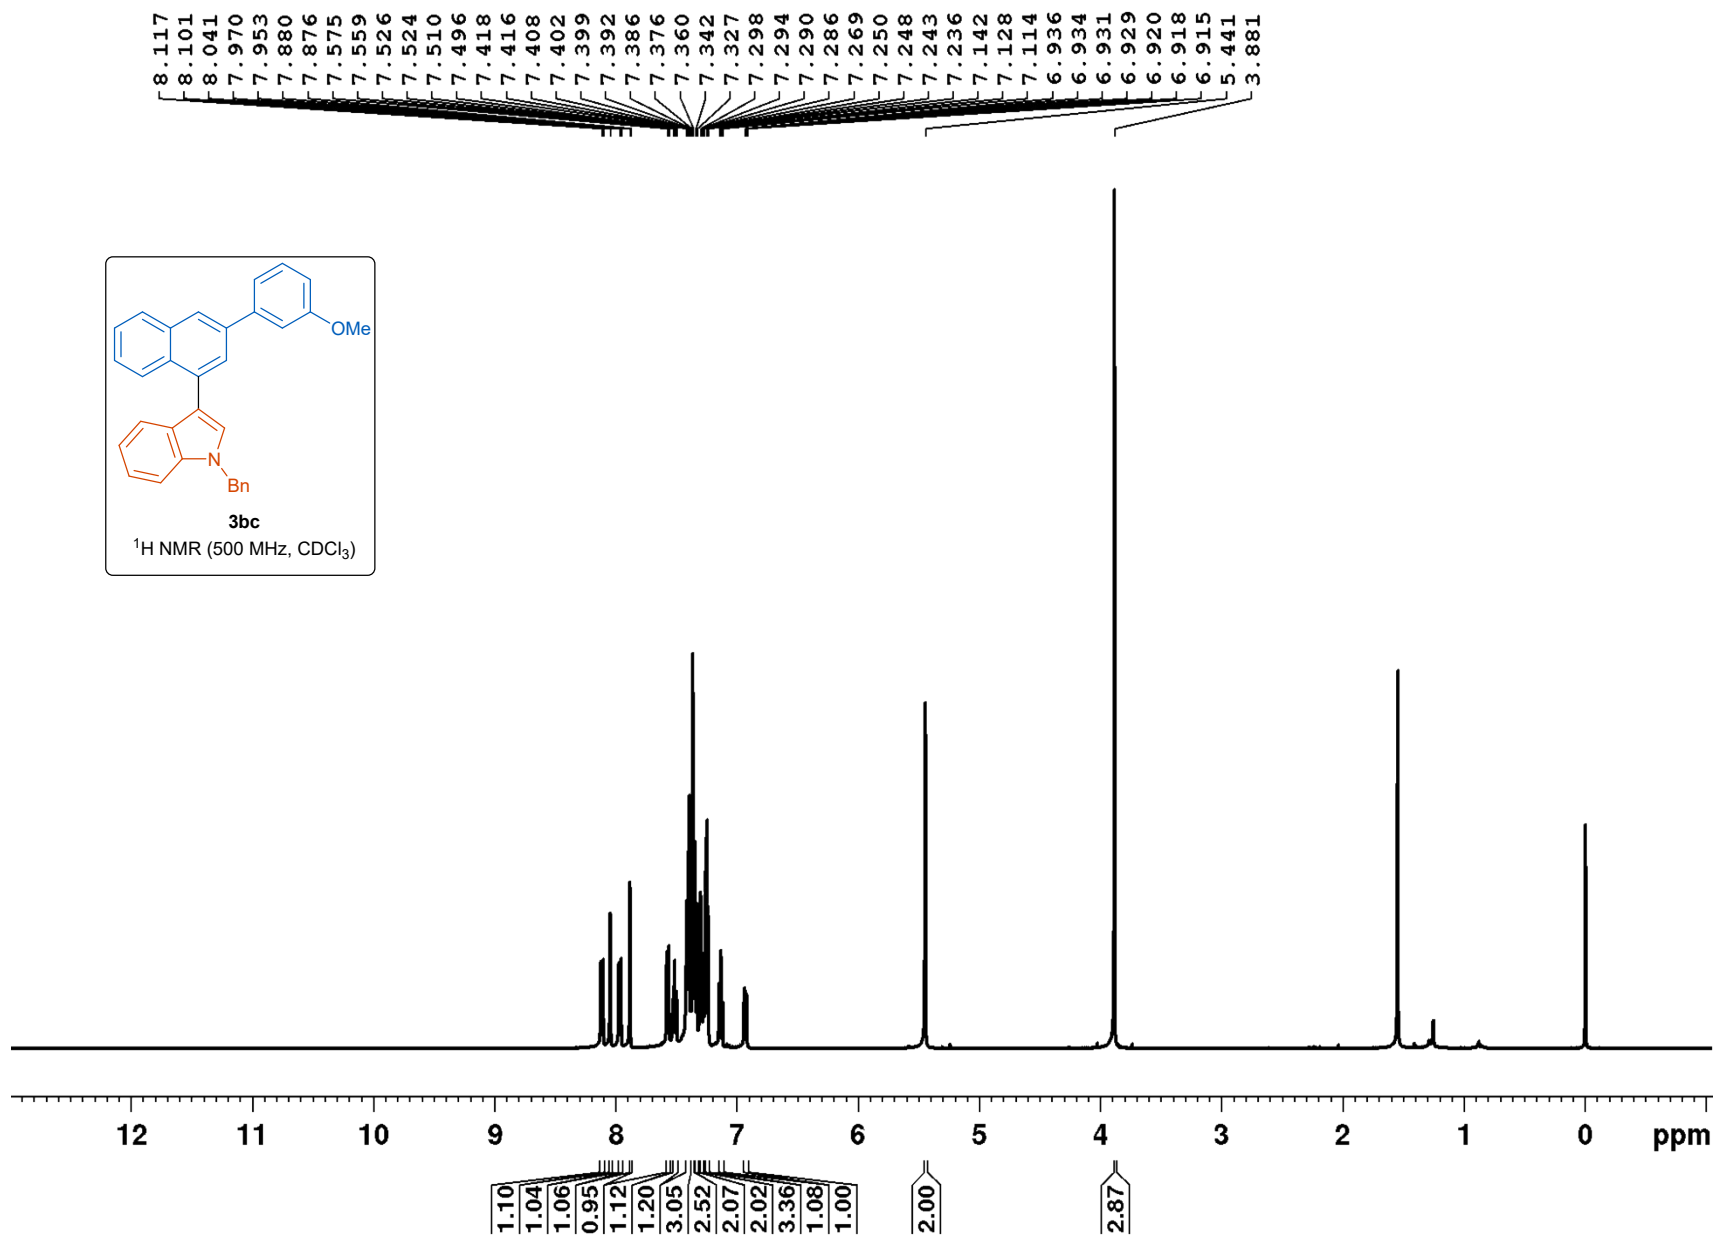

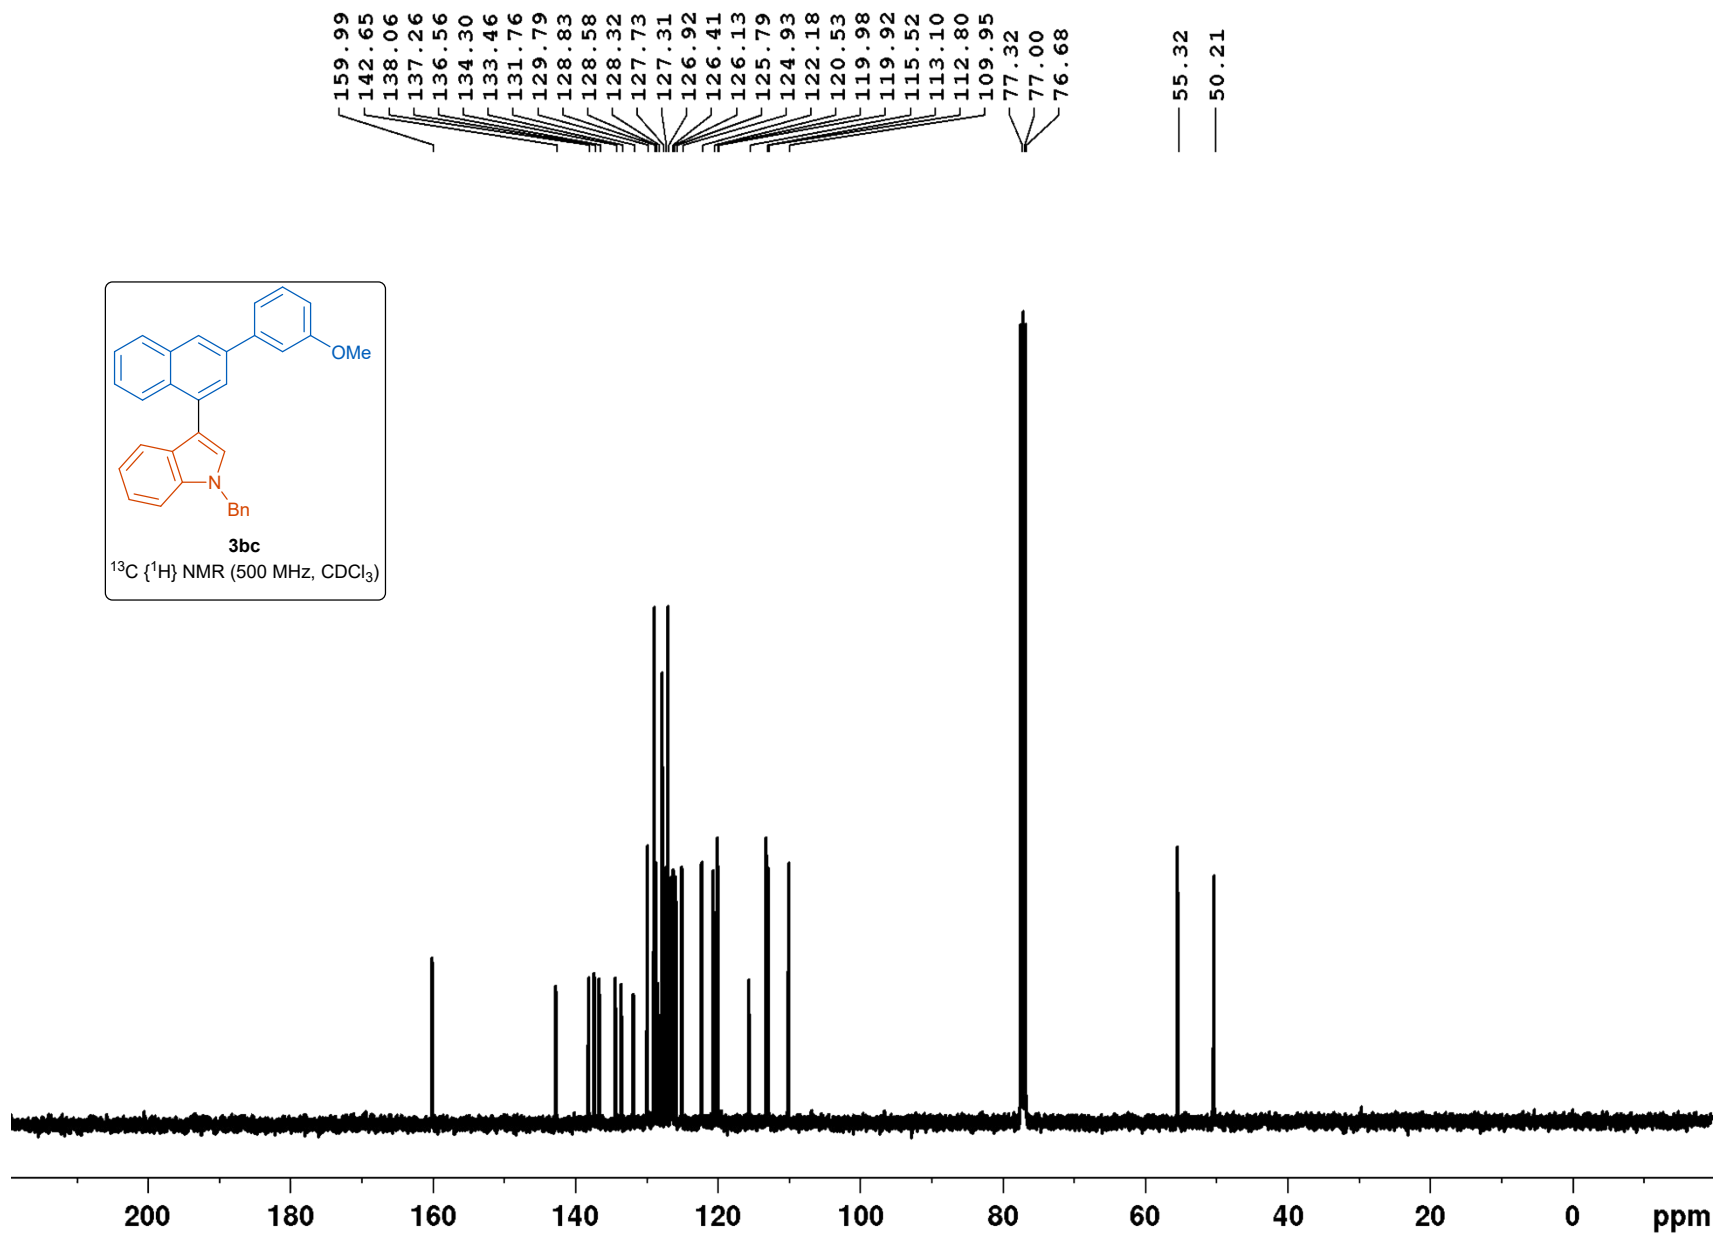

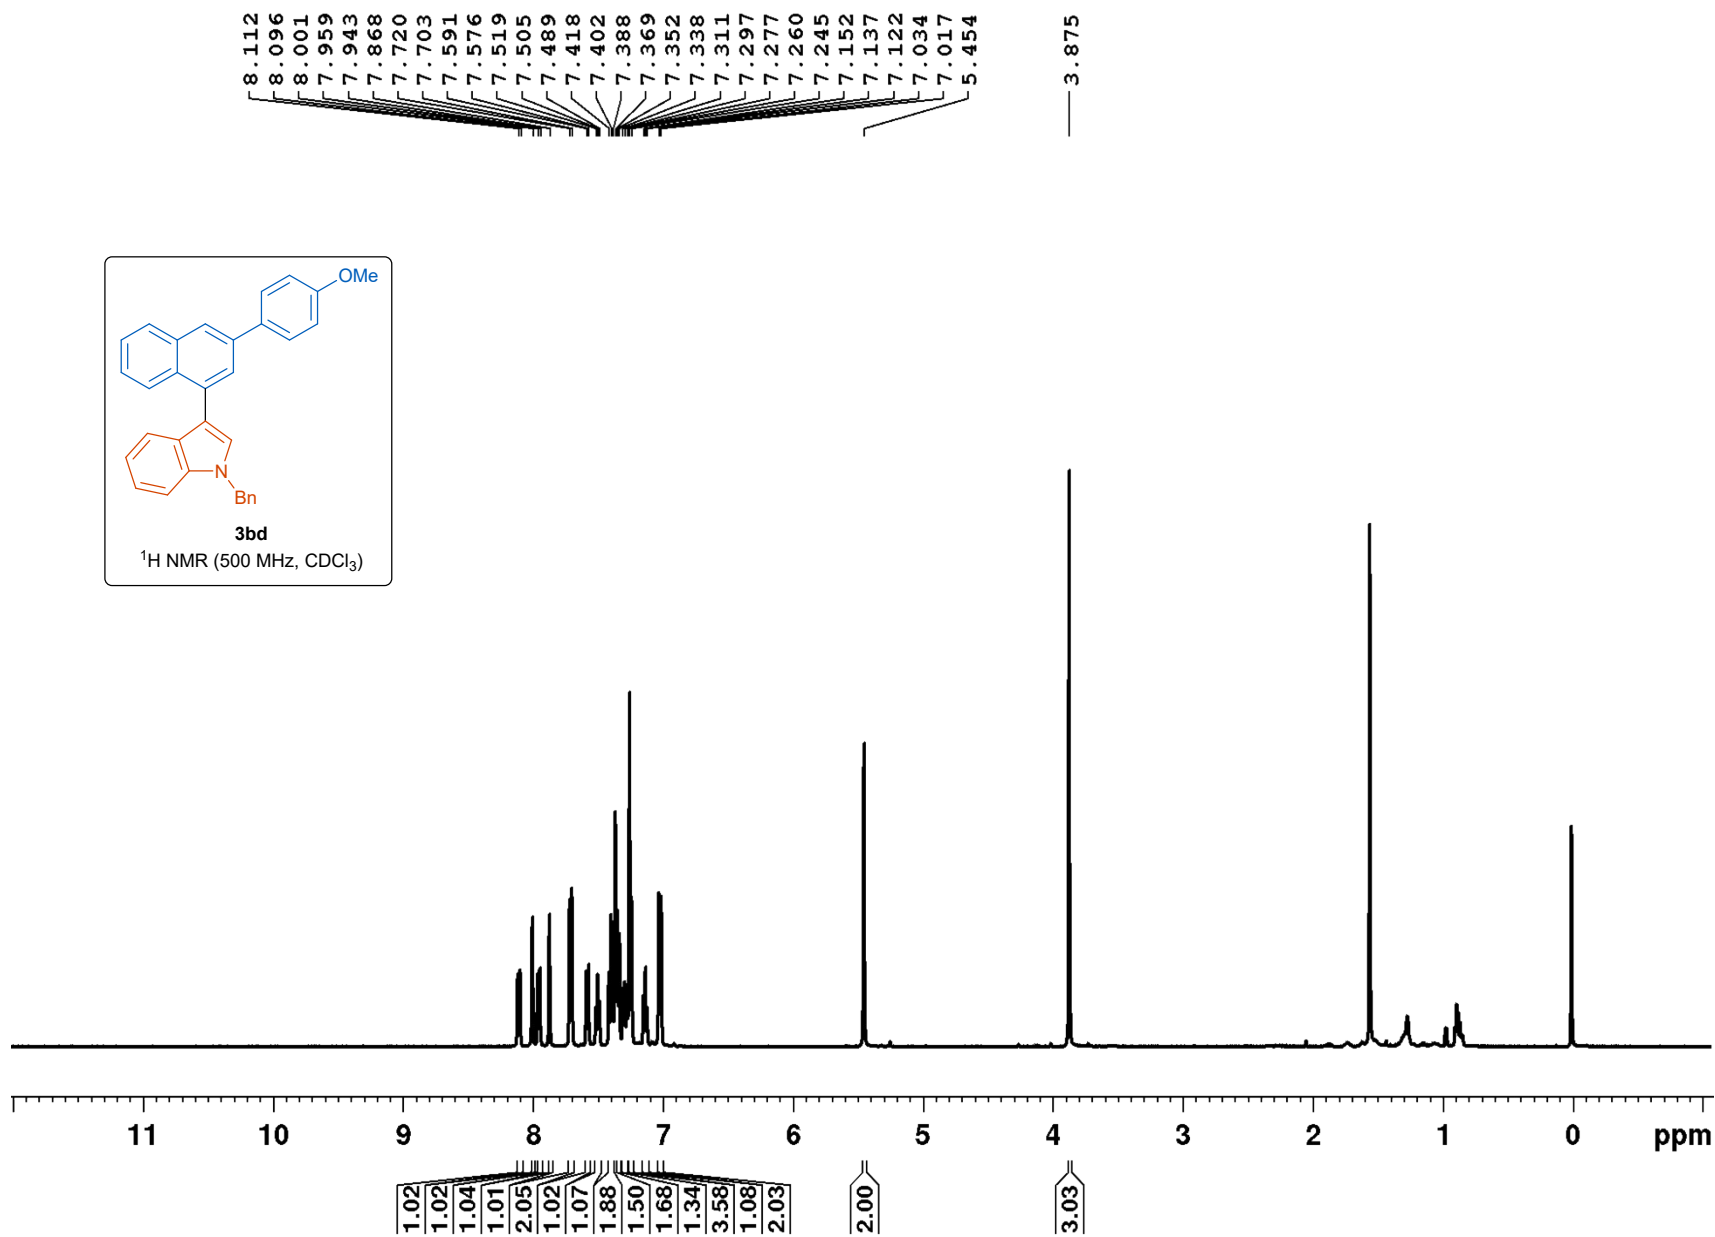

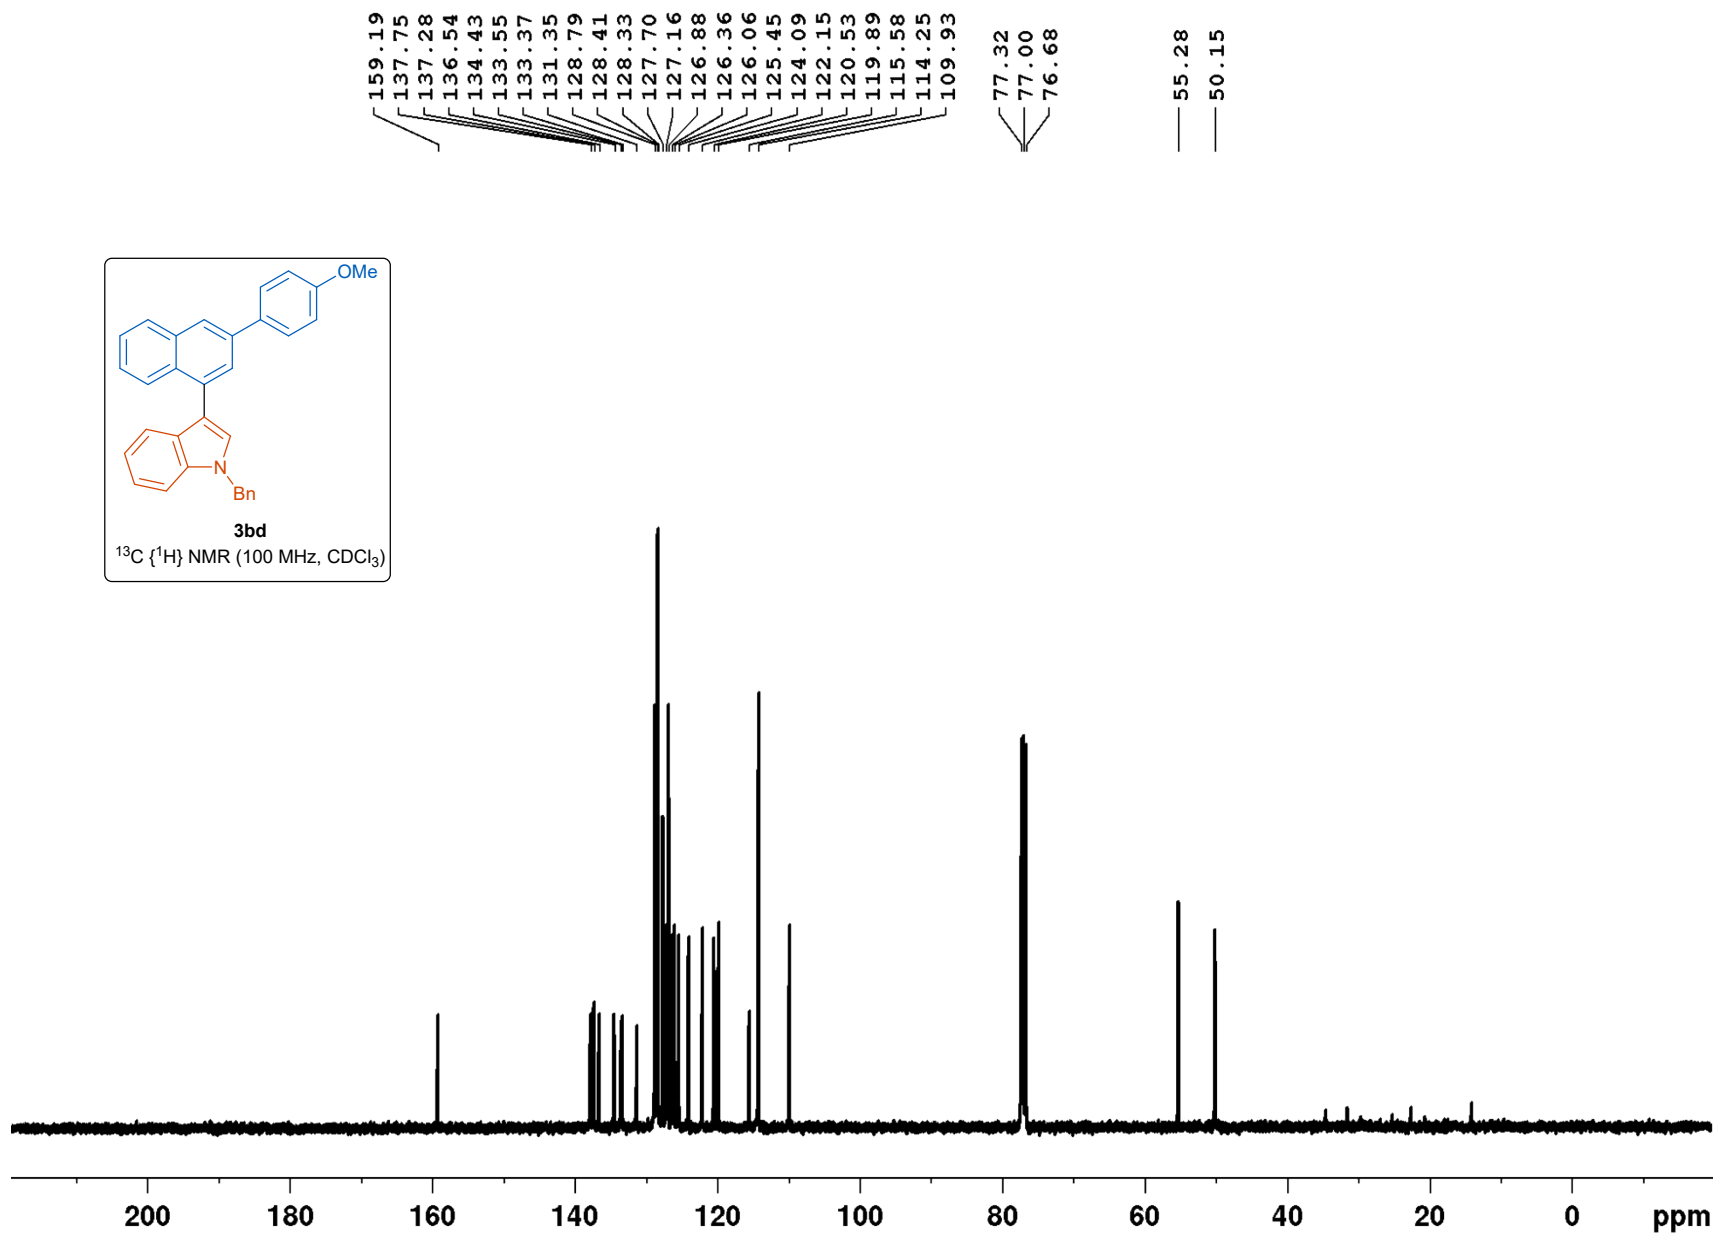

8.074  
8.057  
7.860  
7.844  
7.631  
7.553  
7.537  
7.487  
7.484  
7.477  
7.475  
7.463  
7.461  
7.458  
7.447  
7.445  
7.405  
7.389  
7.372  
7.369  
7.366  
7.359  
7.355  
7.352  
7.346  
7.343  
7.340  
7.332  
7.327  
7.314  
7.312  
7.304  
7.300  
7.295  
7.285  
7.270  
7.268  
7.260  
7.256  
7.254  
7.239  
7.147  
7.145  
7.131  
7.117  
7.115  
5.446  
2.828  
2.813  
2.797  
1.786  
1.771  
1.756  
1.741  
1.725  
1.437  
1.423  
1.407  
1.361  
1.356  
1.349  
1.346  
1.341  
1.334  
1.327  
0.917  
0.903  
0.889

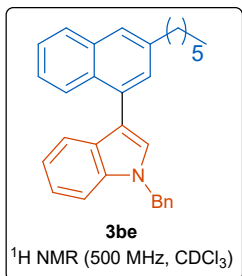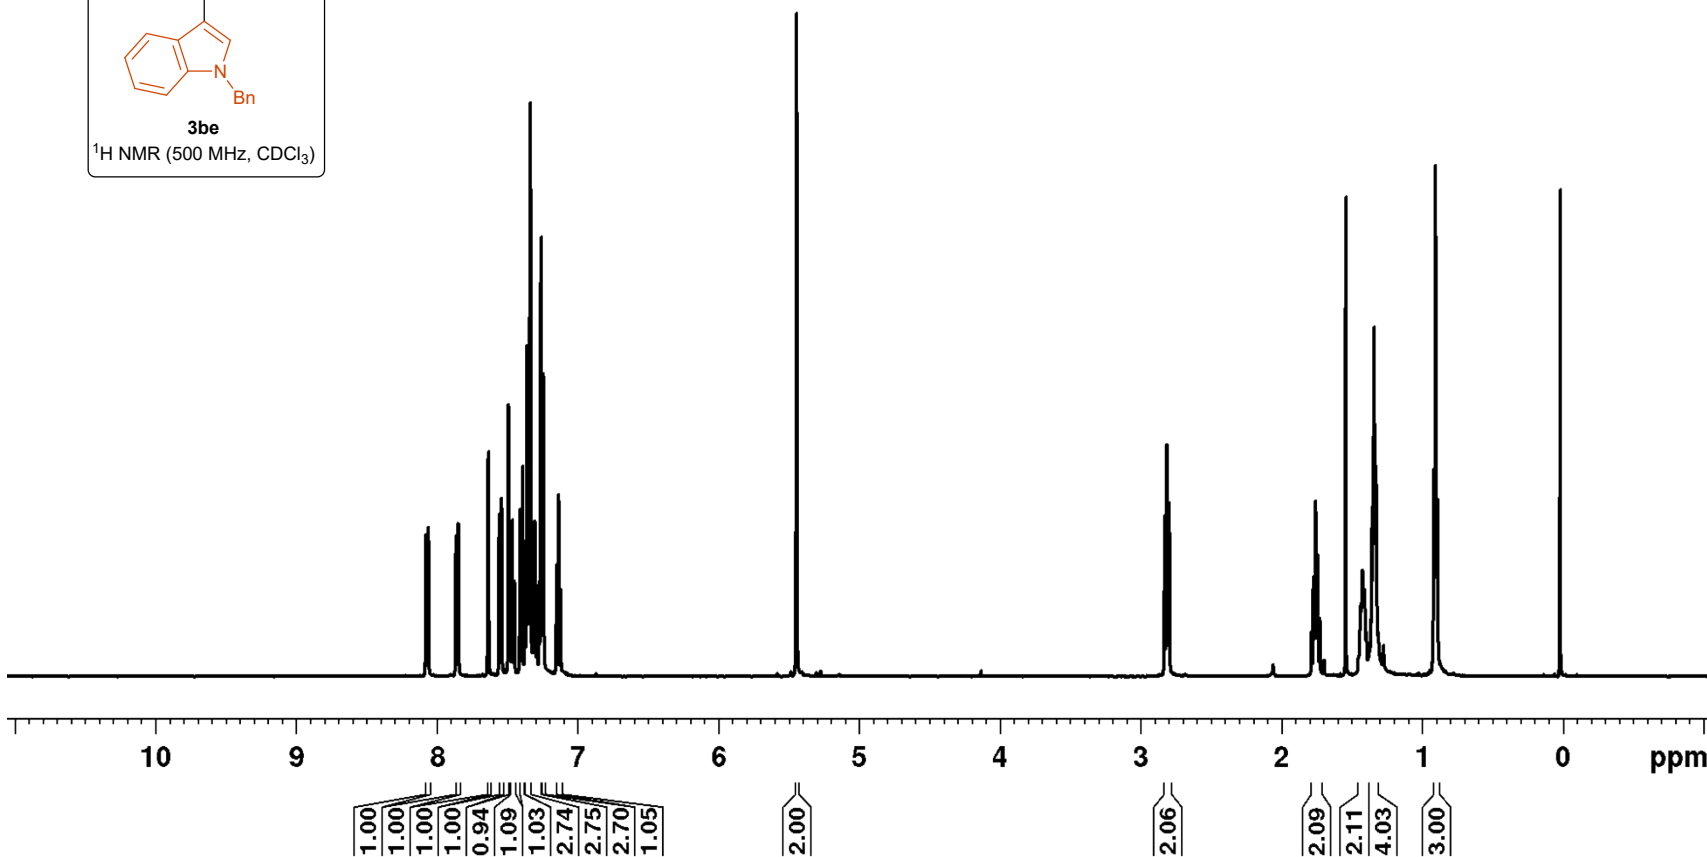



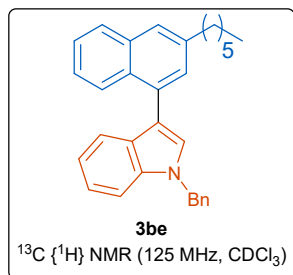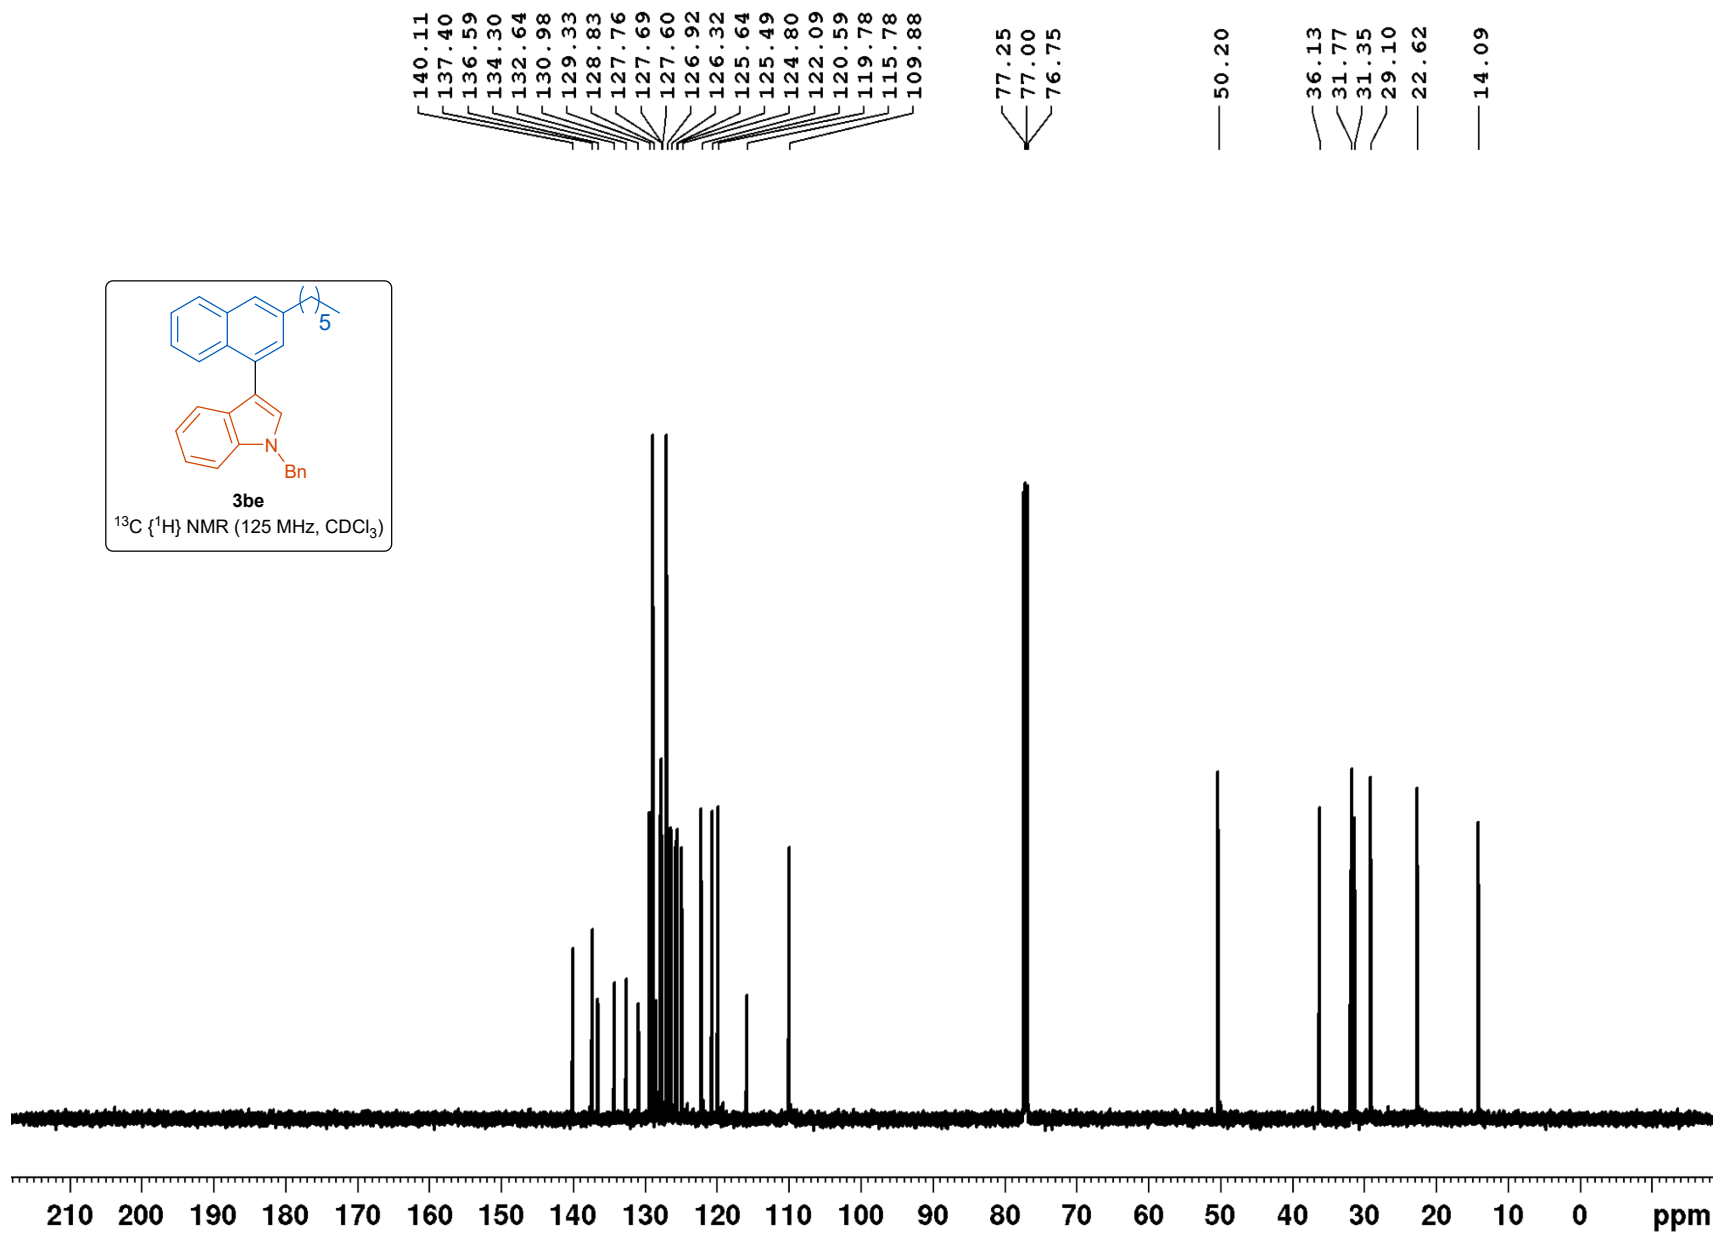

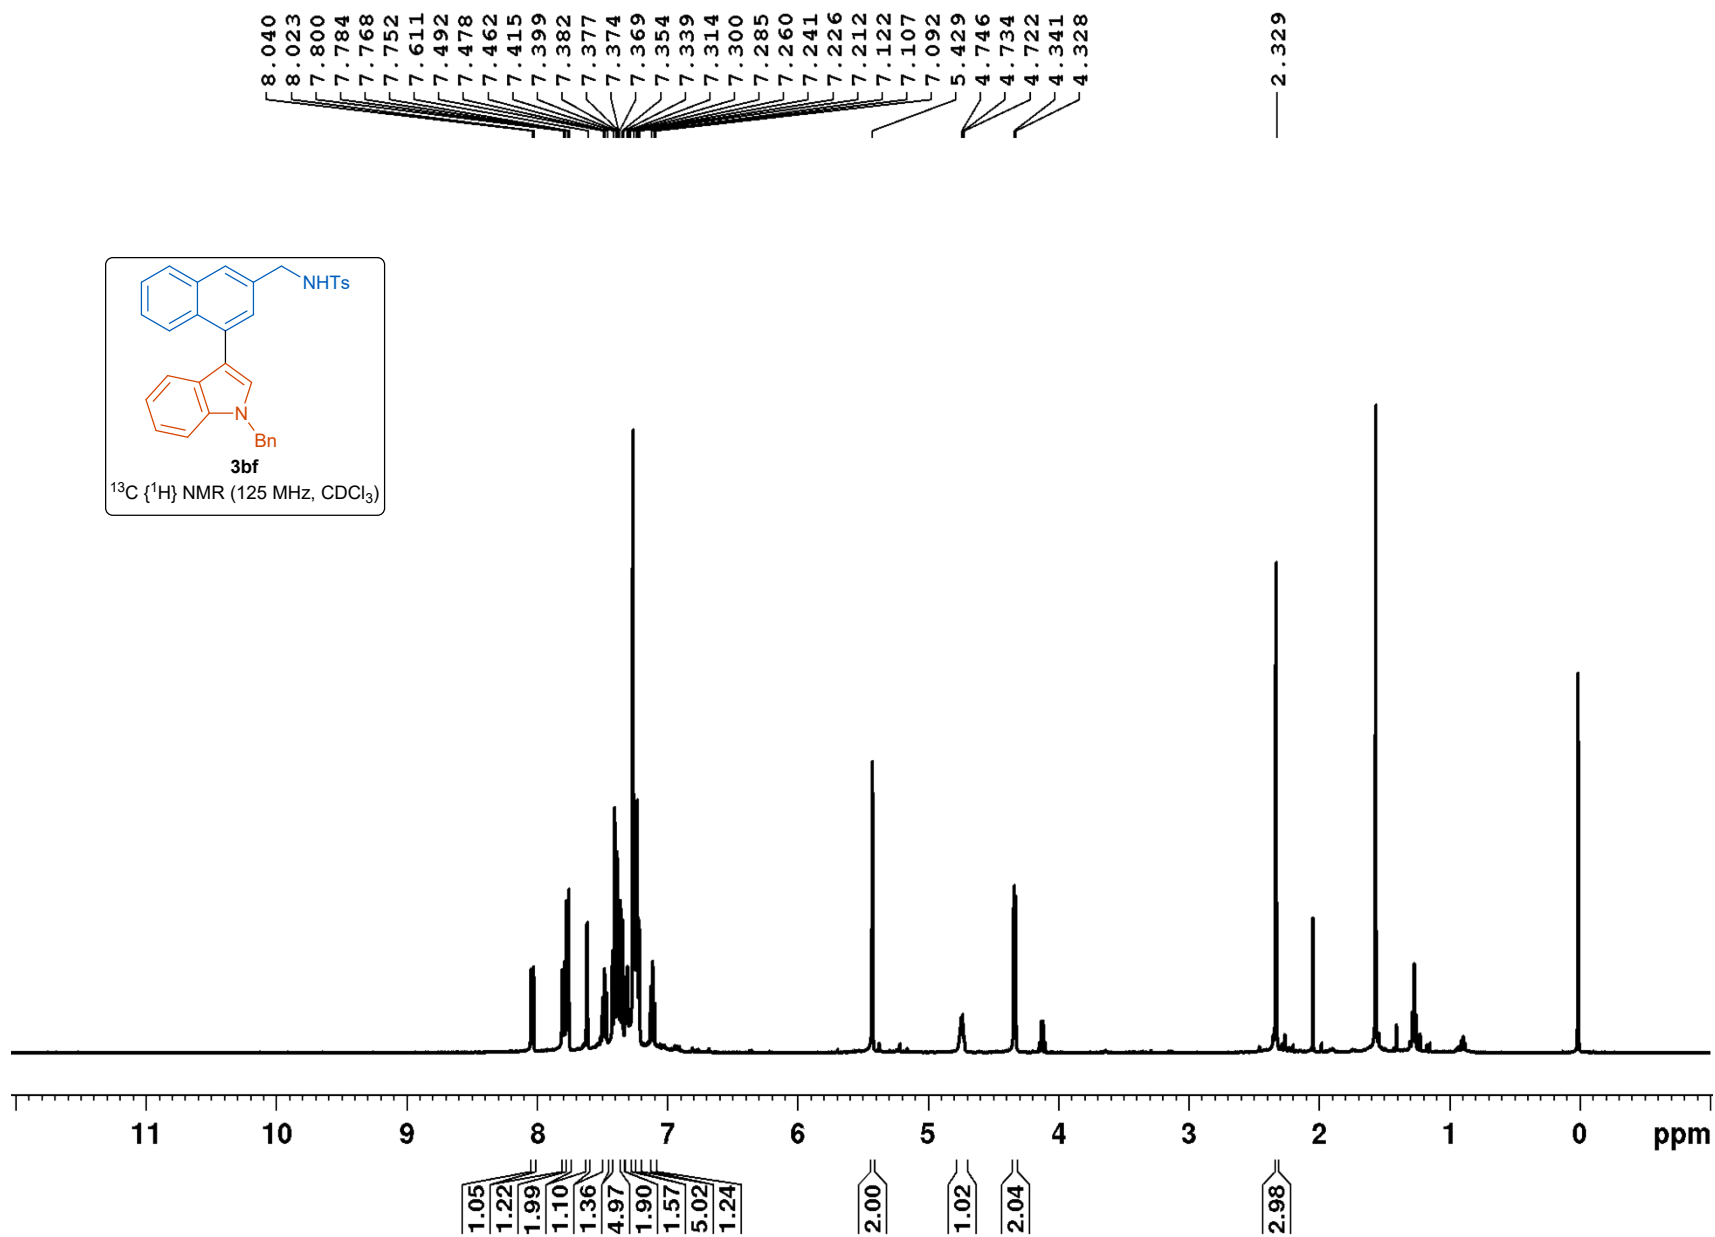

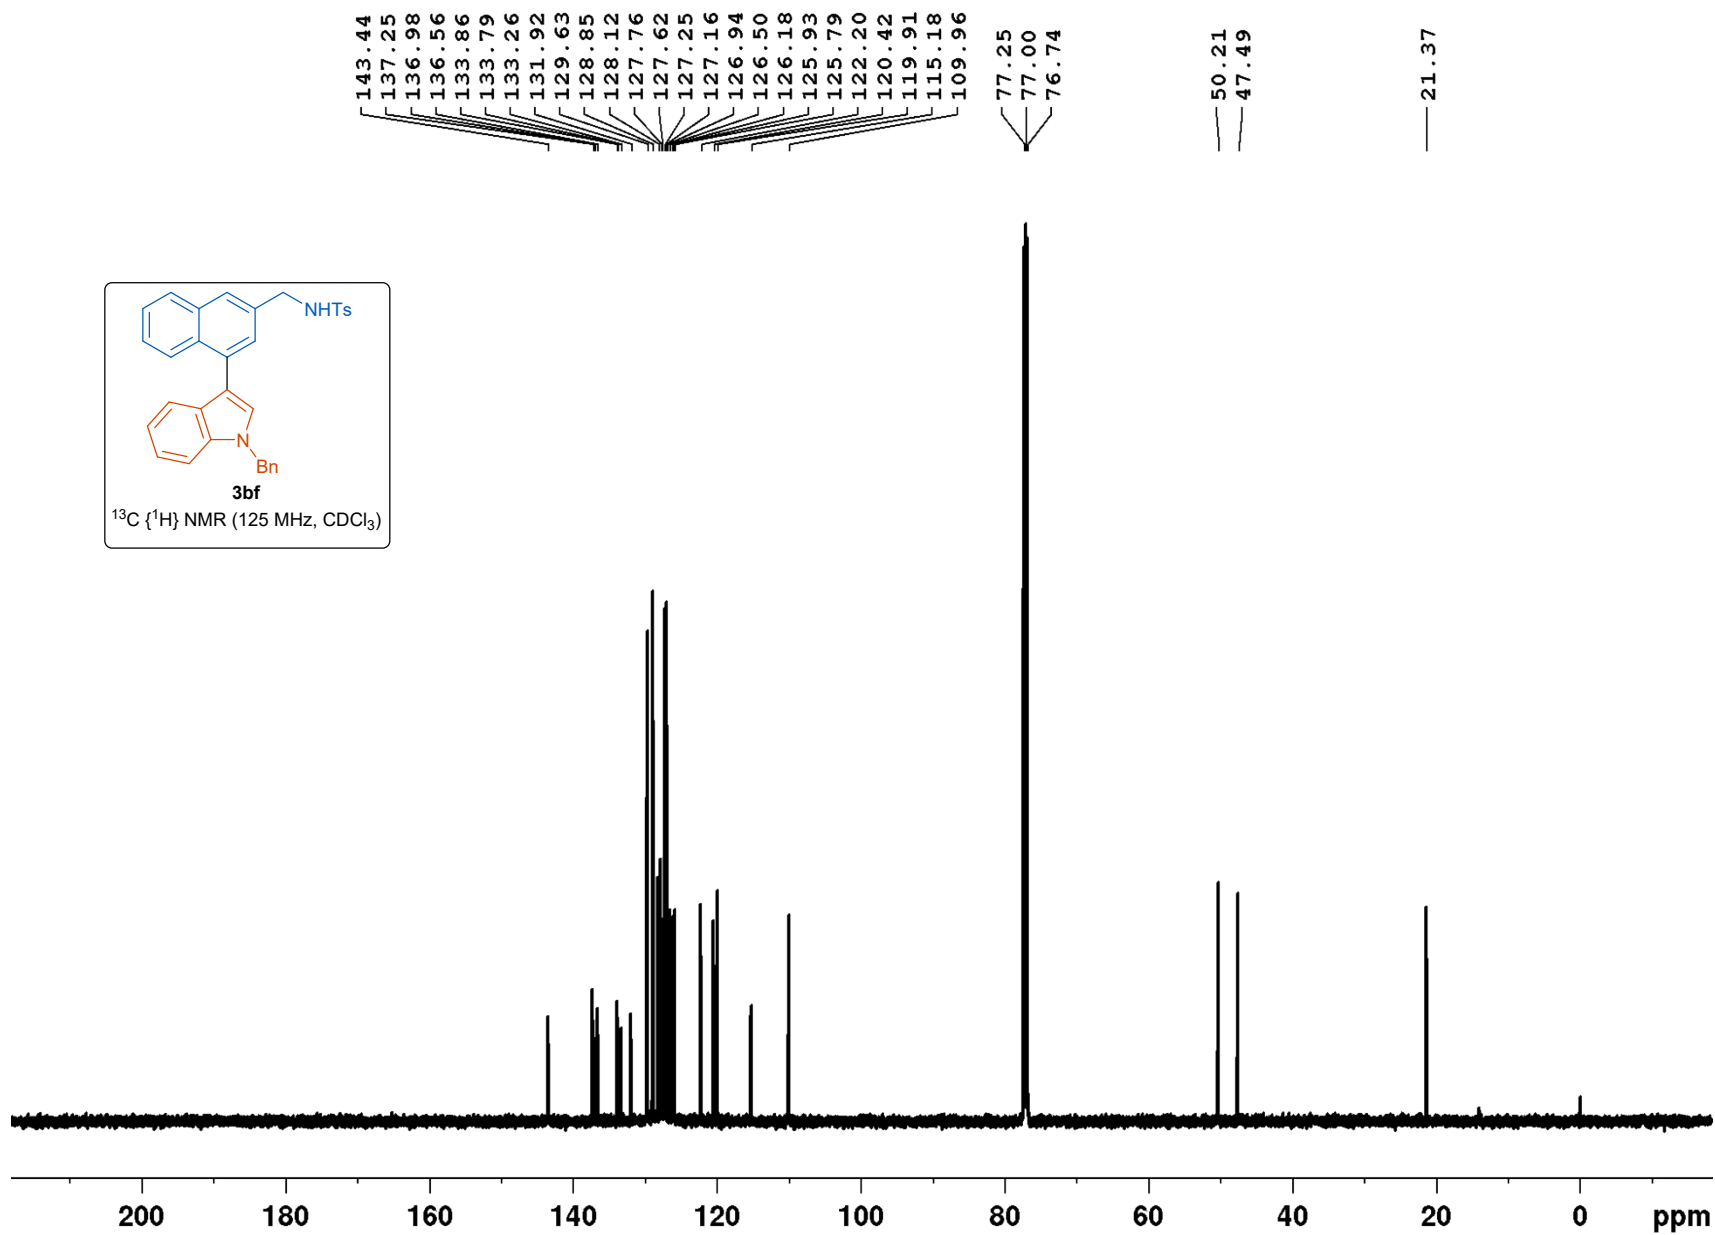

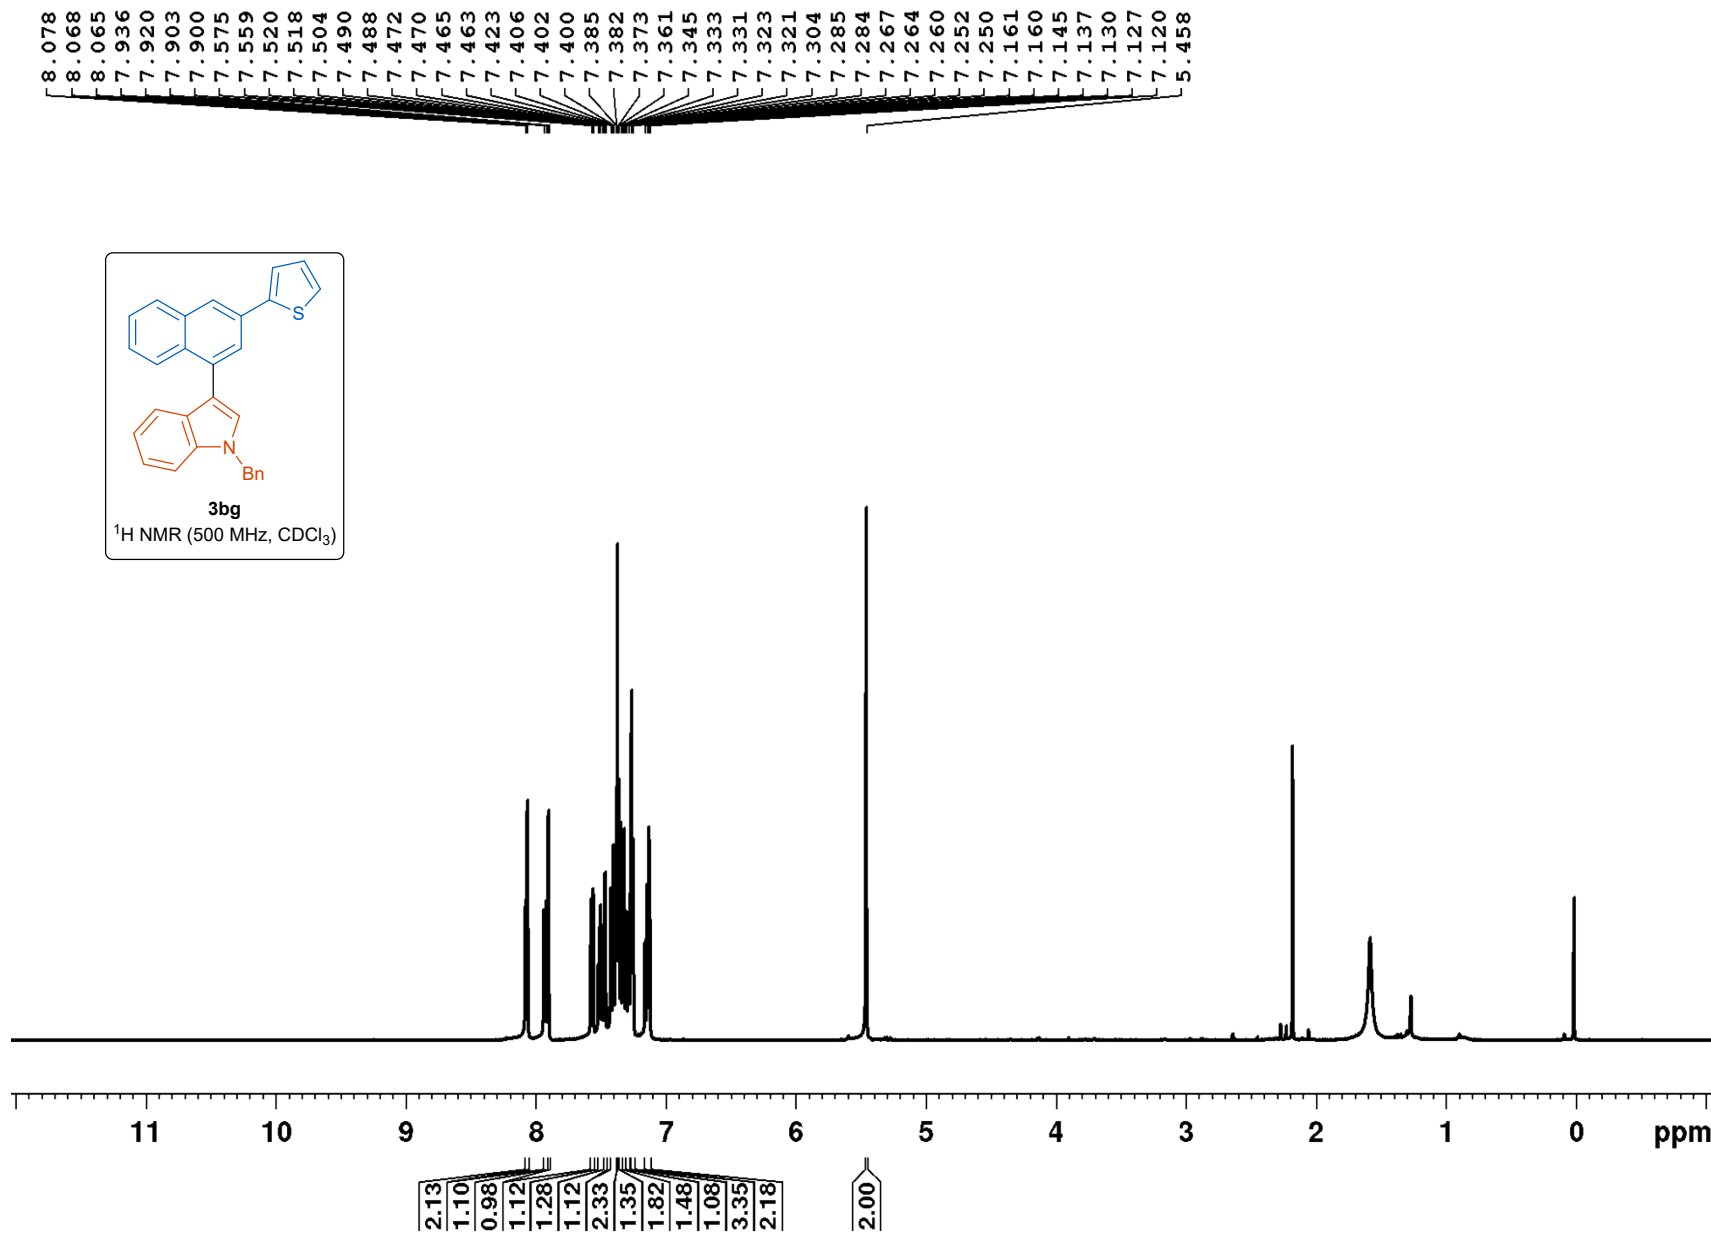

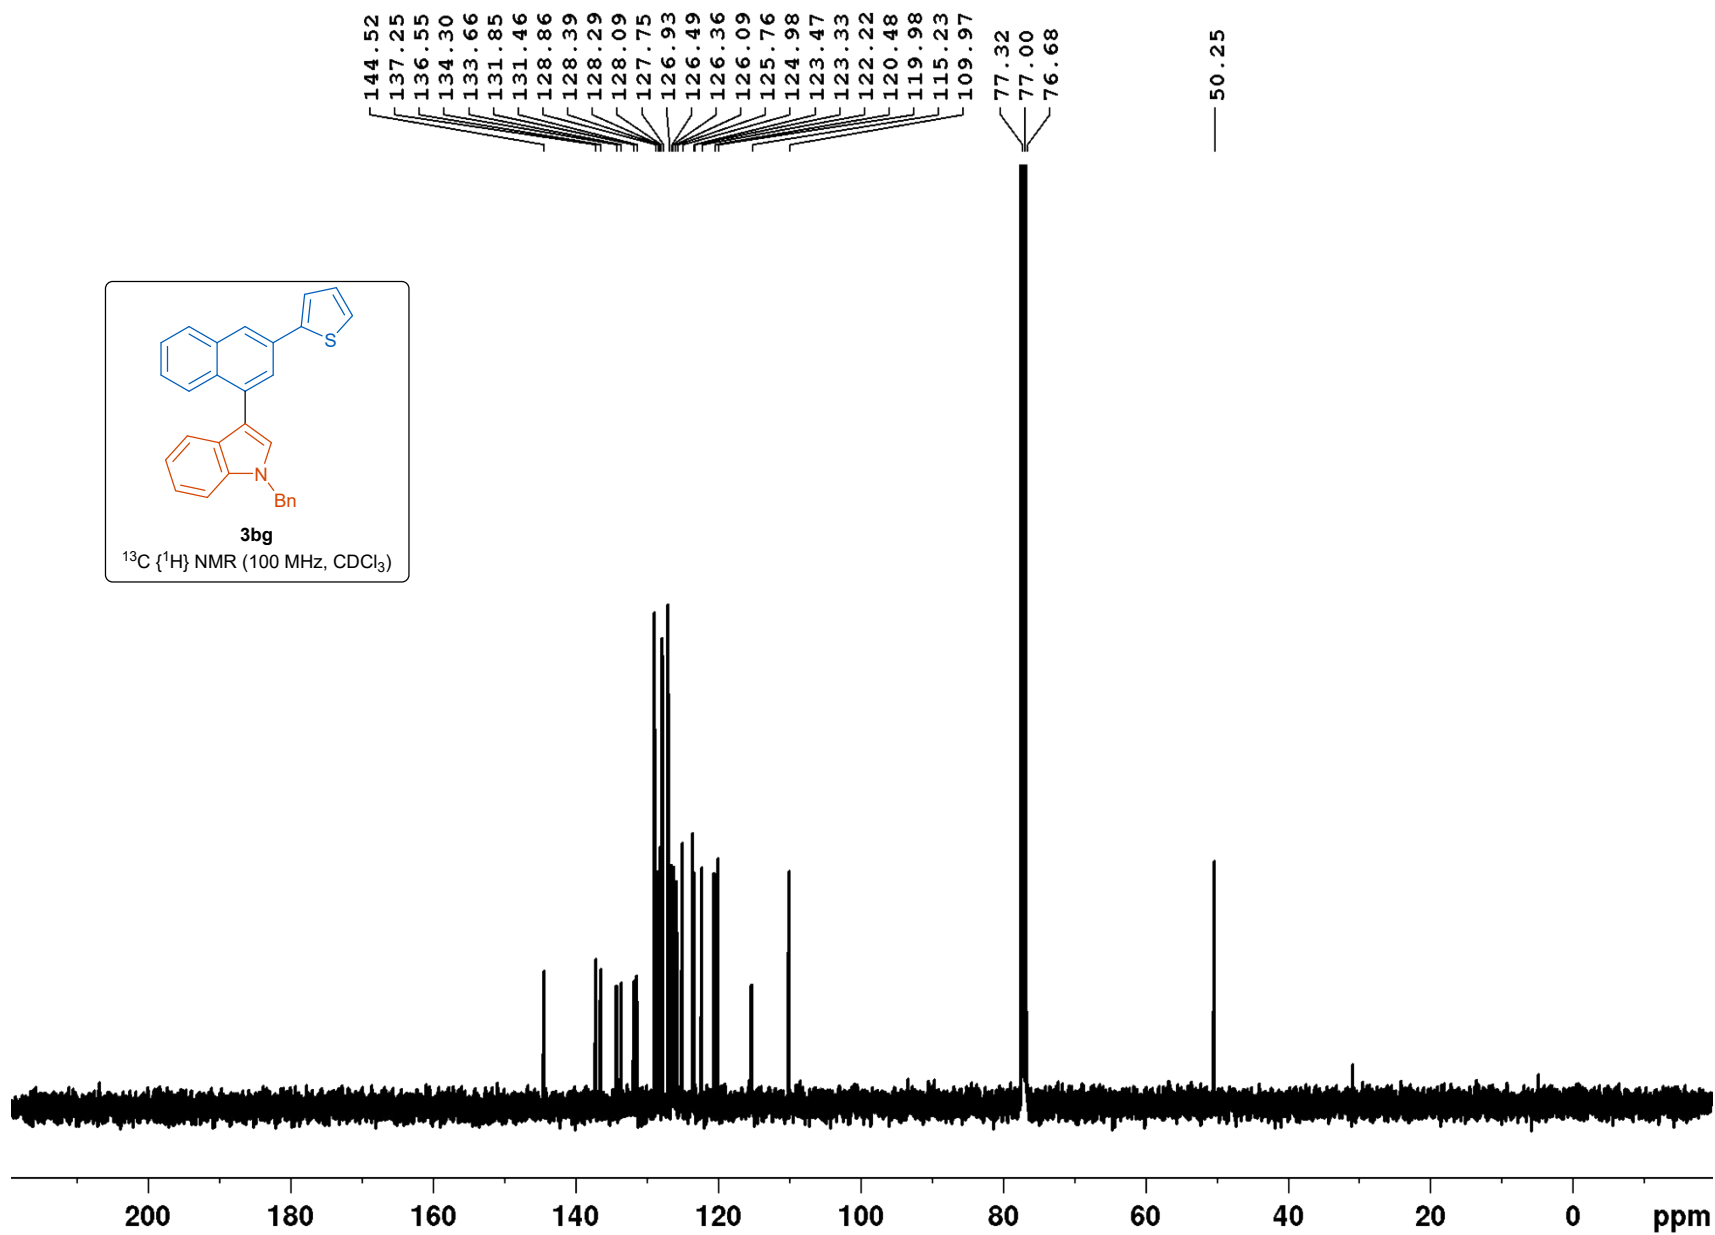

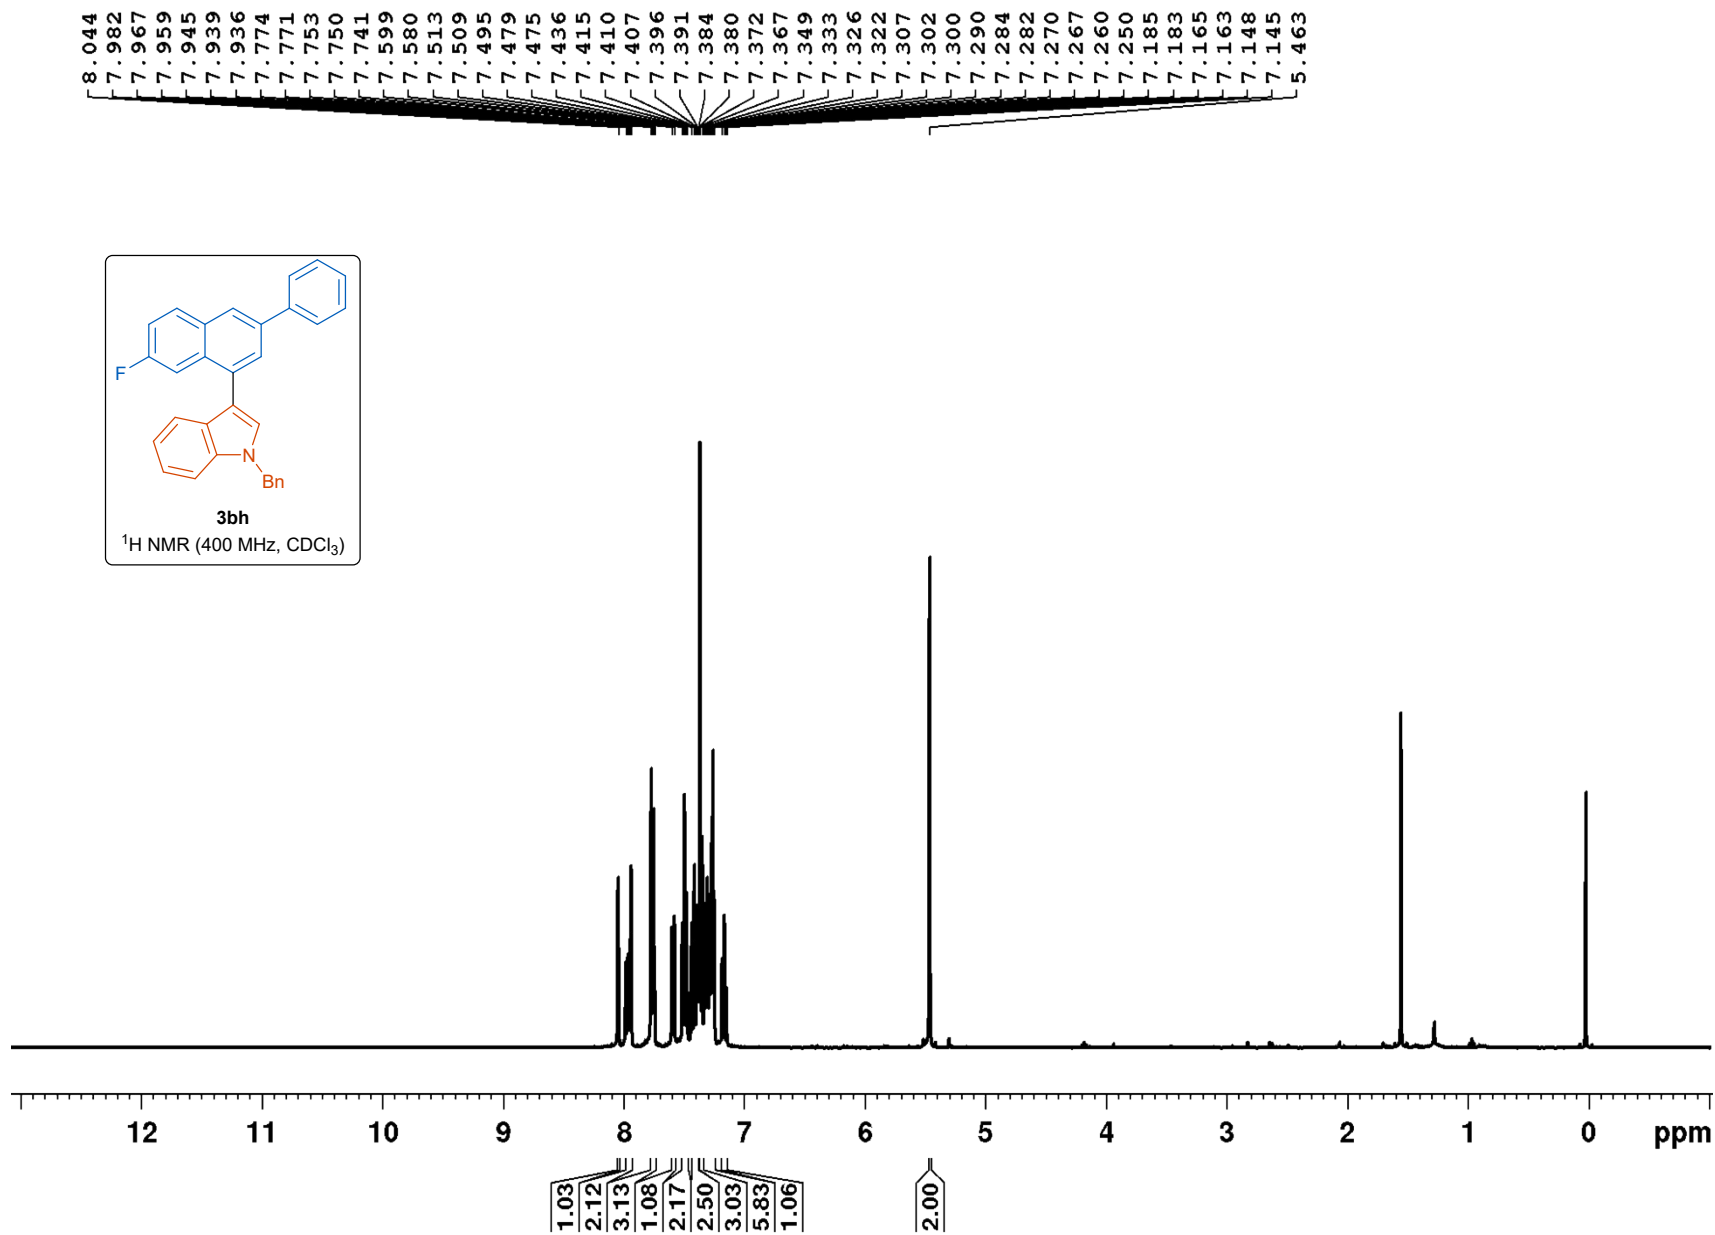

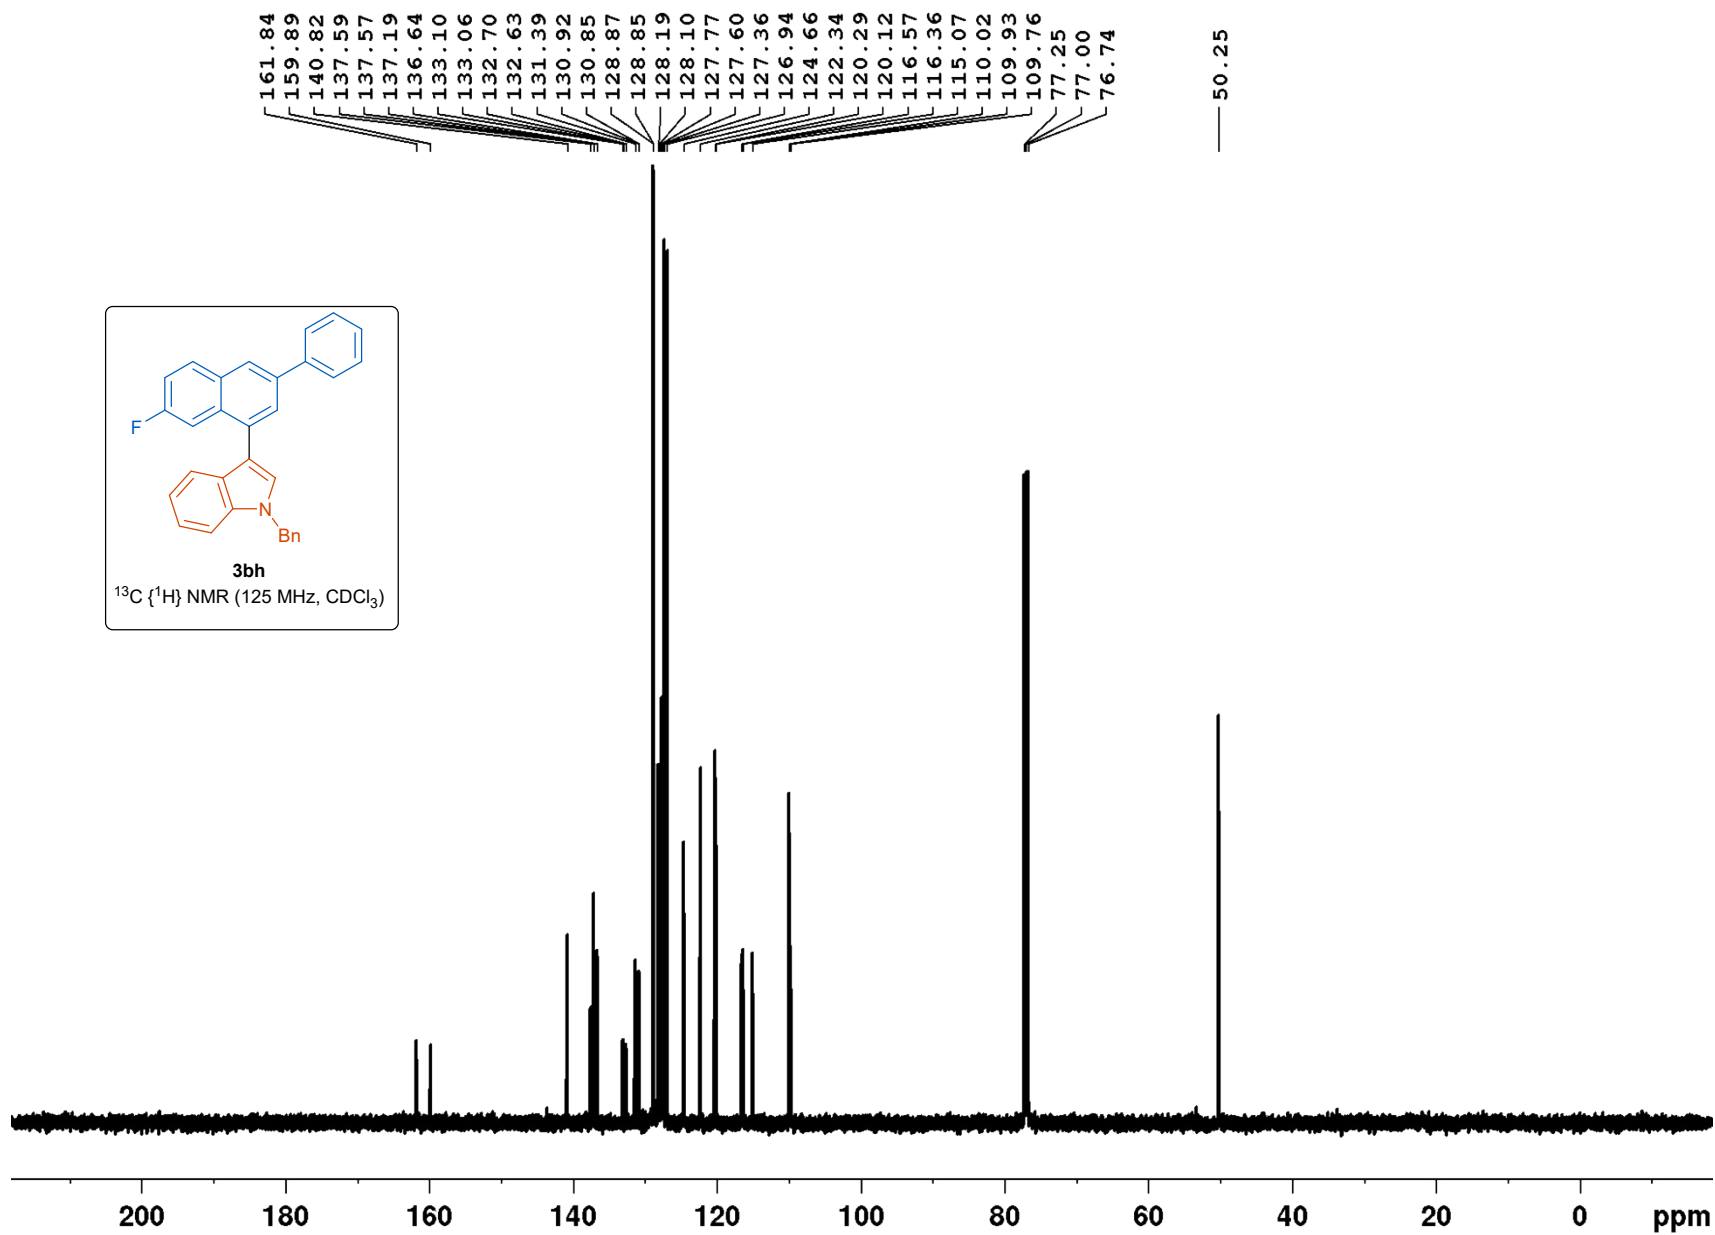

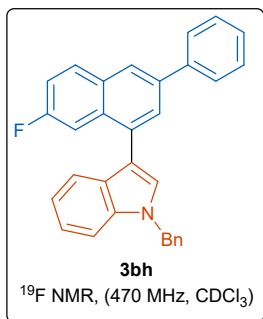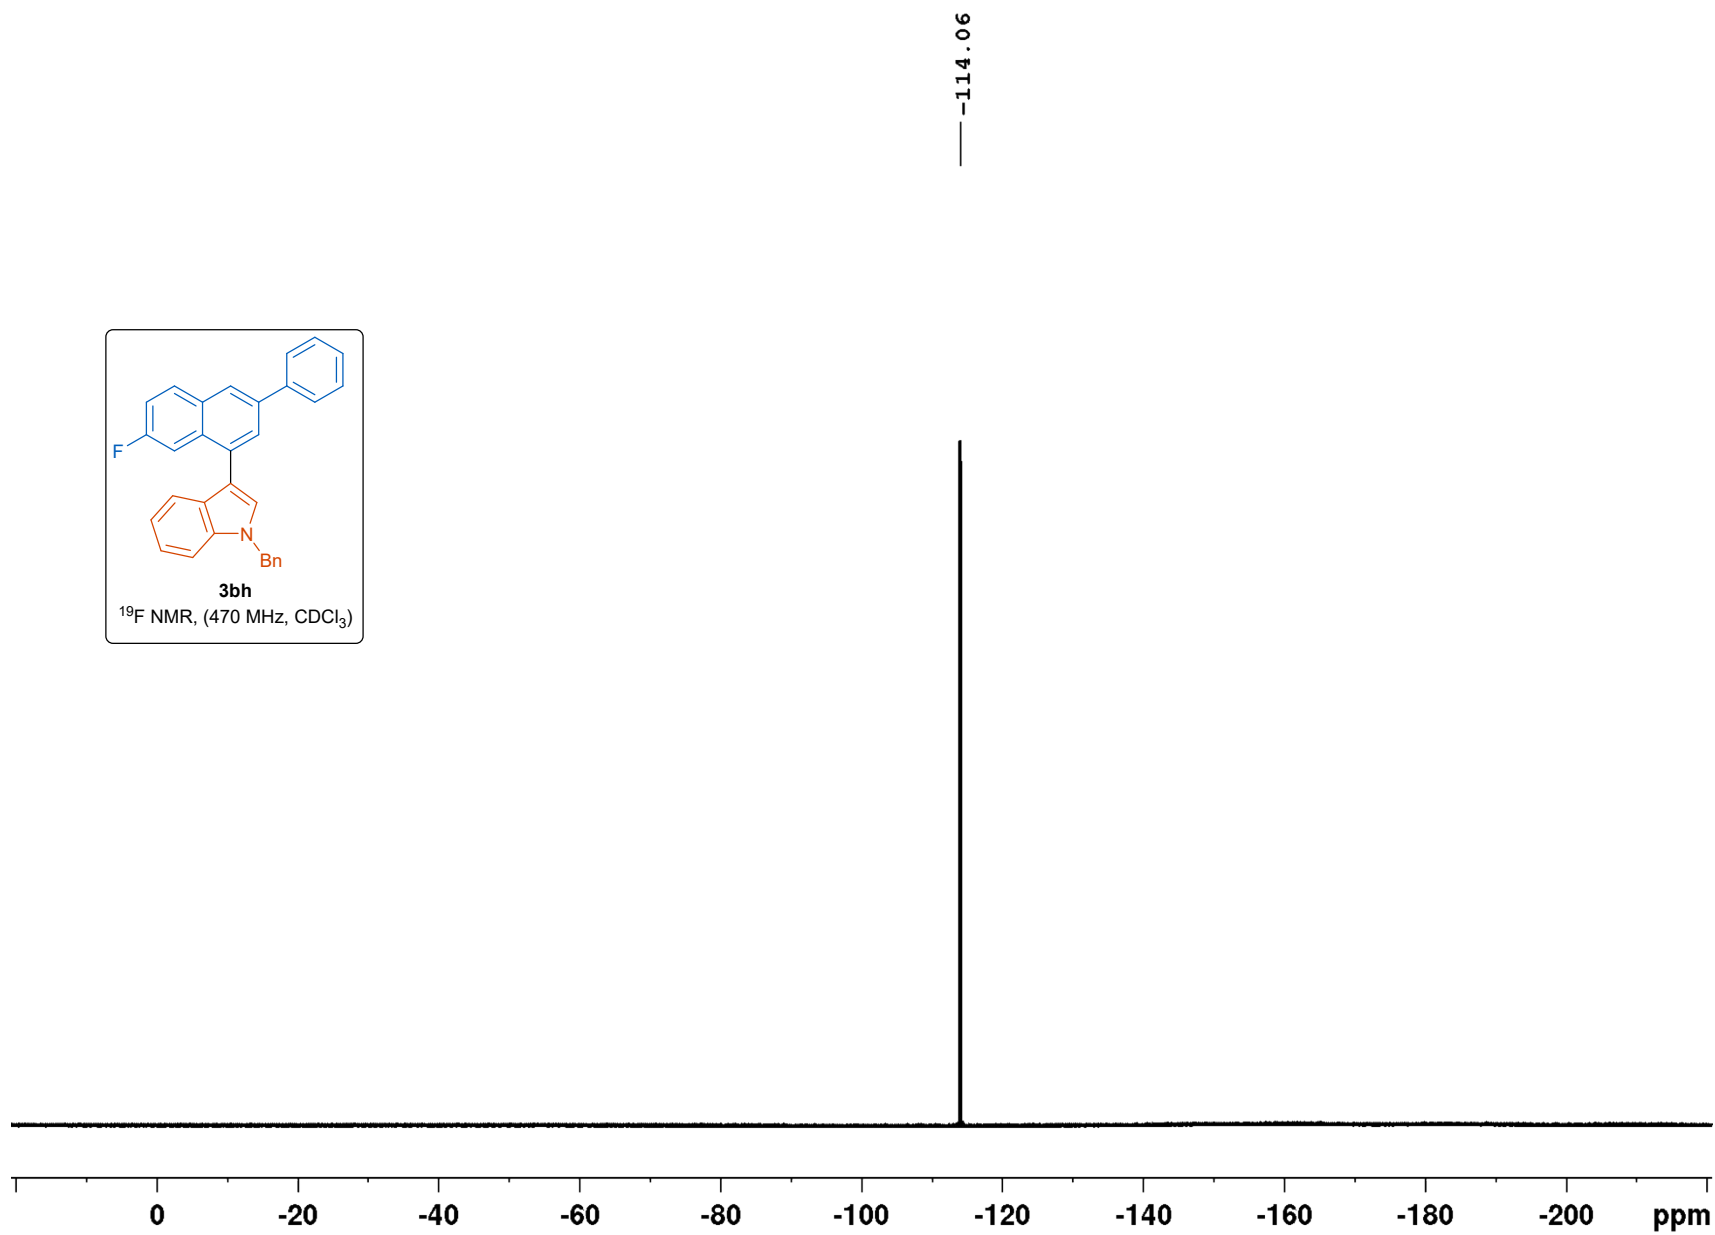



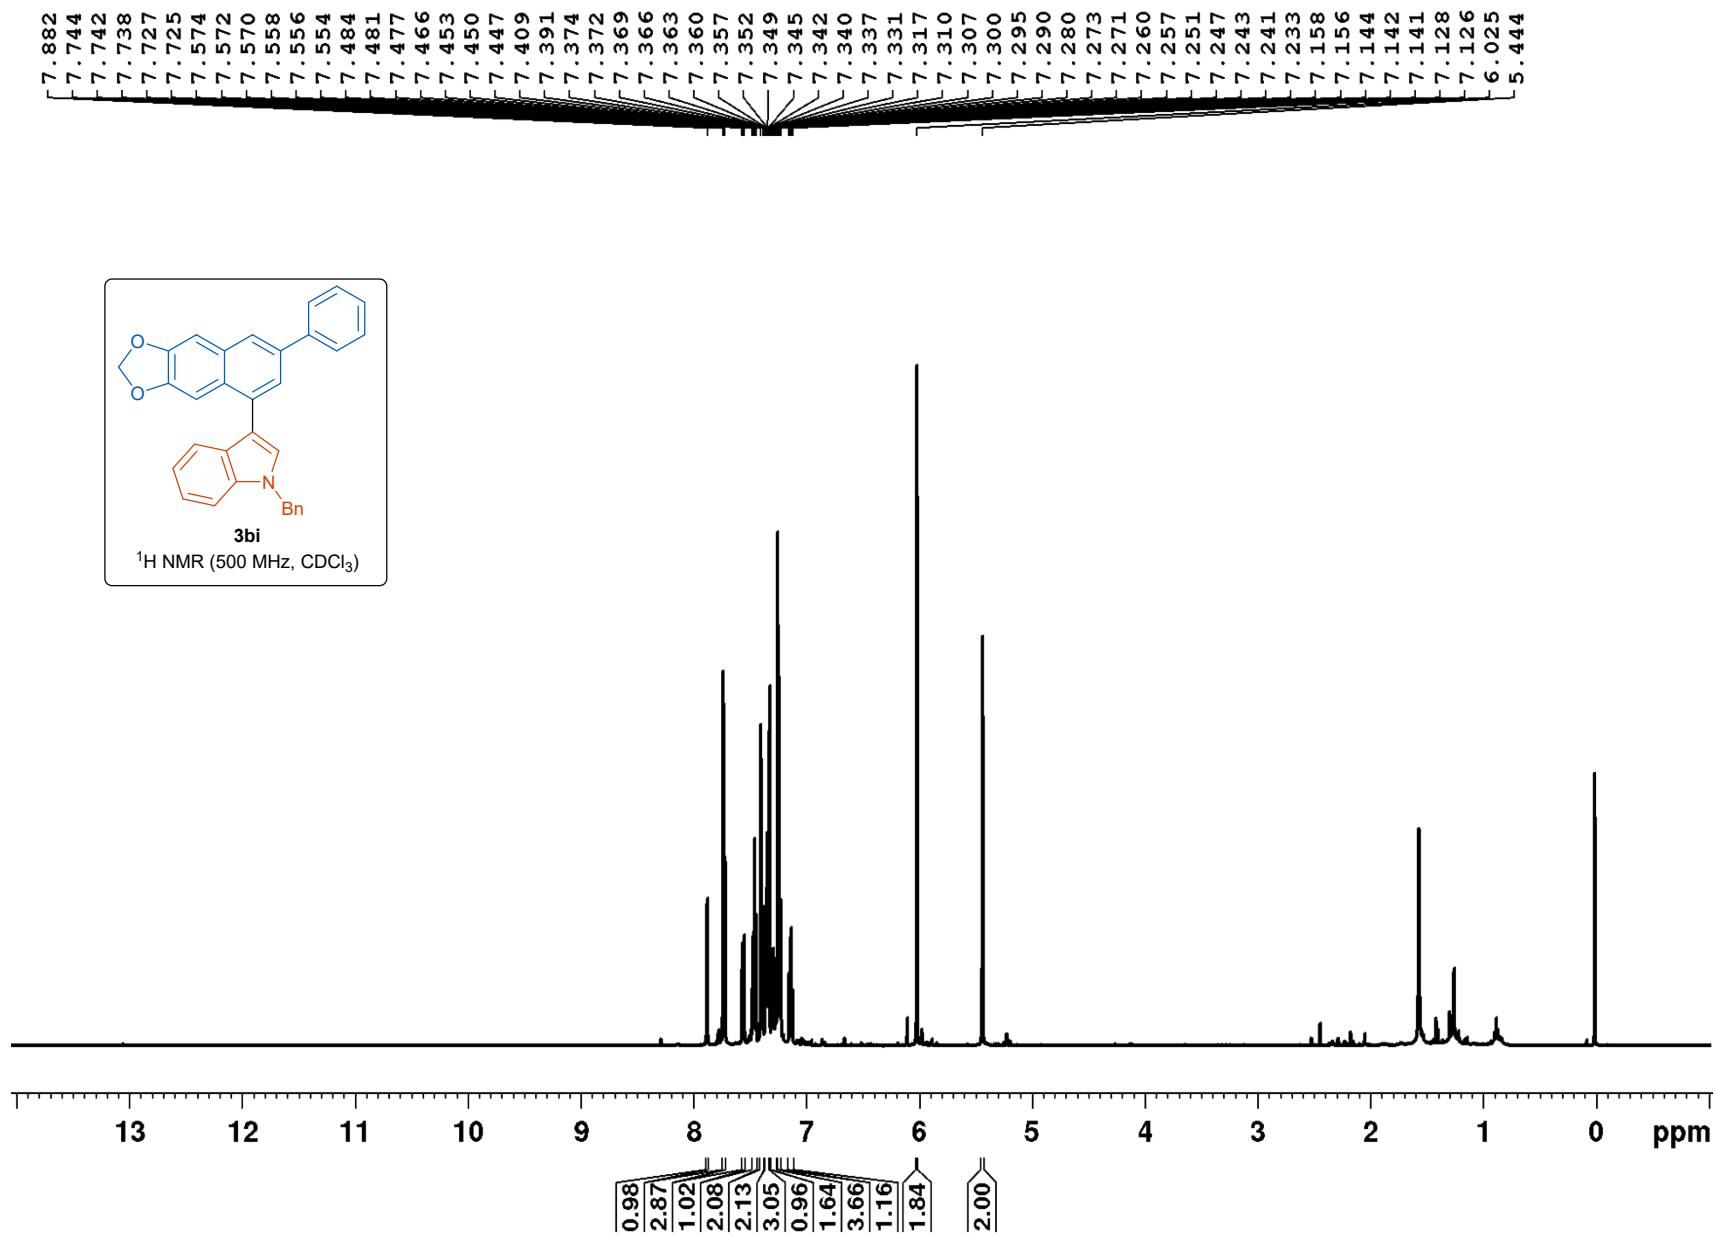

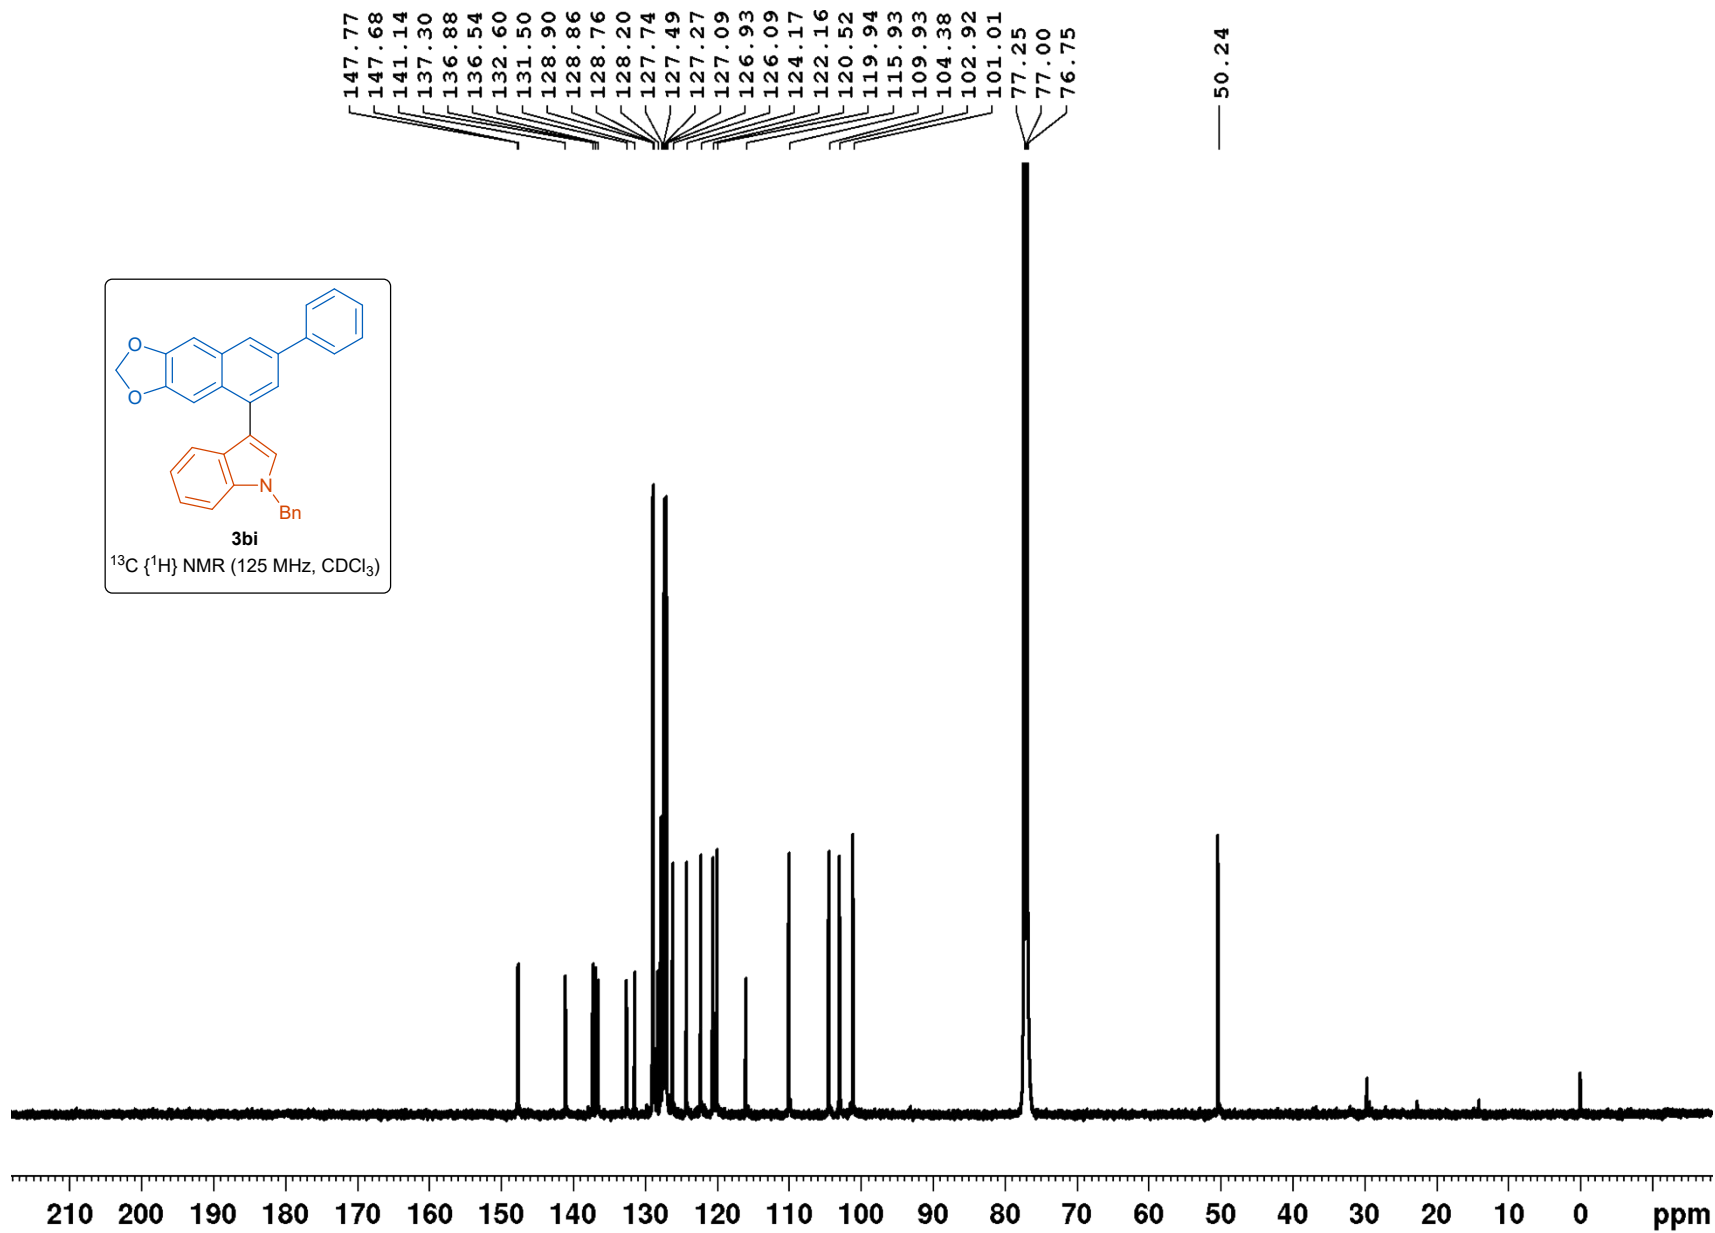

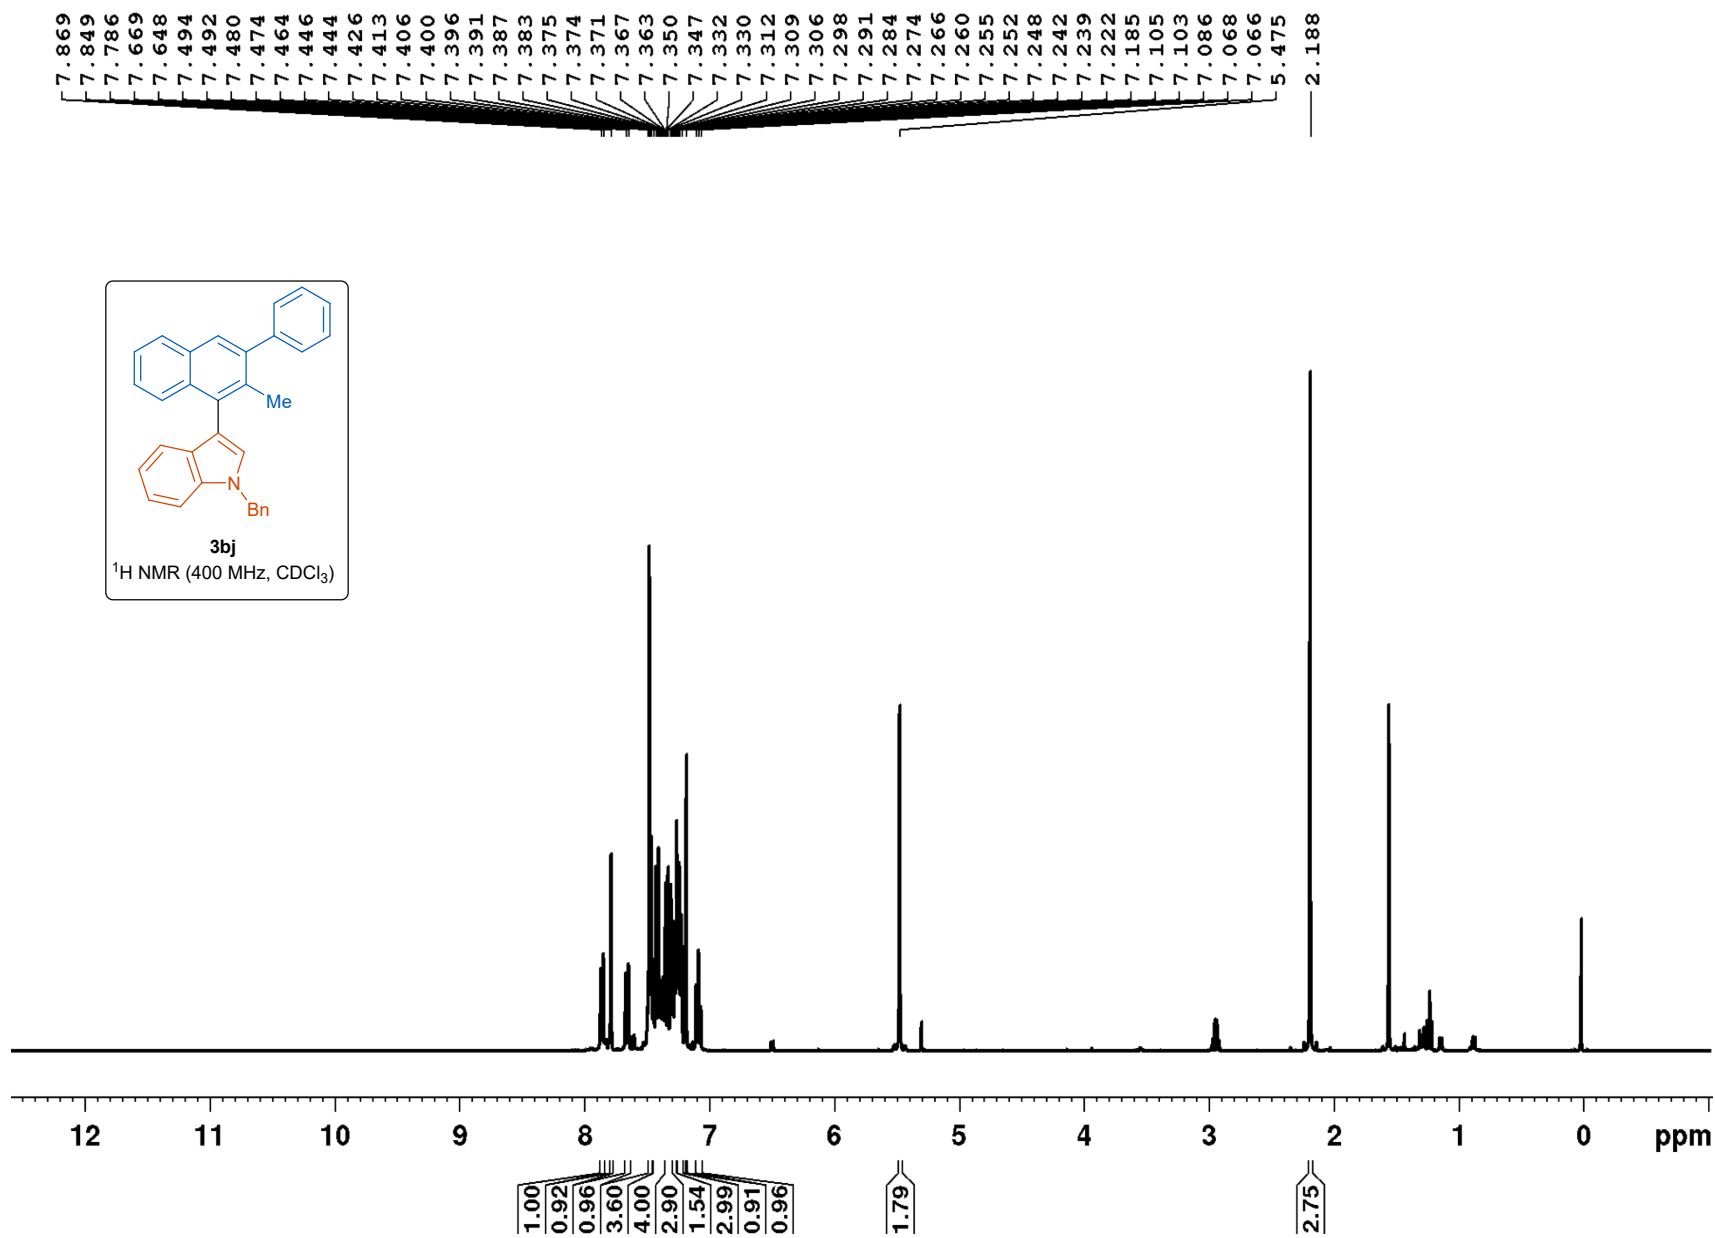

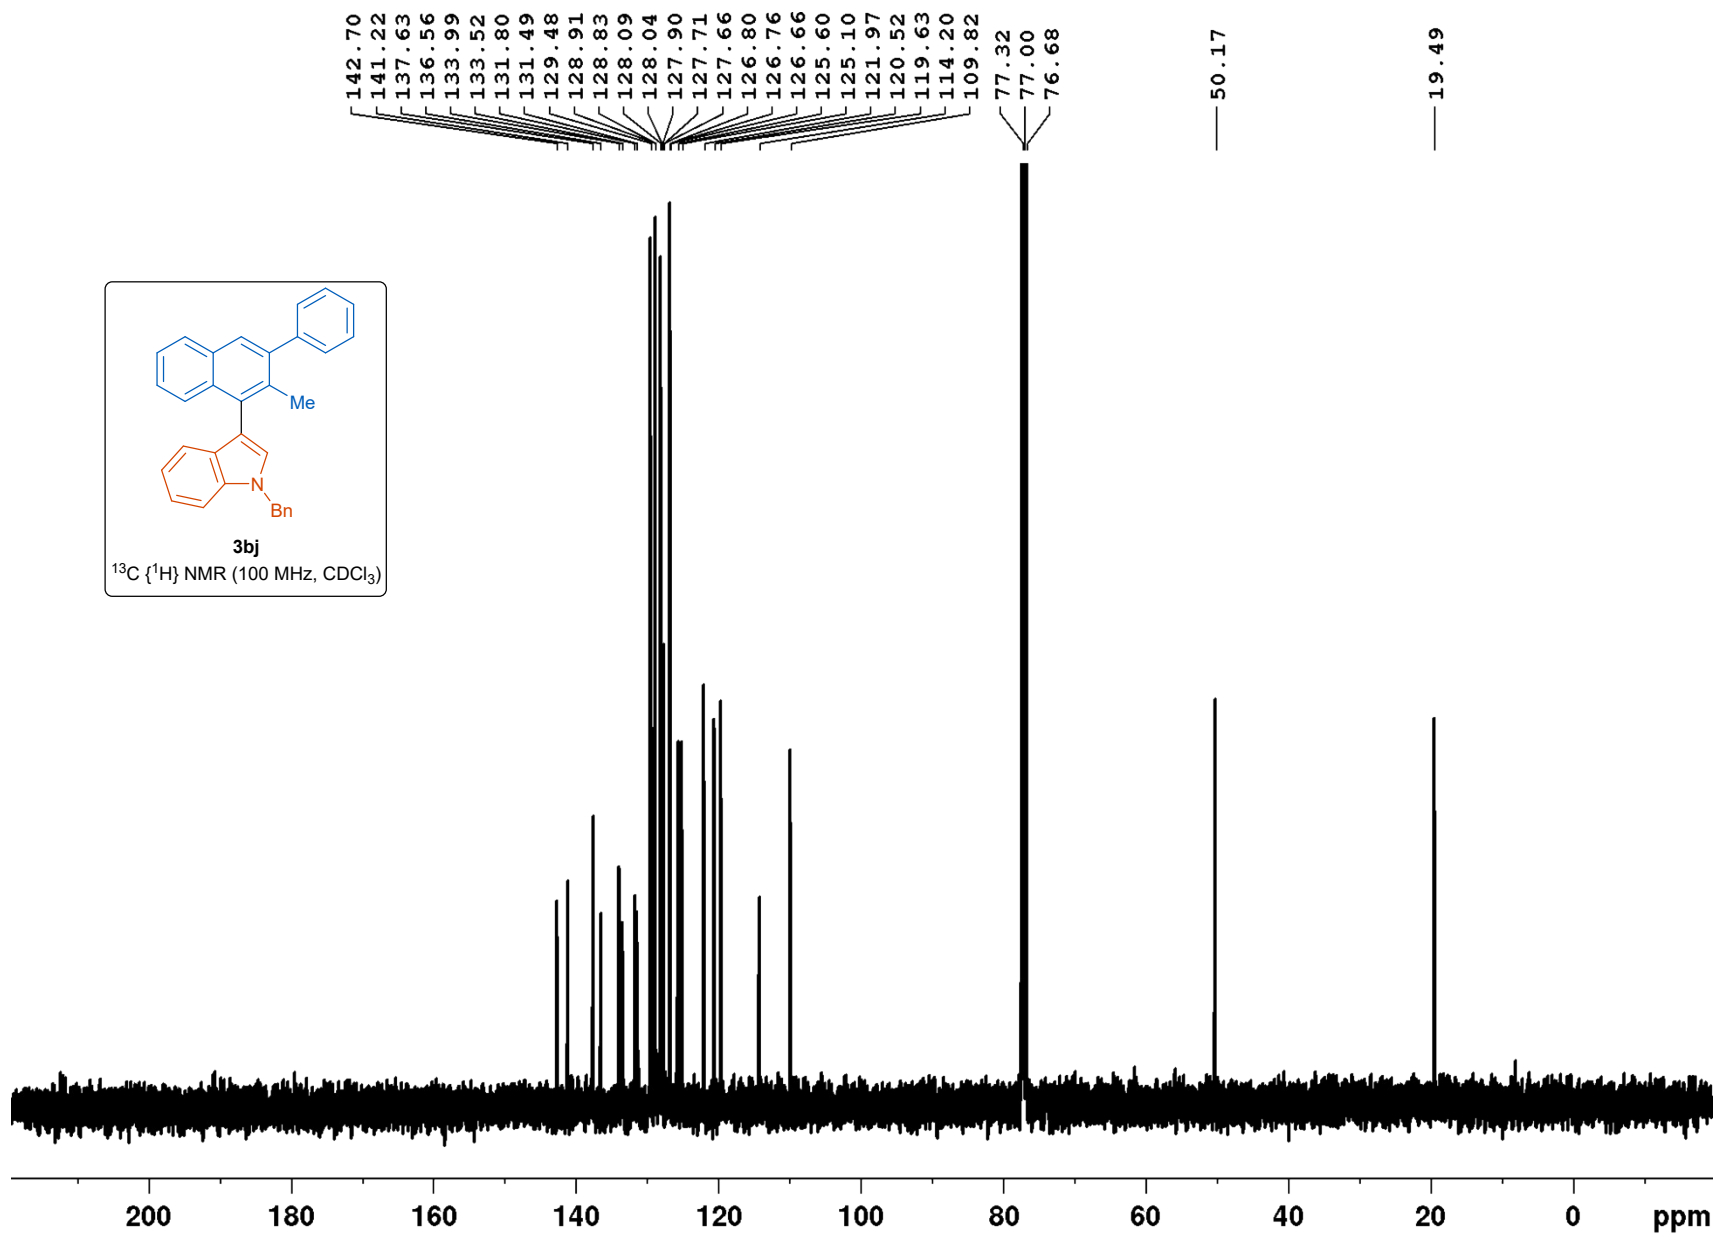

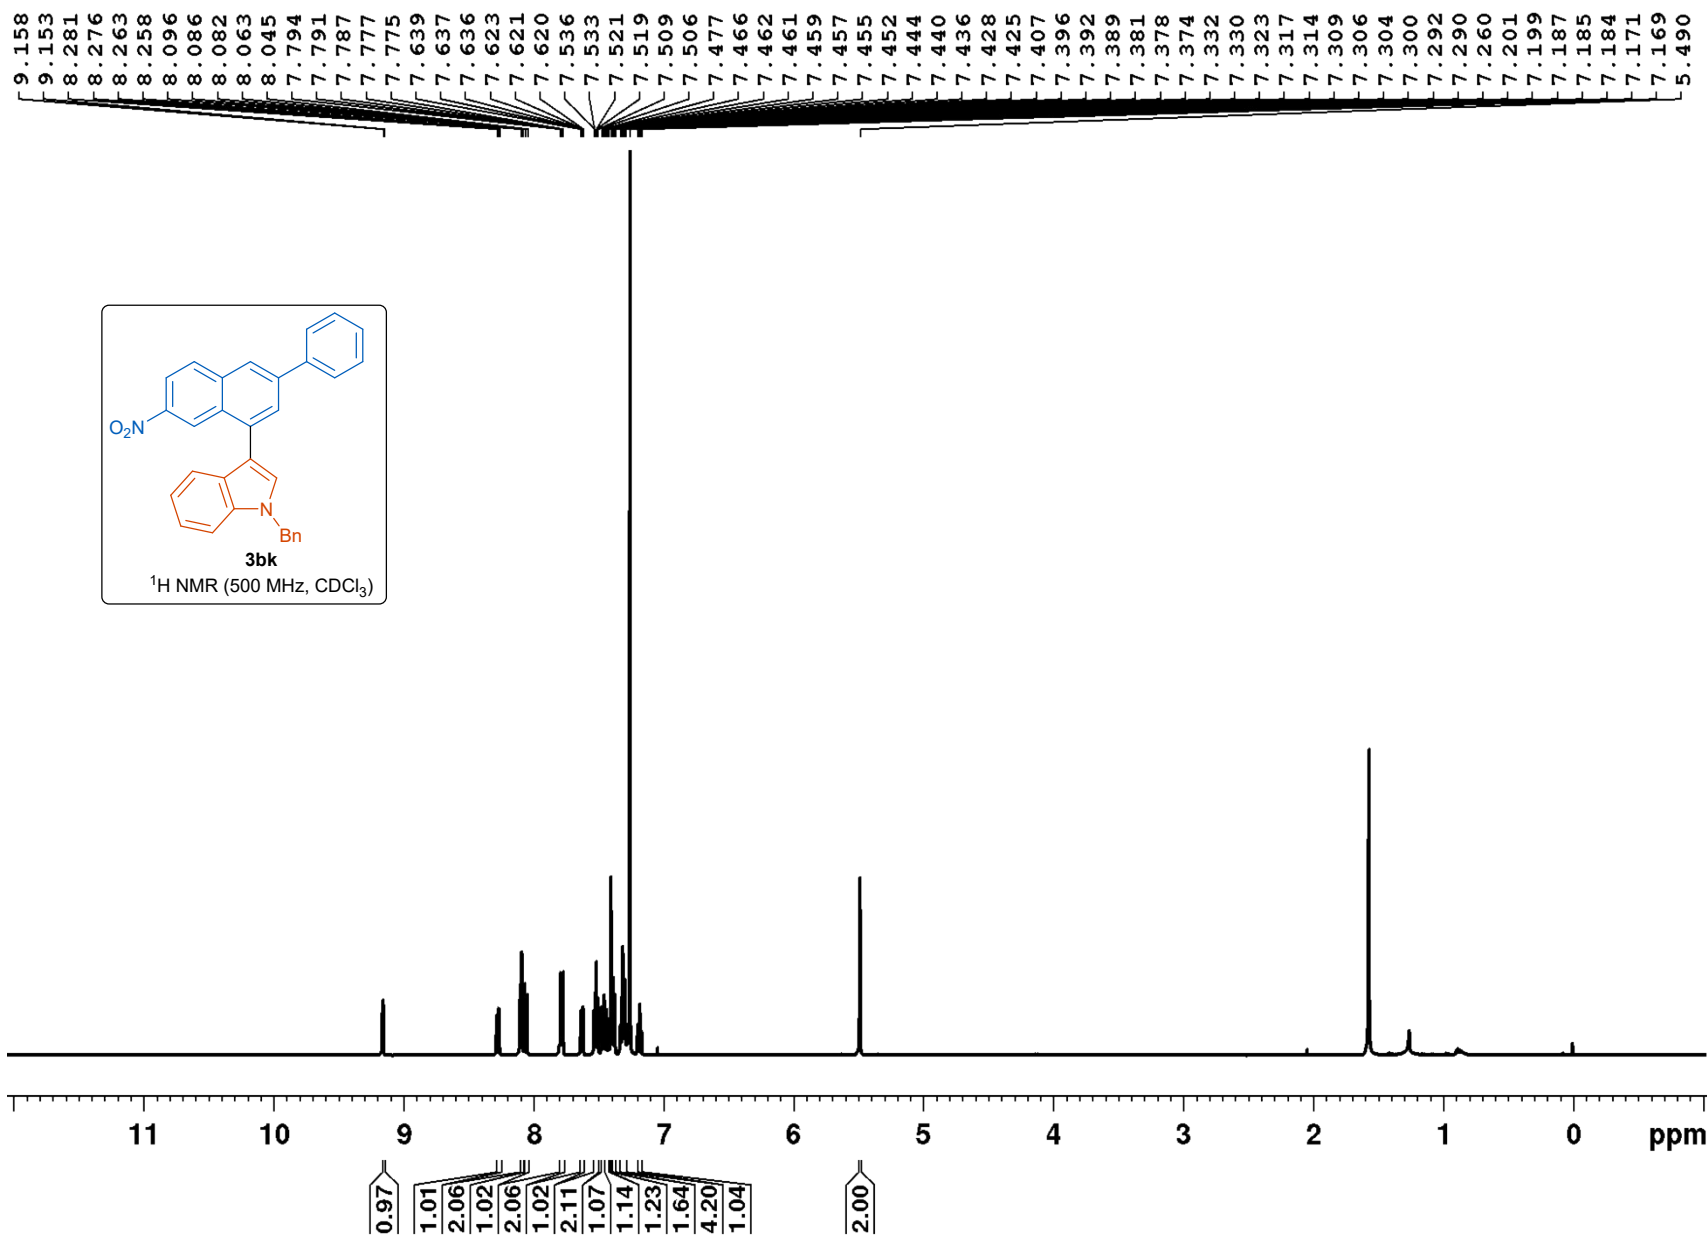

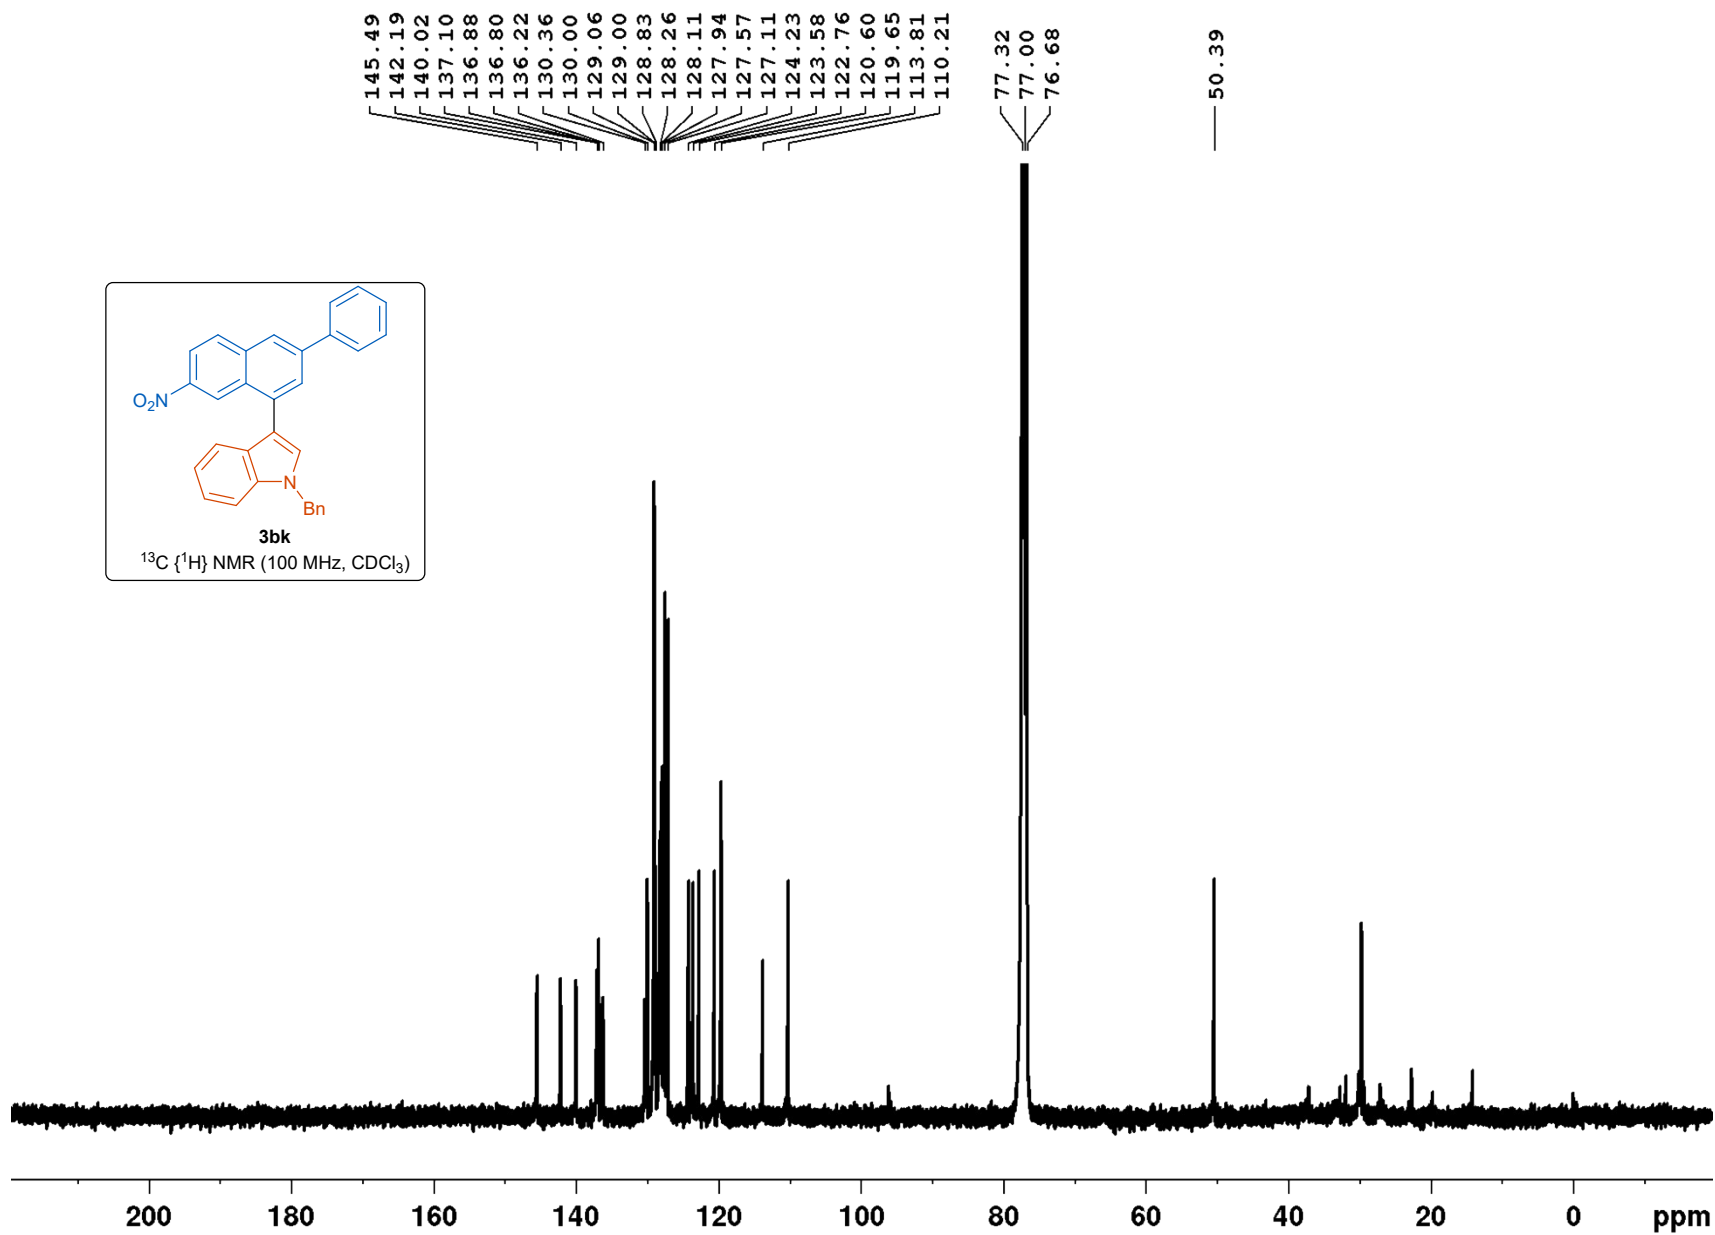

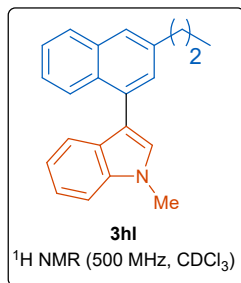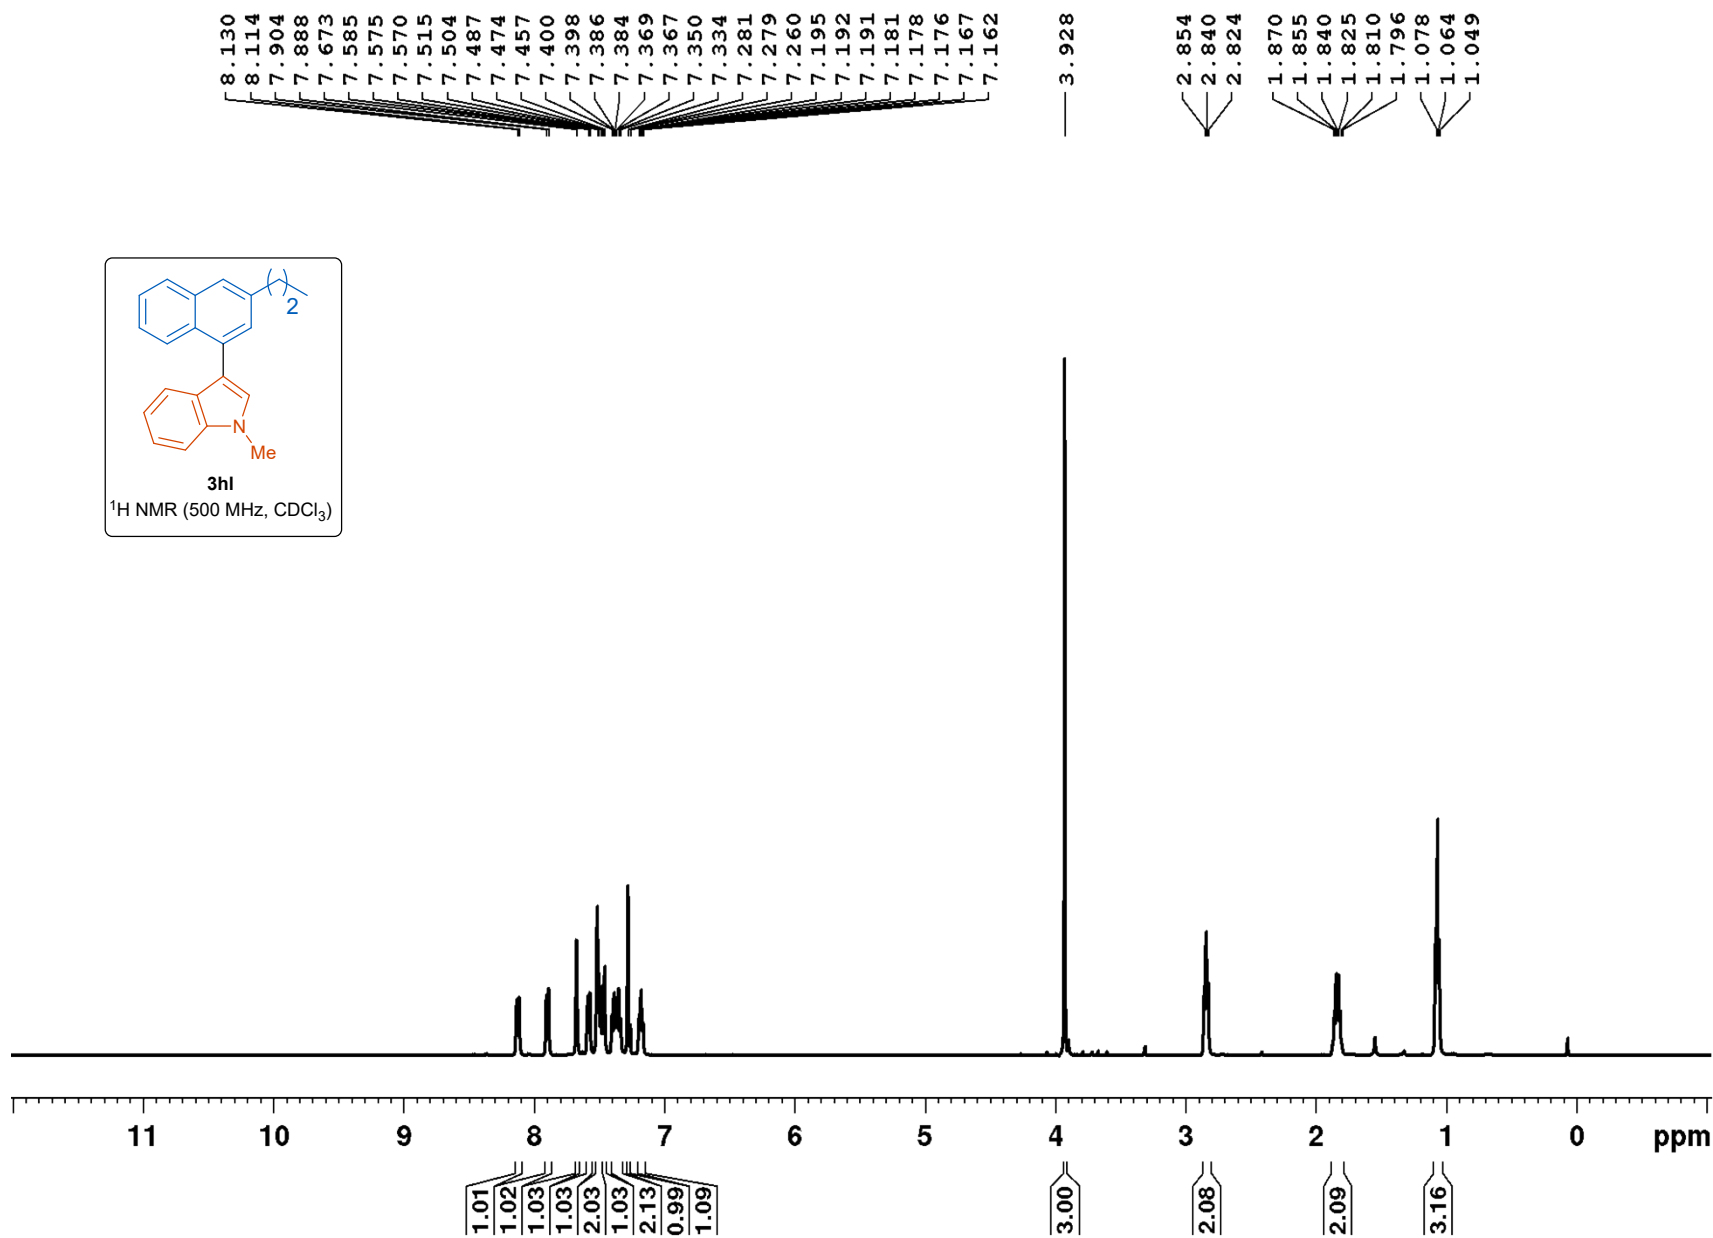





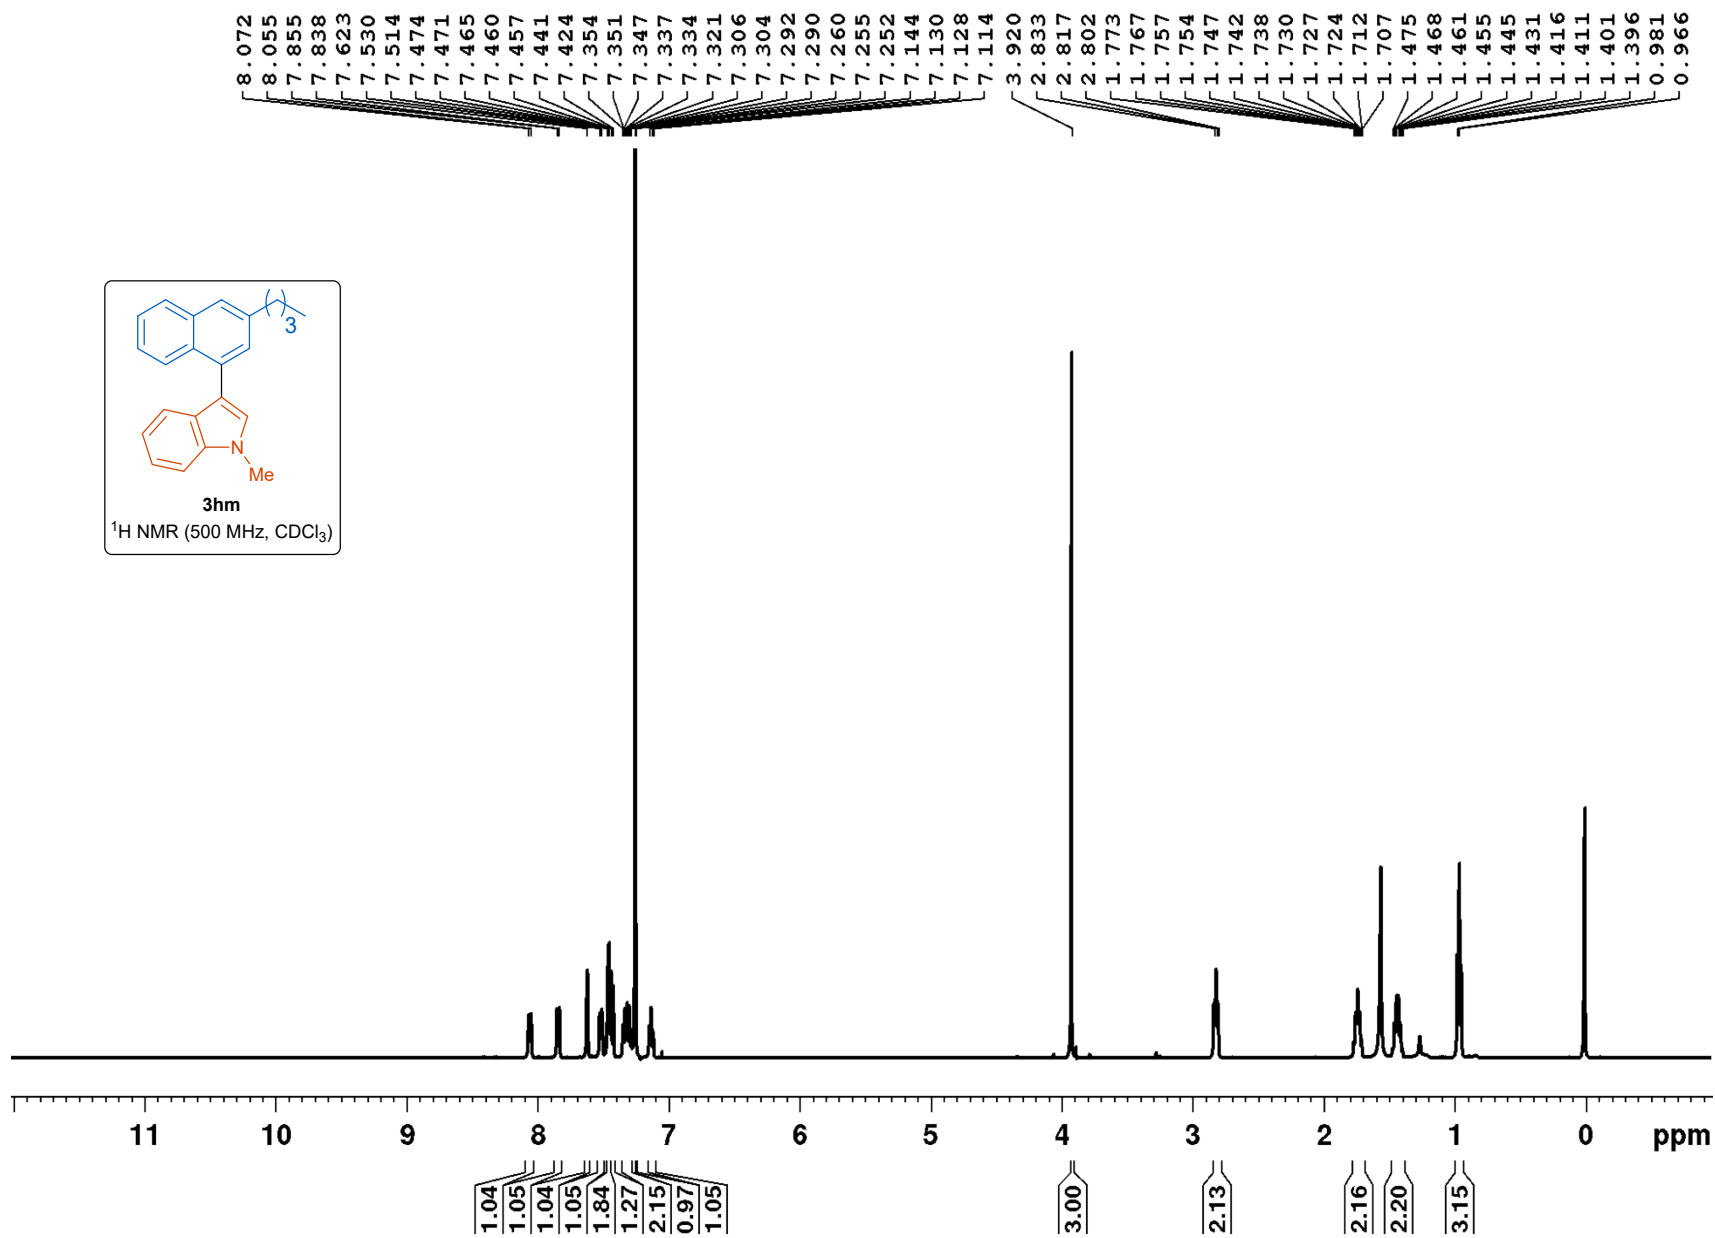

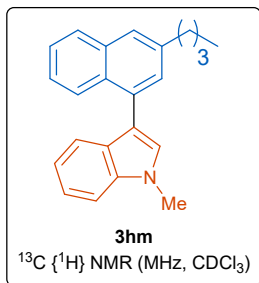

140.06  
 136.92  
 134.27  
 132.76  
 130.96  
 129.25  
 128.18  
 128.07  
 127.73  
 126.35  
 125.64  
 125.39  
 124.76  
 121.89  
 120.45  
 119.53  
 115.06  
 109.36

77.25  
 77.00  
 76.74

35.80  
 33.53  
 32.84

22.45

14.00

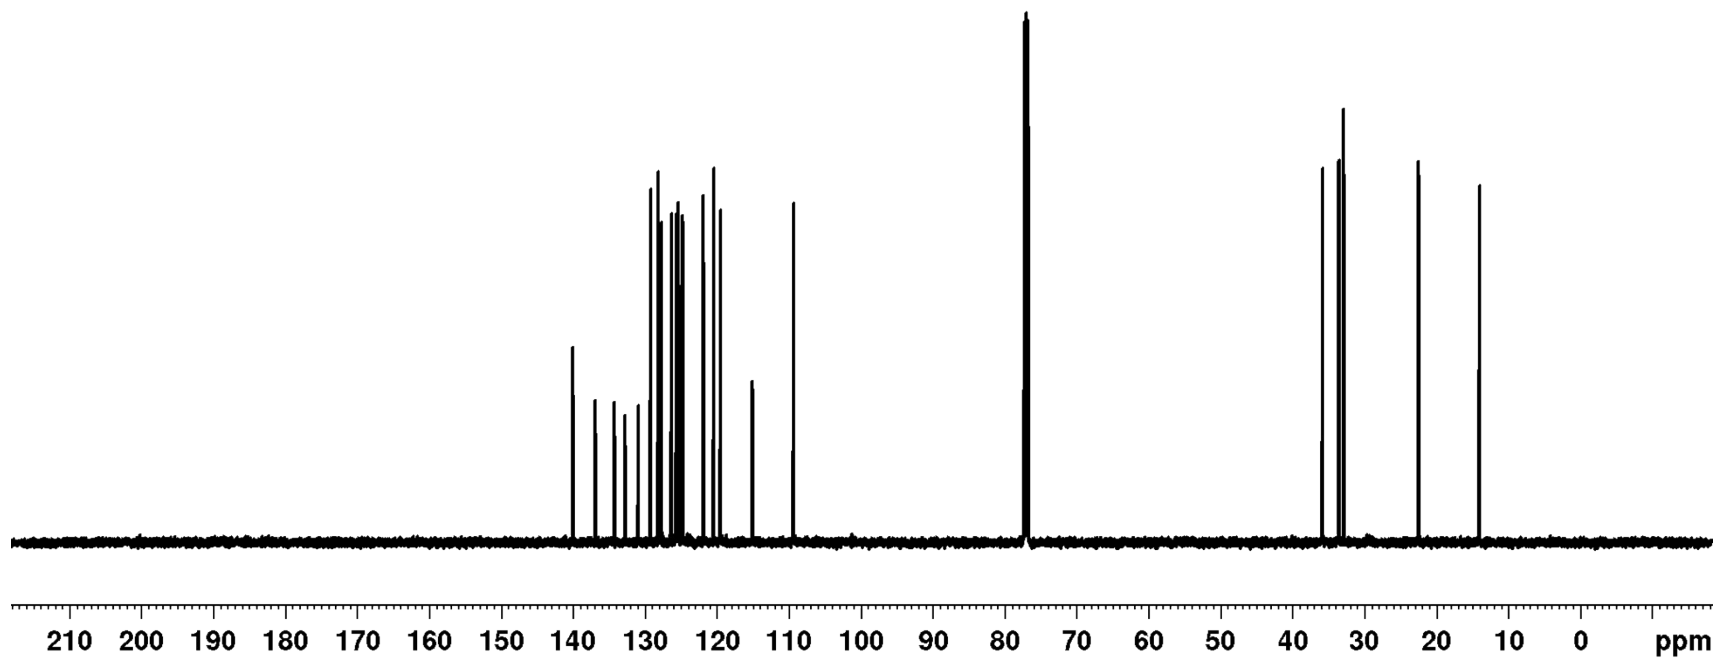

7.989  
7.972  
7.867  
7.850  
7.649  
7.489  
7.483  
7.479  
7.476  
7.459  
7.442  
7.439  
7.380  
7.378  
7.363  
7.349  
7.338  
7.327  
7.313  
7.292  
7.274  
7.260  
7.221  
7.206  
7.197  
7.194  
7.180  
7.176  
5.413

2.842  
2.826  
2.811  
1.776  
1.761  
1.749  
1.734  
1.719  
1.486  
1.471  
1.456  
1.441  
1.426  
1.412  
0.995  
0.980  
0.966

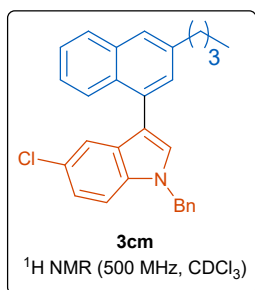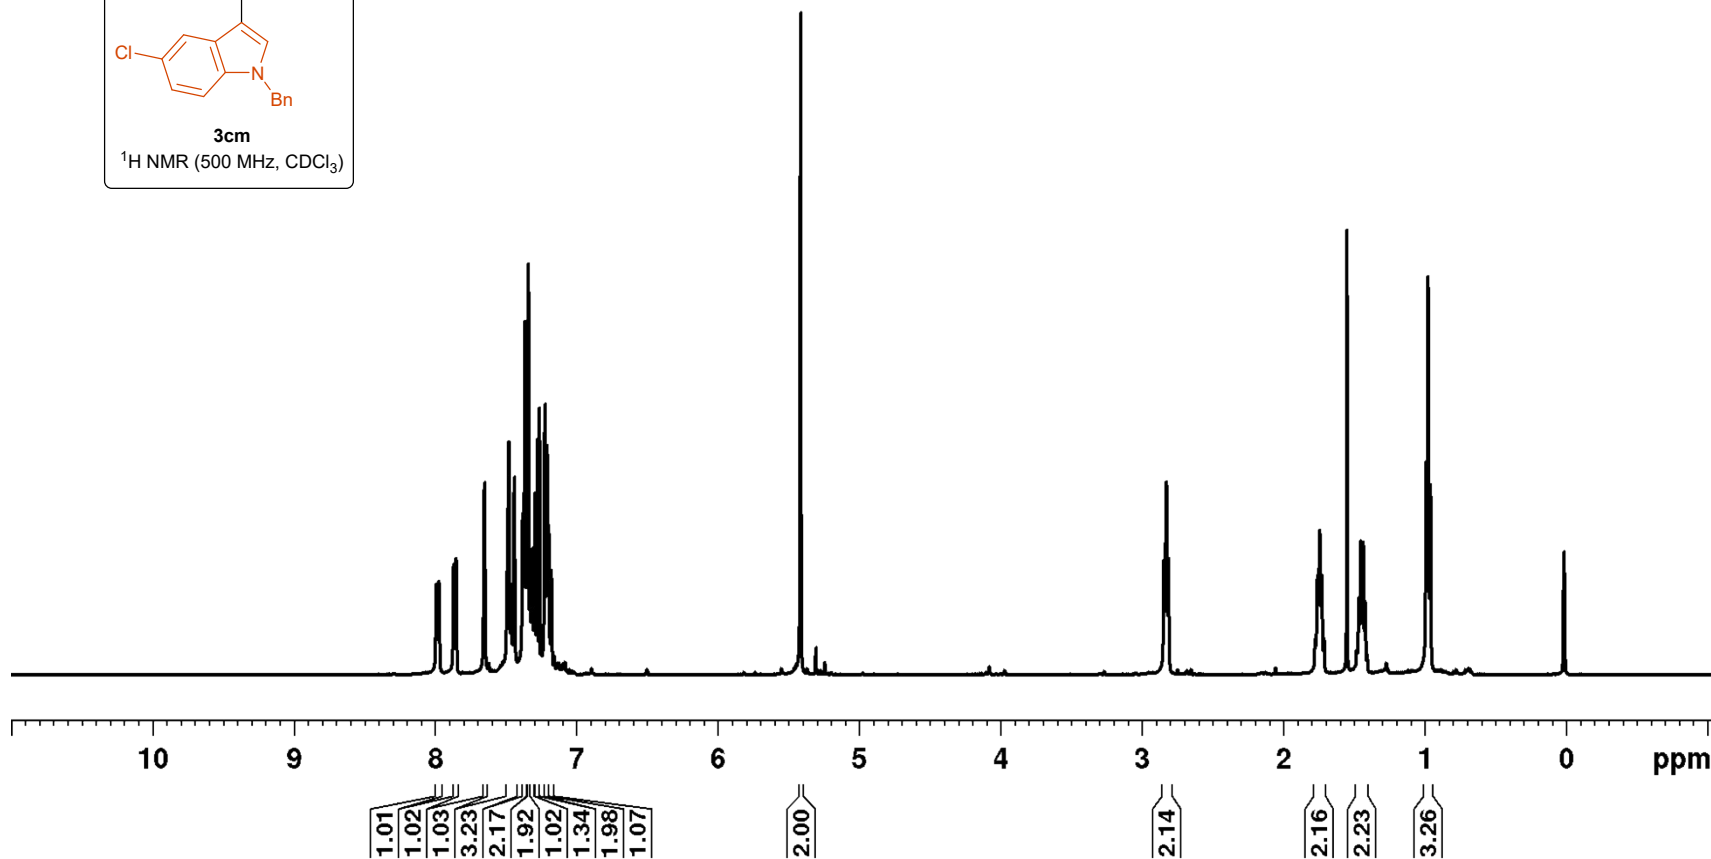

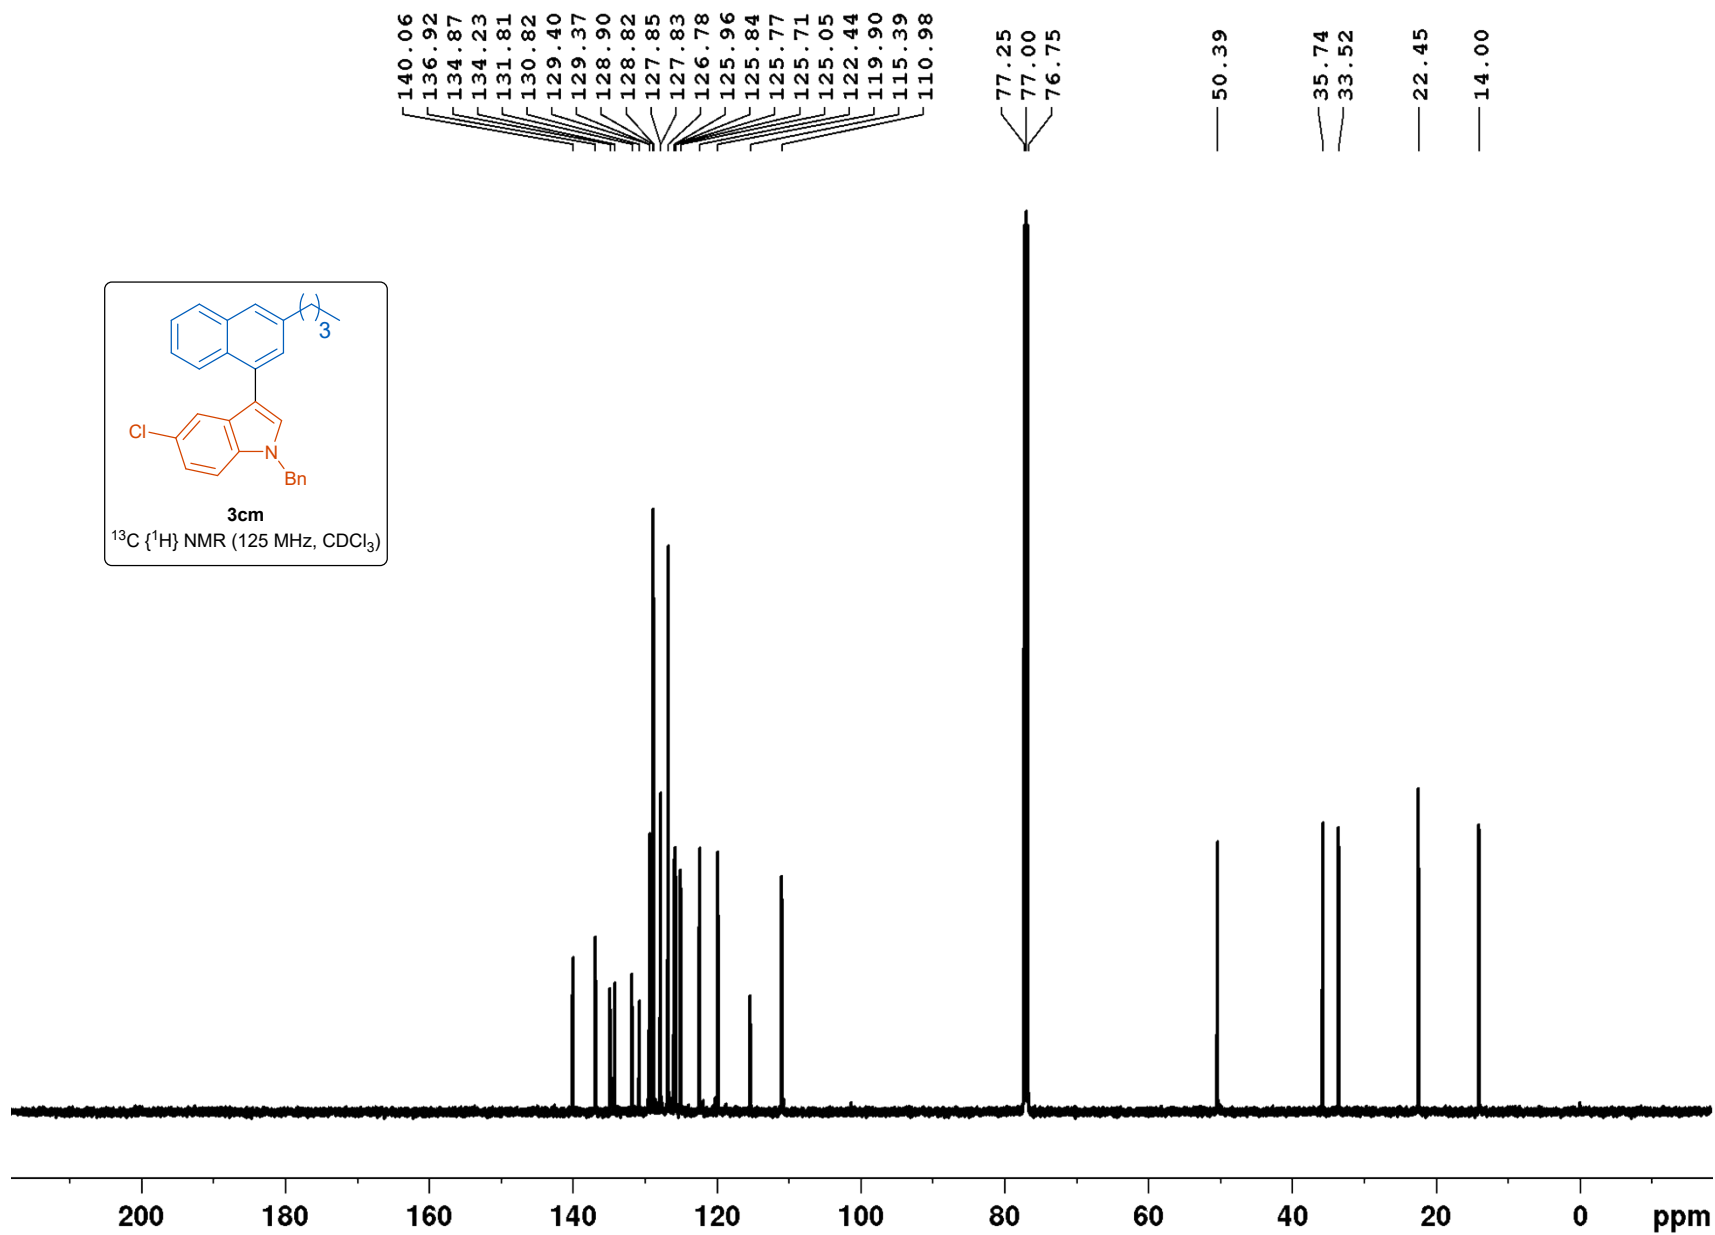

8.042  
 8.021  
 7.878  
 7.858  
 7.651  
 7.502  
 7.499  
 7.485  
 7.481  
 7.478  
 7.462  
 7.458  
 7.394  
 7.391  
 7.388  
 7.383  
 7.373  
 7.367  
 7.356  
 7.352  
 7.347  
 7.337  
 7.334  
 7.330  
 7.323  
 7.316  
 7.308  
 7.296  
 7.285  
 7.274  
 7.263  
 7.260  
 7.241  
 7.237  
 7.220  
 7.198  
 7.192  
 7.174  
 7.168  
 7.016  
 7.010  
 6.994  
 6.987  
 6.971  
 6.965  
 5.418  
 2.827  
 2.808  
 2.788  
 1.847  
 1.828  
 1.809  
 1.790  
 1.772  
 1.754  
 1.051  
 1.033  
 1.015

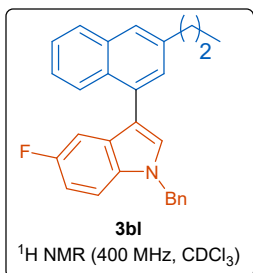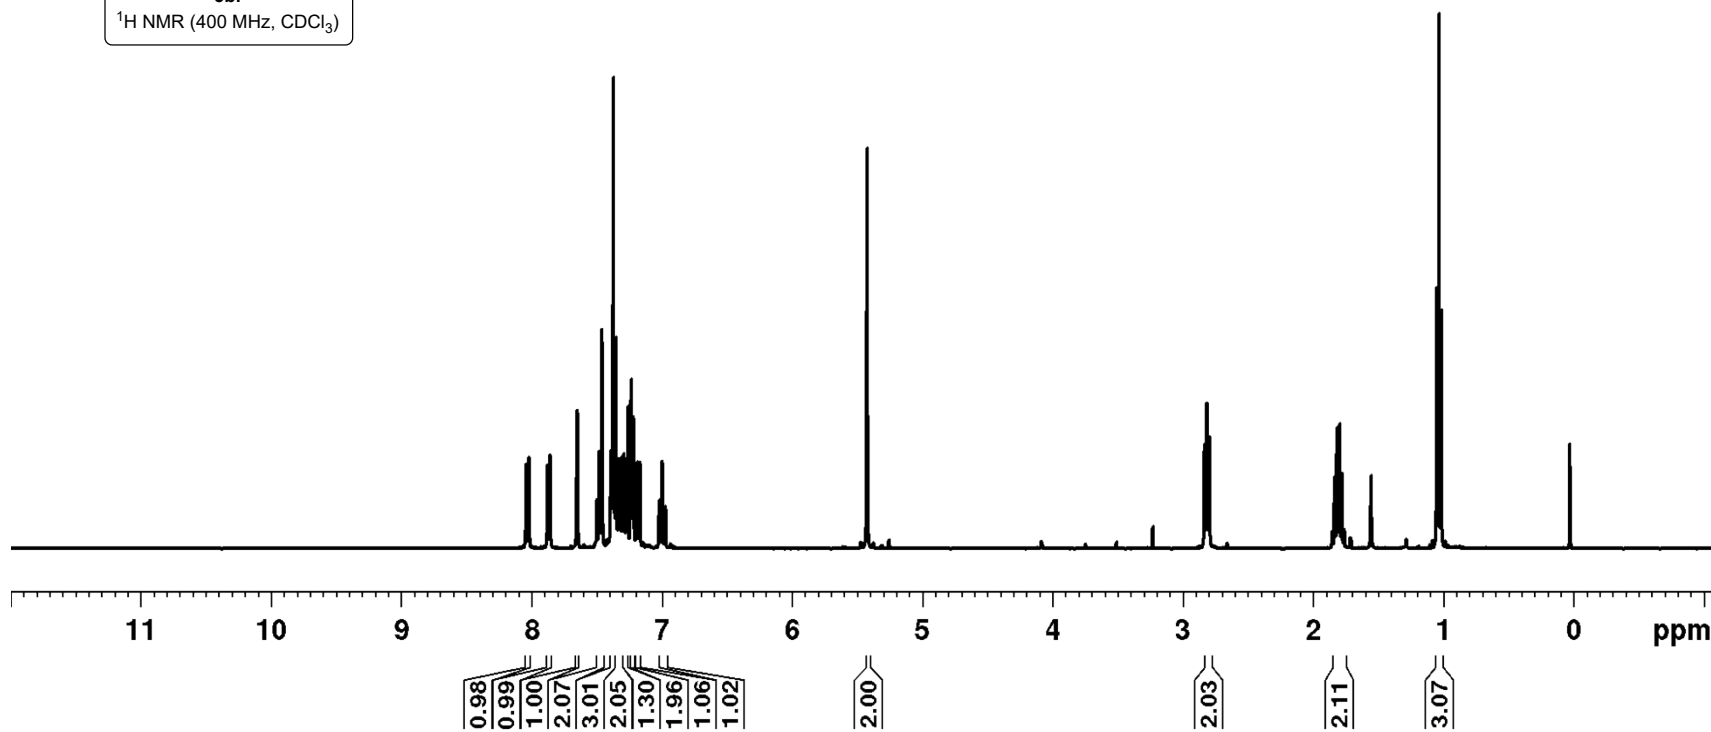

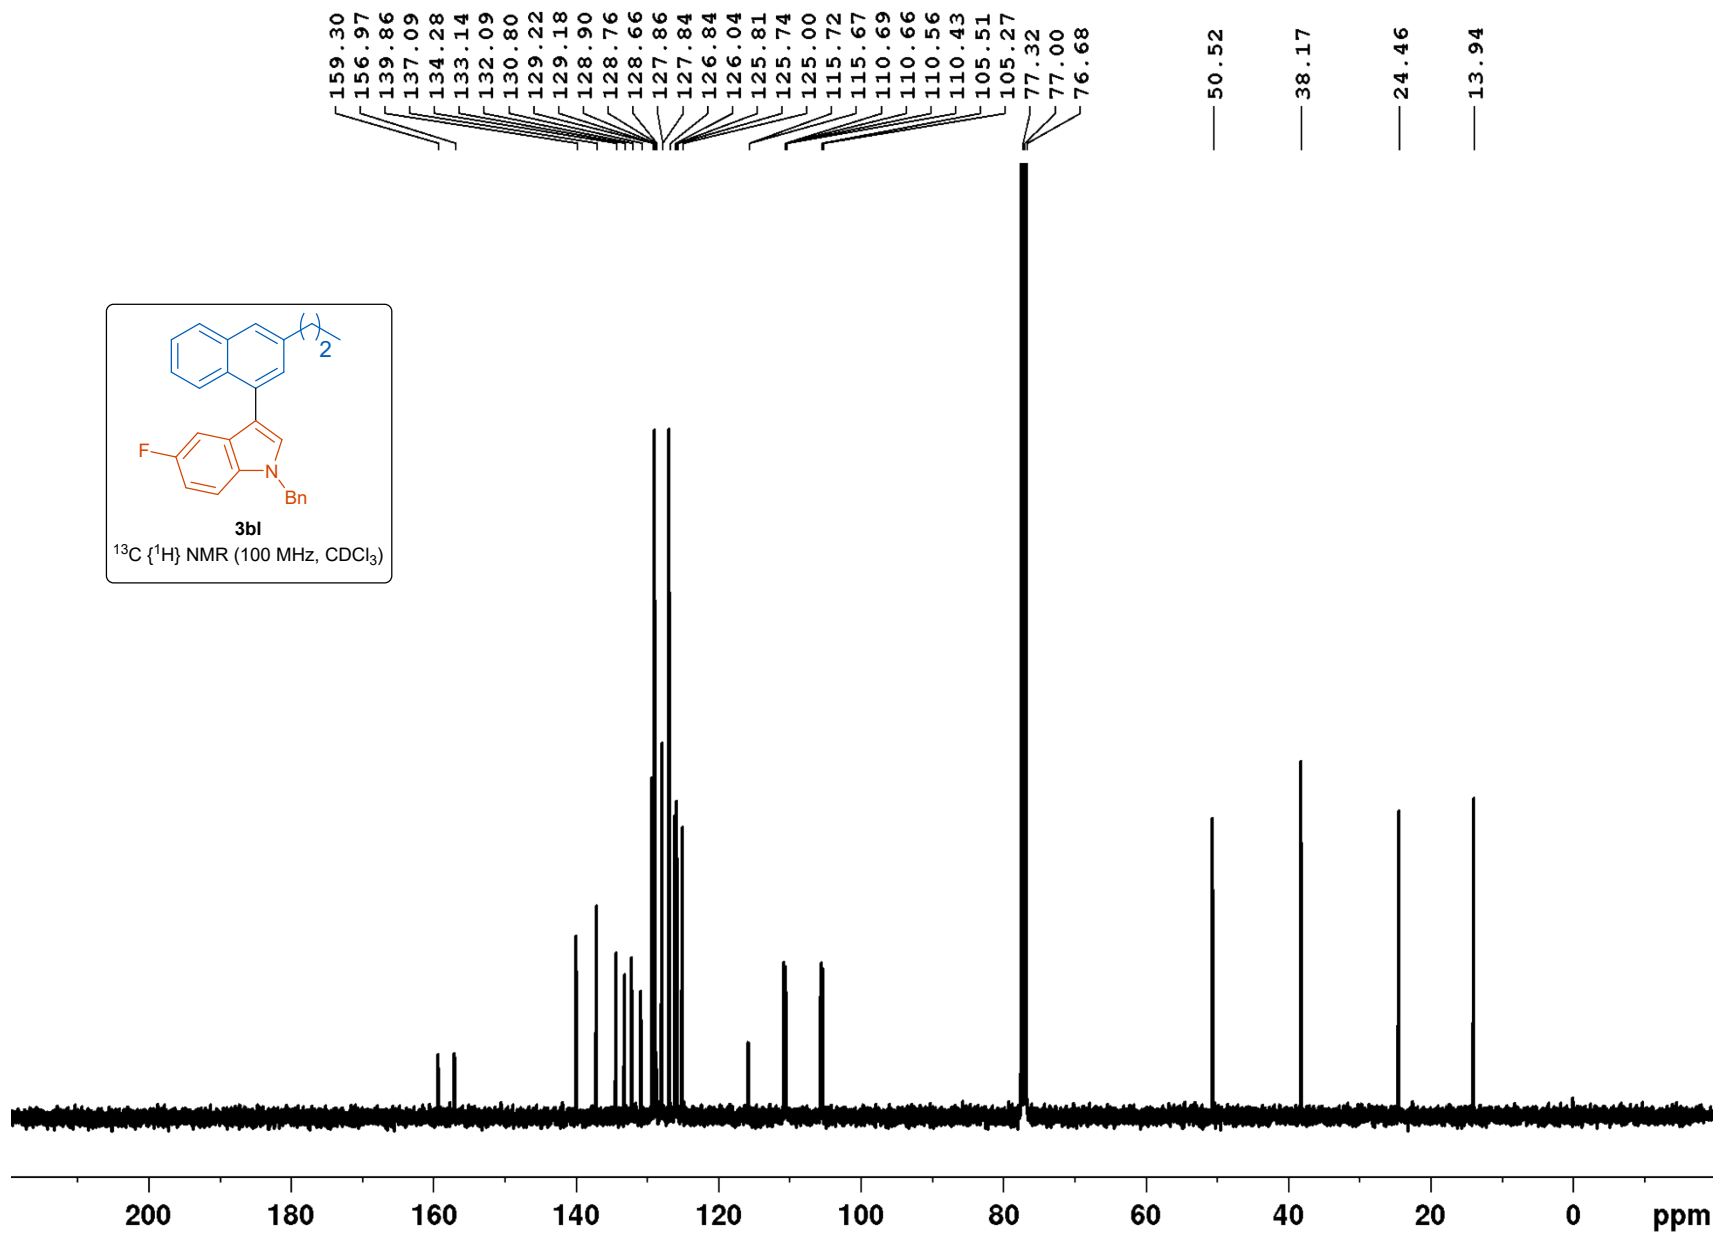

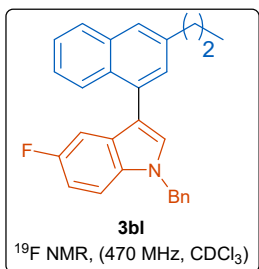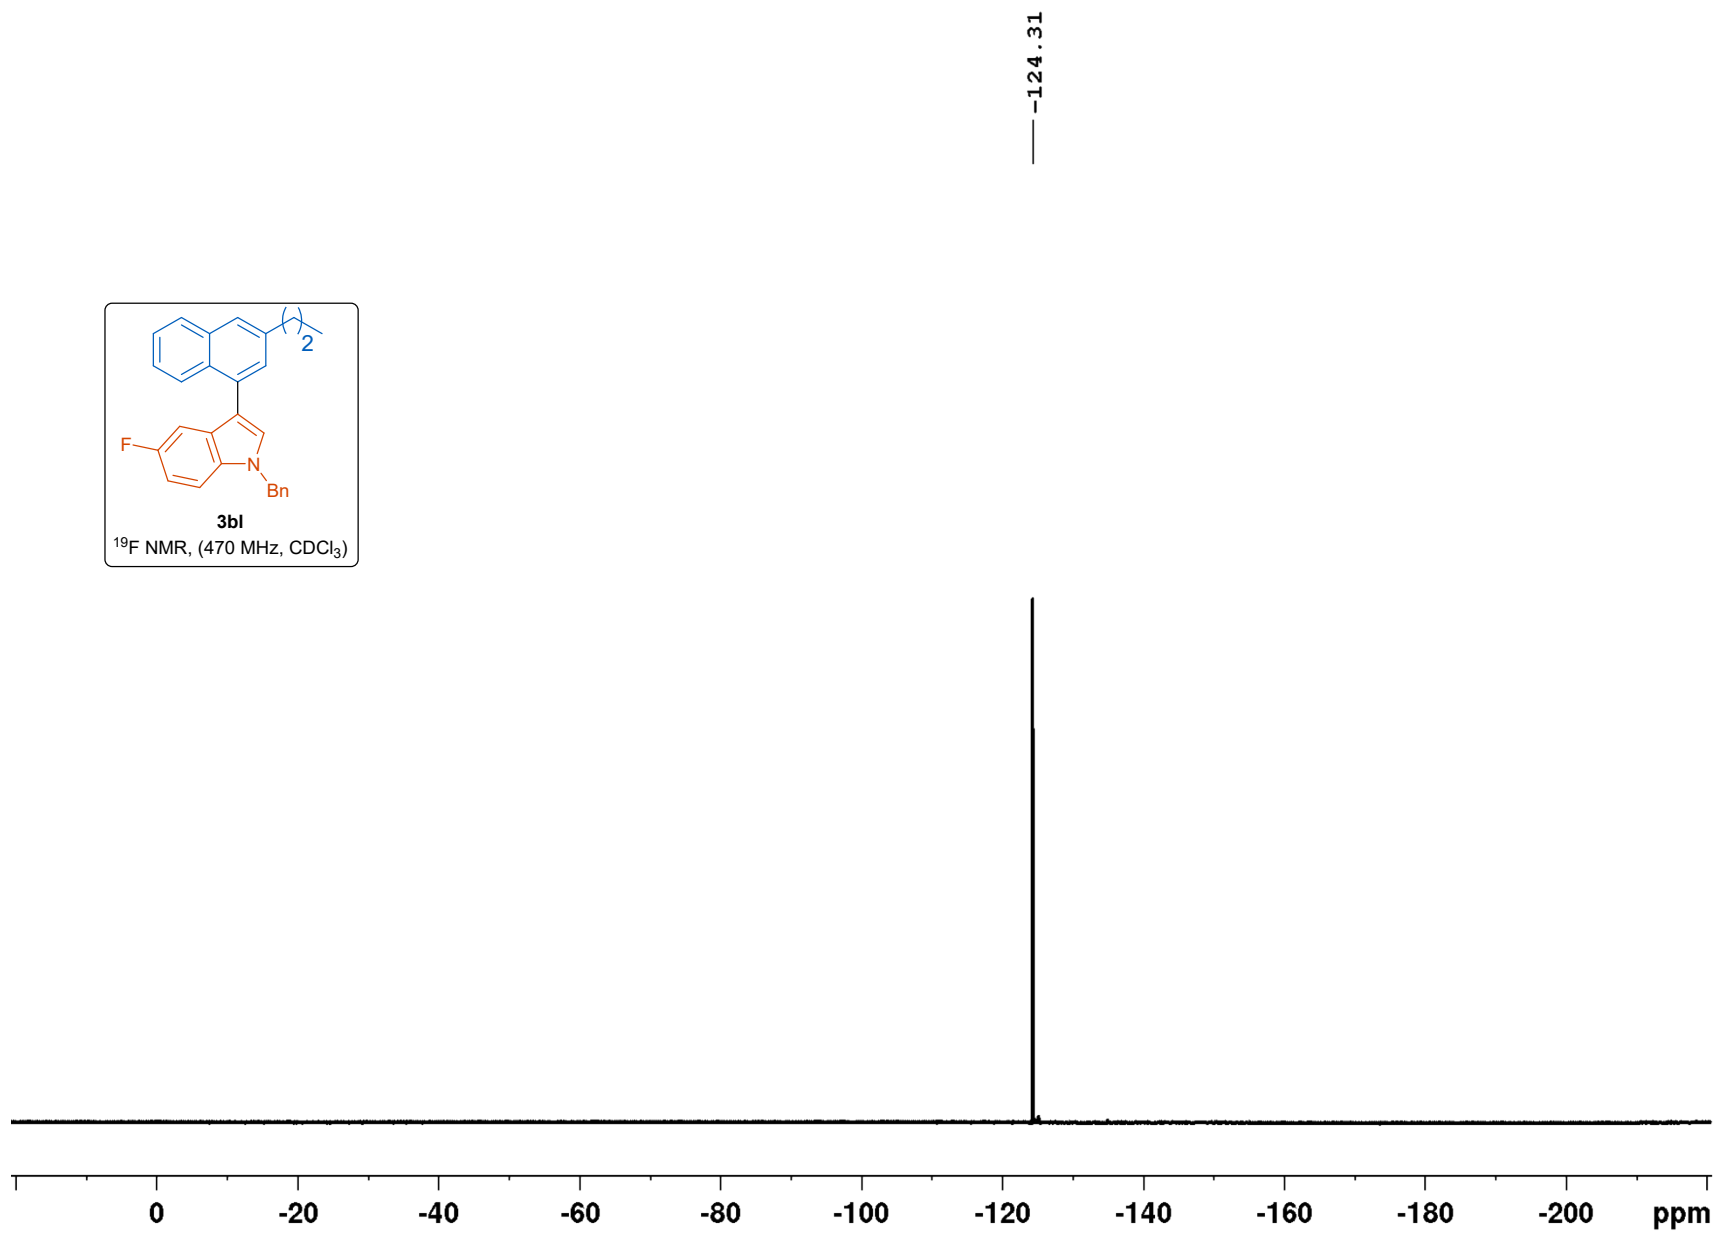

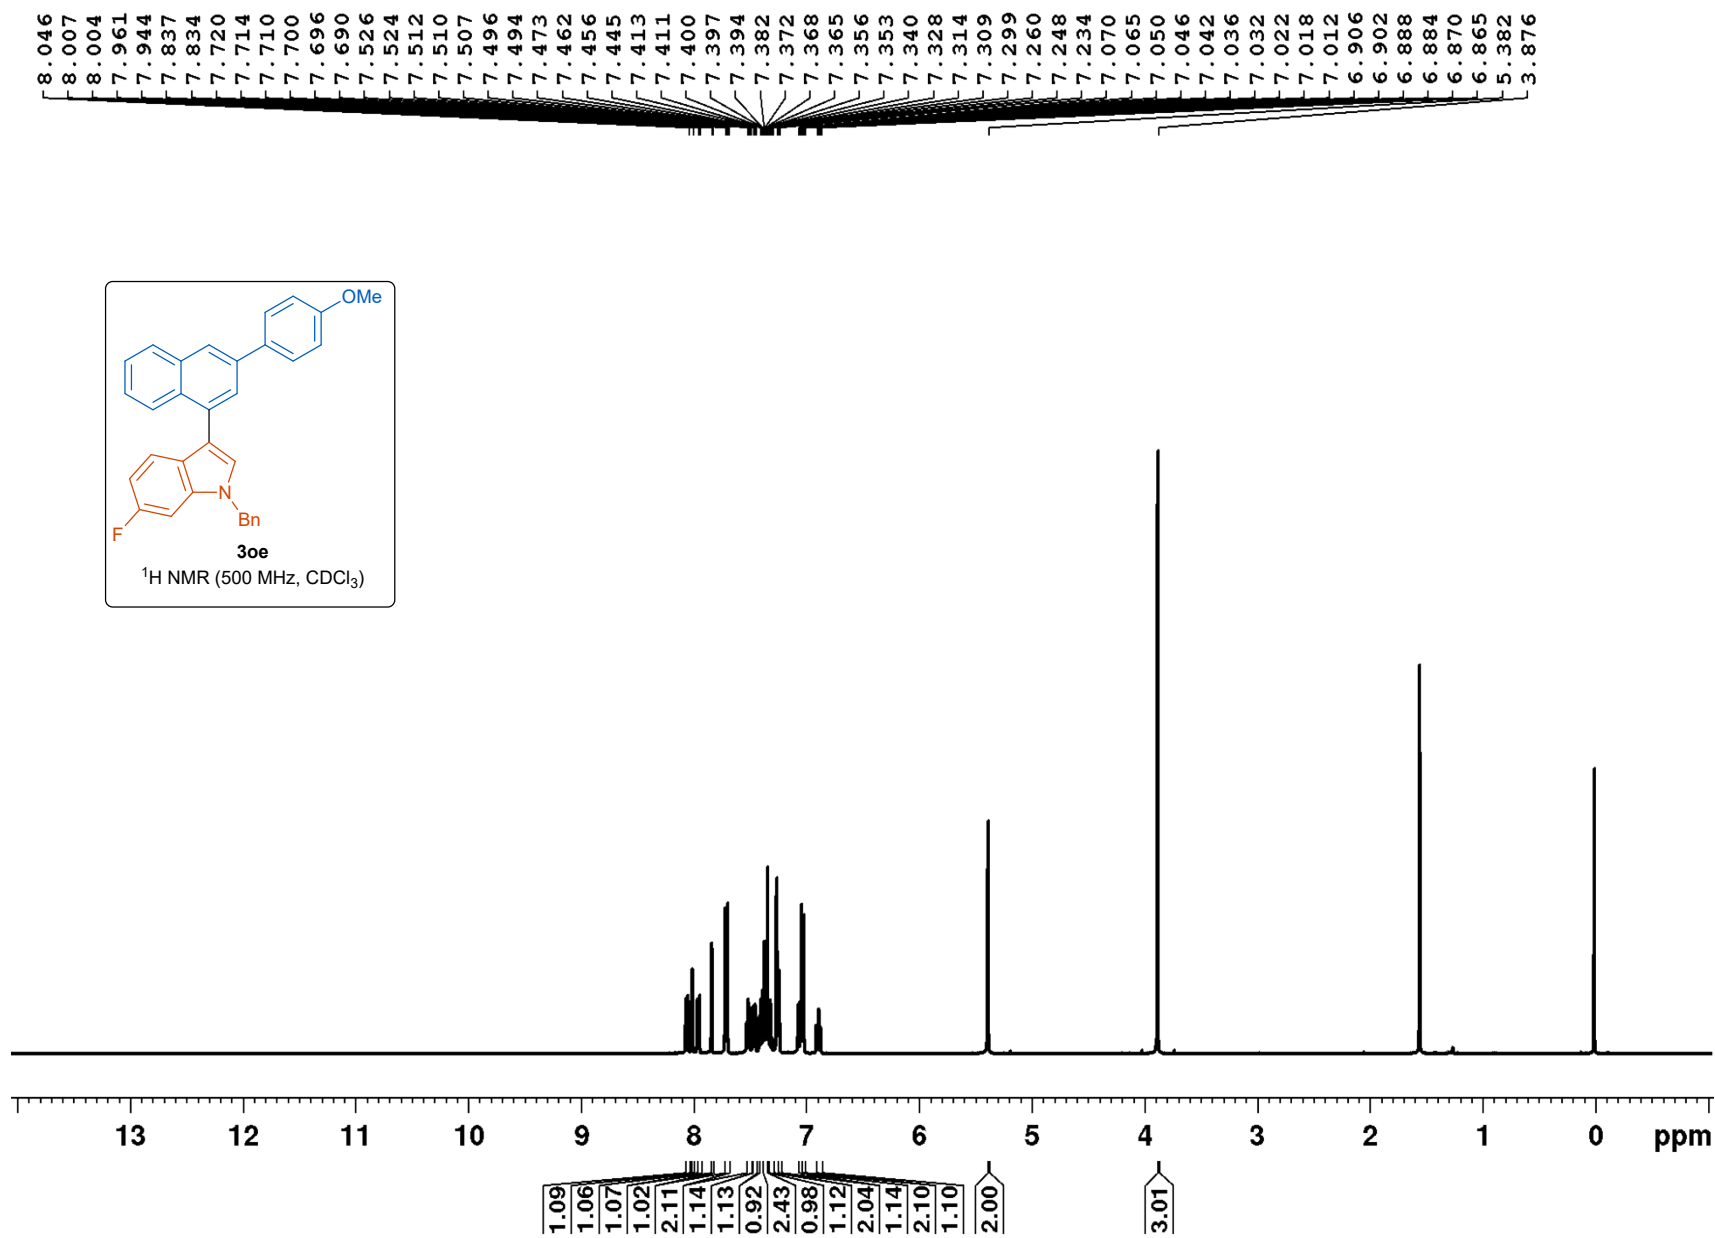



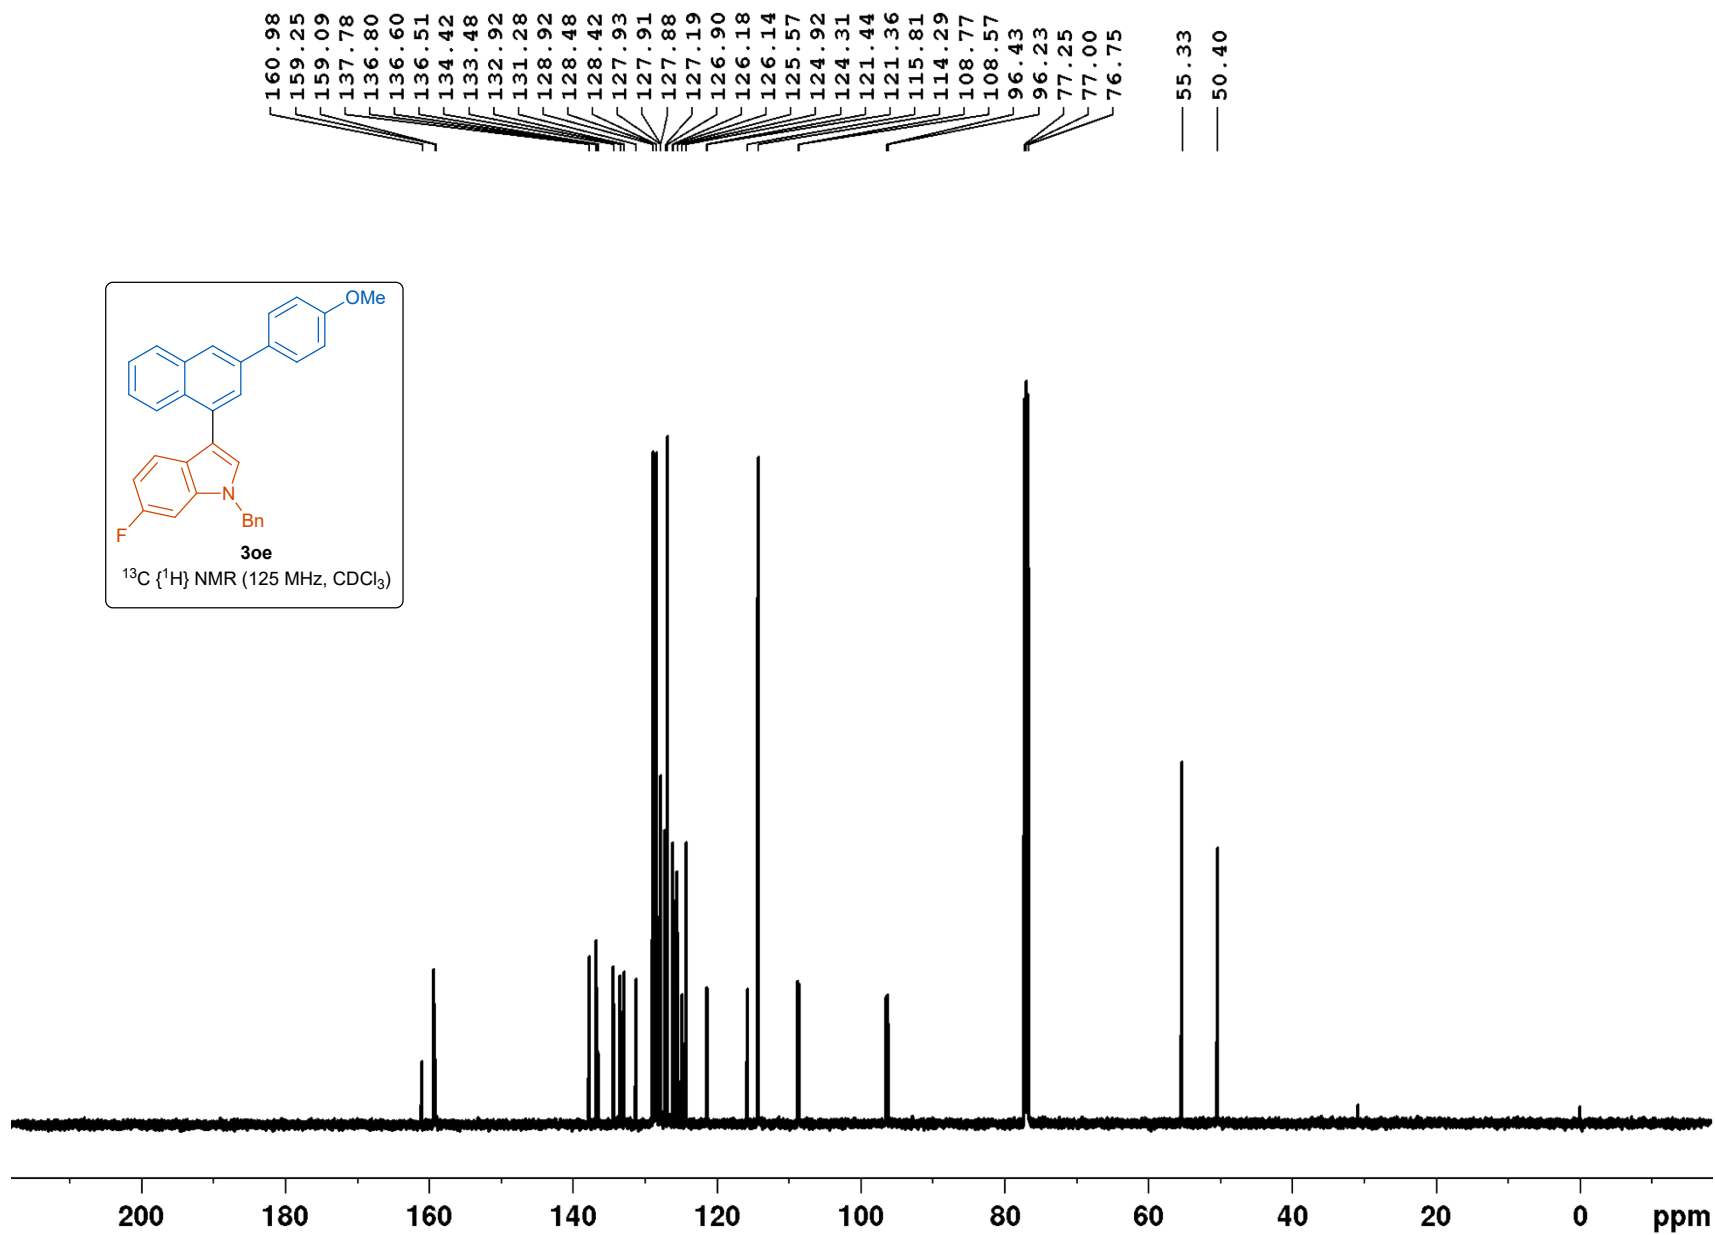

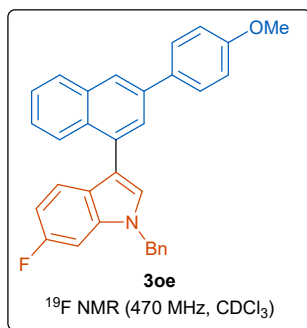

— -120.18

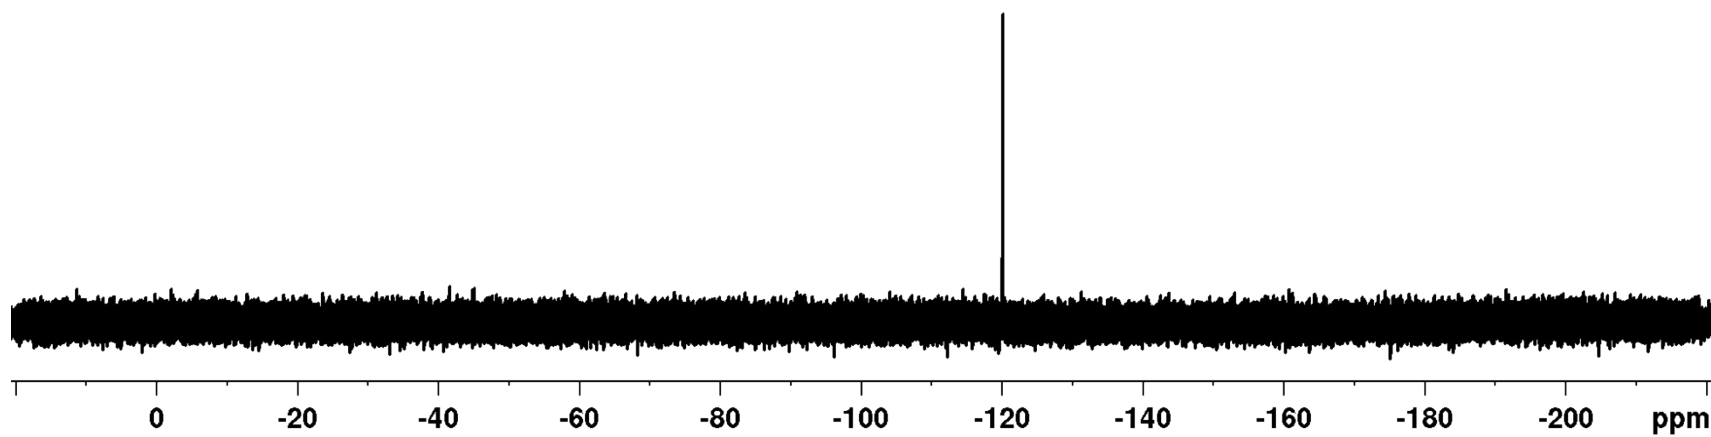

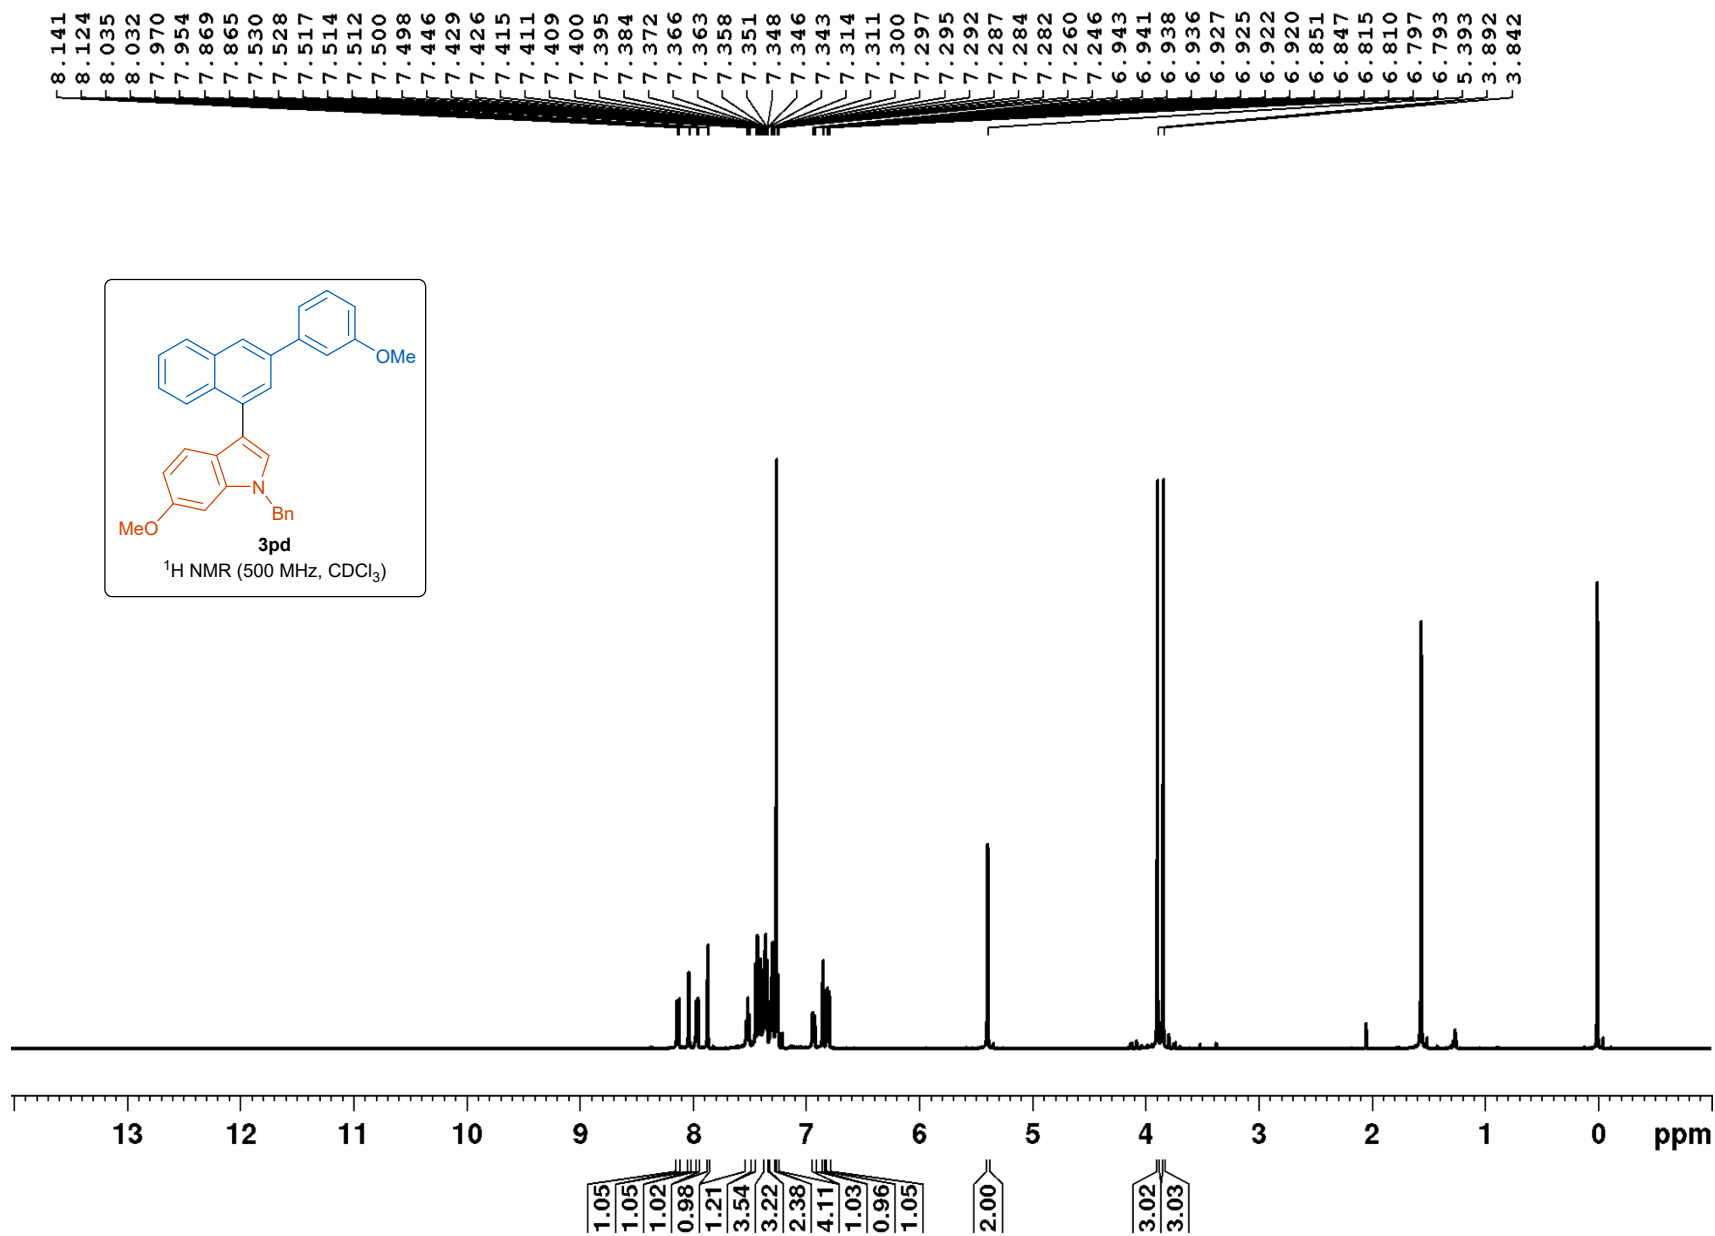

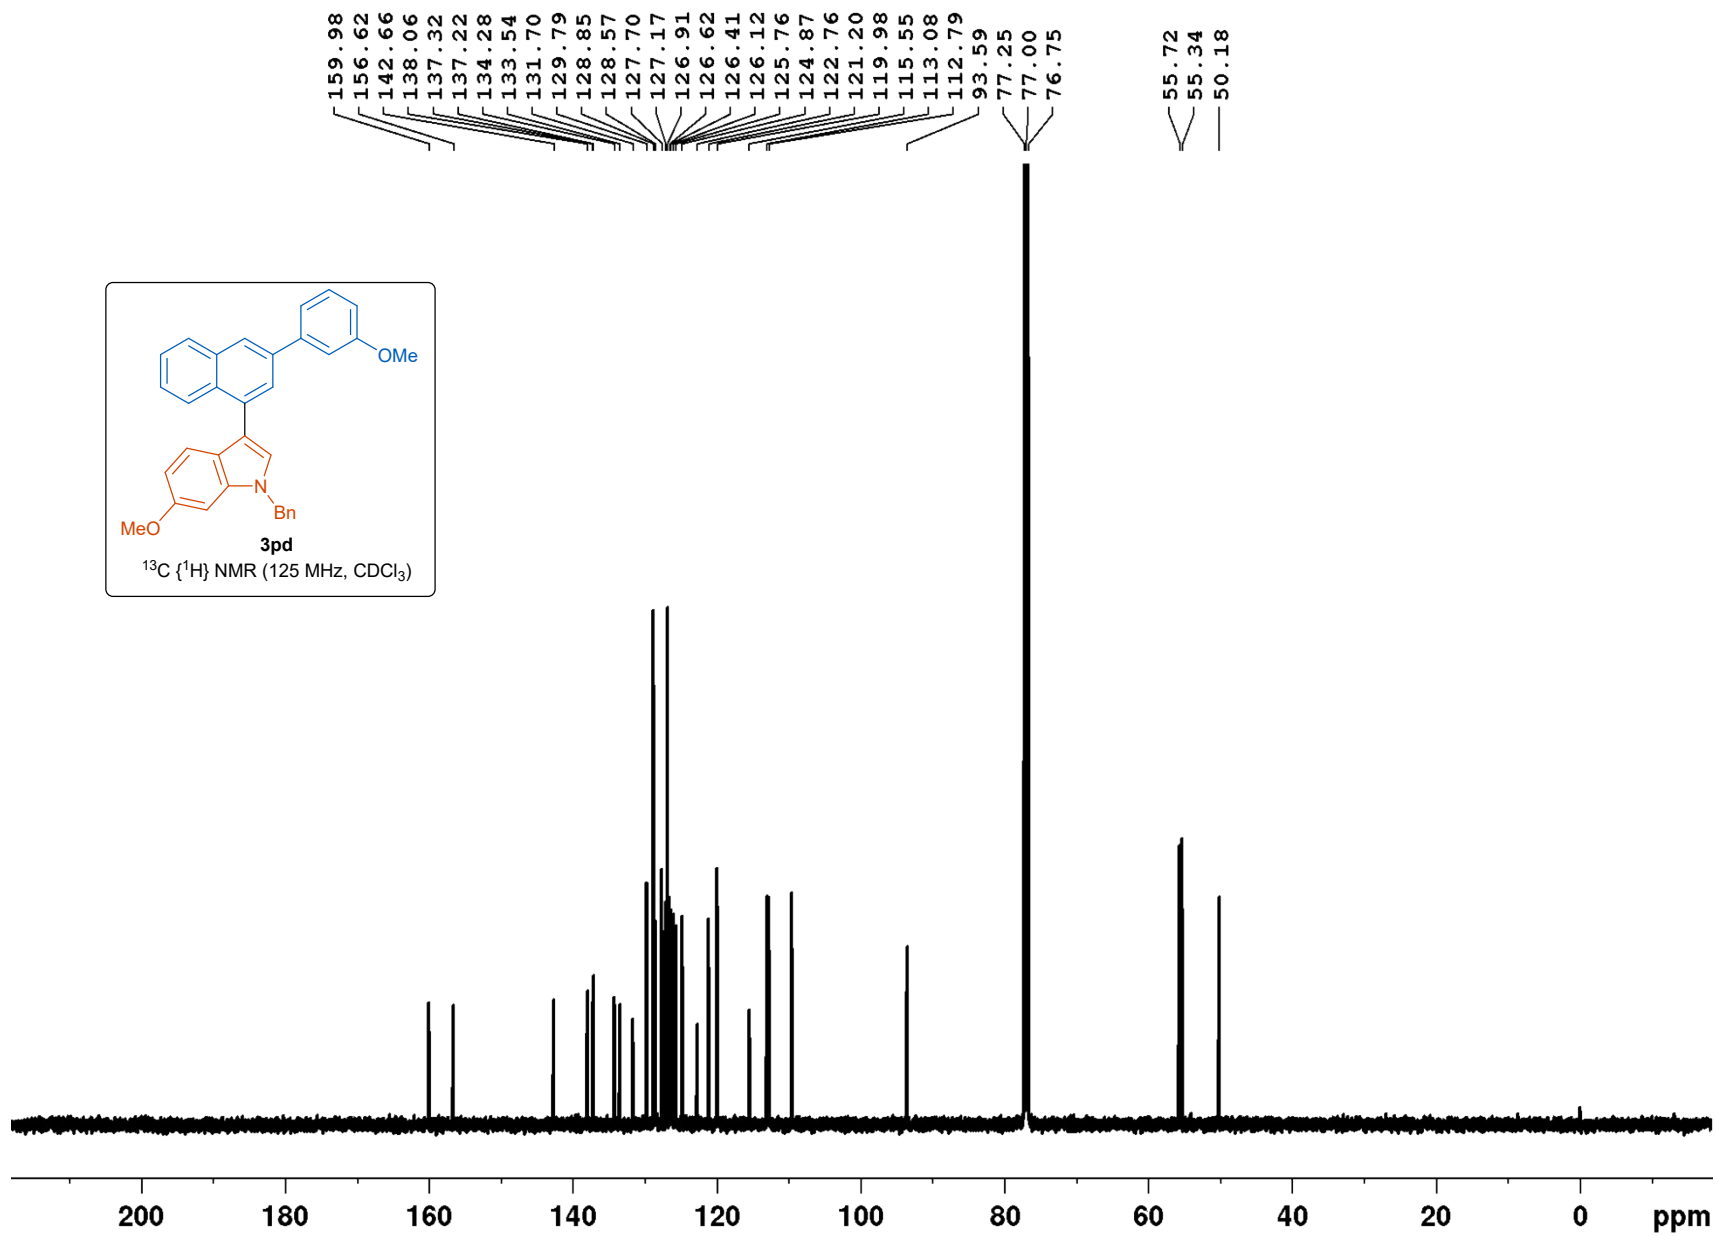

7.991  
7.974  
7.778  
7.761  
7.755  
7.751  
7.748  
7.739  
7.735  
7.730  
7.589  
7.473  
7.471  
7.459  
7.457  
7.443  
7.441  
7.376  
7.374  
7.362  
7.359  
7.357  
7.345  
7.343  
7.334  
7.331  
7.328  
7.321  
7.317  
7.315  
7.306  
7.302  
7.298  
7.283  
7.267  
7.254  
7.247  
7.237  
7.211  
7.208  
7.196  
7.191  
7.130  
7.000  
6.984  
6.970  
6.963  
6.960  
6.947  
6.944  
6.693  
6.691  
6.679  
6.676  
5.721  
4.764  
4.752  
4.740  
4.319  
4.307  
3.888  
2.318

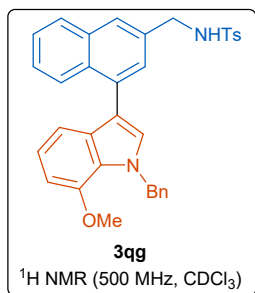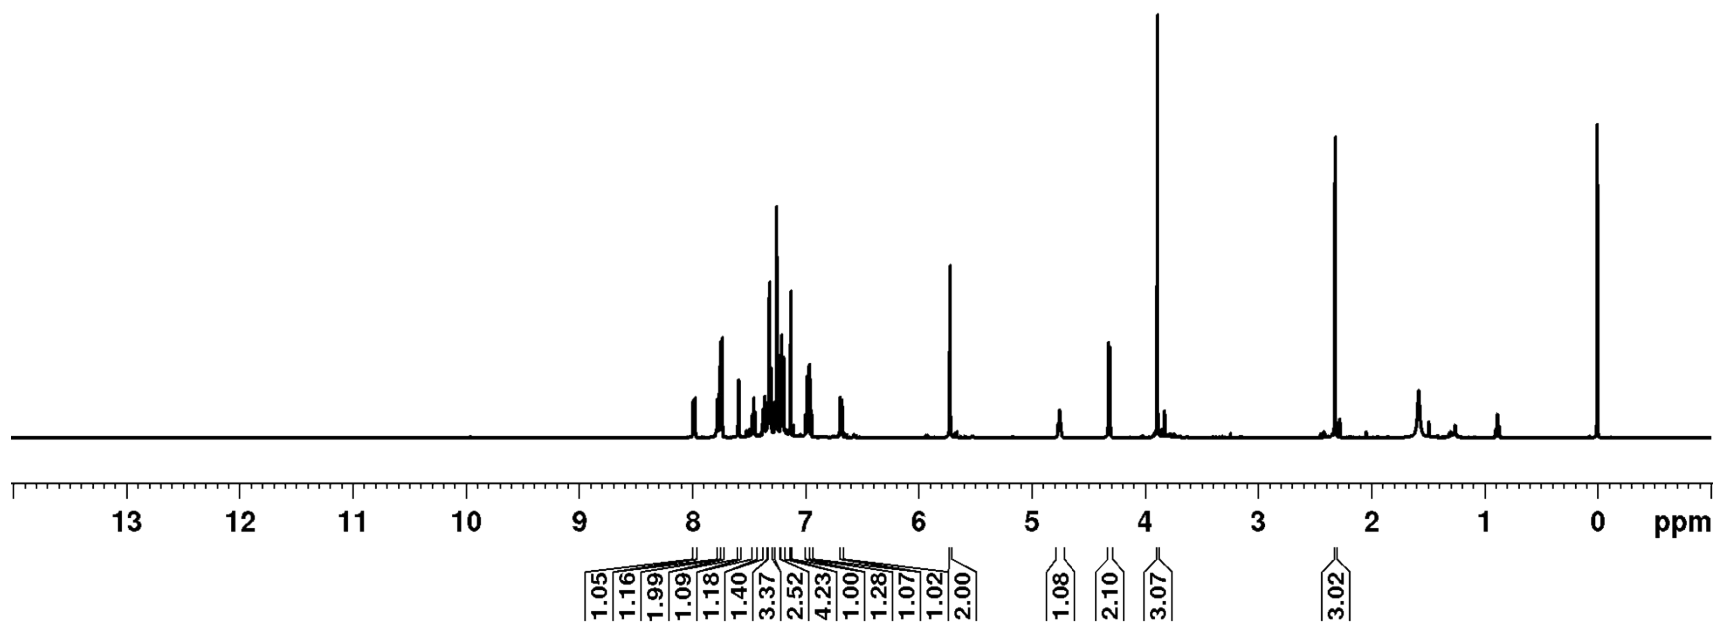

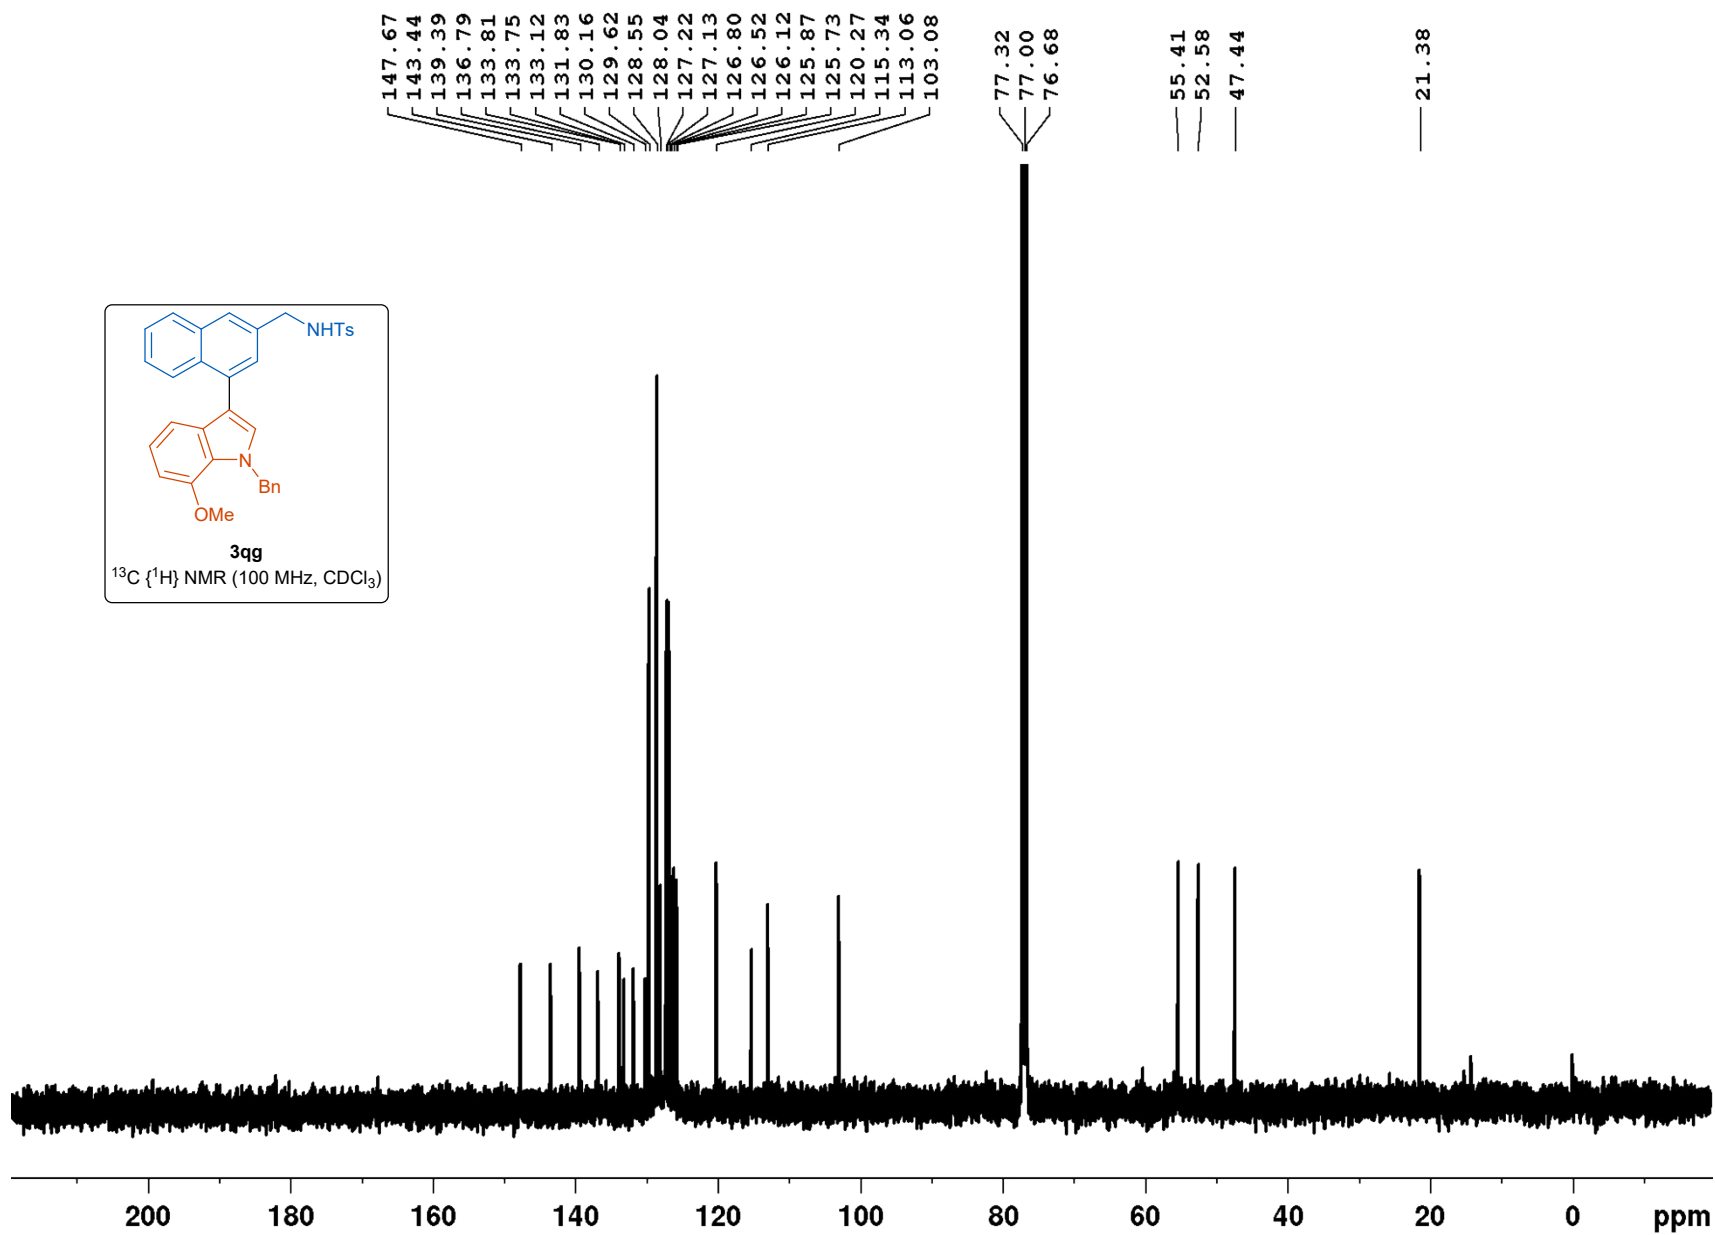

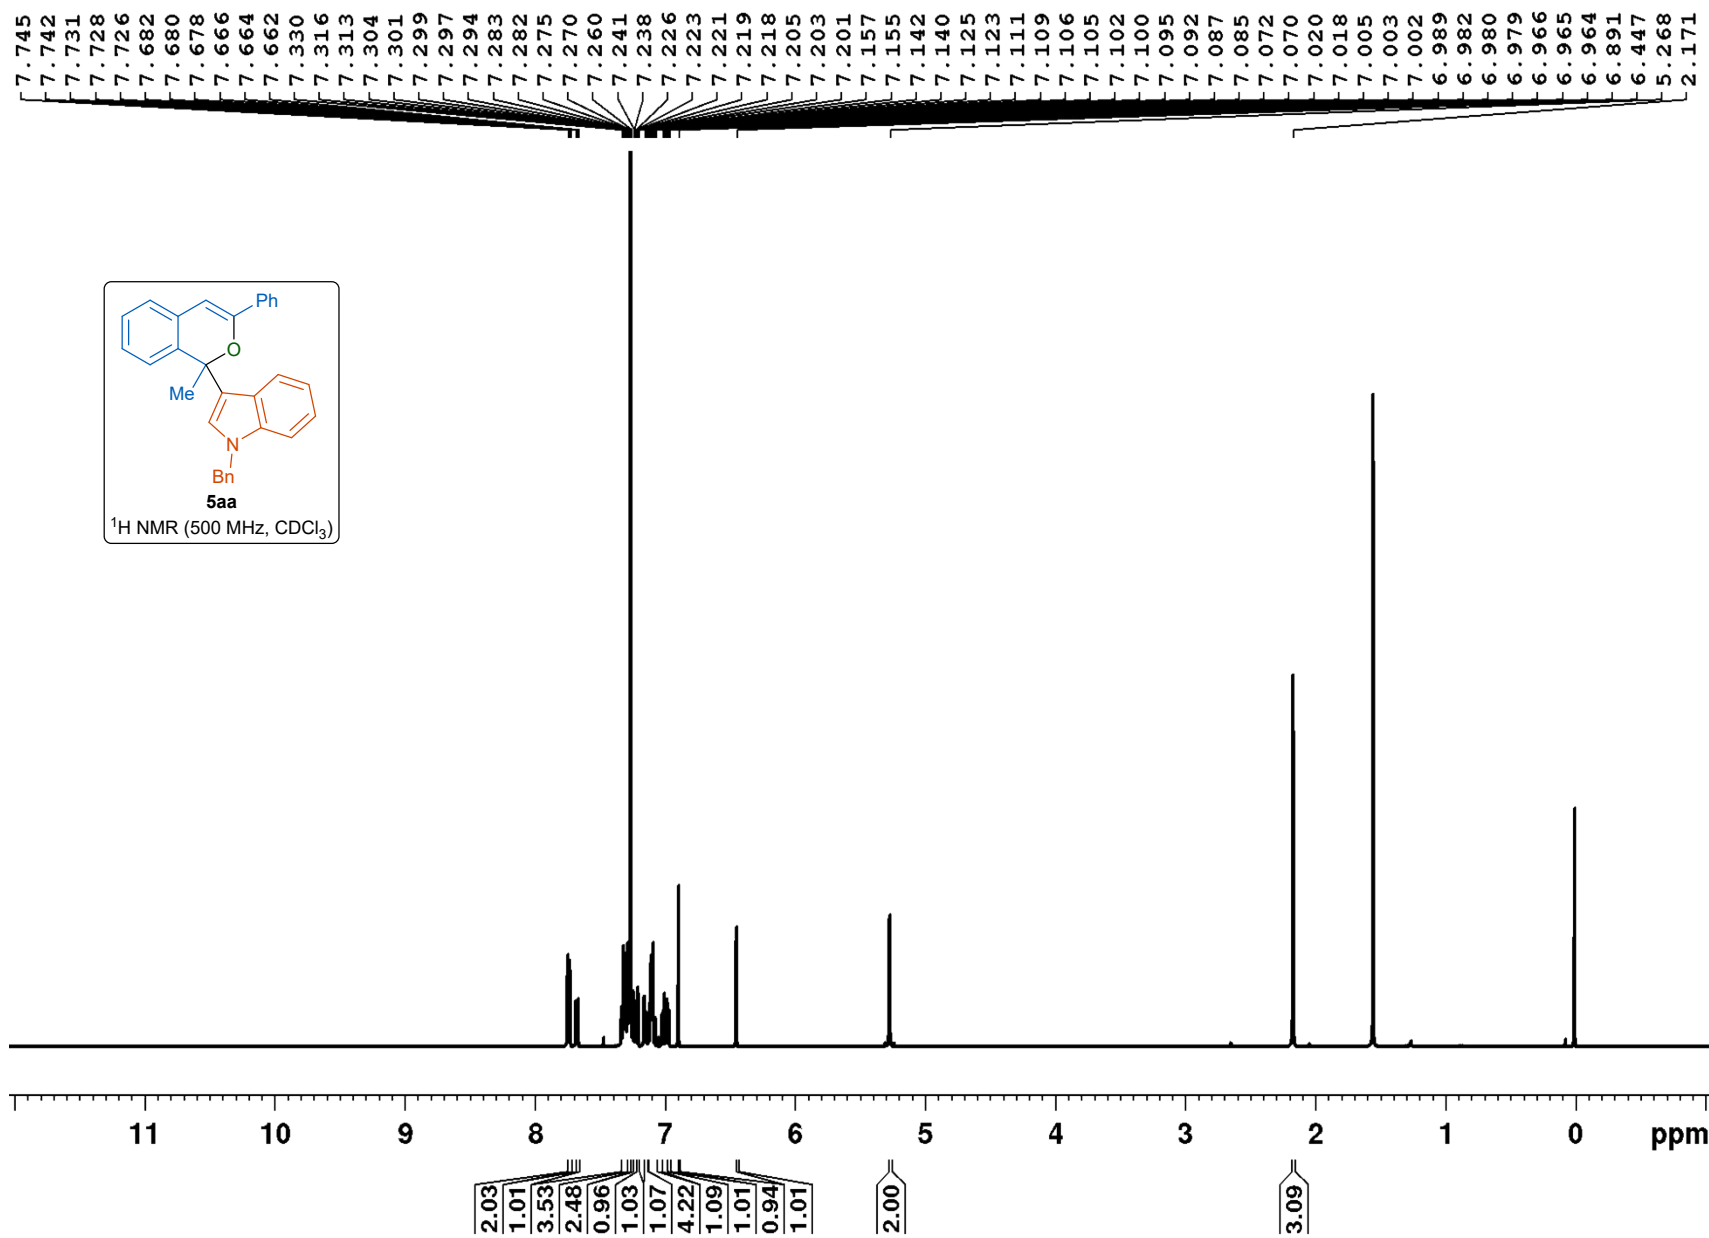

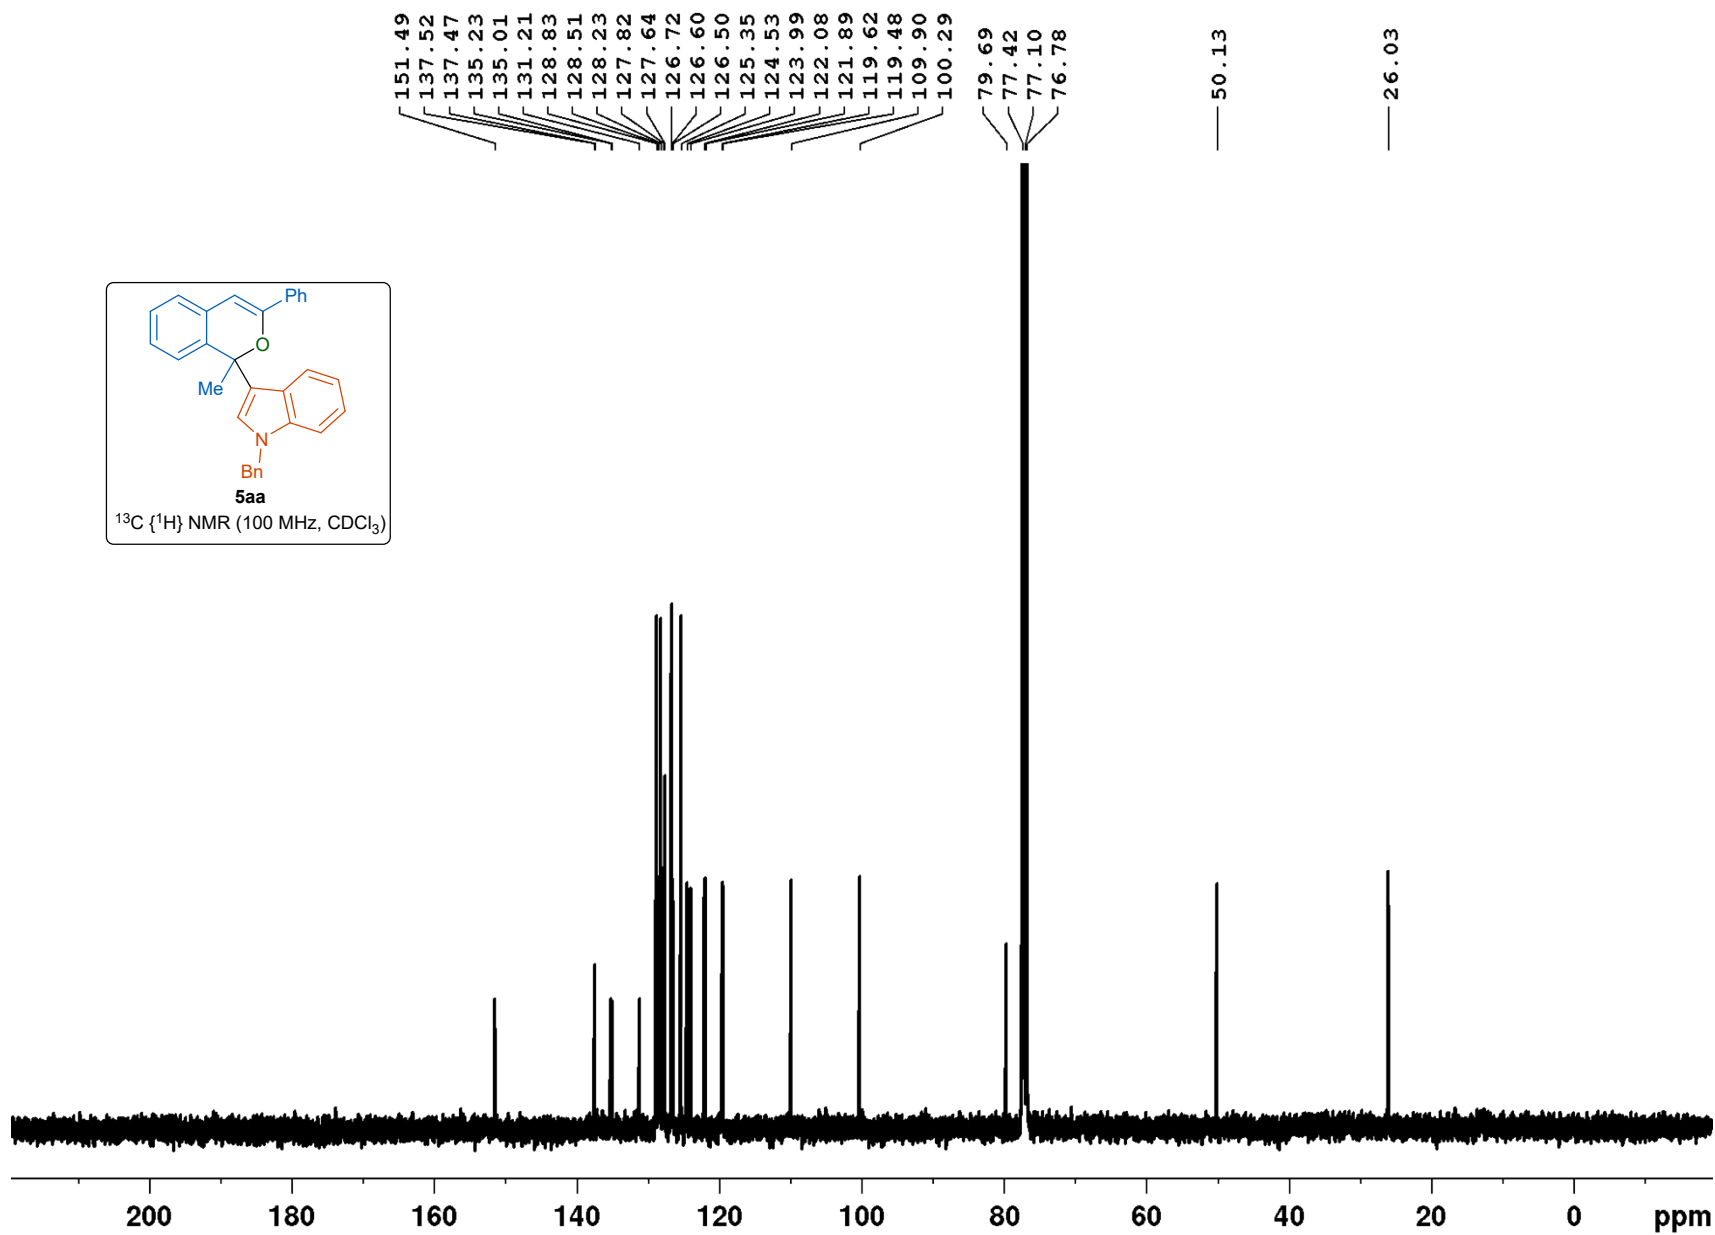



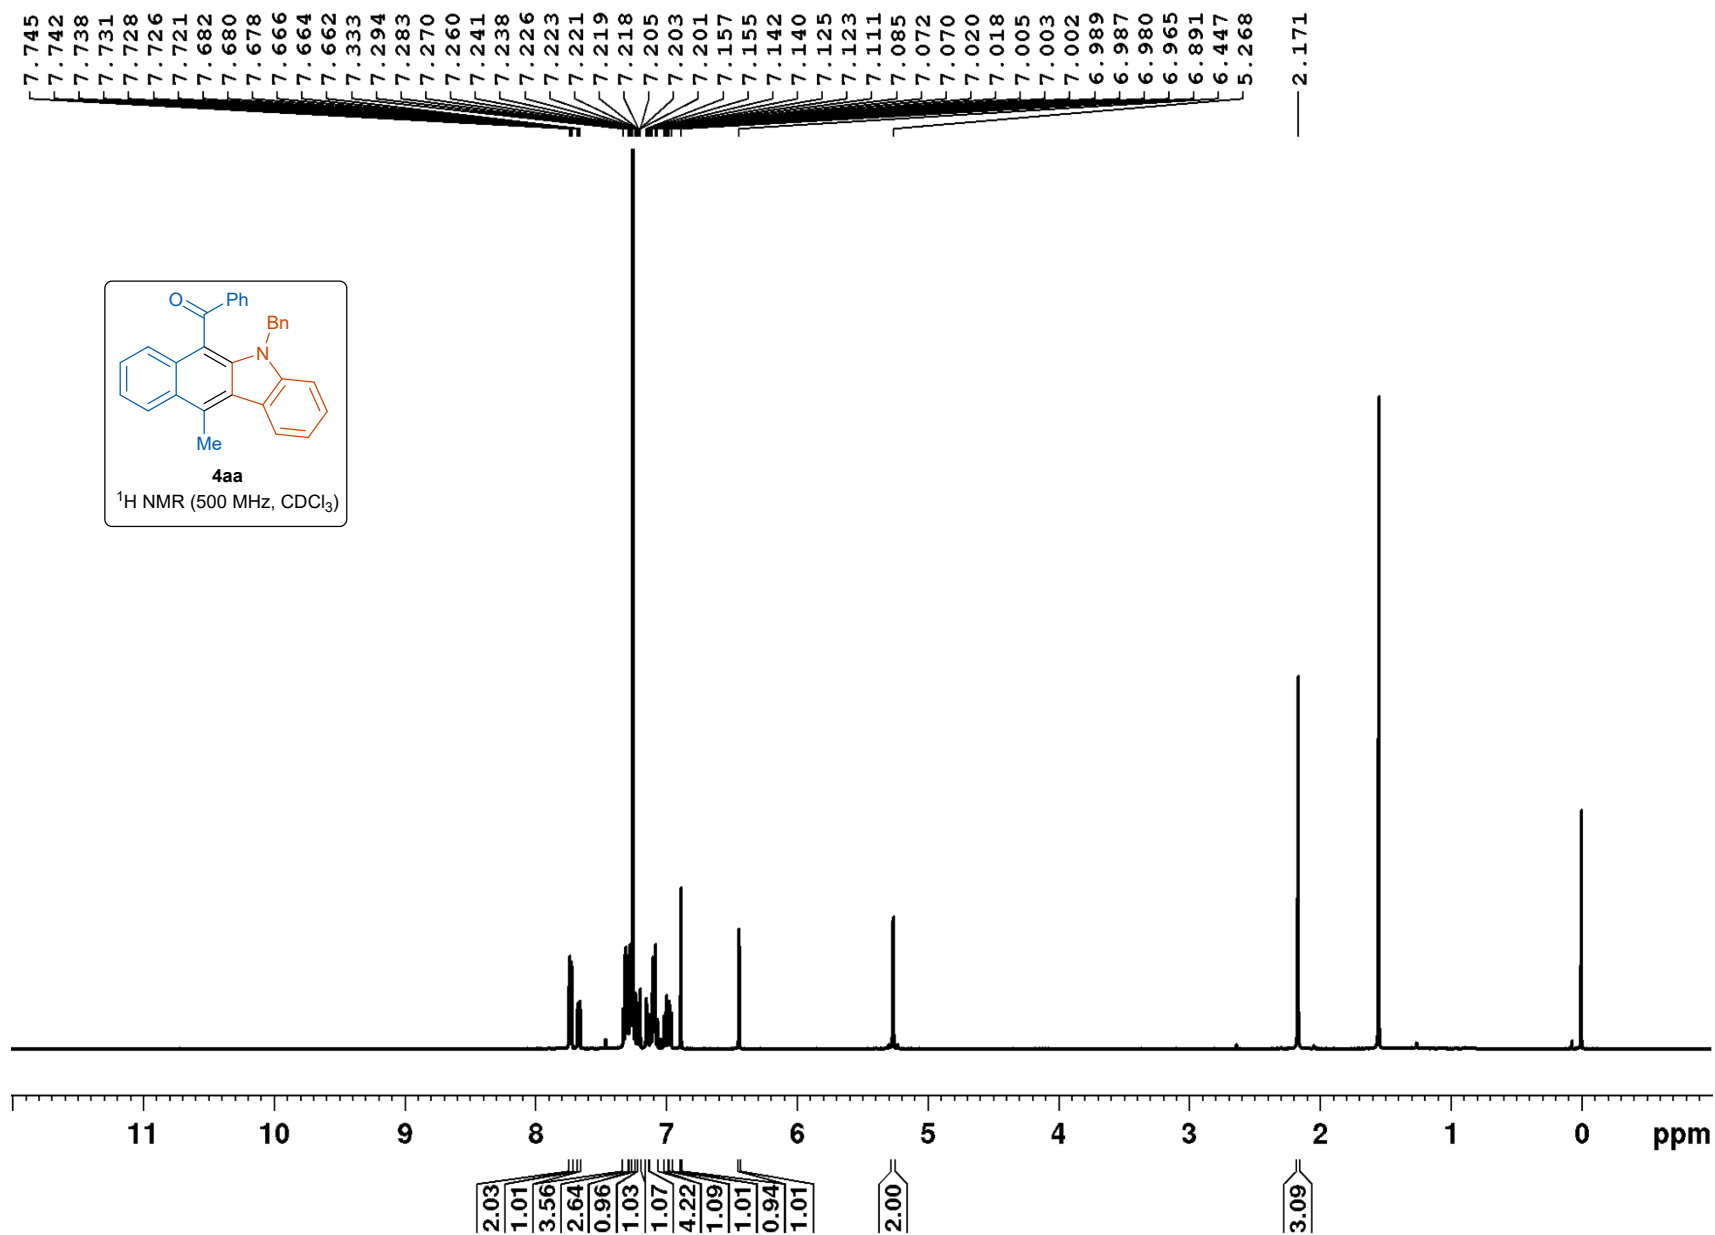

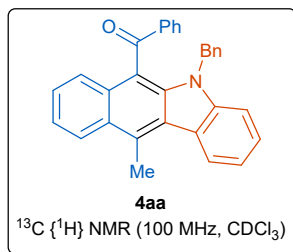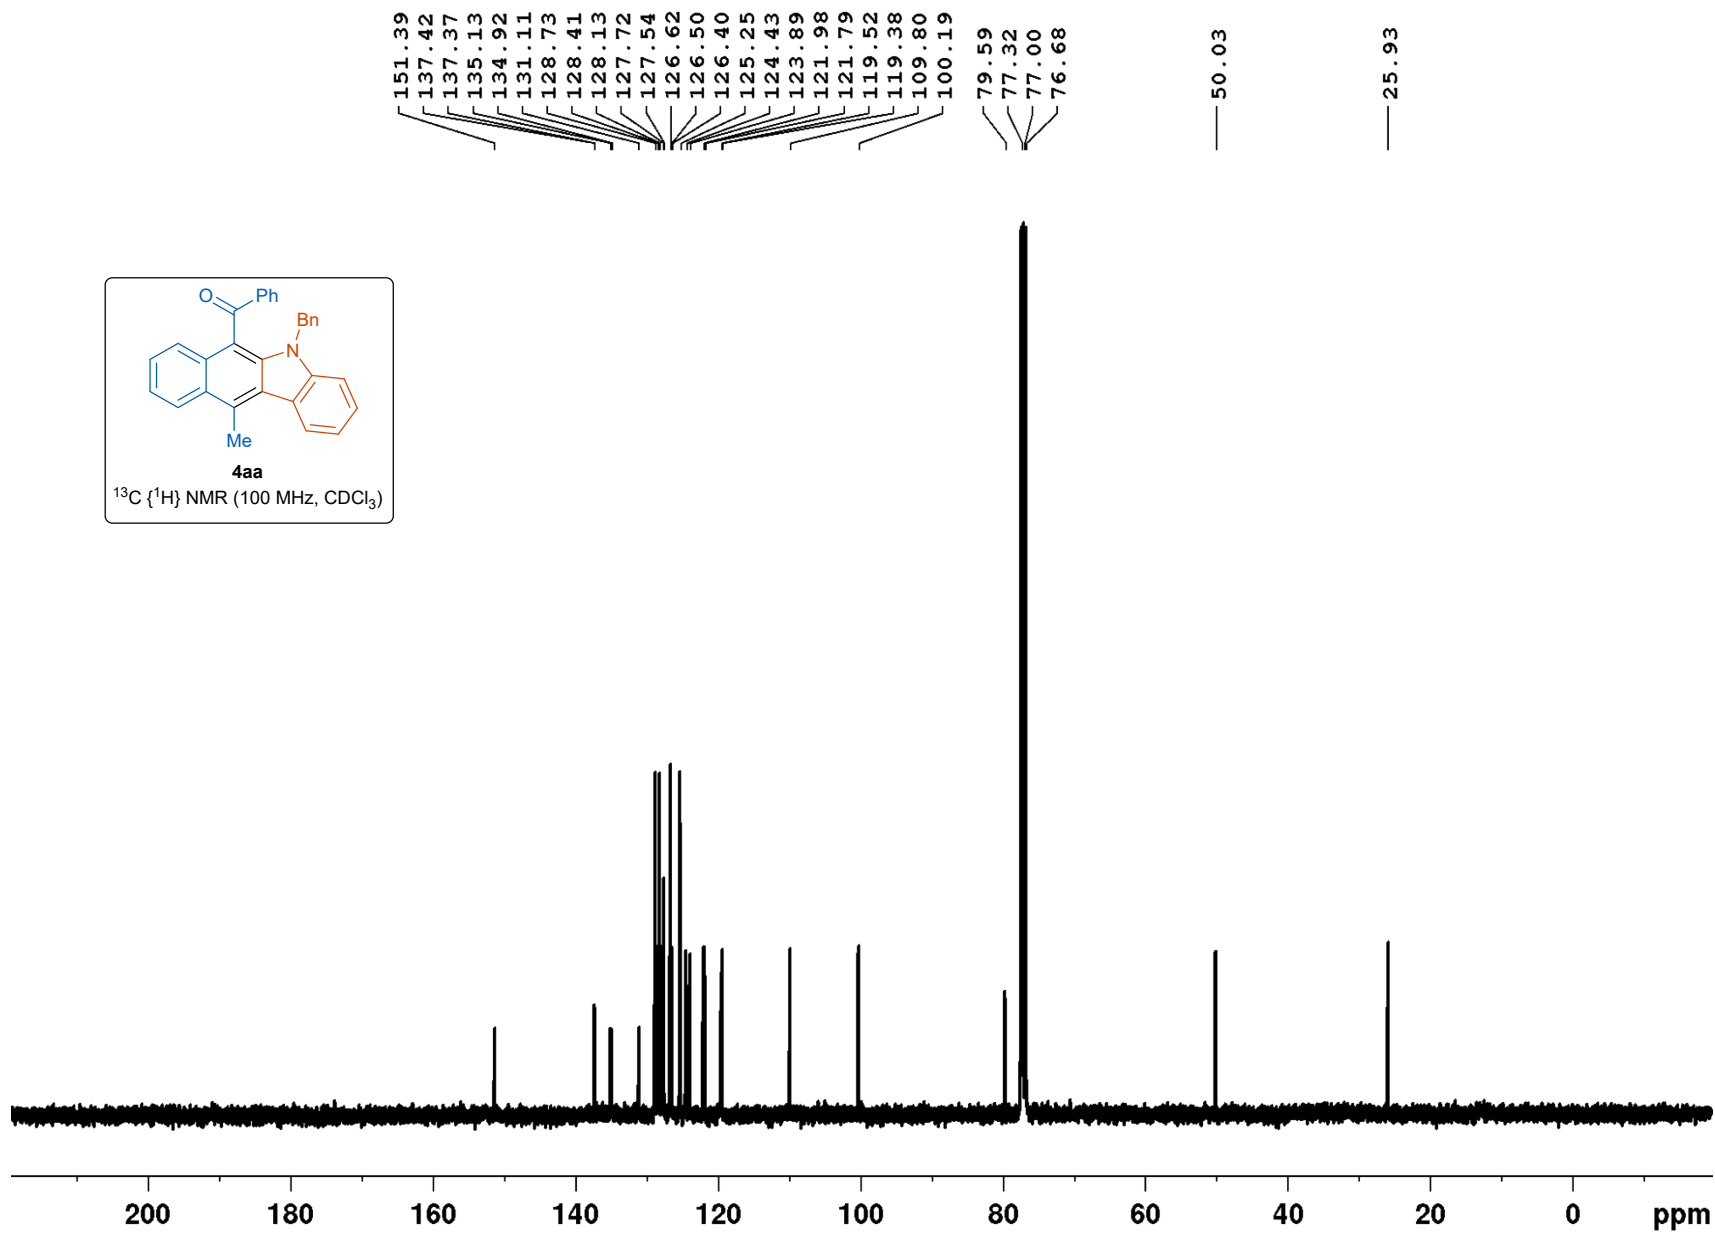

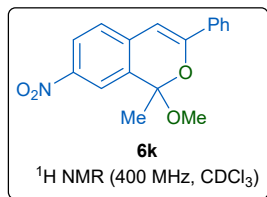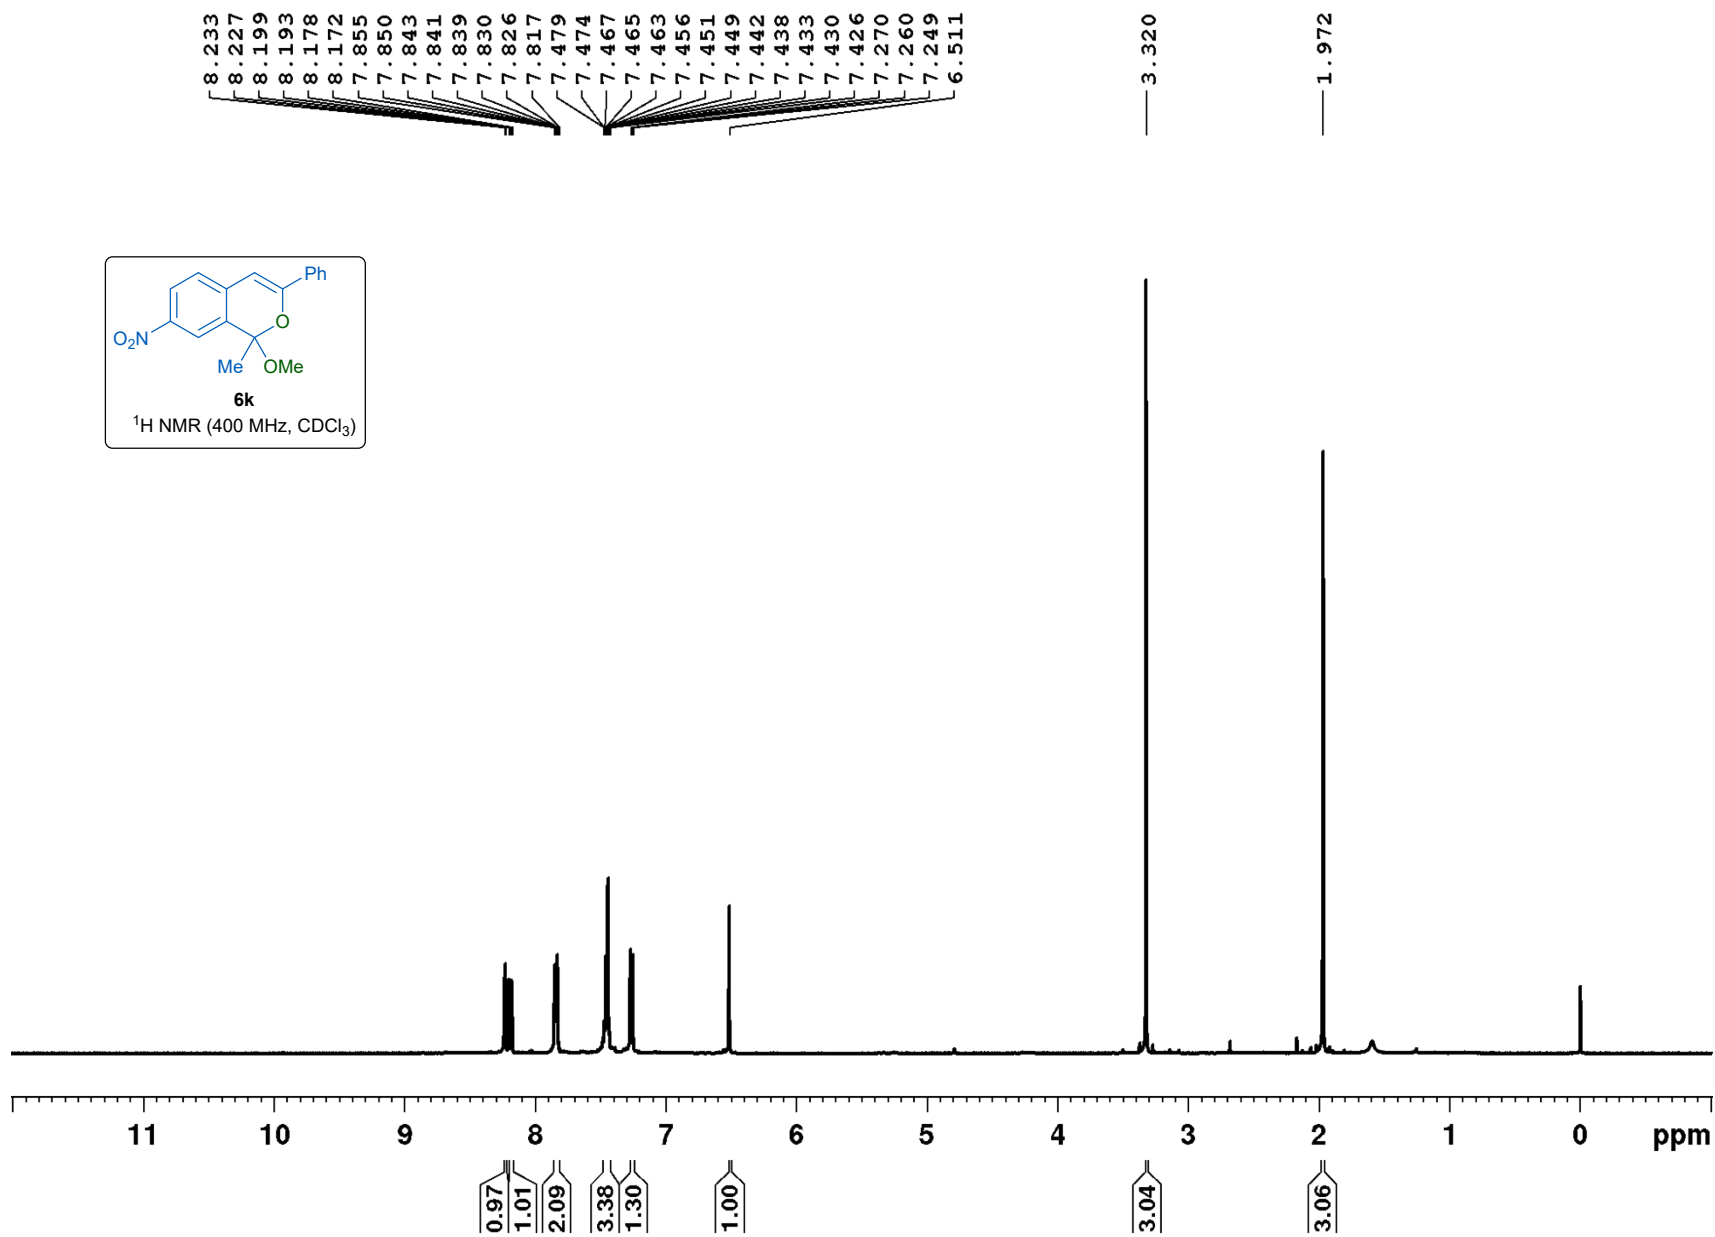

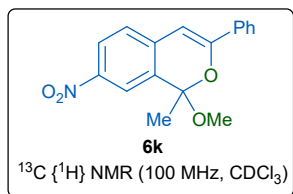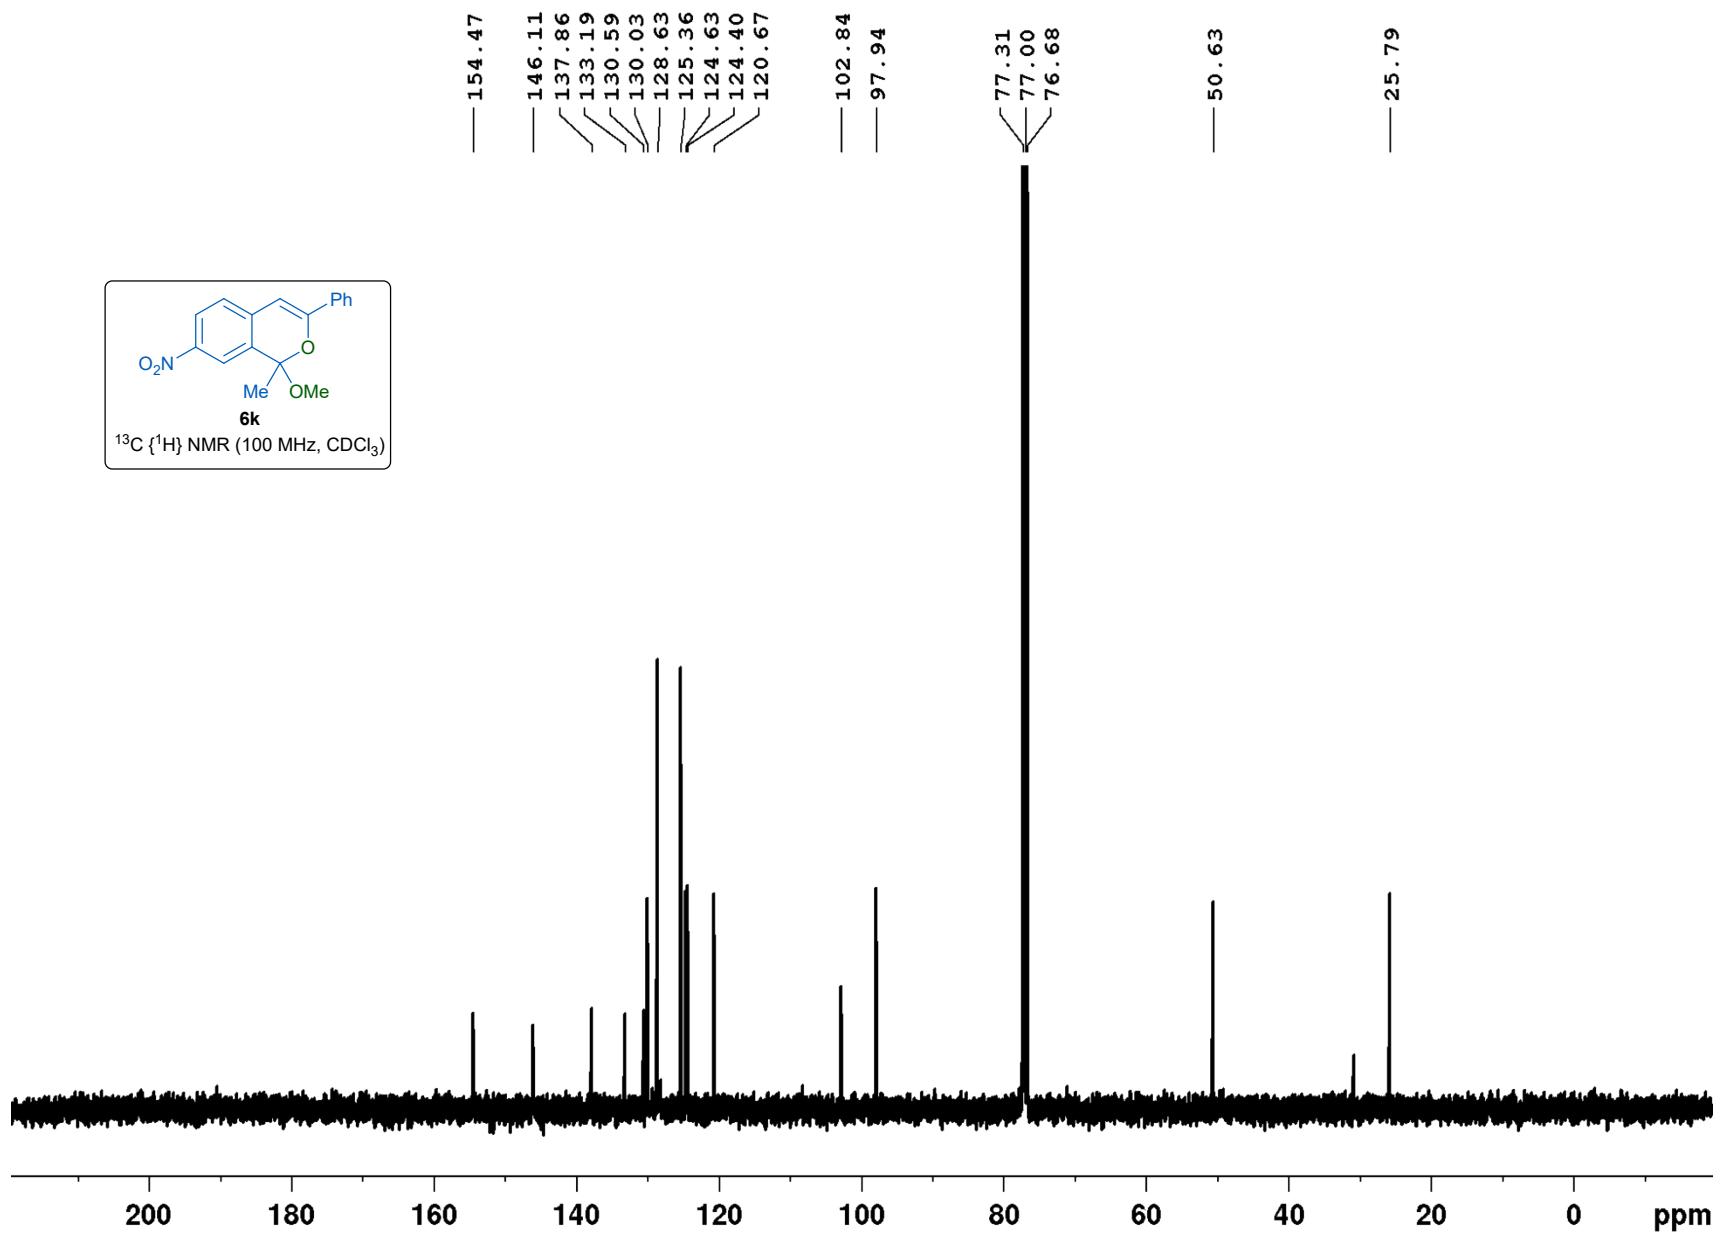

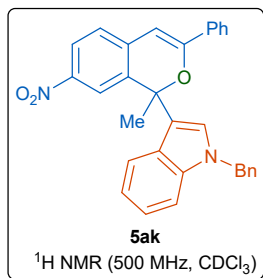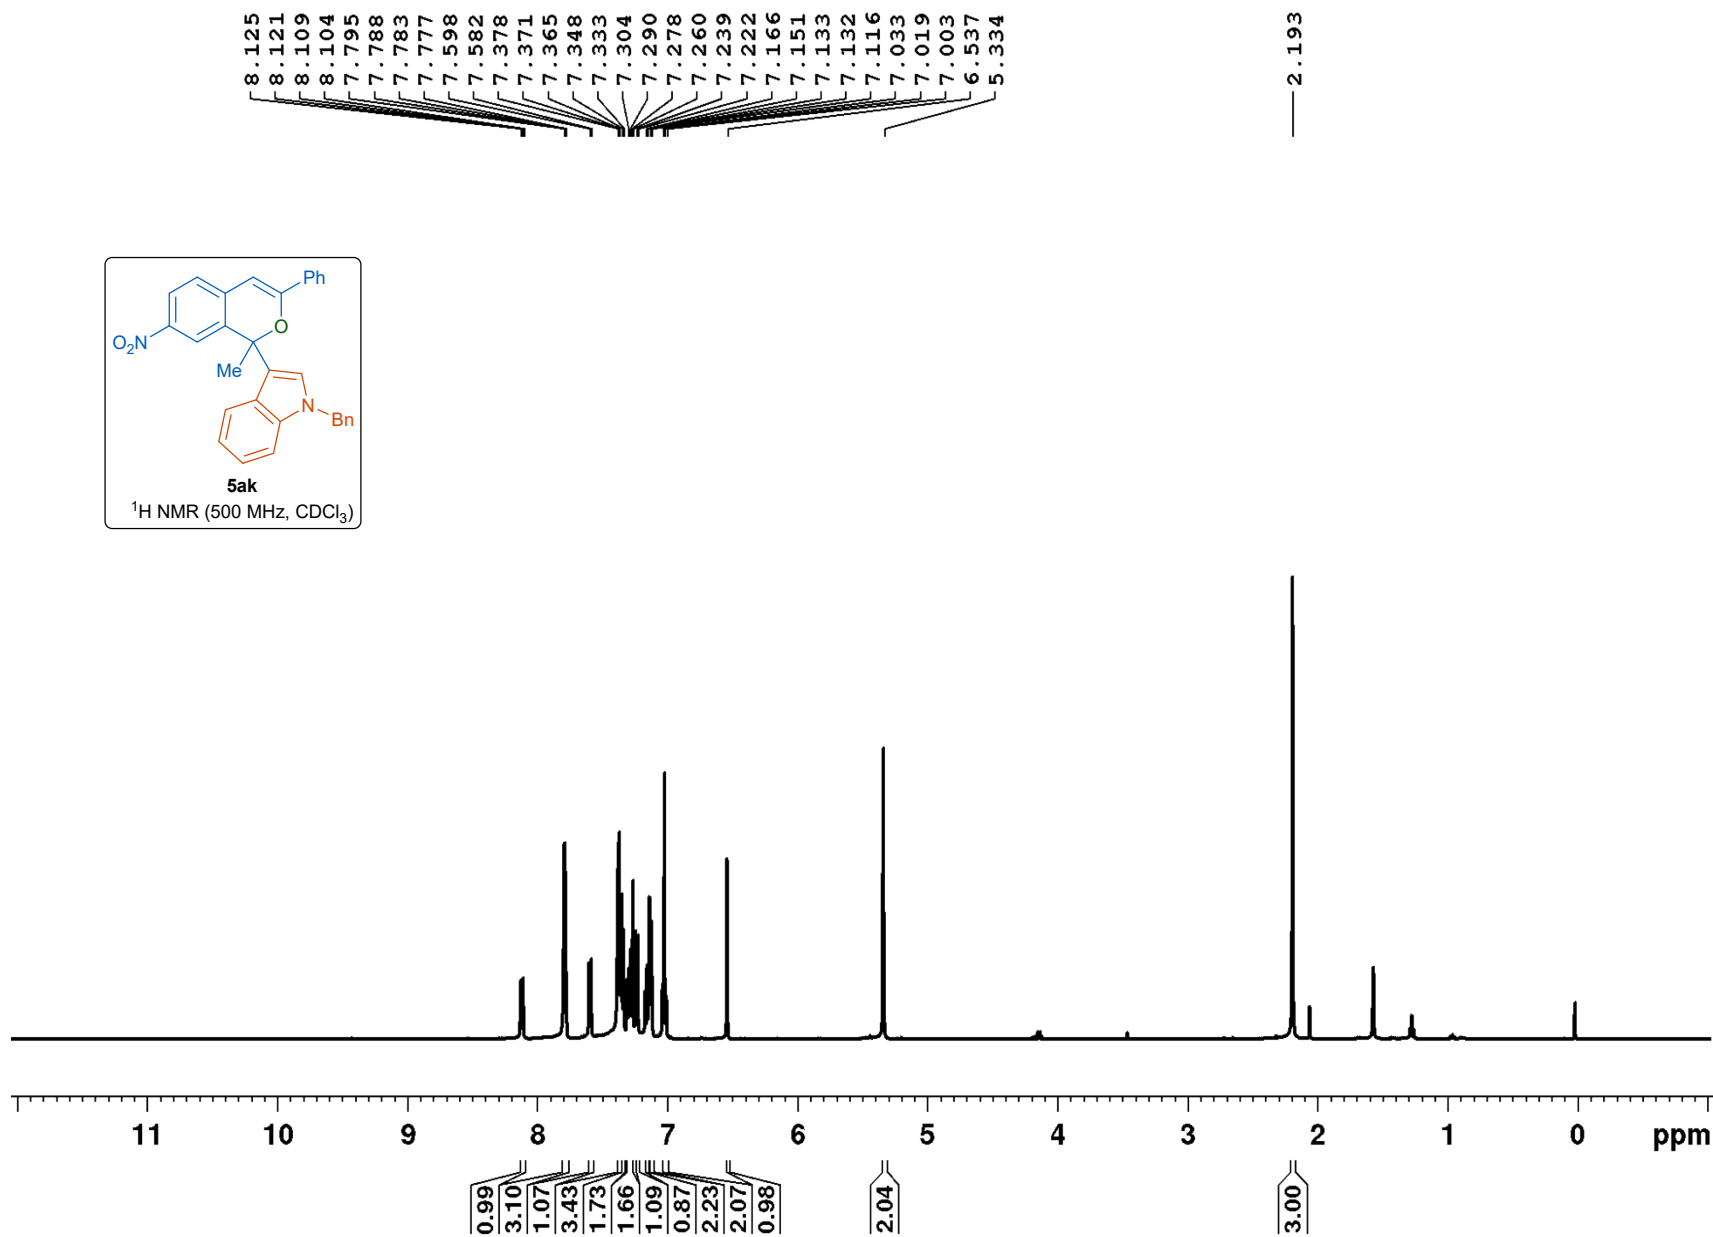

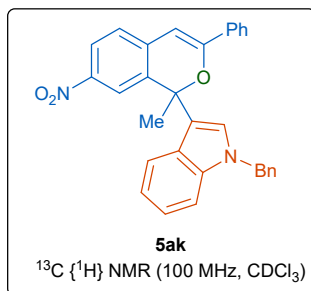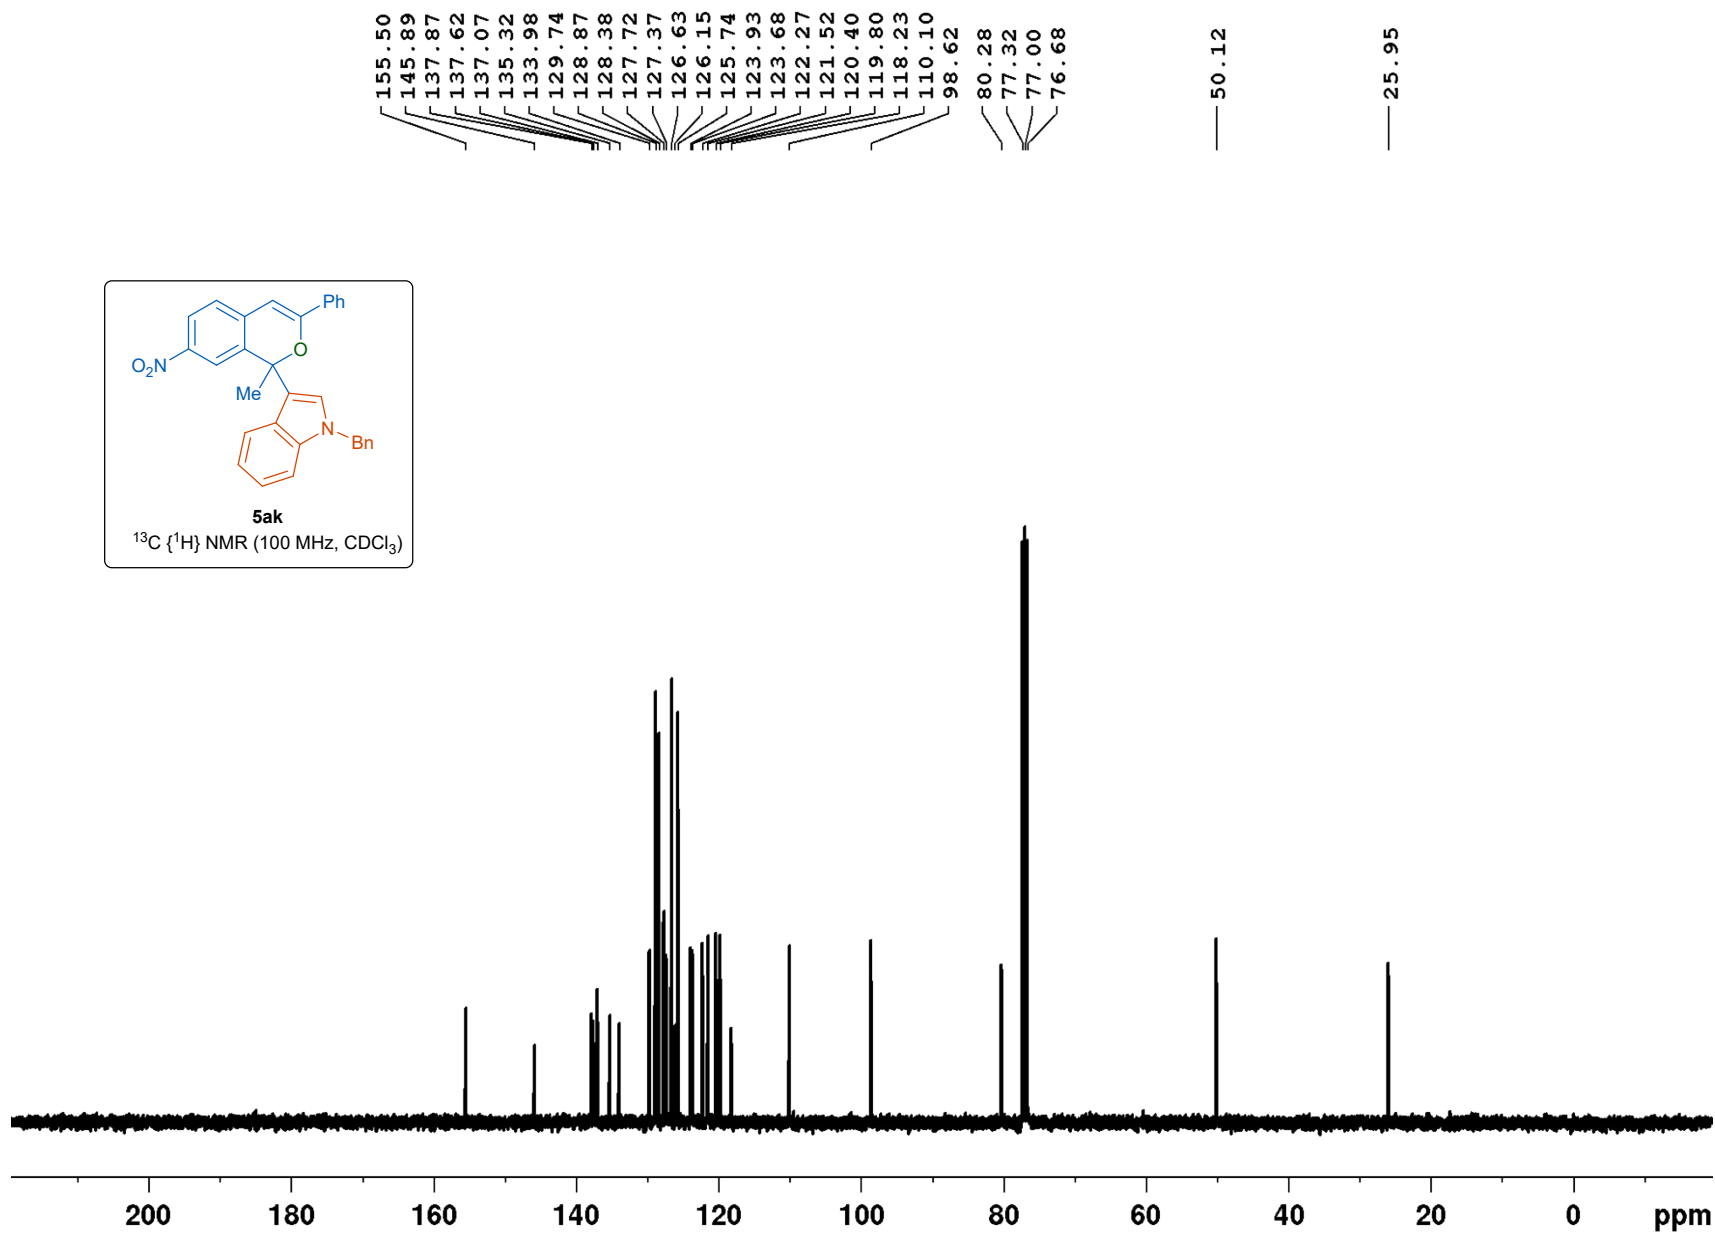

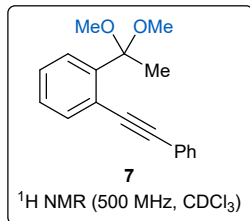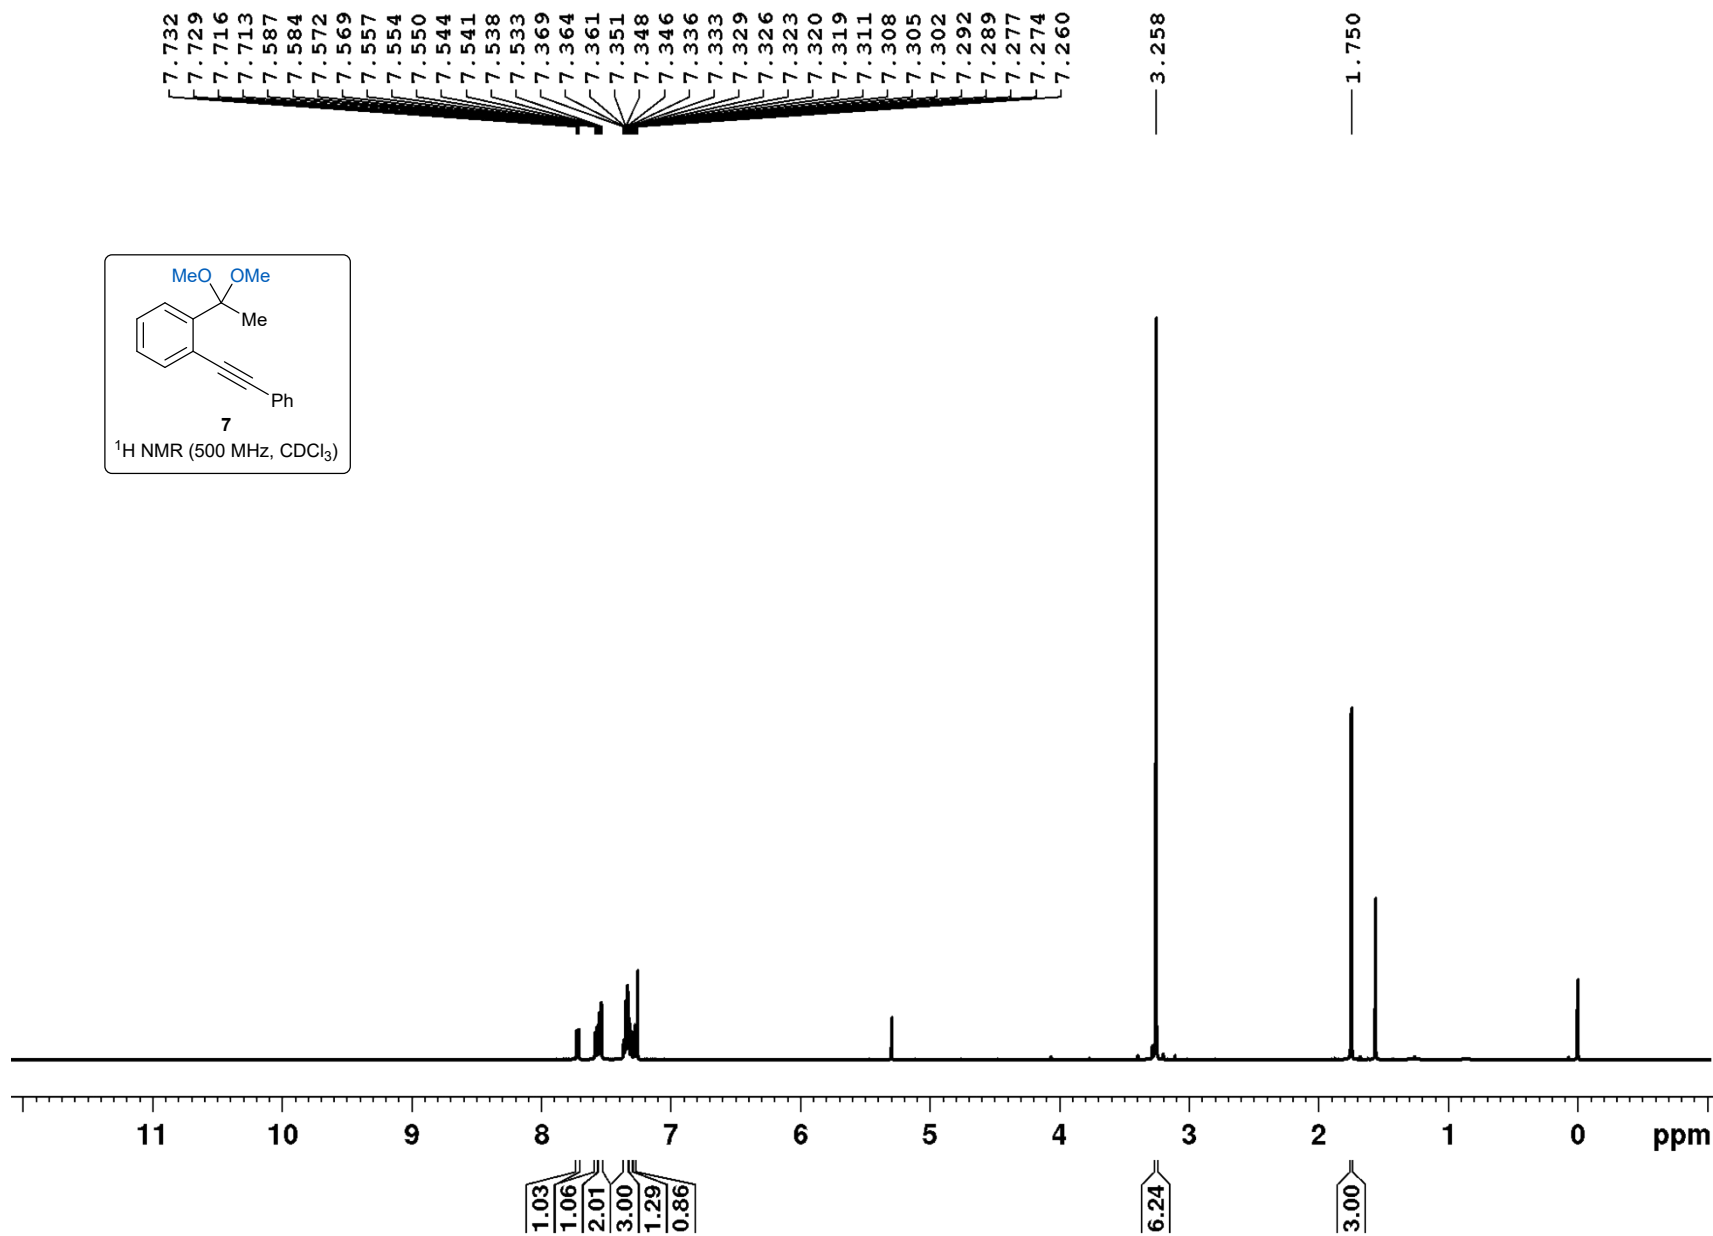

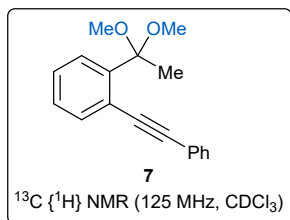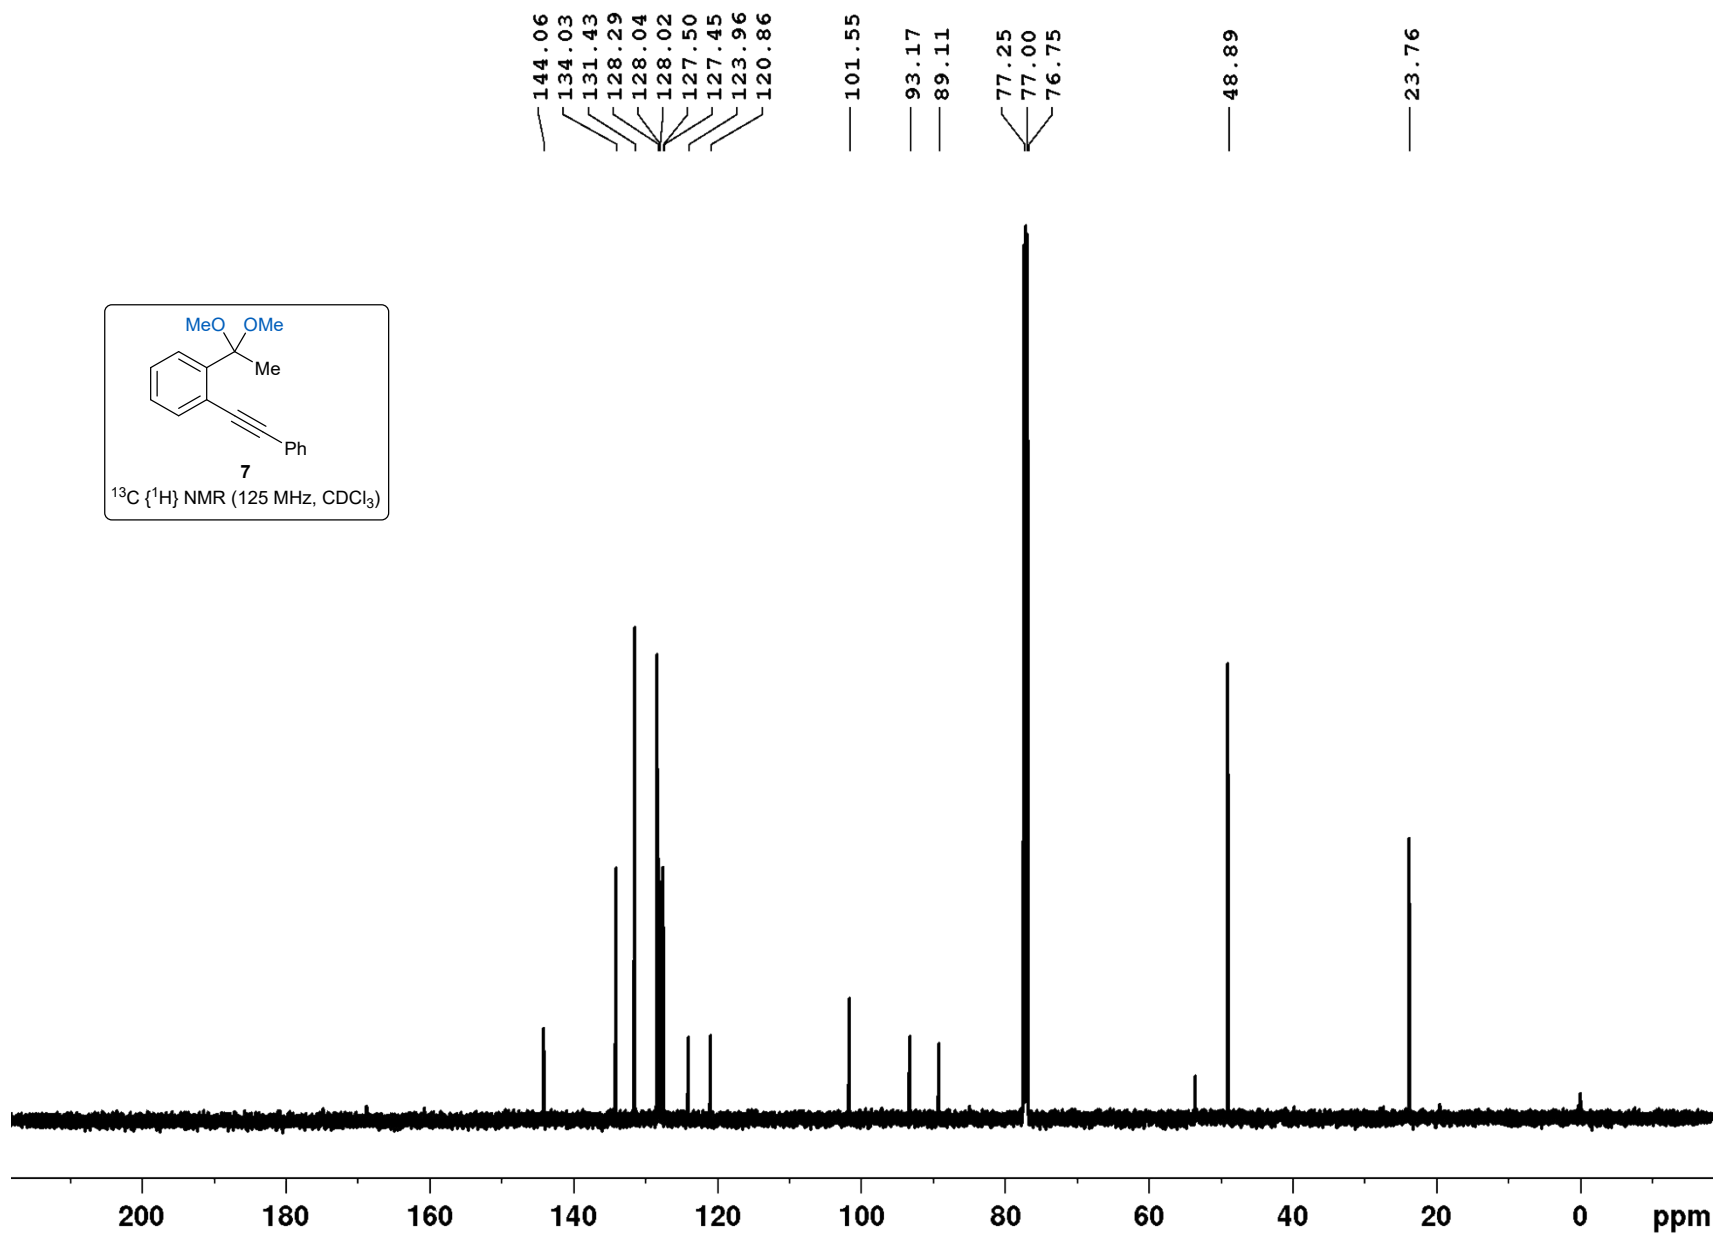



14.  $^1\text{H}$  NMR monitoring of the reaction of **1a** with **2a** in the presence of TMOF

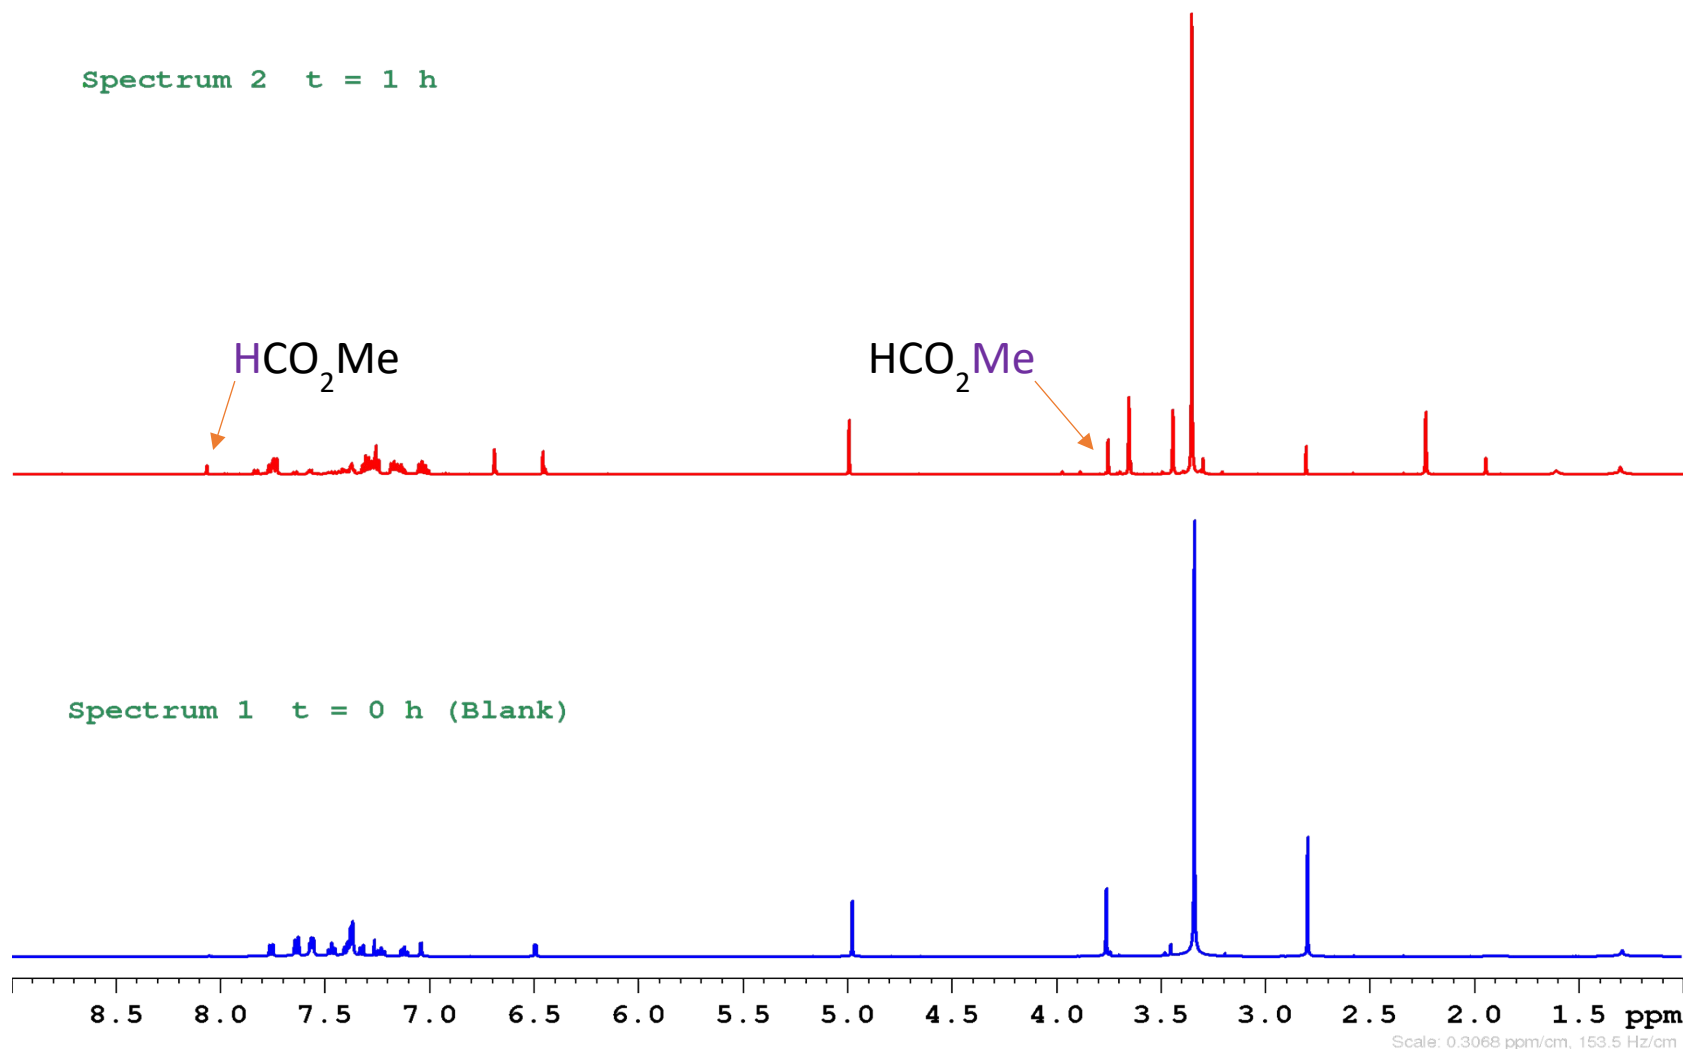

**Figure S1:**  $^1\text{H}$  NMR monitoring of the reaction of **1a** with **2a** in the presence of TMOF (Spectrum 1: Reaction mixture before adding AgOTf, Spectrum 2: Reaction mixture after 1h of adding AgOTf).

## 15. X-ray data of 3af and 5ak

### X-ray data of 3af

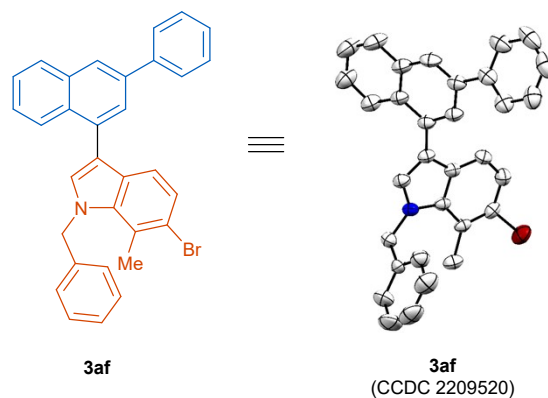

**Figure 2:** ORTEP representation of **3af**. Thermal ellipsoids are drawn with 50% probability.

**Table S2. Crystallographic data of compound 3af**

|                     |                                     |
|---------------------|-------------------------------------|
| Compound            | <b>3af</b>                          |
| Identification code | RB61                                |
| CCDC                | <b>2209520</b>                      |
| Empirical formula   | C <sub>32</sub> H <sub>24</sub> BrN |
| Formula weight      | 502.46                              |
| Temperature/K       | 300                                 |
| Crystal system      | Triclinic                           |

|                                                     |                    |
|-----------------------------------------------------|--------------------|
| Space group                                         | P -1               |
| a/Å                                                 | 9.1848 (2)         |
| b/ Å                                                | 9.7094 (2)         |
| c/ Å                                                | 14.2815 (2)        |
| $\alpha$ / <sup>0</sup>                             | 95.361 (2)         |
| $\beta$ / <sup>0</sup>                              | 92.618 (1)         |
| $\gamma$ / <sup>0</sup>                             | 109.065 (2)        |
| Volume/Å <sup>3</sup>                               | 1194.55 (4)        |
| Z                                                   | 2                  |
| Density( $\rho$ )calc g/cm <sup>3</sup>             | 1.397              |
| Absorption Coefficient( $\mu$ ) (mm <sup>-1</sup> ) | 1.742              |
| F(000)                                              | 515.6              |
| Crystal size/mm <sup>3</sup>                        | 0.02 x 0.02 x 0.01 |
| Reflections collected                               | 4208               |
| Independent reflections                             | 3396               |
| Completeness to theta = 24.995                      | 99.9%              |
| R (reflections)                                     | 0.0385 (3396)      |

|                   |               |
|-------------------|---------------|
| wR2 (reflections) | 0.0823 (4208) |
|-------------------|---------------|

### X-ray data of **5ak**

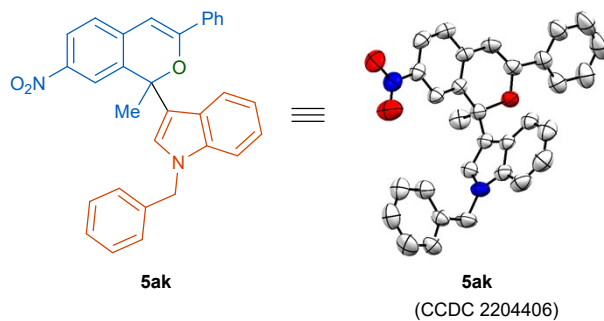

**Figure 1:** ORTEP representation of **5ak**. Thermal ellipsoids are drawn with 50% probability.

**Table S1. Crystallographic data of compound **5ak****

|                     |                                                               |
|---------------------|---------------------------------------------------------------|
| Compound            | <b>5ak</b>                                                    |
| Identification code | rb005a                                                        |
| CCDC                | <b>2204406</b>                                                |
| Empirical formula   | C <sub>31</sub> H <sub>24</sub> N <sub>2</sub> O <sub>3</sub> |
| Formula weight      | 472.52                                                        |
| Temperature/K       | 300                                                           |
| Crystal system      | Monoclinic                                                    |

|                                                     |                    |
|-----------------------------------------------------|--------------------|
| Space group                                         | C12/C1             |
| a/Å                                                 | 27.630(4)          |
| b/ Å                                                | 9.6103(12)         |
| c/ Å                                                | 22.543(3)          |
| $\alpha$ /°                                         | 90                 |
| $\beta$ /°                                          | 123.585(4)         |
| $\gamma$ /°                                         | 90                 |
| Volume/Å <sup>3</sup>                               | 4986.5(11)         |
| Z                                                   | 8                  |
| Density( $\rho$ )calc g/cm <sup>3</sup>             | 1.259              |
| Absorption Coefficient( $\mu$ ) (mm <sup>-1</sup> ) | 0.082              |
| F(000)                                              | 1984.0             |
| Crystal size/mm <sup>3</sup>                        | 0.02 x 0.02 x 0.01 |
| Reflections collected                               | 3602               |
| Independent reflections                             | 4385               |
| Completeness to theta = 24.995                      | 99.9%              |
| R (reflections)                                     | 0.0553 (3602)      |

|                   |               |
|-------------------|---------------|
| wR2 (reflections) | 0.1521 (4385) |
|-------------------|---------------|

## 16. References

- (1) (a) P. Y. Choy, C. P. Lau and F. Y. Kwong, *J. Org. Chem.*, 2011, **76**, 80-84. (b) X.-H. Xu, G.-K. Liu, A. Azuma, E. Tokunaga and N. Shibata, *Org. Lett.*, 2011, **13**, 4854-4857. (c) M. Jiang, S. Chen, J. Li and L. Liu, *Mar. Drugs*, 2020, **18**, 114. (d) S. Sar, A. Tripathi, K. D. Dubey and S. Sen, *J. Org. Chem.*, 2020, **85**, 3748-3756. (e) J. S. McGough, J. Cid, M and J. Ingleson, *Chem. - Eur. J.*, 2017, **23**, 8180-8184.
- (2) S. Manojveer and R. Balamurugan, *Org. Lett.*, 2014, **16**, 1712-1715.
- (3) J. Santhi and B. Baire, *ChemistrySelect*, 2017, **2** (16), 4338-4342.
- (4) R. J. Faggyas, E. D. D. Calder, C. Wilson and A. Sutherland, *J. Org. Chem.*, 2017, **82**, 11585-11593.
- (5) T. Yamada, K. Park, T. Tachikawa, A. Fujii, M. Rudolph, A. S. K. Hashmi and H. Sajiki, *Org. Lett.*, 2020, **22**, 1883-1888.
